# Supplementary material
Source: publisher figshare collection journal article supplement (https://acs.figshare.com/ndownloader/files/11322446)
Supplement: Supplementary file 1 [file 11322446]

 
data_kw1010s 
  
_audit_creation_method            SHELXL-2013 
_chemical_name_systematic 
; 
 ? 
; 
_chemical_name_common             ? 
_chemical_melting_point           ? 
_chemical_formula_moiety          'C16 H23 O3 P' 
_chemical_formula_sum 
 'C16 H23 O3 P' 
_chemical_formula_weight          294.31 
  
loop_ 
 _atom_type_symbol 
 _atom_type_description 
 _atom_type_scat_dispersion_real 
 _atom_type_scat_dispersion_imag 
 _atom_type_scat_source 
 'C'  'C'   0.0033   0.0016 
 'International Tables Vol C Tables 4.2.6.8 and 6.1.1.4' 
 'H'  'H'   0.0000   0.0000 
 'International Tables Vol C Tables 4.2.6.8 and 6.1.1.4' 
 'O'  'O'   0.0106   0.0060 
 'International Tables Vol C Tables 4.2.6.8 and 6.1.1.4' 
 'P'  'P'   0.1023   0.0942 
 'International Tables Vol C Tables 4.2.6.8 and 6.1.1.4' 
  
_space_group_crystal_system       monoclinic 
_space_group_IT_number            4 
_space_group_name_H-M_alt         'P 21' 
_space_group_name_Hall            'P 2yb' 
  
_shelx_space_group_comment 
; 
The symmetry employed for this shelxl refinement is uniquely defined 
by the following loop, which should always be used as a source of 
symmetry information in preference to the above space-group names. 
They are only intended as comments. 
; 
  
loop_ 
 _space_group_symop_operation_xyz 
 'x, y, z' 
 '-x, y+1/2, -z' 
  
_cell_length_a                    10.2543(6) 
_cell_length_b                    10.9798(7) 
_cell_length_c                    13.7645(9) 
_cell_angle_alpha                 90 
_cell_angle_beta                  90.5900(10) 
_cell_angle_gamma                 90 
_cell_volume                      1549.66(17) 
_cell_formula_units_Z             4 
_cell_measurement_temperature     100(2) 
_cell_measurement_reflns_used     9700 
_cell_measurement_theta_min       4.00 
_cell_measurement_theta_max       29.82 
  
_exptl_crystal_description        block 
_exptl_crystal_colour             colorless 
_exptl_crystal_density_meas       0 
_exptl_crystal_density_method     ? 
_exptl_crystal_density_diffrn     1.261 
_exptl_crystal_F_000              632 
_exptl_transmission_factor_min    ? 
_exptl_transmission_factor_max    ? 
_exptl_crystal_size_max           0.400 
_exptl_crystal_size_mid           0.400 
_exptl_crystal_size_min           0.200 
_exptl_absorpt_coefficient_mu     0.182 
_shelx_estimated_absorpt_T_min    0.931 
_shelx_estimated_absorpt_T_max    0.964 
_exptl_absorpt_correction_type    multi-scan 
_exptl_absorpt_correction_T_min   0.9037 
_exptl_absorpt_correction_T_max   0.9645 
_exptl_absorpt_process_details    'SADABS V2014/2 (Bruker AXS Inc.)' 
  
_exptl_special_details 
; 
 ? 
; 
  
_diffrn_ambient_temperature       100(2) 
_diffrn_radiation_wavelength      0.71073 
_diffrn_radiation_type            MoK\a 
_diffrn_source                    'Sealed Mo X-Ray Tube' 
_diffrn_measurement_device_type   'Bruker APEX-II CCD' 
_diffrn_measurement_method        '\f and \w scans' 
_diffrn_detector_area_resol_mean  8.3333 
_diffrn_reflns_number             15377 
_diffrn_reflns_av_unetI/netI      0.0253 
_diffrn_reflns_av_R_equivalents   0.0153 
_diffrn_reflns_limit_h_min        -14 
_diffrn_reflns_limit_h_max        14 
_diffrn_reflns_limit_k_min        -14 
_diffrn_reflns_limit_k_max        15 
_diffrn_reflns_limit_l_min        -18 
_diffrn_reflns_limit_l_max        19 
_diffrn_reflns_theta_min          3.996 
_diffrn_reflns_theta_max          29.851 
_diffrn_reflns_theta_full         25.242 
_diffrn_measured_fraction_theta_max   0.985 
_diffrn_measured_fraction_theta_full  0.994 
_diffrn_reflns_Laue_measured_fraction_max    0.985 
_diffrn_reflns_Laue_measured_fraction_full   0.994 
_diffrn_reflns_point_group_measured_fraction_max   0.927 
_diffrn_reflns_point_group_measured_fraction_full  0.978 
_reflns_number_total              8275 
_reflns_number_gt                 7979 
_reflns_threshold_expression      'I > 2\s(I)' 
_reflns_Friedel_coverage          0.793 
_reflns_Friedel_fraction_max      0.862 
_reflns_Friedel_fraction_full     0.960 
  
_reflns_special_details 
; 
 Reflections were merged by SHELXL according to the crystal 
 class for the calculation of statistics and refinement. 
  
 _reflns_Friedel_fraction is defined as the number of unique 
 Friedel pairs measured divided by the number that would be 
 possible theoretically, ignoring centric projections and 
 systematic absences. 
; 
  
_computing_data_collection        'Bruker APEX2' 
_computing_cell_refinement        'Bruker SAINT' 
_computing_data_reduction         'Bruker SAINT' 
_computing_structure_solution     'SHELXS-97 (Sheldrick, 2008)' 
_computing_structure_refinement   'SHELXL-2013 (Sheldrick, 2013)' 
_computing_molecular_graphics     'Bruker SHELXTL' 
_computing_publication_material   'Bruker SHELXTL' 
  
_refine_special_details 
; 
 ? 
; 
_refine_ls_structure_factor_coef  Fsqd 
_refine_ls_matrix_type            full 
_refine_ls_weighting_scheme       calc 
_refine_ls_weighting_details 
'w=1/[\s^2^(Fo^2^)+(0.0470P)^2^+0.1072P] where P=(Fo^2^+2Fc^2^)/3' 
_atom_sites_solution_primary      ? 
_atom_sites_solution_secondary    ? 
_atom_sites_solution_hydrogens    geom 
_refine_ls_hydrogen_treatment     constr 
_refine_ls_extinction_method      none 
_refine_ls_extinction_coef        . 
_refine_ls_abs_structure_details 
; 
 Flack x determined using 3448 quotients [(I+)-(I-)]/[(I+)+(I-)] 
 (Parsons and Flack (2004), Acta Cryst. A60, s61). 
; 
_refine_ls_abs_structure_Flack    0.072(18) 
_chemical_absolute_configuration  unk 
_refine_ls_number_reflns          8275 
_refine_ls_number_parameters      369 
_refine_ls_number_restraints      1 
_refine_ls_R_factor_all           0.0291 
_refine_ls_R_factor_gt            0.0277 
_refine_ls_wR_factor_ref          0.0720 
_refine_ls_wR_factor_gt           0.0711 
_refine_ls_goodness_of_fit_ref    1.023 
_refine_ls_restrained_S_all       1.023 
_refine_ls_shift/su_max           0.001 
_refine_ls_shift/su_mean          0.000 
  
loop_ 
 _atom_site_label 
 _atom_site_type_symbol 
 _atom_site_fract_x 
 _atom_site_fract_y 
 _atom_site_fract_z 
 _atom_site_U_iso_or_equiv 
 _atom_site_adp_type 
 _atom_site_occupancy 
 _atom_site_site_symmetry_order 
 _atom_site_calc_flag 
 _atom_site_refinement_flags_posn 
 _atom_site_refinement_flags_adp 
 _atom_site_refinement_flags_occupancy 
 _atom_site_disorder_assembly 
 _atom_site_disorder_group 
P1 P 0.45286(4) 0.92201(3) 0.54748(3) 0.01292(8) Uani 1 1 d . . . . . 
O1 O 0.20699(11) 0.93538(12) 0.37746(8) 0.0182(2) Uani 1 1 d . . . . . 
H1A H 0.1969 0.9126 0.3196 0.027 Uiso 1 1 calc R U . . . 
O2 O 0.00242(12) 0.75483(12) 0.31081(9) 0.0205(2) Uani 1 1 d . . . . . 
H2 H 0.0596 0.7739 0.2703 0.031 Uiso 1 1 calc R U . . . 
O3 O 0.48765(12) 1.00567(11) 0.46559(8) 0.0186(2) Uani 1 1 d . . . . . 
C1 C 0.63923(16) 0.76409(16) 0.63411(13) 0.0200(3) Uani 1 1 d . . . . . 
H1 H 0.5911 0.6976 0.6079 0.024 Uiso 1 1 calc R U . . . 
C2 C 0.75218(18) 0.74239(18) 0.68879(14) 0.0251(4) Uani 1 1 d . . . . . 
H2A H 0.7815 0.6613 0.6993 0.030 Uiso 1 1 calc R U . . . 
C3 C 0.82163(17) 0.83940(19) 0.72783(14) 0.0267(4) Uani 1 1 d . . . . . 
H3A H 0.8970 0.8242 0.7667 0.032 Uiso 1 1 calc R U . . . 
C4 C 0.78231(18) 0.95808(18) 0.71084(15) 0.0271(4) Uani 1 1 d . . . . . 
H4A H 0.8318 1.0241 0.7364 0.032 Uiso 1 1 calc R U . . . 
C5 C 0.66962(17) 0.98046(17) 0.65601(13) 0.0230(3) Uani 1 1 d . . . . . 
H5A H 0.6421 1.0618 0.6445 0.028 Uiso 1 1 calc R U . . . 
C6 C 0.59691(15) 0.88286(15) 0.61790(11) 0.0152(3) Uani 1 1 d . . . . . 
C7 C 0.35976(15) 0.78539(14) 0.51679(11) 0.0155(3) Uani 1 1 d . . . . . 
H7A H 0.3386 0.7827 0.4465 0.019 Uiso 1 1 calc R U . . . 
H7B H 0.4085 0.7108 0.5349 0.019 Uiso 1 1 calc R U . . . 
C8 C 0.23371(15) 0.79885(17) 0.57845(11) 0.0168(3) Uani 1 1 d . . . . . 
H8 H 0.1878 0.7194 0.5880 0.020 Uiso 1 1 calc R U . . . 
C9 C 0.14077(15) 0.90043(15) 0.54120(11) 0.0168(3) Uani 1 1 d . . . . . 
H9 H 0.0598 0.8950 0.5808 0.020 Uiso 1 1 calc R U . . . 
C10 C 0.21166(16) 1.02080(16) 0.57204(12) 0.0186(3) Uani 1 1 d . . . . . 
H10A H 0.2397 1.0674 0.5143 0.022 Uiso 1 1 calc R U . . . 
H10B H 0.1539 1.0727 0.6117 0.022 Uiso 1 1 calc R U . . . 
C11 C 0.33136(15) 0.97687(15) 0.63256(11) 0.0162(3) Uani 1 1 d . . . . . 
H11 H 0.3647 1.0368 0.6816 0.019 Uiso 1 1 calc R U . . . 
C12 C 0.28439(16) 0.85426(17) 0.67551(12) 0.0195(3) Uani 1 1 d . . . . . 
H12 H 0.3611 0.8065 0.6998 0.023 Uiso 1 1 calc R U . . . 
C13 C 0.18430(19) 0.8666(2) 0.75613(13) 0.0309(4) Uani 1 1 d . . . . . 
H13A H 0.1469 0.7865 0.7704 0.046 Uiso 1 1 calc R U . . . 
H13B H 0.1148 0.9223 0.7351 0.046 Uiso 1 1 calc R U . . . 
H13C H 0.2269 0.8990 0.8147 0.046 Uiso 1 1 calc R U . . . 
C14 C 0.09710(15) 0.89778(15) 0.43331(11) 0.0158(3) Uani 1 1 d . . . . . 
C15 C -0.01527(18) 0.98706(18) 0.41610(13) 0.0249(4) Uani 1 1 d . . . . . 
H15A H -0.0384 0.9882 0.3469 0.037 Uiso 1 1 calc R U . . . 
H15B H 0.0116 1.0688 0.4366 0.037 Uiso 1 1 calc R U . . . 
H15C H -0.0910 0.9614 0.4538 0.037 Uiso 1 1 calc R U . . . 
C16 C 0.05457(16) 0.76790(16) 0.40713(12) 0.0189(3) Uani 1 1 d . . . . . 
H16A H 0.1307 0.7130 0.4145 0.023 Uiso 1 1 calc R U . . . 
H16B H -0.0122 0.7411 0.4540 0.023 Uiso 1 1 calc R U . . . 
P2 P 0.24471(4) 0.80172(4) 0.10468(3) 0.01439(8) Uani 1 1 d . . . . . 
O4 O 0.45159(11) 0.89585(12) 0.28712(8) 0.0201(2) Uani 1 1 d . . . . . 
H4 H 0.4545 0.9352 0.3394 0.030 Uiso 1 1 calc R U . . . 
O5 O 0.78116(12) 0.82542(14) 0.20993(10) 0.0282(3) Uani 1 1 d . . . . . 
H5 H 0.8452 0.7990 0.2421 0.042 Uiso 1 1 calc R U . . . 
O6 O 0.17205(11) 0.86068(12) 0.18641(8) 0.0184(2) Uani 1 1 d . . . . . 
C17 C 0.00060(18) 0.75312(19) 0.03467(15) 0.0270(4) Uani 1 1 d . . . . . 
H17 H -0.0242 0.8158 0.0783 0.032 Uiso 1 1 calc R U . . . 
C18 C -0.0931(2) 0.6989(2) -0.02530(17) 0.0333(4) Uani 1 1 d . . . . . 
H18 H -0.1814 0.7248 -0.0225 0.040 Uiso 1 1 calc R U . . . 
C19 C -0.0574(2) 0.60729(19) -0.08900(14) 0.0285(4) Uani 1 1 d . . . . . 
H19 H -0.1211 0.5715 -0.1307 0.034 Uiso 1 1 calc R U . . . 
C20 C 0.07067(19) 0.56782(18) -0.09191(13) 0.0250(4) Uani 1 1 d . . . . . 
H20 H 0.0947 0.5043 -0.1351 0.030 Uiso 1 1 calc R U . . . 
C21 C 0.16434(17) 0.62126(17) -0.03153(13) 0.0208(3) Uani 1 1 d . . . . . 
H21 H 0.2519 0.5930 -0.0330 0.025 Uiso 1 1 calc R U . . . 
C22 C 0.13074(16) 0.71580(16) 0.03105(12) 0.0180(3) Uani 1 1 d . . . . . 
C23 C 0.38790(16) 0.71234(15) 0.13846(12) 0.0170(3) Uani 1 1 d . . . . . 
H23A H 0.4031 0.7143 0.2096 0.020 Uiso 1 1 calc R U . . . 
H23B H 0.3783 0.6266 0.1173 0.020 Uiso 1 1 calc R U . . . 
C24 C 0.50079(15) 0.77625(14) 0.08372(11) 0.0155(3) Uani 1 1 d . . . . . 
H24 H 0.5788 0.7224 0.0765 0.019 Uiso 1 1 calc R U . . . 
C25 C 0.53660(15) 0.90333(14) 0.12541(11) 0.0144(3) Uani 1 1 d . . . . . 
H25 H 0.6154 0.9316 0.0896 0.017 Uiso 1 1 calc R U . . . 
C26 C 0.42110(16) 0.98613(15) 0.09143(11) 0.0160(3) Uani 1 1 d . . . . . 
H26A H 0.3705 1.0154 0.1477 0.019 Uiso 1 1 calc R U . . . 
H26B H 0.4534 1.0573 0.0547 0.019 Uiso 1 1 calc R U . . . 
C27 C 0.33675(15) 0.90254(15) 0.02554(11) 0.0155(3) Uani 1 1 d . . . . . 
H27 H 0.2833 0.9461 -0.0247 0.019 Uiso 1 1 calc R U . . . 
C28 C 0.43858(15) 0.81150(16) -0.01571(11) 0.0168(3) Uani 1 1 d . . . . . 
H28 H 0.3923 0.7393 -0.0439 0.020 Uiso 1 1 calc R U . . . 
C29 C 0.53080(18) 0.86437(18) -0.09113(13) 0.0231(4) Uani 1 1 d . . . . . 
H29A H 0.5763 0.9351 -0.0635 0.035 Uiso 1 1 calc R U . . . 
H29B H 0.4806 0.8896 -0.1487 0.035 Uiso 1 1 calc R U . . . 
H29C H 0.5947 0.8024 -0.1096 0.035 Uiso 1 1 calc R U . . . 
C30 C 0.56880(15) 0.91574(16) 0.23452(11) 0.0161(3) Uani 1 1 d . . . . . 
C31 C 0.62177(17) 1.04399(16) 0.25452(12) 0.0202(3) Uani 1 1 d . . . . . 
H31A H 0.6390 1.0534 0.3243 0.030 Uiso 1 1 calc R U . . . 
H31B H 0.5573 1.1046 0.2334 0.030 Uiso 1 1 calc R U . . . 
H31C H 0.7029 1.0559 0.2187 0.030 Uiso 1 1 calc R U . . . 
C32 C 0.66700(16) 0.81915(17) 0.26749(12) 0.0212(3) Uani 1 1 d . . . . . 
H32A H 0.6904 0.8324 0.3366 0.025 Uiso 1 1 calc R U . . . 
H32B H 0.6273 0.7373 0.2613 0.025 Uiso 1 1 calc R U . . . 
  
loop_ 
 _atom_site_aniso_label 
 _atom_site_aniso_U_11 
 _atom_site_aniso_U_22 
 _atom_site_aniso_U_33 
 _atom_site_aniso_U_23 
 _atom_site_aniso_U_13 
 _atom_site_aniso_U_12 
P1 0.01405(17) 0.01246(17) 0.01222(17) -0.00043(13) -0.00087(12) -0.00082(13) 
O1 0.0200(5) 0.0227(6) 0.0120(5) -0.0007(4) -0.0001(4) -0.0050(5) 
O2 0.0168(6) 0.0278(6) 0.0169(6) -0.0001(5) -0.0034(4) -0.0053(5) 
O3 0.0207(6) 0.0189(6) 0.0162(5) 0.0026(4) -0.0010(4) -0.0044(4) 
C1 0.0170(8) 0.0185(8) 0.0245(8) -0.0023(6) -0.0013(6) 0.0001(6) 
C2 0.0188(8) 0.0256(9) 0.0307(9) 0.0009(7) -0.0033(7) 0.0050(7) 
C3 0.0161(8) 0.0336(10) 0.0303(10) 0.0022(8) -0.0059(7) 0.0004(7) 
C4 0.0226(9) 0.0253(9) 0.0331(10) -0.0015(7) -0.0094(7) -0.0072(7) 
C5 0.0226(8) 0.0192(8) 0.0271(9) 0.0003(7) -0.0050(7) -0.0029(6) 
C6 0.0136(7) 0.0172(7) 0.0147(7) -0.0002(5) 0.0003(5) -0.0011(5) 
C7 0.0149(7) 0.0137(7) 0.0178(7) -0.0007(5) -0.0025(5) -0.0007(5) 
C8 0.0148(7) 0.0192(7) 0.0165(7) 0.0044(6) -0.0022(5) -0.0022(6) 
C9 0.0141(7) 0.0227(9) 0.0136(7) 0.0006(6) -0.0007(5) 0.0016(6) 
C10 0.0193(8) 0.0199(8) 0.0165(7) -0.0038(6) -0.0034(6) 0.0057(6) 
C11 0.0157(7) 0.0188(7) 0.0142(7) -0.0031(6) -0.0015(5) 0.0027(6) 
C12 0.0152(7) 0.0294(9) 0.0137(7) 0.0034(6) -0.0012(5) -0.0010(6) 
C13 0.0199(8) 0.0572(13) 0.0158(8) 0.0050(8) 0.0008(6) -0.0016(8) 
C14 0.0138(7) 0.0194(8) 0.0141(7) 0.0010(5) -0.0005(5) 0.0022(5) 
C15 0.0245(8) 0.0282(9) 0.0219(8) -0.0031(7) -0.0071(6) 0.0101(7) 
C16 0.0175(8) 0.0223(8) 0.0169(7) 0.0021(6) -0.0046(6) -0.0034(6) 
P2 0.01392(17) 0.01635(18) 0.01287(17) -0.00154(15) -0.00016(13) -0.00085(14) 
O4 0.0162(5) 0.0294(7) 0.0146(5) -0.0035(5) 0.0023(4) -0.0048(5) 
O5 0.0158(6) 0.0430(9) 0.0259(7) 0.0043(6) -0.0007(5) 0.0073(5) 
O6 0.0170(5) 0.0236(6) 0.0147(5) -0.0042(5) 0.0013(4) -0.0012(5) 
C17 0.0184(8) 0.0287(9) 0.0340(10) -0.0119(8) -0.0021(7) 0.0005(7) 
C18 0.0187(9) 0.0361(11) 0.0447(12) -0.0097(9) -0.0079(8) -0.0017(8) 
C19 0.0292(10) 0.0298(9) 0.0264(9) -0.0035(8) -0.0070(7) -0.0114(8) 
C20 0.0301(9) 0.0245(9) 0.0203(8) -0.0059(7) 0.0034(7) -0.0113(7) 
C21 0.0195(8) 0.0207(8) 0.0222(8) -0.0035(6) 0.0032(6) -0.0038(6) 
C22 0.0170(7) 0.0198(8) 0.0172(7) -0.0023(6) -0.0007(6) -0.0033(6) 
C23 0.0170(7) 0.0146(7) 0.0194(7) 0.0007(6) -0.0013(6) -0.0008(5) 
C24 0.0144(7) 0.0154(7) 0.0168(7) -0.0020(5) 0.0003(5) 0.0008(5) 
C25 0.0136(6) 0.0151(7) 0.0144(7) 0.0002(5) 0.0008(5) 0.0000(5) 
C26 0.0183(7) 0.0137(7) 0.0159(7) -0.0001(6) -0.0028(5) -0.0005(6) 
C27 0.0172(7) 0.0163(8) 0.0131(7) -0.0005(5) -0.0015(5) -0.0004(6) 
C28 0.0163(7) 0.0191(7) 0.0151(7) -0.0029(6) 0.0012(5) -0.0020(6) 
C29 0.0223(8) 0.0311(10) 0.0161(8) -0.0018(7) 0.0032(6) -0.0057(7) 
C30 0.0140(7) 0.0200(7) 0.0143(7) -0.0005(6) -0.0001(5) -0.0032(6) 
C31 0.0200(8) 0.0225(8) 0.0182(8) -0.0035(6) 0.0007(6) -0.0053(6) 
C32 0.0178(7) 0.0263(9) 0.0194(8) 0.0036(6) -0.0027(6) -0.0005(6) 
  
_geom_special_details 
; 
 All esds (except the esd in the dihedral angle between two l.s. planes) 
 are estimated using the full covariance matrix.  The cell esds are taken 
 into account individually in the estimation of esds in distances, angles 
 and torsion angles; correlations between esds in cell parameters are only 
 used when they are defined by crystal symmetry.  An approximate (isotropic) 
 treatment of cell esds is used for estimating esds involving l.s. planes. 
; 
  
loop_ 
 _geom_bond_atom_site_label_1 
 _geom_bond_atom_site_label_2 
 _geom_bond_distance 
 _geom_bond_site_symmetry_2 
 _geom_bond_publ_flag 
P1 O3 1.5001(12) . ? 
P1 C6 1.8102(17) . ? 
P1 C11 1.8211(16) . ? 
P1 C7 1.8253(16) . ? 
O1 C14 1.4315(19) . ? 
O1 H1A 0.8400 . ? 
O2 C16 1.432(2) . ? 
O2 H2 0.8400 . ? 
C1 C6 1.392(2) . ? 
C1 C2 1.395(2) . ? 
C1 H1 0.9500 . ? 
C2 C3 1.387(3) . ? 
C2 H2A 0.9500 . ? 
C3 C4 1.383(3) . ? 
C3 H3A 0.9500 . ? 
C4 C5 1.395(2) . ? 
C4 H4A 0.9500 . ? 
C5 C6 1.404(2) . ? 
C5 H5A 0.9500 . ? 
C7 C8 1.561(2) . ? 
C7 H7A 0.9900 . ? 
C7 H7B 0.9900 . ? 
C8 C9 1.551(2) . ? 
C8 C12 1.553(2) . ? 
C8 H8 1.0000 . ? 
C9 C14 1.547(2) . ? 
C9 C10 1.565(2) . ? 
C9 H9 1.0000 . ? 
C10 C11 1.553(2) . ? 
C10 H10A 0.9900 . ? 
C10 H10B 0.9900 . ? 
C11 C12 1.549(2) . ? 
C11 H11 1.0000 . ? 
C12 C13 1.525(2) . ? 
C12 H12 1.0000 . ? 
C13 H13A 0.9800 . ? 
C13 H13B 0.9800 . ? 
C13 H13C 0.9800 . ? 
C14 C15 1.529(2) . ? 
C14 C16 1.533(2) . ? 
C15 H15A 0.9800 . ? 
C15 H15B 0.9800 . ? 
C15 H15C 0.9800 . ? 
C16 H16A 0.9900 . ? 
C16 H16B 0.9900 . ? 
P2 O6 1.5024(12) . ? 
P2 C22 1.8051(17) . ? 
P2 C23 1.8224(17) . ? 
P2 C27 1.8232(16) . ? 
O4 C30 1.4264(18) . ? 
O4 H4 0.8400 . ? 
O5 C32 1.422(2) . ? 
O5 H5 0.8400 . ? 
C17 C18 1.394(3) . ? 
C17 C22 1.397(2) . ? 
C17 H17 0.9500 . ? 
C18 C19 1.386(3) . ? 
C18 H18 0.9500 . ? 
C19 C20 1.384(3) . ? 
C19 H19 0.9500 . ? 
C20 C21 1.393(2) . ? 
C20 H20 0.9500 . ? 
C21 C22 1.394(2) . ? 
C21 H21 0.9500 . ? 
C23 C24 1.555(2) . ? 
C23 H23A 0.9900 . ? 
C23 H23B 0.9900 . ? 
C24 C25 1.551(2) . ? 
C24 C28 1.553(2) . ? 
C24 H24 1.0000 . ? 
C25 C30 1.540(2) . ? 
C25 C26 1.561(2) . ? 
C25 H25 1.0000 . ? 
C26 C27 1.548(2) . ? 
C26 H26A 0.9900 . ? 
C26 H26B 0.9900 . ? 
C27 C28 1.557(2) . ? 
C27 H27 1.0000 . ? 
C28 C29 1.526(2) . ? 
C28 H28 1.0000 . ? 
C29 H29A 0.9800 . ? 
C29 H29B 0.9800 . ? 
C29 H29C 0.9800 . ? 
C30 C32 1.528(2) . ? 
C30 C31 1.533(2) . ? 
C31 H31A 0.9800 . ? 
C31 H31B 0.9800 . ? 
C31 H31C 0.9800 . ? 
C32 H32A 0.9900 . ? 
C32 H32B 0.9900 . ? 
  
loop_ 
 _geom_angle_atom_site_label_1 
 _geom_angle_atom_site_label_2 
 _geom_angle_atom_site_label_3 
 _geom_angle 
 _geom_angle_site_symmetry_1 
 _geom_angle_site_symmetry_3 
 _geom_angle_publ_flag 
O3 P1 C6 110.41(7) . . ? 
O3 P1 C11 116.76(8) . . ? 
C6 P1 C11 107.11(7) . . ? 
O3 P1 C7 117.20(7) . . ? 
C6 P1 C7 110.54(7) . . ? 
C11 P1 C7 93.50(8) . . ? 
C14 O1 H1A 109.5 . . ? 
C16 O2 H2 109.5 . . ? 
C6 C1 C2 120.15(16) . . ? 
C6 C1 H1 119.9 . . ? 
C2 C1 H1 119.9 . . ? 
C3 C2 C1 119.88(17) . . ? 
C3 C2 H2A 120.1 . . ? 
C1 C2 H2A 120.1 . . ? 
C4 C3 C2 120.69(16) . . ? 
C4 C3 H3A 119.7 . . ? 
C2 C3 H3A 119.7 . . ? 
C3 C4 C5 119.72(17) . . ? 
C3 C4 H4A 120.1 . . ? 
C5 C4 H4A 120.1 . . ? 
C4 C5 C6 120.08(17) . . ? 
C4 C5 H5A 120.0 . . ? 
C6 C5 H5A 120.0 . . ? 
C1 C6 C5 119.46(15) . . ? 
C1 C6 P1 124.04(13) . . ? 
C5 C6 P1 116.49(12) . . ? 
C8 C7 P1 103.32(11) . . ? 
C8 C7 H7A 111.1 . . ? 
P1 C7 H7A 111.1 . . ? 
C8 C7 H7B 111.1 . . ? 
P1 C7 H7B 111.1 . . ? 
H7A C7 H7B 109.1 . . ? 
C9 C8 C12 101.64(14) . . ? 
C9 C8 C7 113.44(13) . . ? 
C12 C8 C7 103.50(12) . . ? 
C9 C8 H8 112.5 . . ? 
C12 C8 H8 112.5 . . ? 
C7 C8 H8 112.5 . . ? 
C14 C9 C8 118.34(13) . . ? 
C14 C9 C10 113.92(13) . . ? 
C8 C9 C10 103.62(12) . . ? 
C14 C9 H9 106.8 . . ? 
C8 C9 H9 106.8 . . ? 
C10 C9 H9 106.8 . . ? 
C11 C10 C9 104.22(13) . . ? 
C11 C10 H10A 110.9 . . ? 
C9 C10 H10A 110.9 . . ? 
C11 C10 H10B 110.9 . . ? 
C9 C10 H10B 110.9 . . ? 
H10A C10 H10B 108.9 . . ? 
C12 C11 C10 103.15(13) . . ? 
C12 C11 P1 100.11(11) . . ? 
C10 C11 P1 107.46(11) . . ? 
C12 C11 H11 114.8 . . ? 
C10 C11 H11 114.8 . . ? 
P1 C11 H11 114.8 . . ? 
C13 C12 C11 114.49(16) . . ? 
C13 C12 C8 116.05(14) . . ? 
C11 C12 C8 96.59(12) . . ? 
C13 C12 H12 109.7 . . ? 
C11 C12 H12 109.7 . . ? 
C8 C12 H12 109.7 . . ? 
C12 C13 H13A 109.5 . . ? 
C12 C13 H13B 109.5 . . ? 
H13A C13 H13B 109.5 . . ? 
C12 C13 H13C 109.5 . . ? 
H13A C13 H13C 109.5 . . ? 
H13B C13 H13C 109.5 . . ? 
O1 C14 C15 109.14(13) . . ? 
O1 C14 C16 111.45(13) . . ? 
C15 C14 C16 110.35(13) . . ? 
O1 C14 C9 106.76(12) . . ? 
C15 C14 C9 110.29(13) . . ? 
C16 C14 C9 108.79(13) . . ? 
C14 C15 H15A 109.5 . . ? 
C14 C15 H15B 109.5 . . ? 
H15A C15 H15B 109.5 . . ? 
C14 C15 H15C 109.5 . . ? 
H15A C15 H15C 109.5 . . ? 
H15B C15 H15C 109.5 . . ? 
O2 C16 C14 114.42(13) . . ? 
O2 C16 H16A 108.7 . . ? 
C14 C16 H16A 108.7 . . ? 
O2 C16 H16B 108.7 . . ? 
C14 C16 H16B 108.7 . . ? 
H16A C16 H16B 107.6 . . ? 
O6 P2 C22 108.81(7) . . ? 
O6 P2 C23 116.45(7) . . ? 
C22 P2 C23 112.16(8) . . ? 
O6 P2 C27 116.71(7) . . ? 
C22 P2 C27 108.54(7) . . ? 
C23 P2 C27 93.36(7) . . ? 
C30 O4 H4 109.5 . . ? 
C32 O5 H5 109.5 . . ? 
C18 C17 C22 120.42(18) . . ? 
C18 C17 H17 119.8 . . ? 
C22 C17 H17 119.8 . . ? 
C19 C18 C17 120.00(19) . . ? 
C19 C18 H18 120.0 . . ? 
C17 C18 H18 120.0 . . ? 
C20 C19 C18 120.13(17) . . ? 
C20 C19 H19 119.9 . . ? 
C18 C19 H19 119.9 . . ? 
C19 C20 C21 119.97(17) . . ? 
C19 C20 H20 120.0 . . ? 
C21 C20 H20 120.0 . . ? 
C20 C21 C22 120.58(17) . . ? 
C20 C21 H21 119.7 . . ? 
C22 C21 H21 119.7 . . ? 
C21 C22 C17 118.85(15) . . ? 
C21 C22 P2 124.97(13) . . ? 
C17 C22 P2 116.09(13) . . ? 
C24 C23 P2 103.61(11) . . ? 
C24 C23 H23A 111.0 . . ? 
P2 C23 H23A 111.0 . . ? 
C24 C23 H23B 111.0 . . ? 
P2 C23 H23B 111.0 . . ? 
H23A C23 H23B 109.0 . . ? 
C25 C24 C28 101.26(12) . . ? 
C25 C24 C23 113.65(13) . . ? 
C28 C24 C23 103.80(12) . . ? 
C25 C24 H24 112.4 . . ? 
C28 C24 H24 112.4 . . ? 
C23 C24 H24 112.4 . . ? 
C30 C25 C24 119.20(13) . . ? 
C30 C25 C26 113.26(13) . . ? 
C24 C25 C26 103.71(12) . . ? 
C30 C25 H25 106.6 . . ? 
C24 C25 H25 106.6 . . ? 
C26 C25 H25 106.6 . . ? 
C27 C26 C25 104.35(12) . . ? 
C27 C26 H26A 110.9 . . ? 
C25 C26 H26A 110.9 . . ? 
C27 C26 H26B 110.9 . . ? 
C25 C26 H26B 110.9 . . ? 
H26A C26 H26B 108.9 . . ? 
C26 C27 C28 102.80(12) . . ? 
C26 C27 P2 107.43(10) . . ? 
C28 C27 P2 100.45(11) . . ? 
C26 C27 H27 114.8 . . ? 
C28 C27 H27 114.8 . . ? 
P2 C27 H27 114.8 . . ? 
C29 C28 C24 116.26(13) . . ? 
C29 C28 C27 115.25(15) . . ? 
C24 C28 C27 96.29(11) . . ? 
C29 C28 H28 109.4 . . ? 
C24 C28 H28 109.4 . . ? 
C27 C28 H28 109.4 . . ? 
C28 C29 H29A 109.5 . . ? 
C28 C29 H29B 109.5 . . ? 
H29A C29 H29B 109.5 . . ? 
C28 C29 H29C 109.5 . . ? 
H29A C29 H29C 109.5 . . ? 
H29B C29 H29C 109.5 . . ? 
O4 C30 C32 107.40(13) . . ? 
O4 C30 C31 110.38(13) . . ? 
C32 C30 C31 110.67(13) . . ? 
O4 C30 C25 107.94(12) . . ? 
C32 C30 C25 111.23(14) . . ? 
C31 C30 C25 109.17(13) . . ? 
C30 C31 H31A 109.5 . . ? 
C30 C31 H31B 109.5 . . ? 
H31A C31 H31B 109.5 . . ? 
C30 C31 H31C 109.5 . . ? 
H31A C31 H31C 109.5 . . ? 
H31B C31 H31C 109.5 . . ? 
O5 C32 C30 110.16(14) . . ? 
O5 C32 H32A 109.6 . . ? 
C30 C32 H32A 109.6 . . ? 
O5 C32 H32B 109.6 . . ? 
C30 C32 H32B 109.6 . . ? 
H32A C32 H32B 108.1 . . ? 
  
loop_ 
 _geom_torsion_atom_site_label_1 
 _geom_torsion_atom_site_label_2 
 _geom_torsion_atom_site_label_3 
 _geom_torsion_atom_site_label_4 
 _geom_torsion 
 _geom_torsion_site_symmetry_1 
 _geom_torsion_site_symmetry_2 
 _geom_torsion_site_symmetry_3 
 _geom_torsion_site_symmetry_4 
 _geom_torsion_publ_flag 
C6 C1 C2 C3 0.6(3) . . . . ? 
C1 C2 C3 C4 -1.9(3) . . . . ? 
C2 C3 C4 C5 1.7(3) . . . . ? 
C3 C4 C5 C6 -0.3(3) . . . . ? 
C2 C1 C6 C5 0.8(3) . . . . ? 
C2 C1 C6 P1 179.50(13) . . . . ? 
C4 C5 C6 C1 -0.9(3) . . . . ? 
C4 C5 C6 P1 -179.76(14) . . . . ? 
O3 P1 C6 C1 -122.99(14) . . . . ? 
C11 P1 C6 C1 108.89(15) . . . . ? 
C7 P1 C6 C1 8.32(17) . . . . ? 
O3 P1 C6 C5 55.79(15) . . . . ? 
C11 P1 C6 C5 -72.32(14) . . . . ? 
C7 P1 C6 C5 -172.89(13) . . . . ? 
O3 P1 C7 C8 -121.34(10) . . . . ? 
C6 P1 C7 C8 110.98(10) . . . . ? 
C11 P1 C7 C8 1.25(11) . . . . ? 
P1 C7 C8 C9 71.18(14) . . . . ? 
P1 C7 C8 C12 -38.10(14) . . . . ? 
C12 C8 C9 C14 164.00(14) . . . . ? 
C7 C8 C9 C14 53.57(19) . . . . ? 
C12 C8 C9 C10 36.79(14) . . . . ? 
C7 C8 C9 C10 -73.63(15) . . . . ? 
C14 C9 C10 C11 -135.21(14) . . . . ? 
C8 C9 C10 C11 -5.28(15) . . . . ? 
C9 C10 C11 C12 -28.24(16) . . . . ? 
C9 C10 C11 P1 76.97(14) . . . . ? 
O3 P1 C11 C12 158.39(9) . . . . ? 
C6 P1 C11 C12 -77.28(11) . . . . ? 
C7 P1 C11 C12 35.45(11) . . . . ? 
O3 P1 C11 C10 51.04(13) . . . . ? 
C6 P1 C11 C10 175.36(11) . . . . ? 
C7 P1 C11 C10 -71.90(12) . . . . ? 
C10 C11 C12 C13 -72.55(17) . . . . ? 
P1 C11 C12 C13 176.68(12) . . . . ? 
C10 C11 C12 C8 50.02(14) . . . . ? 
P1 C11 C12 C8 -60.75(12) . . . . ? 
C9 C8 C12 C13 68.12(19) . . . . ? 
C7 C8 C12 C13 -174.03(16) . . . . ? 
C9 C8 C12 C11 -53.27(14) . . . . ? 
C7 C8 C12 C11 64.58(15) . . . . ? 
C8 C9 C14 O1 -73.71(17) . . . . ? 
C10 C9 C14 O1 48.42(17) . . . . ? 
C8 C9 C14 C15 167.83(14) . . . . ? 
C10 C9 C14 C15 -70.03(17) . . . . ? 
C8 C9 C14 C16 46.67(18) . . . . ? 
C10 C9 C14 C16 168.81(13) . . . . ? 
O1 C14 C16 O2 -67.01(17) . . . . ? 
C15 C14 C16 O2 54.43(18) . . . . ? 
C9 C14 C16 O2 175.55(13) . . . . ? 
C22 C17 C18 C19 0.1(3) . . . . ? 
C17 C18 C19 C20 1.2(3) . . . . ? 
C18 C19 C20 C21 -0.8(3) . . . . ? 
C19 C20 C21 C22 -1.0(3) . . . . ? 
C20 C21 C22 C17 2.3(3) . . . . ? 
C20 C21 C22 P2 -174.14(14) . . . . ? 
C18 C17 C22 C21 -1.8(3) . . . . ? 
C18 C17 C22 P2 174.91(17) . . . . ? 
O6 P2 C22 C21 -159.41(15) . . . . ? 
C23 P2 C22 C21 -29.12(18) . . . . ? 
C27 P2 C22 C21 72.62(17) . . . . ? 
O6 P2 C22 C17 24.11(17) . . . . ? 
C23 P2 C22 C17 154.41(14) . . . . ? 
C27 P2 C22 C17 -103.85(15) . . . . ? 
O6 P2 C23 C24 -120.45(11) . . . . ? 
C22 P2 C23 C24 113.29(11) . . . . ? 
C27 P2 C23 C24 1.70(11) . . . . ? 
P2 C23 C24 C25 70.50(14) . . . . ? 
P2 C23 C24 C28 -38.60(13) . . . . ? 
C28 C24 C25 C30 164.21(13) . . . . ? 
C23 C24 C25 C30 53.56(18) . . . . ? 
C28 C24 C25 C26 37.19(14) . . . . ? 
C23 C24 C25 C26 -73.46(15) . . . . ? 
C30 C25 C26 C27 -135.84(13) . . . . ? 
C24 C25 C26 C27 -5.20(15) . . . . ? 
C25 C26 C27 C28 -28.64(15) . . . . ? 
C25 C26 C27 P2 76.80(13) . . . . ? 
O6 P2 C27 C26 49.77(13) . . . . ? 
C22 P2 C27 C26 173.11(11) . . . . ? 
C23 P2 C27 C26 -72.17(11) . . . . ? 
O6 P2 C27 C28 156.87(9) . . . . ? 
C22 P2 C27 C28 -79.80(11) . . . . ? 
C23 P2 C27 C28 34.93(10) . . . . ? 
C25 C24 C28 C29 68.46(17) . . . . ? 
C23 C24 C28 C29 -173.50(14) . . . . ? 
C25 C24 C28 C27 -53.74(13) . . . . ? 
C23 C24 C28 C27 64.30(14) . . . . ? 
C26 C27 C28 C29 -72.32(16) . . . . ? 
P2 C27 C28 C29 176.94(12) . . . . ? 
C26 C27 C28 C24 50.64(14) . . . . ? 
P2 C27 C28 C24 -60.10(11) . . . . ? 
C24 C25 C30 O4 -68.99(18) . . . . ? 
C26 C25 C30 O4 53.40(17) . . . . ? 
C24 C25 C30 C32 48.59(18) . . . . ? 
C26 C25 C30 C32 170.99(13) . . . . ? 
C24 C25 C30 C31 170.99(13) . . . . ? 
C26 C25 C30 C31 -66.61(16) . . . . ? 
O4 C30 C32 O5 173.52(13) . . . . ? 
C31 C30 C32 O5 -65.92(17) . . . . ? 
C25 C30 C32 O5 55.61(18) . . . . ? 
  
_refine_diff_density_max    0.305 
_refine_diff_density_min   -0.224 
_refine_diff_density_rms    0.043 
  
_shelxl_version_number 2013-4 
  
_shelx_res_file 
; 
TITL kw1010s in P2(1) 
CELL 0.71073  10.2543  10.9798  13.7645  90.000  90.590  90.000 
ZERR    4.00   0.0006   0.0007   0.0009   0.000   0.001   0.000 
LATT -1 
SYMM -X, 0.5+Y, -Z 
SFAC C  H  O  P 
UNIT 64 92 12 4 
L.S. 20 
ACTA 
BOND $H 
FMAP 2 
PLAN 5 
conf 
htab 
size .4 .4 .2 
TEMP -173 
WGHT    0.047000    0.107200 
FVAR       0.24942 
MOLE 1 
P1    4    0.452862    0.922008    0.547485    11.00000    0.01405    0.01246 = 
         0.01222   -0.00043   -0.00087   -0.00082 
O1    3    0.206993    0.935378    0.377460    11.00000    0.01997    0.02267 = 
         0.01198   -0.00066   -0.00012   -0.00501 
AFIX 147 
H1A   2    0.196920    0.912589    0.319611    11.00000   -1.50000 
AFIX   0 
O2    3    0.002421    0.754833    0.310805    11.00000    0.01681    0.02783 = 
         0.01693   -0.00011   -0.00342   -0.00530 
AFIX 147 
H2    2    0.059626    0.773858    0.270281    11.00000   -1.50000 
AFIX   0 
O3    3    0.487654    1.005669    0.465585    11.00000    0.02067    0.01886 = 
         0.01615    0.00259   -0.00097   -0.00436 
C1    1    0.639232    0.764087    0.634115    11.00000    0.01697    0.01848 = 
         0.02450   -0.00228   -0.00130    0.00013 
AFIX  43 
H1    2    0.591107    0.697633    0.607895    11.00000   -1.20000 
AFIX   0 
C2    1    0.752183    0.742395    0.688791    11.00000    0.01885    0.02558 = 
         0.03073    0.00089   -0.00330    0.00497 
AFIX  43 
H2A   2    0.781452    0.661312    0.699251    11.00000   -1.20000 
AFIX   0 
C3    1    0.821633    0.839404    0.727831    11.00000    0.01610    0.03365 = 
         0.03034    0.00222   -0.00590    0.00043 
AFIX  43 
H3A   2    0.897017    0.824203    0.766656    11.00000   -1.20000 
AFIX   0 
C4    1    0.782305    0.958078    0.710839    11.00000    0.02260    0.02528 = 
         0.03308   -0.00153   -0.00937   -0.00720 
AFIX  43 
H4A   2    0.831800    1.024065    0.736386    11.00000   -1.20000 
AFIX   0 
C5    1    0.669616    0.980458    0.656012    11.00000    0.02260    0.01916 = 
         0.02715    0.00034   -0.00502   -0.00290 
AFIX  43 
H5A   2    0.642059    1.061831    0.644458    11.00000   -1.20000 
AFIX   0 
C6    1    0.596913    0.882858    0.617904    11.00000    0.01361    0.01718 = 
         0.01470   -0.00016    0.00028   -0.00107 
C7    1    0.359758    0.785391    0.516788    11.00000    0.01494    0.01373 = 
         0.01784   -0.00072   -0.00248   -0.00074 
AFIX  23 
H7A   2    0.338586    0.782672    0.446485    11.00000   -1.20000 
H7B   2    0.408493    0.710807    0.534921    11.00000   -1.20000 
AFIX   0 
C8    1    0.233712    0.798848    0.578451    11.00000    0.01480    0.01921 = 
         0.01645    0.00436   -0.00220   -0.00225 
AFIX  13 
H8    2    0.187843    0.719438    0.588001    11.00000   -1.20000 
AFIX   0 
C9    1    0.140773    0.900433    0.541199    11.00000    0.01410    0.02270 = 
         0.01358    0.00056   -0.00074    0.00160 
AFIX  13 
H9    2    0.059765    0.895042    0.580801    11.00000   -1.20000 
AFIX   0 
C10   1    0.211664    1.020800    0.572040    11.00000    0.01933    0.01987 = 
         0.01645   -0.00382   -0.00344    0.00569 
AFIX  23 
H10A  2    0.239651    1.067442    0.514340    11.00000   -1.20000 
H10B  2    0.153917    1.072706    0.611699    11.00000   -1.20000 
AFIX   0 
C11   1    0.331360    0.976870    0.632560    11.00000    0.01568    0.01876 = 
         0.01419   -0.00313   -0.00151    0.00274 
AFIX  13 
H11   2    0.364687    1.036813    0.681553    11.00000   -1.20000 
AFIX   0 
C12   1    0.284387    0.854263    0.675514    11.00000    0.01519    0.02943 = 
         0.01370    0.00337   -0.00118   -0.00105 
AFIX  13 
H12   2    0.361095    0.806479    0.699765    11.00000   -1.20000 
AFIX   0 
C13   1    0.184301    0.866633    0.756130    11.00000    0.01987    0.05721 = 
         0.01578    0.00498    0.00080   -0.00161 
AFIX 137 
H13A  2    0.146876    0.786548    0.770362    11.00000   -1.50000 
H13B  2    0.114815    0.922273    0.735108    11.00000   -1.50000 
H13C  2    0.226907    0.899026    0.814716    11.00000   -1.50000 
AFIX   0 
C14   1    0.097098    0.897775    0.433308    11.00000    0.01381    0.01939 = 
         0.01412    0.00102   -0.00052    0.00221 
C15   1   -0.015268    0.987061    0.416096    11.00000    0.02447    0.02817 = 
         0.02186   -0.00312   -0.00706    0.01008 
AFIX 137 
H15A  2   -0.038445    0.988163    0.346852    11.00000   -1.50000 
H15B  2    0.011637    1.068845    0.436587    11.00000   -1.50000 
H15C  2   -0.090995    0.961387    0.453822    11.00000   -1.50000 
AFIX   0 
C16   1    0.054566    0.767895    0.407129    11.00000    0.01746    0.02227 = 
         0.01695    0.00210   -0.00464   -0.00343 
AFIX  23 
H16A  2    0.130662    0.713048    0.414455    11.00000   -1.20000 
H16B  2   -0.012159    0.741120    0.454011    11.00000   -1.20000 
AFIX   0 
MOLE 2 
P2    4    0.244707    0.801717    0.104675    11.00000    0.01392    0.01635 = 
         0.01287   -0.00154   -0.00016   -0.00085 
O4    3    0.451587    0.895847    0.287122    11.00000    0.01622    0.02940 = 
         0.01463   -0.00354    0.00229   -0.00484 
AFIX 147 
H4    2    0.454544    0.935176    0.339443    11.00000   -1.50000 
AFIX   0 
O5    3    0.781164    0.825424    0.209929    11.00000    0.01581    0.04297 = 
         0.02593    0.00429   -0.00072    0.00735 
AFIX 147 
H5    2    0.845215    0.799002    0.242096    11.00000   -1.50000 
AFIX   0 
O6    3    0.172053    0.860677    0.186415    11.00000    0.01703    0.02360 = 
         0.01471   -0.00419    0.00135   -0.00117 
C17   1    0.000604    0.753120    0.034672    11.00000    0.01837    0.02869 = 
         0.03403   -0.01190   -0.00211    0.00047 
AFIX  43 
H17   2   -0.024167    0.815837    0.078301    11.00000   -1.20000 
AFIX   0 
C18   1   -0.093073    0.698929   -0.025302    11.00000    0.01874    0.03613 = 
         0.04471   -0.00971   -0.00787   -0.00173 
AFIX  43 
H18   2   -0.181363    0.724796   -0.022531    11.00000   -1.20000 
AFIX   0 
C19   1   -0.057437    0.607290   -0.088996    11.00000    0.02917    0.02984 = 
         0.02641   -0.00351   -0.00697   -0.01137 
AFIX  43 
H19   2   -0.121060    0.571498   -0.130740    11.00000   -1.20000 
AFIX   0 
C20   1    0.070666    0.567819   -0.091906    11.00000    0.03008    0.02452 = 
         0.02033   -0.00594    0.00344   -0.01127 
AFIX  43 
H20   2    0.094701    0.504324   -0.135052    11.00000   -1.20000 
AFIX   0 
C21   1    0.164341    0.621258   -0.031526    11.00000    0.01952    0.02073 = 
         0.02217   -0.00345    0.00325   -0.00382 
AFIX  43 
H21   2    0.251875    0.593034   -0.033002    11.00000   -1.20000 
AFIX   0 
C22   1    0.130735    0.715800    0.031046    11.00000    0.01699    0.01981 = 
         0.01723   -0.00232   -0.00065   -0.00326 
C23   1    0.387905    0.712345    0.138461    11.00000    0.01696    0.01462 = 
         0.01941    0.00068   -0.00128   -0.00078 
AFIX  23 
H23A  2    0.403111    0.714292    0.209588    11.00000   -1.20000 
H23B  2    0.378257    0.626619    0.117288    11.00000   -1.20000 
AFIX   0 
C24   1    0.500787    0.776249    0.083720    11.00000    0.01442    0.01540 = 
         0.01679   -0.00204    0.00032    0.00084 
AFIX  13 
H24   2    0.578775    0.722444    0.076518    11.00000   -1.20000 
AFIX   0 
C25   1    0.536598    0.903325    0.125411    11.00000    0.01363    0.01506 = 
         0.01438    0.00025    0.00079    0.00000 
AFIX  13 
H25   2    0.615413    0.931580    0.089643    11.00000   -1.20000 
AFIX   0 
C26   1    0.421098    0.986128    0.091427    11.00000    0.01827    0.01375 = 
         0.01585   -0.00015   -0.00280   -0.00046 
AFIX  23 
H26A  2    0.370518    1.015369    0.147689    11.00000   -1.20000 
H26B  2    0.453371    1.057329    0.054671    11.00000   -1.20000 
AFIX   0 
C27   1    0.336751    0.902538    0.025539    11.00000    0.01720    0.01631 = 
         0.01307   -0.00050   -0.00147   -0.00040 
AFIX  13 
H27   2    0.283282    0.946141   -0.024689    11.00000   -1.20000 
AFIX   0 
C28   1    0.438580    0.811503   -0.015713    11.00000    0.01630    0.01906 = 
         0.01510   -0.00287    0.00117   -0.00201 
AFIX  13 
H28   2    0.392302    0.739303   -0.043865    11.00000   -1.20000 
AFIX   0 
C29   1    0.530804    0.864369   -0.091126    11.00000    0.02228    0.03106 = 
         0.01610   -0.00179    0.00322   -0.00567 
AFIX 137 
H29A  2    0.576256    0.935071   -0.063540    11.00000   -1.50000 
H29B  2    0.480630    0.889553   -0.148682    11.00000   -1.50000 
H29C  2    0.594747    0.802431   -0.109583    11.00000   -1.50000 
AFIX   0 
C30   1    0.568798    0.915740    0.234517    11.00000    0.01396    0.01995 = 
         0.01428   -0.00051   -0.00012   -0.00319 
C31   1    0.621770    1.043990    0.254520    11.00000    0.01999    0.02252 = 
         0.01817   -0.00355    0.00069   -0.00530 
AFIX 137 
H31A  2    0.639035    1.053446    0.324271    11.00000   -1.50000 
H31B  2    0.557275    1.104570    0.233395    11.00000   -1.50000 
H31C  2    0.702858    1.055930    0.218679    11.00000   -1.50000 
AFIX   0 
C32   1    0.666999    0.819146    0.267485    11.00000    0.01783    0.02631 = 
         0.01939    0.00360   -0.00274   -0.00053 
AFIX  23 
H32A  2    0.690389    0.832400    0.336641    11.00000   -1.20000 
H32B  2    0.627345    0.737268    0.261299    11.00000   -1.20000 
AFIX   0 
HKLF 4 
  
REM  kw1010s in P2(1) 
REM R1 =  0.0277 for    7979 Fo > 4sig(Fo)  and  0.0291 for all    8275 data 
REM    369 parameters refined using      1 restraints 
  
END 
  
WGHT      0.0469      0.1122 
  
REM Instructions for potential hydrogen bonds 
HTAB O1 O6 
HTAB O2 O6 
EQIV $1 -x+1, y-1/2, -z+1 
HTAB C1 O3_$1 
HTAB C7 O1 
HTAB C7 O3_$1 
HTAB O4 O3 
EQIV $2 x+1, y, z 
HTAB O5 O2_$2 
HTAB C23 O4 
HTAB C31 O3 
  
REM Highest difference peak  0.305,  deepest hole -0.224,  1-sigma level  0.043 
Q1    1   0.4833  0.9818  0.5138  11.00000  0.05    0.31 
Q2    1   0.5474  0.9142  0.1793  11.00000  0.05    0.30 
Q3    1   0.5992  0.9769  0.2416  11.00000  0.05    0.30 
Q4    1   0.3058  0.9206  0.6603  11.00000  0.05    0.30 
Q5    1   0.2961  0.8568  0.0754  11.00000  0.05    0.30 
; 
_shelx_res_checksum   74674 
  
_shelx_hkl_file 
; 
  -3   0   0  115.30    1.52 
  -3   0   0  112.58    1.53 
  -3   0   0  114.07    1.59 
  -4   0   0   45.70    0.73 
  -4   0   0   47.19    0.74 
  -4   0   0   46.65    0.79 
  -5   0   0  136.54    1.89 
  -5   0   0  137.47    2.00 
  -5   0   0  137.30    1.90 
  -6   0   0    1.07    0.13 
  -6   0   0    1.14    0.12 
  -6   0   0    1.15    0.12 
  -7   0   0   17.97    0.51 
  -7   0   0   17.59    0.44 
  -8   0   0    0.10    0.07 
  -8   0   0    0.02    0.07 
   8   0   0    0.15    0.08 
  -9   0   0   57.07    1.18 
  -9   0   0   55.74    1.03 
   9   0   0   55.39    1.07 
 -10   0   0   20.89    0.68 
  10   0   0   21.87    0.61 
 -11   0   0    7.26    0.43 
 -12   0   0    4.09    0.39 
 -13   0   0   11.00    0.57 
 -14   0   0    0.39    0.20 
  -2  -1   0   28.47    0.49 
   2   1   0   29.32    0.46 
  -2   1   0   28.58    0.47 
  -3  -1   0    4.91    0.18 
  -3   1   0    4.97    0.16 
   3   1   0    4.97    0.16 
  -3   1   0    4.93    0.16 
  -3   1   0    5.06    0.15 
  -4  -1   0   62.00    0.91 
  -4  -1   0   62.77    1.02 
  -4   1   0   63.24    0.94 
  -4   1   0   63.50    0.97 
  -4   1   0   62.00    0.98 
   4   1   0   63.85    0.96 
  -5  -1   0   40.42    0.67 
  -5  -1   0   41.55    0.80 
   5   1   0   42.42    0.73 
  -5   1   0   41.37    0.73 
  -5   1   0   42.25    0.71 
  -5   1   0   41.40    0.76 
  -6  -1   0   38.20    0.78 
  -6  -1   0   35.66    0.64 
   6   1   0   37.50    0.71 
  -6   1   0   36.92    0.68 
  -6   1   0   36.25    0.70 
  -6   1   0   36.68    0.74 
  -7  -1   0   15.84    0.49 
  -7  -1   0   14.51    0.37 
  -7   1   0   14.94    0.45 
   7   1   0   14.94    0.42 
  -7   1   0   14.62    0.41 
  -7   1   0   14.99    0.42 
  -8  -1   0   21.88    0.50 
  -8  -1   0   21.38    0.62 
  -8   1   0   21.55    0.60 
  -8   1   0   21.11    0.54 
   8   1   0   21.20    0.55 
  -8   1   0   21.25    0.54 
  -9  -1   0   16.32    0.57 
  -9   1   0   15.99    0.48 
  -9   1   0   16.00    0.49 
  -9   1   0   14.61    0.51 
   9   1   0   15.01    0.49 
 -10  -1   0    0.19    0.14 
  10  -1   0   -0.01    0.10 
 -10   1   0    0.20    0.13 
  10   1   0   -0.02    0.09 
 -11  -1   0    9.94    0.50 
 -11   1   0    9.80    0.48 
 -12  -1   0    3.05    0.35 
 -12   1   0    3.11    0.34 
 -13  -1   0    3.00    0.37 
 -13   1   0    2.59    0.34 
 -14  -1   0    4.08    0.45 
  -1  -2   0  465.79    5.82 
   1   2   0  445.43    5.65 
  -2  -2   0   60.80    0.94 
  -2   2   0   62.44    0.87 
  -2   2   0   61.17    0.91 
   2   2   0   61.45    0.89 
  -3  -2   0  220.69    2.97 
  -3   2   0  217.61    2.81 
   3   2   0  221.94    2.85 
  -3   2   0  218.36    2.91 
  -4  -2   0   76.93    1.05 
  -4  -2   0   74.78    1.22 
  -4   2   0   76.29    1.18 
  -4   2   0   76.69    1.15 
   4   2   0   77.71    1.15 
  -4   2   0   76.86    1.11 
  -5  -2   0   26.95    0.62 
  -5  -2   0   28.13    0.48 
   5   2   0   28.81    0.57 
  -5   2   0   27.53    0.56 
  -5   2   0   27.04    0.57 
  -5   2   0   28.18    0.54 
  -6  -2   0    5.86    0.19 
  -6  -2   0    5.52    0.27 
  -6   2   0    5.26    0.23 
  -6   2   0    5.15    0.22 
   6   2   0    5.69    0.25 
  -6   2   0    5.27    0.24 
  -7  -2   0    1.60    0.12 
  -7  -2   0    1.56    0.19 
  -7   2   0    2.05    0.16 
  -7   2   0    1.58    0.15 
   7   2   0    1.42    0.16 
  -7   2   0    1.31    0.15 
  -8  -2   0   94.45    1.68 
  -8   2   0   94.86    1.60 
   8   2   0   93.99    1.55 
  -8   2   0   96.09    1.58 
  -8   2   0   95.39    1.51 
  -9  -2   0   53.66    1.18 
  -9   2   0   56.08    1.05 
  -9   2   0   53.76    1.08 
   9   2   0   54.24    1.07 
  -9   2   0   54.88    1.11 
 -10  -2   0   16.34    0.62 
  10   2   0   16.18    0.54 
 -10   2   0   16.81    0.54 
 -10   2   0   16.25    0.57 
 -11  -2   0    6.86    0.44 
 -11   2   0    6.62    0.39 
  11   2   0    6.74    0.37 
 -12  -2   0   11.64    0.58 
 -12   2   0   10.78    0.52 
 -13  -2   0    1.32    0.29 
 -14  -2   0    4.21    0.46 
   0  -3   0    0.12    0.05 
   0   3   0    0.28    0.05 
  -1  -3   0   89.31    1.29 
  -1   3   0   89.30    1.24 
   1   3   0   90.31    1.25 
  -1   3   0   88.96    1.26 
   2  -3   0   34.29    0.56 
  -2  -3   0   35.56    0.64 
  -2   3   0   35.25    0.58 
   2   3   0   34.93    0.60 
  -3  -3   0   13.51    0.36 
   3  -3   0   13.62    0.31 
   3   3   0   13.51    0.34 
  -3   3   0   13.93    0.32 
   4  -3   0   60.46    0.95 
  -4  -3   0   59.23    1.05 
   4   3   0   61.35    0.98 
  -4   3   0   59.52    0.93 
   5  -3   0   34.89    0.67 
  -5  -3   0   34.77    0.75 
  -5  -3   0   35.94    0.55 
  -5   3   0   34.57    0.64 
   5   3   0   34.94    0.69 
  -6  -3   0   26.82    0.66 
   6   3   0   26.12    0.59 
  -6   3   0   25.86    0.55 
  -6   3   0   25.76    0.61 
  -7  -3   0   40.90    0.91 
  -7   3   0   40.84    0.78 
   7   3   0   39.84    0.82 
  -7   3   0   39.79    0.84 
  -8  -3   0   13.94    0.52 
  -8   3   0   14.26    0.43 
   8   3   0   13.61    0.46 
  -8   3   0   13.92    0.47 
  -9  -3   0    6.65    0.38 
   9   3   0    5.85    0.32 
  -9   3   0    6.22    0.33 
  -9   3   0    6.22    0.30 
 -10  -3   0    7.28    0.42 
 -10   3   0    6.22    0.35 
  10   3   0    7.15    0.37 
 -11  -3   0   11.77    0.56 
 -11   3   0   11.79    0.50 
  11   3   0   11.77    0.49 
 -12  -3   0   13.81    0.65 
 -13  -3   0    0.85    0.26 
 -14  -3   0   13.88    0.72 
   0  -4   0   37.38    0.64 
   0  -4   0   38.28    0.65 
   0   4   0   38.25    0.65 
  -1  -4   0   42.23    0.72 
  -1  -4   0   40.82    0.64 
   1  -4   0   40.85    0.67 
   1   4   0   41.06    0.70 
  -1   4   0   40.12    0.69 
  -1   4   0   40.73    0.69 
  -2  -4   0  125.27    1.82 
   2  -4   0  123.31    1.72 
  -2  -4   0  124.69    1.65 
  -2   4   0  124.92    1.77 
   2   4   0  126.99    1.76 
  -2   4   0  124.25    1.73 
  -3  -4   0  252.60    3.45 
   3  -4   0  257.41    3.33 
  -3   4   0  251.24    3.40 
   3   4   0  250.67    3.33 
  -3   4   0  251.81    3.29 
   4  -4   0   69.70    1.07 
  -4  -4   0   68.97    1.19 
  -4   4   0   68.10    1.14 
   4   4   0   67.21    1.12 
  -4   4   0   68.73    1.07 
  -5  -4   0   12.42    0.42 
   5  -4   0   12.98    0.36 
  -5   4   0   11.66    0.34 
  -5   4   0   11.92    0.38 
   5   4   0   11.62    0.37 
   6  -4   0    3.57    0.21 
  -6  -4   0    3.29    0.24 
  -6   4   0    3.78    0.20 
   6   4   0    3.39    0.22 
  -6   4   0    3.42    0.22 
  -7  -4   0   48.09    1.05 
   7  -4   0   47.76    0.93 
  -7   4   0   48.94    0.99 
   7   4   0   49.70    0.97 
  -7   4   0   48.05    0.90 
   8  -4   0  115.49    1.84 
  -8  -4   0  113.72    1.99 
  -8   4   0  110.90    1.87 
   8   4   0  114.23    1.84 
  -8   4   0  112.92    1.76 
  -9  -4   0   23.64    0.75 
  -9   4   0   24.37    0.70 
   9   4   0   24.67    0.69 
  -9   4   0   26.41    0.65 
 -10  -4   0    7.93    0.46 
 -10   4   0    7.50    0.40 
  10   4   0    8.26    0.41 
 -11  -4   0   14.19    0.64 
  11   4   0   13.97    0.55 
 -11   4   0   14.68    0.57 
 -12  -4   0   21.77    0.84 
 -12   4   0   23.20    0.76 
 -13  -4   0    0.62    0.23 
   0  -5   0   -0.02    0.05 
   0  -5   0    0.11    0.05 
   0   5   0    0.04    0.04 
  -1  -5   0    1.04    0.10 
  -1  -5   0    1.03    0.12 
   1  -5   0    1.22    0.11 
  -1   5   0    1.12    0.11 
  -1   5   0    0.78    0.10 
   1   5   0    0.89    0.11 
  -2  -5   0   26.64    0.59 
   2  -5   0   28.08    0.53 
  -2  -5   0   27.53    0.48 
  -2   5   0   27.75    0.57 
   2   5   0   27.04    0.57 
  -2   5   0   28.21    0.56 
  -3  -5   0   72.33    1.24 
   3  -5   0   73.66    1.13 
  -3  -5   0   72.70    1.03 
  -3   5   0   75.91    1.16 
   3   5   0   73.34    1.20 
  -3   5   0   73.61    1.21 
  -4  -5   0    2.34    0.10 
   4  -5   0    3.23    0.17 
  -4  -5   0    1.55    0.17 
  -4   5   0    2.18    0.15 
   4   5   0    2.35    0.17 
  -4   5   0    1.89    0.18 
  -5  -5   0   45.45    0.95 
   5  -5   0   46.11    0.83 
  -5   5   0   44.52    0.82 
   5   5   0   44.72    0.88 
  -6  -5   0    5.60    0.31 
   6  -5   0    5.14    0.25 
  -6   5   0    5.63    0.28 
   6   5   0    4.40    0.26 
  -6   5   0    5.15    0.24 
  -7  -5   0   38.71    0.94 
   7   5   0   40.81    0.88 
  -7   5   0   39.32    0.80 
  -7   5   0   40.21    0.89 
  -8  -5   0    7.70    0.41 
  -8   5   0    7.20    0.32 
  -8   5   0    8.38    0.40 
   8   5   0    7.73    0.37 
  -9  -5   0    0.37    0.15 
   9   5   0    0.31    0.13 
  -9   5   0    0.70    0.17 
 -10  -5   0   -0.01    0.14 
 -10   5   0    0.02    0.12 
  10   5   0    0.03    0.12 
 -11  -5   0    9.03    0.52 
 -11   5   0    9.73    0.49 
  11   5   0    9.37    0.47 
 -12  -5   0    5.04    0.48 
 -12   5   0    4.12    0.39 
  12   5   0    4.31    0.39 
 -13  -5   0    8.89    0.58 
   0  -6   0   69.97    1.11 
   0  -6   0   69.90    1.13 
   0   6   0   67.68    1.14 
   1  -6   0    0.99    0.12 
  -1  -6   0    0.66    0.11 
  -1  -6   0    0.77    0.09 
   1   6   0    0.62    0.10 
  -1   6   0    0.77    0.11 
  -2  -6   0  156.90    2.30 
  -2  -6   0  157.77    2.13 
   2  -6   0  157.88    2.20 
   2   6   0  156.62    2.25 
  -2   6   0  155.30    2.22 
  -2   6   0  156.60    2.25 
  -3  -6   0   20.36    0.54 
  -3  -6   0   20.28    0.39 
   3  -6   0   20.26    0.46 
  -3   6   0   20.03    0.52 
  -3   6   0   20.16    0.49 
   3   6   0   19.48    0.51 
  -4  -6   0   70.47    1.28 
   4  -6   0   70.22    1.14 
  -4   6   0   70.02    1.24 
  -4   6   0   71.37    1.18 
   4   6   0   71.02    1.23 
  -5  -6   0    3.10    0.24 
  -5   6   0    3.31    0.23 
   5   6   0    3.55    0.23 
  -5   6   0    3.46    0.20 
  -6  -6   0    3.37    0.26 
  -6   6   0    3.07    0.24 
   6   6   0    2.99    0.23 
  -6   6   0    2.78    0.19 
  -7  -6   0   17.80    0.62 
  -7   6   0   17.75    0.58 
   7   6   0   18.00    0.57 
  -7   6   0   18.59    0.52 
  -8  -6   0    0.92    0.20 
   8   6   0    1.33    0.20 
  -8   6   0    1.35    0.21 
  -8   6   0    1.26    0.17 
  -9  -6   0   19.01    0.70 
   9   6   0   19.07    0.64 
  -9   6   0   19.21    0.66 
 -10  -6   0   29.71    0.94 
  10   6   0   28.84    0.84 
 -10   6   0   29.66    0.87 
 -11  -6   0   20.35    0.81 
 -11   6   0   22.43    0.76 
  11   6   0   20.34    0.71 
 -12  -6   0   16.96    0.76 
 -12   6   0   16.60    0.69 
  12   6   0   16.25    0.66 
 -13  -6   0    5.27    0.52 
   0  -7   0    0.05    0.07 
   0  -7   0    0.02    0.05 
   0   7   0   -0.01    0.05 
  -1  -7   0   15.95    0.41 
   1  -7   0   16.49    0.43 
  -1  -7   0   15.65    0.45 
   1  -7   0   16.92    0.46 
   1   7   0   15.46    0.46 
  -1   7   0   15.46    0.45 
  -2  -7   0   37.67    0.67 
   2  -7   0   36.60    0.71 
  -2  -7   0   37.64    0.79 
   2   7   0   35.81    0.78 
  -2   7   0   37.36    0.77 
  -3  -7   0    5.11    0.28 
   3  -7   0    5.01    0.23 
  -3   7   0    4.94    0.25 
  -3   7   0    4.90    0.26 
   3   7   0    5.18    0.28 
  -4  -7   0    3.39    0.24 
   4   7   0    3.31    0.23 
  -4   7   0    3.13    0.23 
  -4   7   0    3.24    0.21 
  -5  -7   0   45.75    1.03 
  -5   7   0   48.83    0.94 
  -5   7   0   49.70    1.02 
   5   7   0   48.27    1.00 
  -6  -7   0    2.62    0.27 
  -6   7   0    2.69    0.26 
  -6   7   0    2.57    0.20 
   6   7   0    2.49    0.25 
  -7  -7   0   28.95    0.84 
  -7   7   0   31.28    0.72 
   7   7   0   28.57    0.77 
  -7   7   0   30.55    0.81 
  -8  -7   0   22.05    0.75 
  -8   7   0   22.42    0.71 
   8   7   0   22.70    0.70 
  -9  -7   0   17.35    0.69 
   9   7   0   17.64    0.63 
  -9   7   0   18.52    0.67 
 -10  -7   0    3.30    0.37 
 -10   7   0    2.66    0.31 
  10   7   0    2.69    0.31 
 -11  -7   0    6.86    0.50 
  11   7   0    8.04    0.46 
 -11   7   0    6.98    0.47 
 -12  -7   0    0.83    0.26 
 -12   7   0    0.76    0.24 
  12   7   0    1.20    0.26 
   0  -8   0   23.47    0.58 
   0  -8   0   23.63    0.57 
   0   8   0   21.97    0.59 
  -1  -8   0   50.63    0.91 
   1  -8   0   50.97    0.94 
  -1  -8   0   49.24    0.97 
   1  -8   0   49.12    0.97 
  -1   8   0   49.57    0.98 
   1   8   0   49.12    1.00 
  -2  -8   0   57.95    0.98 
   2  -8   0   58.12    1.11 
  -2  -8   0   56.51    1.11 
   2   8   0   57.39    1.11 
  -2   8   0   59.25    1.09 
  -3  -8   0   10.31    0.42 
  -3   8   0   10.46    0.39 
   3   8   0   10.98    0.42 
  -4  -8   0    9.23    0.41 
  -4   8   0    8.70    0.36 
  -4   8   0    8.66    0.38 
   4   8   0    7.95    0.38 
  -5  -8   0    1.06    0.20 
  -5   8   0    0.95    0.17 
  -5   8   0    0.97    0.16 
   5   8   0    0.84    0.16 
  -6  -8   0   60.07    1.28 
  -6   8   0   57.60    1.11 
   6   8   0   55.11    1.19 
  -6   8   0   58.66    1.22 
  -7  -8   0    6.39    0.40 
  -7   8   0    6.08    0.37 
   7   8   0    6.23    0.37 
  -7   8   0    6.37    0.33 
  -8  -8   0    5.87    0.40 
   8   8   0    6.02    0.37 
  -8   8   0    6.15    0.38 
  -9  -8   0   25.00    0.87 
  -9   8   0   26.64    0.84 
   9   8   0   26.97    0.83 
 -10  -8   0   25.36    0.90 
  10   8   0   23.55    0.80 
 -10   8   0   24.92    0.84 
 -11  -8   0    3.07    0.39 
  11   8   0    3.29    0.37 
 -12  -8   0    6.35    0.59 
  12   8   0    5.24    0.43 
   0  -9   0   -0.05    0.08 
   0  -9   0   -0.02    0.07 
   0   9   0   -0.06    0.07 
  -1  -9   0   40.89    0.87 
  -1  -9   0   39.52    0.80 
   1  -9   0   40.06    0.87 
  -1   9   0   39.09    0.88 
   1   9   0   37.65    0.88 
   2  -9   0    6.43    0.33 
  -2  -9   0    6.51    0.34 
  -2   9   0    6.34    0.32 
   2   9   0    6.73    0.34 
   3  -9   0    2.21    0.25 
  -3  -9   0    2.37    0.25 
  -3   9   0    2.04    0.22 
   3   9   0    2.27    0.24 
  -4  -9   0   18.12    0.61 
   4  -9   0   17.94    0.61 
   4   9   0   18.39    0.60 
  -4   9   0   18.35    0.56 
  -5  -9   0   40.88    1.01 
  -5   9   0   40.61    0.91 
   5   9   0   40.95    0.99 
  -6  -9   0    3.88    0.36 
   6   9   0    3.90    0.30 
  -6   9   0    3.82    0.27 
  -7  -9   0    2.95    0.33 
   7   9   0    2.80    0.31 
  -7   9   0    2.88    0.31 
  -8  -9   0   31.01    0.95 
  -8   9   0   29.50    0.89 
   8   9   0   30.45    0.89 
  -9  -9   0   22.63    0.84 
   9   9   0   22.72    0.78 
 -10  -9   0    2.74    0.37 
  10   9   0    2.30    0.32 
 -11  -9   0    3.90    0.46 
  11  -9   0    4.12    0.47 
  11   9   0    3.65    0.39 
   0 -10   0   51.52    1.02 
   0  10   0   48.92    1.08 
   1 -10   0   23.46    0.65 
   1  10   0   22.45    0.68 
  -1  10   0   23.28    0.68 
   2 -10   0    1.95    0.24 
  -2 -10   0    2.97    0.28 
  -2  10   0    2.16    0.24 
   2  10   0    1.99    0.24 
   3 -10   0   32.57    0.85 
  -3 -10   0   32.38    0.84 
  -3  10   0   33.68    0.83 
   3  10   0   31.14    0.85 
  -4 -10   0    0.93    0.20 
   4 -10   0    0.78    0.18 
  -4  10   0    0.92    0.17 
   4  10   0    0.75    0.17 
   5 -10   0    9.68    0.48 
  -5 -10   0    9.52    0.47 
   5  10   0    9.30    0.46 
  -5  10   0    8.85    0.41 
   6 -10   0   19.19    0.71 
  -6 -10   0   19.05    0.69 
   6  10   0   19.04    0.68 
  -6  10   0   18.86    0.61 
   7 -10   0    3.26    0.36 
  -7 -10   0    3.11    0.35 
   7  10   0    2.79    0.32 
  -8 -10   0    4.81    0.45 
   8 -10   0    4.52    0.44 
   8  10   0    4.69    0.43 
   9 -10   0   17.25    0.76 
  -9 -10   0   17.54    0.75 
   9  10   0   16.45    0.70 
  10 -10   0   15.42    0.74 
 -10 -10   0   15.16    0.74 
  10  10   0   14.81    0.68 
   0  11   0    0.13    0.12 
   1 -11   0   16.41    0.56 
  -1  11   0   16.45    0.59 
   1  11   0   16.22    0.60 
   2 -11   0    2.49    0.28 
   2  11   0    2.54    0.28 
  -2  11   0    2.40    0.27 
   3 -11   0   16.99    0.61 
   3  11   0   17.60    0.64 
  -3  11   0   17.15    0.60 
   4 -11   0    5.59    0.38 
  -4 -11   0    5.79    0.38 
   4  11   0    6.12    0.39 
  -4  11   0    5.62    0.35 
  -5 -11   0    6.99    0.44 
   5 -11   0    8.19    0.46 
  -5  11   0    7.70    0.41 
   5  11   0    8.40    0.46 
   6 -11   0    3.93    0.40 
  -6 -11   0    3.71    0.38 
   6  11   0    3.95    0.38 
  -6  11   0    4.09    0.30 
   7 -11   0   17.62    0.74 
  -7 -11   0   17.36    0.71 
   7  11   0   17.57    0.70 
   8 -11   0    3.00    0.39 
  -8 -11   0    4.35    0.45 
   8  11   0    4.03    0.41 
   9 -11   0   11.40    0.65 
  -9 -11   0   10.76    0.63 
   9  11   0   10.51    0.59 
 -10 -11   0    1.77    0.36 
  10  11   0    1.27    0.30 
   0  12   0    5.00    0.36 
   1  12   0    3.01    0.32 
  -1  12   0    3.29    0.33 
   2 -12   0   32.22    0.88 
   2  12   0   30.00    0.90 
  -2  12   0   30.27    0.87 
   3 -12   0    4.25    0.33 
   3  12   0    4.30    0.35 
  -3  12   0    4.66    0.35 
   4 -12   0    6.88    0.44 
  -4  12   0    7.29    0.42 
   4  12   0    6.75    0.43 
   5 -12   0    0.97    0.23 
  -5  12   0    0.74    0.20 
   5  12   0    0.93    0.22 
   6 -12   0   11.96    0.60 
  -6 -12   0   10.80    0.57 
   6  12   0   11.63    0.59 
   7 -12   0    7.92    0.53 
  -7 -12   0    7.98    0.52 
   7  12   0    7.86    0.50 
  -8 -12   0   10.42    0.61 
   8 -12   0   10.80    0.63 
   8  12   0   10.95    0.61 
   0  13   0   -0.04    0.14 
   1  13   0   17.44    0.70 
  -1  13   0   17.32    0.67 
   2  13   0    3.09    0.35 
  -2  13   0    3.33    0.35 
   3 -13   0    8.23    0.47 
   3  13   0    8.84    0.51 
  -3  13   0    8.20    0.47 
   4 -13   0    5.76    0.43 
   4  13   0    5.63    0.42 
  -4  13   0    5.60    0.39 
   5 -13   0    0.25    0.19 
   5  13   0    0.29    0.18 
   6 -13   0    8.13    0.53 
   6  13   0    7.46    0.50 
   7 -13   0    6.12    0.50 
   7  13   0    6.69    0.50 
   0  14   0    8.22    0.51 
  -1  14   0    6.01    0.43 
   1  14   0    7.32    0.48 
  -2  14   0   18.07    0.73 
   2  14   0   19.08    0.78 
  -3  14   0    7.84    0.48 
   3  14   0    7.95    0.51 
   4 -14   0   10.03    0.57 
  -4  14   0    9.92    0.53 
   4  14   0    9.84    0.57 
   5 -14   0    1.89    0.34 
   5  14   0    2.31    0.35 
   0  15   0   -0.34    0.14 
  -1  15   0    7.55    0.51 
   1  15   0    8.91    0.55 
   2  15   0    4.49    0.48 
  -2  15   0    3.79    0.41 
  -3  15   0    6.17    0.45 
 -14   0   1    1.51    0.30 
 -13   0   1    7.50    0.49 
 -12   0   1   16.28    0.67 
 -11   0   1   10.56    0.50 
 -10   0   1    1.12    0.20 
  -9   0   1    3.98    0.28 
   9   0  -1    3.53    0.23 
  -9   0   1    3.70    0.23 
  -8   0   1    5.12    0.25 
   8   0  -1    4.94    0.25 
  -8   0   1    5.74    0.31 
  -7   0   1   -0.02    0.06 
   7   0  -1    0.11    0.07 
  -7   0   1    0.10    0.06 
  -6   0   1    2.62    0.18 
  -6   0   1    2.73    0.16 
   6   0  -1    2.33    0.15 
  -5   0   1    1.14    0.13 
  -5   0   1    0.90    0.10 
  -4   0   1   48.06    0.73 
  -4   0   1   46.08    0.81 
  -4   0   1   46.83    0.75 
  -3   0   1   10.66    0.22 
  -3   0   1   10.01    0.26 
  -3   0   1   10.25    0.24 
  -2   0   1   55.96    0.82 
  -3   0  -1   21.62    0.40 
  -3   0  -1   21.38    0.41 
  -3   0  -1   21.42    0.37 
  -4   0  -1    9.45    0.23 
  -4   0  -1    9.80    0.28 
  -4   0  -1    9.69    0.26 
  -5   0  -1   16.74    0.43 
  -5   0  -1   17.49    0.37 
  -5   0  -1   17.63    0.41 
  -6   0  -1   52.03    0.91 
  -6   0  -1   51.47    0.95 
  -6   0  -1   52.27    0.86 
  -7   0  -1   20.85    0.52 
  -7   0  -1   20.44    0.55 
  -7   0  -1   20.16    0.47 
  -8   0  -1    1.37    0.18 
  -8   0  -1    1.74    0.16 
   9   0   1   22.77    0.63 
  -9   0  -1   24.57    0.69 
  10   0   1    0.85    0.16 
 -10   0  -1    0.63    0.16 
  11   0   1   -0.11    0.11 
 -11   0  -1    0.14    0.14 
 -12   0  -1   31.89    0.95 
 -13   0  -1    8.64    0.52 
 -14  -1   1    2.42    0.36 
 -13  -1   1    5.67    0.43 
 -13   1   1    5.80    0.42 
 -12  -1   1    4.91    0.40 
 -12   1   1    4.58    0.36 
 -11  -1   1    8.51    0.47 
 -11   1   1    8.34    0.45 
 -10  -1   1   13.20    0.54 
 -10   1   1   13.80    0.48 
 -10   1   1   12.35    0.51 
  -9  -1   1    8.99    0.43 
   9  -1  -1    8.27    0.34 
  -9   1   1    8.28    0.39 
  -9   1   1    8.95    0.36 
   9   1  -1    8.40    0.35 
  -8  -1   1   28.95    0.62 
  -8  -1   1   29.41    0.76 
   8   1  -1   28.64    0.65 
  -8   1   1   28.13    0.62 
  -8   1   1   29.00    0.72 
  -8   1   1   29.18    0.67 
  -7  -1   1   36.61    0.82 
  -7  -1   1   36.86    0.70 
  -7   1   1   36.21    0.79 
  -7   1   1   36.52    0.70 
   7   1  -1   36.91    0.72 
  -7   1   1   35.45    0.74 
  -6  -1   1   64.91    1.17 
  -6  -1   1   65.43    1.04 
  -6   1   1   67.54    1.04 
  -6   1   1   65.05    1.14 
   6   1  -1   67.51    1.06 
  -6   1   1   65.04    1.09 
  -5  -1   1   93.74    1.35 
  -5  -1   1   94.03    1.48 
  -5   1   1   93.90    1.32 
  -5   1   1   91.64    1.40 
   5   1  -1   93.42    1.35 
  -5   1   1   93.46    1.44 
  -4  -1   1  102.81    1.55 
  -4  -1   1  103.72    1.44 
  -4   1   1  103.16    1.49 
  -4   1   1  104.19    1.41 
   4   1  -1  105.88    1.44 
  -4   1   1  103.51    1.51 
  -3  -1   1   68.87    1.05 
  -3  -1   1   70.36    0.98 
  -3   1   1   68.29    0.94 
   3   1  -1   69.27    0.97 
  -3   1   1   69.84    1.03 
  -3   1   1   68.12    1.02 
   2  -1  -1  304.92    3.90 
  -2  -1   1  304.26    3.92 
  -2   1   1  302.39    3.88 
  -2  -1  -1   23.70    0.44 
  -2   1  -1   23.79    0.40 
   2   1   1   23.04    0.41 
  -2   1  -1   24.00    0.40 
  -3  -1  -1   52.72    0.86 
  -3   1  -1   53.28    0.81 
  -3   1  -1   54.65    0.81 
  -3   1  -1   54.61    0.81 
   3   1   1   53.72    0.83 
  -4  -1  -1  117.41    1.57 
  -4  -1  -1  115.85    1.72 
  -4   1  -1  117.95    1.63 
   4   1   1  118.66    1.66 
  -4   1  -1  117.50    1.67 
  -4   1  -1  119.57    1.65 
  -5  -1  -1    4.54    0.16 
  -5  -1  -1    4.68    0.22 
  -5   1  -1    4.53    0.19 
   5   1   1    4.42    0.20 
  -5   1  -1    4.18    0.18 
  -5   1  -1    4.24    0.19 
  -6  -1  -1   14.46    0.43 
  -6  -1  -1   13.73    0.32 
  -6   1  -1   13.65    0.38 
  -6   1  -1   13.83    0.39 
  -6   1  -1   13.88    0.37 
   6   1   1   13.95    0.40 
  -7  -1  -1   32.17    0.62 
  -7  -1  -1   34.98    0.78 
  -7   1  -1   32.94    0.68 
  -7   1  -1   33.56    0.73 
  -7   1  -1   33.33    0.70 
   7   1   1   34.67    0.73 
  -8  -1  -1   57.69    1.16 
  -8   1  -1   59.42    1.08 
  -8   1  -1   56.90    1.04 
  -8   1  -1   58.86    1.12 
   8   1   1   58.38    1.09 
  -9  -1  -1   23.96    0.70 
  -9   1  -1   22.88    0.65 
   9   1   1   23.16    0.63 
  -9   1  -1   22.18    0.61 
  -9   1  -1   23.27    0.59 
 -10  -1  -1    6.03    0.37 
  10   1   1    5.61    0.32 
 -10   1  -1    5.45    0.34 
 -11  -1  -1   16.30    0.64 
  11   1   1   17.44    0.59 
 -11   1  -1   17.81    0.64 
 -12  -1  -1    2.20    0.31 
 -12   1  -1    2.43    0.30 
 -13  -1  -1   19.66    0.78 
 -14  -1  -1    0.55    0.24 
 -14  -2   1   -0.06    0.19 
 -13  -2   1    5.26    0.49 
 -12  -2   1    5.29    0.41 
 -11  -2   1    7.82    0.46 
 -11   2   1    8.19    0.44 
 -11   2   1    8.27    0.41 
 -10  -2   1    2.77    0.31 
 -10   2   1    2.16    0.25 
  10   2  -1    2.94    0.24 
 -10   2   1    2.46    0.26 
  -9  -2   1   46.76    1.10 
   9   2  -1   49.21    0.98 
  -9   2   1   48.53    1.01 
  -9   2   1   50.35    1.05 
  -8  -2   1   26.75    0.72 
  -8   2   1   25.28    0.58 
  -8   2   1   25.69    0.65 
   8   2  -1   26.52    0.63 
  -8   2   1   25.59    0.66 
  -7  -2   1    7.53    0.34 
  -7  -2   1    7.57    0.25 
  -7   2   1    6.99    0.30 
   7   2  -1    7.72    0.30 
  -7   2   1    7.53    0.27 
  -7   2   1    7.09    0.30 
  -6  -2   1   21.67    0.45 
  -6  -2   1   22.63    0.58 
   6   2  -1   21.79    0.50 
  -6   2   1   21.95    0.47 
  -6   2   1   21.64    0.53 
  -6   2   1   21.81    0.53 
  -5  -2   1    0.95    0.12 
  -5  -2   1    1.55    0.10 
   5   2  -1    0.99    0.11 
  -5   2   1    0.99    0.11 
  -5   2   1    1.04    0.10 
  -5   2   1    1.09    0.12 
  -4  -2   1  109.27    1.66 
  -4  -2   1  113.56    1.52 
   4  -2  -1  110.94    1.62 
   4   2  -1  113.99    1.57 
  -4   2   1  111.13    1.51 
  -4   2   1  110.33    1.62 
  -3  -2   1   40.30    0.71 
   3  -2  -1   39.94    0.67 
  -3  -2   1   40.65    0.61 
   3   2  -1   40.20    0.65 
  -3   2   1   39.02    0.68 
  -3   2   1   40.30    0.61 
  -2  -2   1    7.73    0.22 
   2  -2  -1    7.98    0.21 
  -2   2   1    8.28    0.22 
   2   2  -1    8.29    0.21 
  -1   2   1   57.22    0.84 
   1   2  -1   59.16    0.83 
   0   2  -1  502.13    6.28 
  -1  -2  -1  152.65    2.05 
   1  -2   1  150.40    2.01 
  -1   2  -1  151.60    1.96 
   1   2   1  151.61    1.96 
  -2  -2  -1   73.14    1.11 
  -2   2  -1   72.97    1.04 
  -2   2  -1   73.81    1.07 
   2   2   1   76.07    1.06 
  -3  -2  -1  261.18    3.51 
  -3   2  -1  261.49    3.43 
  -3   2  -1  265.89    3.38 
  -3   2  -1  259.11    3.35 
   3   2   1  264.18    3.38 
  -4  -2  -1  165.20    2.40 
  -4   2  -1  169.76    2.32 
  -4   2  -1  171.51    2.29 
   4   2   1  170.76    2.30 
  -4   2  -1  168.10    2.26 
  -5  -2  -1   14.57    0.28 
  -5  -2  -1   14.05    0.41 
  -5   2  -1   13.53    0.36 
  -5   2  -1   14.38    0.37 
   5   2   1   14.03    0.38 
  -5   2  -1   14.47    0.36 
  -6  -2  -1    1.14    0.09 
  -6  -2  -1    1.25    0.15 
  -6   2  -1    1.20    0.13 
   6   2   1    1.06    0.13 
  -6   2  -1    1.41    0.14 
  -6   2  -1    1.16    0.13 
  -7  -2  -1    9.07    0.37 
   7   2   1    9.19    0.34 
  -7   2  -1    8.59    0.32 
  -7   2  -1    9.27    0.33 
  -7   2  -1    9.18    0.33 
  -8  -2  -1    6.87    0.35 
  -8   2  -1    6.38    0.30 
  -8   2  -1    7.31    0.31 
  -8   2  -1    7.11    0.30 
   8   2   1    6.91    0.32 
  -9  -2  -1    0.01    0.11 
   9   2   1    0.12    0.10 
  -9   2  -1    0.14    0.09 
  -9   2  -1    0.01    0.08 
  -9   2  -1    0.06    0.09 
 -10  -2  -1   14.96    0.59 
 -10   2  -1   14.97    0.54 
 -10   2  -1   14.79    0.50 
  10   2   1   14.18    0.51 
 -10   2  -1   15.20    0.52 
 -11  -2  -1    1.81    0.27 
 -11   2  -1    1.86    0.25 
  11   2   1    1.58    0.23 
 -12  -2  -1    7.69    0.49 
 -13  -2  -1   12.34    0.64 
 -14  -2  -1    5.94    0.49 
 -14  -3   1    3.40    0.43 
 -13  -3   1   10.12    0.59 
 -12  -3   1    3.34    0.38 
 -11  -3   1    3.87    0.39 
  11  -3  -1    4.11    0.34 
 -11   3   1    4.82    0.34 
 -10  -3   1    8.70    0.47 
  10  -3  -1    8.88    0.43 
  10   3  -1    8.57    0.39 
 -10   3   1    8.50    0.42 
  -9  -3   1   58.64    1.28 
   9  -3  -1   57.26    1.19 
   9   3  -1   59.56    1.14 
  -9   3   1   60.52    1.20 
   8  -3  -1   34.47    0.81 
  -8  -3   1   36.10    0.89 
  -8   3   1   34.89    0.71 
   8   3  -1   35.50    0.78 
  -8   3   1   34.83    0.81 
  -7  -3   1    7.90    0.36 
   7  -3  -1    8.18    0.34 
  -7   3   1    7.52    0.27 
  -7   3   1    7.77    0.33 
   7   3  -1    7.99    0.32 
   6  -3  -1   73.61    1.25 
  -6  -3   1   72.53    1.32 
  -6  -3   1   76.07    1.11 
  -6   3   1   74.22    1.15 
   6   3  -1   74.41    1.22 
  -6   3   1   73.37    1.26 
  -5  -3   1   56.54    1.05 
   5  -3  -1   56.98    0.99 
  -5  -3   1   59.30    0.88 
  -5   3   1   57.73    1.02 
   5   3  -1   58.32    0.98 
  -5   3   1   58.41    0.91 
   4  -3  -1  130.18    1.86 
  -4  -3   1  129.53    1.73 
  -4  -3   1  127.13    1.91 
  -4   3   1  130.25    1.75 
  -4   3   1  127.38    1.88 
   4   3  -1  130.29    1.82 
  -3  -3   1   11.49    0.32 
   3  -3  -1   11.69    0.30 
  -3  -3   1   11.44    0.24 
   3   3  -1   11.24    0.30 
  -3   3   1   11.73    0.27 
  -3   3   1   11.07    0.31 
   2  -3  -1  114.85    1.63 
  -2  -3   1  117.91    1.67 
  -2  -3   1  116.58    1.57 
  -2   3   1  120.03    1.65 
   2   3  -1  118.36    1.62 
  -2   3   1  117.56    1.57 
  -1  -3   1    9.42    0.24 
   1  -3  -1    9.51    0.24 
  -1  -3   1    9.43    0.22 
  -1   3   1    9.53    0.23 
   1   3  -1   10.13    0.25 
  -1   3   1    9.50    0.24 
   0  -3  -1   79.90    1.17 
   0  -3   1   80.05    1.14 
   0   3   1   79.87    1.10 
   0   3  -1   80.37    1.14 
   0   3   1   78.72    1.11 
  -1  -3  -1   95.13    1.38 
   1  -3   1   94.96    1.35 
   1   3   1   94.81    1.32 
  -1   3  -1   93.60    1.32 
  -2  -3  -1   45.81    0.80 
   2   3   1   46.35    0.75 
  -2   3  -1   46.05    0.75 
  -2   3  -1   46.40    0.74 
   3  -3   1  145.91    1.92 
  -3  -3  -1  144.53    2.08 
  -3   3  -1  144.45    2.01 
  -3   3  -1  141.76    1.95 
   3   3   1  142.79    1.98 
  -4  -3  -1   42.60    0.82 
   4  -3   1   42.80    0.70 
  -4   3  -1   41.92    0.77 
  -4   3  -1   42.02    0.73 
   4   3   1   42.29    0.76 
  -5  -3  -1   46.76    0.93 
  -5   3  -1   48.66    0.88 
  -5   3  -1   48.77    0.81 
   5   3   1   48.76    0.88 
  -5   3  -1   48.20    0.84 
  -6  -3  -1   33.04    0.76 
   6   3   1   33.24    0.70 
  -6   3  -1   31.60    0.69 
  -6   3  -1   32.91    0.66 
  -6   3  -1   32.15    0.64 
  -7  -3  -1   13.93    0.48 
   7   3   1   13.89    0.44 
  -7   3  -1   13.63    0.40 
  -7   3  -1   12.95    0.42 
  -7   3  -1   13.66    0.41 
  -8  -3  -1   11.60    0.48 
  -8   3  -1   13.04    0.42 
  -8   3  -1   13.27    0.45 
  -8   3  -1   12.55    0.41 
   8   3   1   13.55    0.46 
  -9  -3  -1   18.33    0.64 
  -9   3  -1   18.24    0.56 
  -9   3  -1   17.64    0.53 
   9   3   1   19.08    0.58 
  -9   3  -1   19.47    0.56 
 -10  -3  -1   12.89    0.56 
 -10   3  -1   12.52    0.47 
 -10   3  -1   12.86    0.49 
  10   3   1   13.69    0.51 
 -11  -3  -1   15.90    0.65 
  11   3   1   16.37    0.59 
 -11   3  -1   15.99    0.58 
 -12  -3  -1    5.29    0.42 
  12   3   1    4.97    0.36 
 -13  -3  -1    4.07    0.43 
 -14  -3  -1    2.25    0.36 
 -13  -4   1    8.55    0.57 
 -12  -4   1    1.46    0.28 
 -12   4   1    1.80    0.28 
 -11  -4   1    3.70    0.39 
 -11   4   1    3.93    0.31 
 -10  -4   1   25.97    0.83 
 -10   4   1   25.77    0.76 
  10   4  -1   26.29    0.73 
   9  -4  -1   31.59    0.81 
  -9  -4   1   32.22    0.90 
  -9   4   1   33.45    0.85 
   9   4  -1   32.67    0.80 
  -8  -4   1    0.71    0.17 
   8  -4  -1    1.09    0.18 
   8   4  -1    1.07    0.17 
  -8   4   1    1.20    0.18 
   7  -4  -1   24.24    0.62 
  -7  -4   1   24.33    0.69 
  -7   4   1   24.47    0.55 
  -7   4   1   24.13    0.64 
   7   4  -1   24.15    0.61 
  -6  -4   1  100.19    1.70 
   6  -4  -1  102.11    1.61 
  -6   4   1  101.30    1.65 
  -6   4   1  101.50    1.50 
   6   4  -1   99.23    1.58 
  -5  -4   1   12.81    0.28 
   5  -4  -1   12.44    0.37 
  -5  -4   1   12.51    0.42 
  -5   4   1   11.91    0.32 
   5   4  -1   12.23    0.37 
  -5   4   1   12.17    0.39 
  -4  -4   1   51.68    0.76 
   4  -4  -1   49.68    0.86 
  -4  -4   1   48.43    0.92 
  -4   4   1   51.03    0.82 
   4   4  -1   48.98    0.87 
   3  -4  -1   69.32    1.08 
  -3  -4   1   67.30    0.98 
  -3  -4   1   69.96    1.14 
   3   4  -1   67.84    1.08 
  -3   4   1   67.20    1.11 
  -3   4   1   69.75    1.04 
   2  -4  -1   26.93    0.51 
  -2  -4   1   25.72    0.53 
  -2  -4   1   26.22    0.46 
   2   4  -1   26.31    0.53 
  -2   4   1   26.90    0.49 
  -2   4   1   25.83    0.52 
  -1  -4   1   84.08    1.20 
  -1  -4   1   85.02    1.24 
   1  -4  -1   83.63    1.25 
  -1   4   1   83.36    1.23 
   1   4  -1   81.79    1.23 
  -1   4   1   84.87    1.21 
   0  -4   1  132.47    1.79 
   0  -4  -1  131.31    1.86 
   0  -4   1  129.74    1.82 
   0   4  -1  132.76    1.82 
   0   4   1  131.30    1.78 
   0   4   1  132.32    1.80 
  -1  -4  -1   50.32    0.85 
   1  -4   1   48.74    0.82 
  -1   4  -1   48.09    0.80 
   1   4   1   49.05    0.80 
  -2  -4  -1   13.70    0.37 
  -2   4  -1   13.45    0.34 
  -2   4  -1   13.45    0.34 
   2   4   1   13.11    0.34 
  -3  -4  -1   86.96    1.40 
   3  -4   1   86.04    1.22 
   3   4   1   86.68    1.32 
  -3   4  -1   86.15    1.29 
   4  -4   1   86.10    1.24 
  -4  -4  -1   82.46    1.40 
   4   4   1   84.09    1.33 
  -4   4  -1   86.58    1.36 
  -4   4  -1   85.92    1.30 
   5  -4   1    9.81    0.29 
  -5  -4  -1    8.81    0.35 
  -5   4  -1    9.35    0.31 
   5   4   1    8.44    0.32 
  -5   4  -1    9.45    0.33 
  -6  -4  -1   42.14    0.92 
   6  -4   1   43.04    0.79 
   6   4   1   41.53    0.85 
  -6   4  -1   40.66    0.80 
  -6   4  -1   41.56    0.85 
   7  -4   1   56.76    1.01 
  -7  -4  -1   54.48    1.14 
  -7   4  -1   54.06    1.00 
   7   4   1   53.20    1.05 
  -7   4  -1   54.63    1.06 
  -8  -4  -1   19.53    0.64 
  -8   4  -1   19.59    0.54 
   8   4   1   18.44    0.57 
  -8   4  -1   19.15    0.58 
  -9  -4  -1    0.07    0.12 
  -9   4  -1   -0.06    0.11 
  -9   4  -1    0.05    0.08 
   9   4   1    0.37    0.13 
 -10  -4  -1    4.99    0.37 
 -10   4  -1    5.28    0.34 
  10   4   1    5.69    0.35 
 -11  -4  -1   14.59    0.65 
  11   4   1   14.90    0.58 
 -11   4  -1   15.33    0.58 
 -12  -4  -1    0.82    0.23 
  12   4   1    1.06    0.23 
 -13  -4  -1    1.64    0.32 
 -13  -5   1    2.66    0.38 
 -13   5   1    2.71    0.35 
 -12  -5   1    1.38    0.29 
 -12   5   1    0.75    0.22 
 -11  -5   1    0.66    0.22 
  11   5  -1    0.61    0.18 
 -11   5   1    1.11    0.23 
 -10  -5   1    6.91    0.44 
  10   5  -1    8.45    0.41 
 -10   5   1    7.30    0.41 
  -9  -5   1    7.40    0.42 
  -9   5   1    6.96    0.39 
   9   5  -1    7.26    0.37 
  -8  -5   1   25.93    0.77 
   8  -5  -1   26.25    0.69 
   8   5  -1   25.58    0.69 
  -8   5   1   26.60    0.74 
   7  -5  -1   40.60    0.86 
  -7  -5   1   40.85    0.97 
   7   5  -1   40.55    0.88 
  -7   5   1   40.71    0.92 
  -7   5   1   40.83    0.79 
   6  -5  -1   25.72    0.61 
  -6  -5   1   24.13    0.67 
   6   5  -1   24.63    0.62 
  -6   5   1   24.54    0.65 
  -6   5   1   24.72    0.55 
  -5  -5   1   56.06    1.08 
   5  -5  -1   56.79    0.99 
  -5   5   1   54.94    1.05 
   5   5  -1   54.04    1.01 
  -5   5   1   55.02    0.93 
  -4  -5   1  112.01    1.54 
   4  -5  -1  113.36    1.68 
  -4  -5   1  110.63    1.76 
   4   5  -1  112.49    1.70 
  -4   5   1  111.40    1.74 
  -4   5   1  111.89    1.62 
   3  -5  -1    6.97    0.26 
  -3  -5   1    7.49    0.21 
  -3  -5   1    7.10    0.29 
  -3   5   1    6.48    0.27 
  -3   5   1    7.24    0.25 
   3   5  -1    6.26    0.26 
   2  -5  -1   43.80    0.78 
  -2  -5   1   44.63    0.80 
  -2  -5   1   43.61    0.71 
  -2   5   1   43.04    0.75 
  -2   5   1   43.69    0.79 
   2   5  -1   43.31    0.80 
   1  -5  -1   21.54    0.48 
  -1  -5   1   21.71    0.47 
  -1  -5   1   20.72    0.44 
  -1   5   1   22.09    0.46 
   1   5  -1   20.96    0.48 
  -1   5   1   20.70    0.46 
   0  -5   1    1.68    0.12 
   0  -5   1    1.71    0.12 
   0  -5  -1    1.82    0.15 
   0   5   1    1.71    0.12 
   0   5   1    1.73    0.12 
   0   5  -1    1.71    0.13 
  -1  -5  -1   46.98    0.75 
  -1  -5  -1   47.29    0.86 
   1  -5   1   47.70    0.83 
   1  -5   1   47.51    0.75 
   1   5   1   45.04    0.81 
  -1   5  -1   45.98    0.82 
   2  -5   1   50.25    0.92 
  -2  -5  -1   52.69    0.77 
  -2  -5  -1   50.35    0.94 
   2  -5   1   52.49    0.80 
  -2   5  -1   52.46    0.89 
   2   5   1   51.17    0.89 
   3  -5   1   24.12    0.45 
  -3  -5  -1   22.80    0.57 
  -3   5  -1   23.97    0.54 
  -3   5  -1   22.94    0.52 
   3   5   1   22.08    0.53 
   4  -5   1   60.22    0.94 
  -4  -5  -1   58.83    1.11 
  -4   5  -1   60.01    1.02 
   4   5   1   58.88    1.05 
  -4   5  -1   59.48    1.06 
  -5  -5  -1   59.79    1.16 
   5  -5   1   62.25    0.99 
  -5   5  -1   59.84    1.10 
   5   5   1   59.63    1.09 
  -5   5  -1   60.43    1.05 
  -6  -5  -1   58.11    1.18 
  -6   5  -1   57.67    1.04 
  -6   5  -1   58.94    1.12 
  -7  -5  -1    0.15    0.11 
  -7   5  -1    0.04    0.07 
   7   5   1    0.35    0.12 
  -7   5  -1    0.30    0.10 
  -8  -5  -1    4.46    0.33 
  -8   5  -1    4.79    0.30 
  -8   5  -1    4.79    0.27 
   8   5   1    4.43    0.29 
  -9  -5  -1    2.48    0.29 
   9   5   1    2.80    0.28 
  -9   5  -1    2.92    0.24 
  -9   5  -1    3.17    0.26 
 -10  -5  -1    9.36    0.50 
  10   5   1    8.87    0.44 
 -10   5  -1    9.57    0.46 
 -11  -5  -1   16.47    0.70 
  11   5   1   17.24    0.64 
 -11   5  -1   16.32    0.63 
 -12  -5  -1   15.52    0.71 
  12   5   1   15.86    0.64 
 -13  -5  -1    1.32    0.29 
 -13  -6   1    7.40    0.55 
 -13   6   1    7.55    0.51 
 -12  -6   1   10.03    0.59 
 -12   6   1   10.01    0.55 
 -11  -6   1    3.69    0.40 
 -11   6   1    3.36    0.36 
  11   6  -1    3.53    0.34 
 -10  -6   1   24.95    0.86 
  10   6  -1   26.68    0.78 
 -10   6   1   25.30    0.81 
  -9  -6   1    9.27    0.48 
  -9   6   1    8.83    0.45 
   9   6  -1    9.73    0.44 
  -8  -6   1    0.73    0.19 
  -8   6   1    0.78    0.17 
   8   6  -1    0.44    0.14 
  -7  -6   1   11.16    0.48 
  -7   6   1   11.05    0.37 
   7   6  -1   11.08    0.43 
  -7   6   1   11.34    0.46 
   6  -6  -1   80.87    1.36 
  -6  -6   1   76.45    1.46 
   6   6  -1   78.37    1.39 
  -6   6   1   78.34    1.28 
   5  -6  -1   16.97    0.47 
  -5  -6   1   17.07    0.53 
  -5   6   1   15.94    0.51 
  -5   6   1   16.35    0.44 
   5   6  -1   17.01    0.50 
  -4  -6   1   58.22    1.11 
   4  -6  -1   59.21    1.03 
  -4   6   1   58.51    1.08 
  -4   6   1   57.61    0.99 
   4   6  -1   57.29    1.06 
   3  -6  -1   55.64    0.98 
  -3  -6   1   56.60    1.04 
  -3  -6   1   56.95    0.89 
  -3   6   1   55.93    1.02 
  -3   6   1   57.68    0.97 
   3   6  -1   56.55    1.03 
   2  -6  -1    0.47    0.10 
  -2  -6   1    0.48    0.10 
  -2  -6   1    0.38    0.07 
  -2   6   1    0.44    0.09 
  -2   6   1    0.55    0.10 
   2   6  -1    0.31    0.09 
  -1  -6   1   24.17    0.53 
  -1  -6   1   25.20    0.51 
   1  -6  -1   24.14    0.55 
  -1   6   1   23.39    0.52 
   1   6  -1   24.81    0.57 
  -1   6   1   23.79    0.53 
   0  -6   1   11.35    0.32 
   0  -6   1   10.91    0.33 
   0  -6  -1   10.79    0.35 
   0   6   1   11.16    0.31 
   0   6   1   10.77    0.34 
   0   6  -1   11.53    0.35 
  -1  -6  -1    9.65    0.27 
   1  -6   1    9.24    0.27 
   1  -6   1    8.96    0.31 
  -1  -6  -1    9.57    0.34 
  -1   6  -1    8.83    0.31 
   1   6   1    8.71    0.31 
   2  -6   1    4.92    0.19 
  -2  -6  -1    4.66    0.25 
   2  -6   1    4.64    0.24 
  -2  -6  -1    4.58    0.17 
  -2   6  -1    4.83    0.23 
   2   6   1    4.87    0.23 
  -3  -6  -1   58.86    1.11 
   3  -6   1   60.55    0.94 
   3   6   1   59.84    1.06 
  -3   6  -1   58.64    1.03 
  -4  -6  -1    9.99    0.39 
  -4   6  -1    9.43    0.36 
  -4   6  -1    9.93    0.34 
   4   6   1    9.78    0.36 
  -5  -6  -1    7.02    0.35 
   5   6   1    7.19    0.32 
  -5   6  -1    6.85    0.29 
  -5   6  -1    6.89    0.32 
  -6  -6  -1   42.95    1.00 
   6   6   1   44.15    0.94 
  -6   6  -1   44.17    0.95 
  -6   6  -1   42.79    0.87 
  -7  -6  -1   21.21    0.67 
  -7   6  -1   20.73    0.57 
  -7   6  -1   20.54    0.63 
   7   6   1   20.23    0.61 
  -8  -6  -1   15.16    0.60 
   8   6   1   15.99    0.56 
  -8   6  -1   15.57    0.50 
  -8   6  -1   15.06    0.55 
  -9  -6  -1   11.74    0.55 
   9   6   1   11.59    0.50 
  -9   6  -1   11.53    0.45 
  -9   6  -1   12.33    0.52 
 -10  -6  -1    4.47    0.42 
 -10   6  -1    4.41    0.35 
  10   6   1    4.83    0.34 
 -11  -6  -1   17.87    0.75 
  11   6   1   16.15    0.64 
 -12  -6  -1   11.85    0.64 
  12   6   1   11.00    0.56 
 -13  -6  -1    2.21    0.38 
  13  -6   1    1.82    0.34 
  13   6   1    2.00    0.32 
 -12  -7   1    2.36    0.36 
 -12   7   1    3.27    0.39 
 -11  -7   1    3.90    0.43 
  11   7  -1    4.11    0.39 
 -11   7   1    3.24    0.36 
 -10  -7   1    2.18    0.32 
  10   7  -1    2.85    0.32 
 -10   7   1    2.16    0.29 
  -9  -7   1    5.64    0.41 
  -9   7   1    6.20    0.40 
   9   7  -1    6.54    0.39 
  -8  -7   1    5.62    0.38 
  -8   7   1    5.48    0.36 
   8   7  -1    5.70    0.34 
  -7  -7   1    5.73    0.36 
  -7   7   1    5.47    0.34 
   7   7  -1    5.40    0.33 
  -6  -7   1    3.39    0.27 
  -6   7   1    2.65    0.26 
   6   7  -1    3.08    0.25 
  -6   7   1    3.06    0.21 
  -5  -7   1   27.52    0.73 
  -5   7   1   28.71    0.73 
   5   7  -1   28.29    0.71 
  -5   7   1   27.76    0.64 
  -4  -7   1    6.38    0.32 
   4  -7  -1    6.88    0.30 
  -4   7   1    7.03    0.32 
  -4   7   1    6.38    0.28 
   4   7  -1    6.32    0.31 
  -3  -7   1   56.43    0.92 
   3  -7  -1   56.52    1.02 
  -3  -7   1   57.61    1.08 
  -3   7   1   56.00    1.01 
  -3   7   1   57.78    1.06 
   3   7  -1   55.59    1.07 
   2  -7  -1   58.10    1.05 
  -2  -7   1   60.02    0.99 
  -2  -7   1   58.91    1.07 
  -2   7   1   59.43    1.05 
  -2   7   1   60.43    1.07 
   2   7  -1   60.68    1.10 
  -1  -7   1    4.93    0.24 
   1  -7  -1    5.02    0.25 
  -1  -7   1    5.07    0.22 
  -1   7   1    5.02    0.24 
   1   7  -1    4.98    0.26 
  -1   7   1    4.94    0.23 
   0  -7  -1   20.52    0.49 
   0  -7   1   21.29    0.51 
   0  -7   1   21.02    0.49 
   0  -7  -1   20.71    0.53 
   0   7   1   20.03    0.52 
   0   7  -1   20.66    0.54 
   1  -7   1    8.35    0.28 
   1  -7   1    9.07    0.33 
  -1  -7  -1    8.80    0.28 
  -1  -7  -1    8.40    0.34 
   1   7   1    9.17    0.34 
  -1   7  -1    9.45    0.35 
  -2  -7  -1   13.96    0.34 
  -2  -7  -1   14.65    0.46 
   2  -7   1   13.78    0.44 
   2   7   1   12.97    0.42 
  -2   7  -1   14.02    0.43 
   3  -7   1   34.58    0.79 
  -3  -7  -1   34.68    0.80 
   3   7   1   33.61    0.75 
  -3   7  -1   35.16    0.75 
  -4  -7  -1   37.19    0.87 
  -4   7  -1   36.46    0.78 
   4   7   1   37.13    0.82 
  -5  -7  -1   46.68    1.04 
  -5   7  -1   47.69    1.00 
  -5   7  -1   45.88    0.93 
   5   7   1   46.69    0.98 
  -6  -7  -1   24.20    0.73 
   6   7   1   23.80    0.68 
  -6   7  -1   25.02    0.69 
  -6   7  -1   23.59    0.62 
  -7  -7  -1   11.15    0.50 
  -7   7  -1   11.48    0.42 
  -7   7  -1   11.38    0.47 
   7   7   1   11.77    0.47 
  -8  -7  -1    0.42    0.16 
   8   7   1    0.76    0.17 
  -8   7  -1    0.46    0.16 
  -8   7  -1    0.52    0.14 
  -9  -7  -1    0.57    0.20 
  -9   7  -1    0.34    0.16 
   9   7   1    0.63    0.18 
 -10  -7  -1    0.70    0.22 
  10   7   1    0.65    0.20 
 -11  -7  -1    6.62    0.49 
  11   7   1    5.65    0.40 
  12  -7   1    0.54    0.23 
 -12  -7  -1    0.65    0.24 
  12   7   1    0.41    0.20 
 -12  -8   1   19.20    0.86 
 -12   8   1   17.30    0.77 
 -11  -8   1    2.93    0.39 
 -11   8   1    2.49    0.34 
  11   8  -1    2.97    0.35 
 -10  -8   1    3.56    0.40 
  10   8  -1    4.16    0.39 
 -10   8   1    4.81    0.40 
  -9  -8   1    0.69    0.21 
  -9   8   1    1.30    0.25 
   9   8  -1    0.82    0.19 
  -8  -8   1   15.51    0.64 
   8   8  -1   16.53    0.61 
  -8   8   1   15.87    0.62 
  -7  -8   1   11.41    0.53 
   7   8  -1   11.80    0.49 
  -7   8   1   11.57    0.50 
  -6  -8   1    7.68    0.40 
  -6   8   1    7.19    0.39 
  -6   8   1    7.54    0.33 
   6   8  -1    6.97    0.37 
  -5  -8   1    4.24    0.30 
   5   8  -1    4.05    0.28 
  -5   8   1    3.79    0.27 
  -5   8   1    4.11    0.25 
  -4  -8   1   47.30    1.02 
  -4   8   1   47.39    1.00 
  -4   8   1   46.45    0.93 
   4   8  -1   45.75    1.00 
  -3  -8   1    4.85    0.29 
  -3   8   1    4.45    0.25 
   3   8  -1    4.72    0.28 
  -3   8   1    5.18    0.28 
   2  -8  -1   15.90    0.47 
  -2  -8   1   15.92    0.42 
  -2  -8   1   15.31    0.47 
   2   8  -1   15.21    0.49 
  -2   8   1   15.77    0.47 
  -2   8   1   15.26    0.46 
   1  -8  -1    1.61    0.18 
  -1  -8   1    1.70    0.18 
   1  -8  -1    1.60    0.17 
  -1  -8   1    1.99    0.18 
   1   8  -1    2.39    0.23 
  -1   8   1    2.13    0.20 
   0  -8   1   39.31    0.80 
   0  -8  -1   39.56    0.79 
   0  -8   1   40.80    0.79 
   0  -8  -1   38.09    0.83 
   0   8  -1   38.07    0.84 
   0   8   1   38.33    0.83 
  -1  -8  -1    8.53    0.36 
  -1  -8  -1    8.59    0.30 
   1  -8   1    9.00    0.35 
  -1   8  -1    8.48    0.35 
   1   8   1    8.71    0.36 
  -2  -8  -1   29.15    0.73 
   2  -8   1   28.44    0.70 
   2   8   1   28.19    0.70 
  -2   8  -1   28.48    0.70 
  -3  -8  -1   80.93    1.48 
   3  -8   1   81.22    1.46 
  -3   8  -1   79.47    1.40 
   3   8   1   81.11    1.44 
  -4  -8  -1    1.06    0.19 
   4  -8   1    1.27    0.20 
  -4   8  -1    1.32    0.18 
   4   8   1    0.98    0.16 
  -5  -8  -1    6.02    0.36 
   5  -8   1    6.39    0.36 
  -5   8  -1    6.41    0.32 
   5   8   1    6.90    0.35 
  -6  -8  -1   17.72    0.64 
   6   8   1   17.28    0.59 
  -6   8  -1   17.37    0.54 
  -7  -8  -1   -0.02    0.12 
   7   8   1    0.00    0.10 
  -7   8  -1    0.06    0.10 
  -8  -8  -1    8.94    0.49 
   8   8   1    9.07    0.46 
  -8   8  -1    8.82    0.41 
  -9  -8  -1    0.42    0.19 
   9   8   1    0.41    0.16 
  10  -8   1    0.29    0.19 
 -10  -8  -1    0.54    0.21 
  10   8   1    0.27    0.17 
 -11  -8  -1    6.74    0.50 
  11  -8   1    7.95    0.52 
  11   8   1    8.19    0.49 
 -12  -8  -1   10.61    0.66 
  12  -8   1   11.31    0.65 
  12   8   1   11.11    0.59 
 -11  -9   1    4.14    0.47 
  11   9  -1    4.64    0.44 
 -11   9   1    3.96    0.44 
 -10  -9   1    7.46    0.51 
  10   9  -1    6.80    0.46 
 -10   9   1    7.11    0.48 
  -9  -9   1    3.91    0.41 
  -9   9   1    4.17    0.41 
   9   9  -1    3.47    0.37 
  -8  -9   1    1.09    0.23 
  -8   9   1    1.43    0.24 
   8   9  -1    1.15    0.23 
  -7  -9   1    3.26    0.34 
   7   9  -1    3.24    0.33 
  -7   9   1    3.19    0.33 
  -6  -9   1   13.94    0.57 
   6   9  -1   12.80    0.53 
  -6   9   1   13.95    0.48 
  -6   9   1   14.32    0.56 
  -5  -9   1   14.84    0.56 
  -5   9   1   14.79    0.55 
   5   9  -1   16.16    0.58 
  -5   9   1   15.38    0.50 
  -4  -9   1   21.83    0.66 
  -4   9   1   21.23    0.60 
  -4   9   1   21.44    0.64 
   4   9  -1   22.21    0.67 
  -3  -9   1   20.72    0.61 
  -3   9   1   20.74    0.59 
  -3   9   1   19.90    0.59 
   3   9  -1   20.75    0.64 
  -2  -9   1   47.74    0.98 
   2  -9  -1   47.43    1.00 
  -2   9   1   47.71    0.99 
   2   9  -1   47.91    1.04 
   1  -9  -1    7.38    0.34 
   1  -9  -1    6.80    0.32 
  -1  -9   1    6.66    0.30 
  -1   9   1    6.98    0.33 
   1   9  -1    6.94    0.35 
   0  -9  -1   22.20    0.57 
   0  -9   1   21.98    0.58 
   0  -9  -1   22.14    0.62 
   0   9   1   22.19    0.62 
   0   9  -1   22.41    0.64 
   1  -9   1   30.87    0.74 
  -1  -9  -1   31.57    0.76 
  -1   9  -1   29.91    0.76 
   1   9   1   29.08    0.75 
   2  -9   1   29.18    0.74 
  -2  -9  -1   29.17    0.76 
   2   9   1   28.36    0.74 
  -2   9  -1   31.33    0.77 
  -3  -9  -1   19.04    0.62 
   3  -9   1   19.28    0.61 
   3   9   1   19.50    0.61 
  -3   9  -1   19.56    0.59 
  -4  -9  -1   34.28    0.89 
   4  -9   1   34.06    0.88 
   4   9   1   34.36    0.86 
  -4   9  -1   34.04    0.82 
   5  -9   1    2.37    0.28 
  -5  -9  -1    1.97    0.26 
  -5   9  -1    2.06    0.23 
   5   9   1    1.83    0.23 
   6  -9   1    1.46    0.24 
  -6  -9  -1    1.89    0.27 
   6   9   1    1.36    0.21 
  -6   9  -1    1.42    0.20 
  -7  -9  -1   24.26    0.81 
   7  -9   1   24.75    0.81 
   7   9   1   23.73    0.75 
  -7   9  -1   24.48    0.70 
   8  -9   1    7.99    0.48 
  -8  -9  -1    6.48    0.44 
   8   9   1    8.11    0.45 
  -9  -9  -1    4.81    0.41 
   9  -9   1    5.37    0.43 
   9   9   1    5.14    0.39 
  10  -9   1    0.87    0.25 
 -10  -9  -1    1.02    0.28 
  10   9   1    1.51    0.28 
 -11  -9  -1    6.70    0.52 
  11  -9   1    6.48    0.50 
  11   9   1    7.23    0.49 
 -10 -10   1    5.45    0.51 
  10  10  -1    6.98    0.49 
  -9 -10   1    1.59    0.30 
  -9  10   1    1.02    0.25 
   9  10  -1    1.98    0.31 
  -8 -10   1    8.82    0.51 
  -8  10   1    8.88    0.51 
   8  10  -1    8.03    0.48 
  -7 -10   1   11.49    0.56 
   7  10  -1   11.18    0.54 
  -7  10   1   10.91    0.54 
  -6 -10   1   13.25    0.57 
   6  10  -1   13.14    0.56 
  -6  10   1   13.36    0.56 
  -5 -10   1    3.76    0.32 
  -5  10   1    3.64    0.27 
  -5  10   1    3.49    0.29 
   5  10  -1    3.07    0.31 
  -4 -10   1    9.70    0.45 
   4  10  -1   10.09    0.47 
  -4  10   1   11.23    0.45 
  -3 -10   1   12.57    0.48 
   3 -10  -1   12.59    0.50 
   3  10  -1   10.32    0.48 
  -3  10   1   11.90    0.46 
   2 -10  -1   23.49    0.68 
   2  10  -1   24.15    0.72 
  -2  10   1   23.53    0.67 
   1 -10  -1    2.37    0.24 
   1  10  -1    2.02    0.24 
  -1  10   1    1.91    0.23 
   0 -10  -1    3.29    0.23 
   0 -10   1    3.20    0.24 
   0  10  -1    3.26    0.26 
   0  10   1    3.68    0.27 
   1 -10   1   20.78    0.61 
  -1 -10  -1   19.98    0.61 
   1  10   1   18.75    0.62 
  -1  10  -1   19.19    0.62 
   2 -10   1   26.41    0.74 
  -2 -10  -1   26.94    0.75 
   2  10   1   25.42    0.74 
  -2  10  -1   26.43    0.74 
   3 -10   1   39.75    0.98 
  -3 -10  -1   40.62    0.99 
   3  10   1   42.34    1.00 
  -3  10  -1   40.71    0.96 
  -4 -10  -1   33.44    0.90 
   4 -10   1   32.13    0.88 
  -4  10  -1   32.47    0.84 
   4  10   1   31.64    0.87 
  -5 -10  -1    2.55    0.30 
   5 -10   1    2.64    0.30 
  -5  10  -1    3.12    0.29 
   5  10   1    3.10    0.31 
  -6 -10  -1    6.18    0.41 
   6 -10   1    6.95    0.43 
  -6  10  -1    6.00    0.36 
   6  10   1    6.96    0.42 
  -7 -10  -1    6.81    0.44 
   7 -10   1    7.43    0.46 
   7  10   1    6.80    0.42 
  -7  10  -1    6.98    0.39 
  -8 -10  -1    0.99    0.24 
   8 -10   1    1.10    0.26 
   8  10   1    1.07    0.24 
   9 -10   1    0.54    0.23 
  -9 -10  -1    0.96    0.25 
   9  10   1    1.02    0.24 
 -10 -10  -1    2.61    0.39 
  10 -10   1    2.51    0.37 
  10  10   1    2.36    0.34 
 -10 -11   1   10.78    0.65 
  10  11  -1    9.94    0.60 
   9 -11  -1    7.33    0.52 
  -9 -11   1    6.11    0.50 
   9  11  -1    7.24    0.50 
   8 -11  -1    2.33    0.34 
  -8 -11   1    2.79    0.36 
   8  11  -1    1.93    0.31 
  -7 -11   1    1.07    0.24 
   7 -11  -1    1.02    0.25 
   7  11  -1    0.98    0.22 
   6 -11  -1   12.08    0.59 
  -6 -11   1   12.21    0.57 
   6  11  -1   11.51    0.55 
   5 -11  -1   14.56    0.62 
  -5 -11   1   15.86    0.62 
  -5  11   1   15.10    0.55 
   5  11  -1   14.82    0.62 
   4 -11  -1   34.17    0.95 
  -4  11   1   34.97    0.88 
   4  11  -1   34.96    0.96 
   3 -11  -1    2.89    0.31 
   3  11  -1    2.94    0.31 
  -3  11   1    2.96    0.29 
   2 -11  -1    2.13    0.25 
  -2  11   1    3.22    0.30 
   2  11  -1    2.08    0.27 
   1 -11  -1   26.30    0.72 
   1  11  -1   25.28    0.77 
  -1  11   1   25.63    0.75 
   0 -11   1    8.28    0.39 
   0  11  -1    9.13    0.45 
   0  11   1    9.19    0.44 
   1 -11   1    3.22    0.30 
  -1  11  -1    2.28    0.26 
   1  11   1    2.32    0.27 
   2 -11   1    6.11    0.37 
  -2  11  -1    6.08    0.37 
   2  11   1    6.55    0.39 
   3 -11   1    4.31    0.34 
  -3 -11  -1    4.69    0.34 
   3  11   1    4.85    0.34 
  -3  11  -1    4.65    0.33 
  -4 -11  -1   21.59    0.73 
   4 -11   1   22.47    0.74 
  -4  11  -1   21.44    0.69 
   4  11   1   22.53    0.74 
  -5 -11  -1    7.66    0.45 
   5 -11   1    6.80    0.43 
   5  11   1    7.42    0.44 
  -5  11  -1    7.17    0.40 
   6 -11   1   10.97    0.56 
  -6 -11  -1   12.33    0.59 
  -6  11  -1   11.94    0.51 
   6  11   1   12.90    0.58 
  -7 -11  -1    3.83    0.40 
   7 -11   1    3.78    0.40 
   7  11   1    3.46    0.38 
  -8 -11  -1    2.89    0.37 
   8 -11   1    3.44    0.41 
   8  11   1    2.69    0.34 
   9 -11   1    2.76    0.40 
  -9 -11  -1    2.94    0.40 
   9  11   1    2.68    0.36 
  -8 -12   1    0.01    0.20 
   8 -12  -1    0.24    0.22 
   8  12  -1    0.08    0.19 
  -7 -12   1    7.05    0.49 
   7 -12  -1    6.27    0.47 
   7  12  -1    7.06    0.48 
   6 -12  -1   13.53    0.65 
   6  12  -1   12.95    0.62 
   5 -12  -1   10.27    0.55 
   5  12  -1   11.09    0.57 
   4 -12  -1    0.66    0.21 
  -4  12   1    1.01    0.20 
   4  12  -1    0.73    0.21 
   3 -12  -1   11.97    0.54 
  -3  12   1   11.48    0.51 
   3  12  -1   12.31    0.57 
   2 -12  -1    4.07    0.33 
  -2  12   1    3.91    0.32 
   2  12  -1    4.27    0.35 
   1  12  -1    3.32    0.34 
  -1  12   1    4.61    0.34 
   0  12  -1   28.33    0.86 
   0  12   1   27.65    0.83 
   1 -12   1   12.33    0.51 
   1  12   1   12.01    0.53 
  -1  12  -1   10.71    0.52 
   2 -12   1    3.90    0.36 
  -2  12  -1    4.24    0.34 
   2  12   1    3.60    0.35 
   3 -12   1   15.46    0.61 
  -3  12  -1   15.24    0.60 
   3  12   1   16.54    0.66 
   4 -12   1   13.68    0.61 
   4  12   1   14.43    0.62 
  -4  12  -1   13.10    0.57 
   5 -12   1   12.48    0.60 
  -5 -12  -1   12.60    0.59 
   5  12   1   11.33    0.57 
  -5  12  -1   12.66    0.55 
  -6 -12  -1    0.82    0.24 
   6 -12   1    0.38    0.20 
  -6  12  -1    1.35    0.23 
   6  12   1    0.60    0.20 
  -7 -12  -1    3.01    0.38 
   7 -12   1    3.26    0.40 
   7  12   1    3.44    0.39 
   8 -12   1    2.38    0.36 
  -8 -12  -1    2.72    0.38 
   8  12   1    2.43    0.35 
   7 -13  -1    0.43    0.24 
   7  13  -1    0.22    0.20 
   6 -13  -1    5.16    0.49 
   6  13  -1    5.31    0.49 
   5 -13  -1   29.10    0.95 
   5  13  -1   28.66    0.97 
   4 -13  -1    1.36    0.26 
   4  13  -1    1.62    0.29 
  -4  13   1    1.55    0.26 
   3 -13  -1    2.42    0.32 
   3  13  -1    1.80    0.28 
  -3  13   1    2.05    0.28 
   2  13  -1   21.41    0.79 
  -2  13   1   20.31    0.73 
   1  13  -1   10.44    0.55 
  -1  13   1    9.58    0.50 
   0  13   1    0.64    0.20 
   0  13  -1    0.93    0.23 
  -1  13  -1    2.03    0.29 
   1  13   1    1.74    0.28 
   2 -13   1    5.02    0.38 
  -2  13  -1    5.38    0.39 
   2  13   1    4.67    0.37 
   3 -13   1    4.06    0.39 
   3  13   1    4.43    0.43 
  -3  13  -1    3.97    0.39 
   4 -13   1    3.67    0.39 
  -4  13  -1    4.15    0.39 
   4  13   1    4.32    0.42 
   5 -13   1   14.04    0.67 
   5  13   1   14.70    0.67 
  -5  13  -1   14.17    0.62 
   6 -13   1    3.08    0.40 
   6  13   1    2.86    0.37 
  -7 -13  -1    3.91    0.44 
   7 -13   1    3.57    0.43 
   7  13   1    3.15    0.41 
   5 -14  -1    6.97    0.51 
   5  14  -1    6.69    0.51 
   4 -14  -1    4.43    0.44 
   4  14  -1    4.33    0.44 
  -3  14   1    0.60    0.20 
   3  14  -1    0.41    0.21 
  -2  14   1    1.74    0.28 
   2  14  -1    1.92    0.31 
  -1  14   1    7.50    0.48 
   1  14  -1    7.37    0.49 
   0  14   1    1.94    0.30 
   0  14  -1    2.25    0.33 
   1  14   1    4.40    0.44 
  -1  14  -1    3.92    0.41 
   2  14   1    1.60    0.28 
  -2  14  -1    1.68    0.28 
   3 -14   1    2.48    0.34 
  -3  14  -1    2.92    0.35 
   3  14   1    2.86    0.36 
   4 -14   1    6.27    0.47 
   4  14   1    7.05    0.49 
  -4  14  -1    6.75    0.46 
   5 -14   1    7.53    0.53 
  -5  14  -1    7.51    0.48 
   5  14   1    6.51    0.50 
   2  15  -1   14.23    0.71 
  -2  15   1   16.03    0.70 
   1  15  -1    0.09    0.19 
  -1  15   1    0.29    0.19 
   0  15  -1    0.11    0.20 
   0  15   1    0.23    0.18 
   1  15   1    4.06    0.44 
  -1  15  -1    2.68    0.36 
   2  15   1    4.51    0.45 
  -2  15  -1    5.23    0.43 
  -3  15  -1    3.27    0.40 
 -14   0   2    5.55    0.46 
 -13   0   2    4.76    0.45 
 -12   0   2    0.31    0.18 
 -11   0   2    7.34    0.43 
 -10   0   2    2.68    0.29 
  -9   0   2   34.18    0.87 
  -9   0   2   34.49    0.77 
   8   0  -2   22.08    0.52 
  -8   0   2   21.73    0.63 
  -8   0   2   22.80    0.57 
   7   0  -2    2.53    0.16 
  -7   0   2    1.83    0.15 
  -7   0   2    1.99    0.20 
   6   0  -2   23.43    0.48 
  -6   0   2   23.10    0.52 
  -6   0   2   23.24    0.57 
  -5   0   2   65.73    1.05 
  -5   0   2   63.82    1.10 
   5   0  -2   67.93    0.98 
  -4   0   2    0.70    0.09 
   4   0  -2    0.54    0.06 
  -4   0   2    0.64    0.08 
  -3   0   2   46.09    0.77 
  -3   0   2   47.99    0.74 
  -2   0   2  250.01    3.24 
  -2   0   2  247.47    3.20 
  -2   0  -2  469.45    6.03 
  -2   0  -2  471.21    5.82 
  -3   0  -2    0.28    0.05 
   3   0   2    0.27    0.05 
  -3   0  -2    0.15    0.04 
  -4   0  -2    0.19    0.06 
  -4   0  -2    0.19    0.05 
  -4   0  -2    0.43    0.06 
  -5   0  -2  114.48    1.72 
  -5   0  -2  115.13    1.68 
  -5   0  -2  117.93    1.62 
  -6   0  -2    1.06    0.11 
  -6   0  -2    1.20    0.14 
  -6   0  -2    1.28    0.15 
  -7   0  -2    5.26    0.25 
  -7   0  -2    4.98    0.26 
  -7   0  -2    4.89    0.21 
  -8   0  -2    0.66    0.11 
  -8   0  -2    0.61    0.12 
  -8   0  -2    0.64    0.13 
  -9   0  -2    4.32    0.29 
  10   0   2   18.74    0.61 
 -10   0  -2   18.90    0.64 
 -11   0  -2    4.94    0.35 
  11   0   2    4.79    0.34 
  12   0   2    0.13    0.14 
 -12   0  -2    0.01    0.14 
 -13   0  -2    0.34    0.19 
 -14  -1   2    5.48    0.51 
  14  -1  -2    4.69    0.49 
 -13  -1   2    9.93    0.56 
 -12  -1   2    6.49    0.44 
 -12   1   2    5.92    0.41 
 -11  -1   2    4.33    0.35 
 -11   1   2    3.78    0.32 
 -10  -1   2   67.35    1.42 
 -10   1   2   66.62    1.38 
 -10   1   2   68.93    1.30 
  -9  -1   2    8.94    0.43 
  -9   1   2    9.33    0.42 
  -9   1   2    9.56    0.39 
  -8  -1   2   83.13    1.52 
  -8  -1   2   84.58    1.37 
   8  -1  -2   84.06    1.32 
  -8   1   2   83.10    1.42 
   8   1  -2   84.49    1.35 
  -8   1   2   82.89    1.49 
  -7  -1   2   -0.01    0.05 
  -7  -1   2   -0.03    0.06 
  -7   1   2   -0.02    0.06 
   7   1  -2   -0.08    0.05 
  -7   1   2    0.00    0.06 
  -6  -1   2   14.26    0.44 
  -6  -1   2   13.91    0.37 
  -6   1   2   14.41    0.40 
  -6   1   2   14.15    0.34 
   6   1  -2   14.72    0.37 
  -6   1   2   13.55    0.41 
  -5  -1   2   31.67    0.67 
  -5  -1   2   30.78    0.59 
   5   1  -2   32.29    0.57 
  -5   1   2   32.63    0.66 
  -5   1   2   31.20    0.54 
  -5   1   2   31.74    0.63 
  -4  -1   2   26.43    0.49 
  -4  -1   2   26.30    0.55 
  -4   1   2   24.91    0.52 
   4   1  -2   25.86    0.46 
  -4   1   2   26.13    0.52 
  -4   1   2   25.93    0.43 
  -3  -1   2   14.04    0.34 
   3  -1  -2   14.81    0.35 
  -3  -1   2   14.66    0.31 
   3   1  -2   14.69    0.28 
  -3   1   2   14.22    0.33 
   2  -1  -2  139.83    1.91 
  -2  -1   2  140.23    1.87 
  -2  -1   2  140.21    1.90 
  -2   1   2  141.84    1.89 
  -1  -1   2  985.37   12.54 
   1  -1  -2  973.34   12.60 
  -1   1   2 1000.00   12.52 
   1  -1   2   49.42    0.73 
  -1  -1  -2   50.02    0.76 
  -1   1  -2   49.67    0.71 
  -2  -1  -2  471.82    5.84 
   2  -1   2  473.99    5.95 
  -2  -1  -2  470.37    6.02 
  -2   1  -2  465.74    5.83 
  -3  -1  -2   49.89    0.83 
   3  -1   2   50.99    0.79 
  -3   1  -2   49.88    0.76 
  -3   1  -2   50.52    0.79 
  -4  -1  -2   44.12    0.78 
  -4  -1  -2   42.37    0.75 
  -4   1  -2   42.79    0.73 
  -4   1  -2   43.59    0.72 
  -4   1  -2   42.23    0.71 
  -5  -1  -2   26.39    0.59 
  -5  -1  -2   27.61    0.47 
  -5   1  -2   26.55    0.53 
  -5   1  -2   27.13    0.56 
  -5   1  -2   27.18    0.55 
  -6  -1  -2   14.56    0.44 
  -6  -1  -2   14.99    0.33 
  -6   1  -2   14.40    0.41 
  -6   1  -2   14.99    0.41 
  -6   1  -2   15.59    0.39 
  -7  -1  -2    3.20    0.22 
  -7  -1  -2    3.00    0.16 
  -7   1  -2    3.04    0.18 
  -7   1  -2    3.35    0.20 
  -7   1  -2    3.25    0.20 
   7   1   2    3.17    0.21 
  -8  -1  -2   72.76    1.37 
  -8   1  -2   74.73    1.32 
  -8   1  -2   72.30    1.23 
  -8   1  -2   74.29    1.30 
   8   1   2   72.60    1.31 
  -9  -1  -2   12.14    0.49 
   9   1   2   12.02    0.46 
  -9   1  -2   13.16    0.46 
  -9   1  -2   12.42    0.41 
  -9   1  -2   12.01    0.46 
 -10  -1  -2    2.74    0.30 
  10   1   2    2.87    0.28 
 -10   1  -2    3.02    0.29 
 -10   1  -2    3.16    0.29 
 -11  -1  -2   20.60    0.72 
  11   1   2   21.67    0.68 
 -11   1  -2   21.35    0.70 
 -12  -1  -2    2.76    0.33 
  12   1   2    2.55    0.30 
 -13  -1  -2    0.35    0.20 
 -14  -1  -2    1.09    0.29 
 -14  -2   2    2.35    0.37 
  13  -2  -2    8.53    0.54 
 -13  -2   2    8.25    0.53 
  12  -2  -2    7.54    0.48 
 -12  -2   2    6.64    0.45 
  11  -2  -2   10.39    0.51 
 -11  -2   2   10.25    0.53 
 -11   2   2   11.11    0.49 
 -10  -2   2    8.99    0.46 
 -10   2   2    9.29    0.43 
  -9  -2   2   35.69    0.92 
  -9   2   2   36.48    0.85 
   9   2  -2   35.92    0.79 
  -8  -2   2   20.63    0.64 
   8   2  -2   23.52    0.57 
  -8   2   2   22.02    0.60 
  -7  -2   2   23.41    0.51 
  -7  -2   2   22.46    0.62 
   7   2  -2   22.27    0.53 
  -7   2   2   22.41    0.58 
  -7   2   2   22.00    0.48 
  -6  -2   2   60.17    1.11 
  -6  -2   2   59.32    0.96 
  -6   2   2   59.07    0.92 
  -6   2   2   57.90    1.05 
   6   2  -2   60.10    0.99 
  -5  -2   2   14.03    0.33 
  -5  -2   2   12.85    0.40 
   5  -2  -2   13.74    0.39 
  -5   2   2   13.43    0.30 
   5   2  -2   13.65    0.34 
  -5   2   2   12.47    0.37 
   4  -2  -2   61.58    1.01 
  -4  -2   2   61.49    0.93 
  -4   2   2   60.66    0.87 
   4   2  -2   60.75    0.93 
  -3  -2   2   16.38    0.39 
  -3  -2   2   17.23    0.34 
   3  -2  -2   16.96    0.39 
   3   2  -2   15.93    0.34 
  -3   2   2   16.38    0.38 
  -2  -2   2   79.22    1.15 
   2  -2  -2   78.39    1.16 
  -2  -2   2   77.44    1.11 
  -2   2   2   79.63    1.15 
   2   2  -2   77.48    1.09 
   1  -2  -2   82.58    1.19 
  -1  -2   2   82.77    1.15 
   1   2  -2   82.38    1.13 
  -1   2   2   83.63    1.16 
   0  -2   2   75.94    1.08 
   0   2  -2   76.67    1.06 
   1  -2   2  165.32    2.20 
  -1  -2  -2  165.07    2.25 
  -1   2  -2  165.98    2.15 
   1   2   2  165.48    2.14 
  -2  -2  -2   81.76    1.23 
   2  -2   2   80.39    1.18 
   2   2   2   79.88    1.15 
  -2   2  -2   81.44    1.15 
   3  -2   2  281.82    3.67 
  -3  -2  -2  277.96    3.73 
  -3   2  -2  278.02    3.58 
   3   2   2  278.42    3.60 
  -4  -2  -2   27.56    0.60 
  -4   2  -2   27.41    0.54 
  -4   2  -2   27.57    0.54 
   4   2   2   28.05    0.56 
  -4   2  -2   28.31    0.50 
  -5  -2  -2   20.65    0.53 
  -5   2  -2   21.18    0.48 
  -5   2  -2   21.21    0.48 
  -5   2  -2   20.74    0.44 
   5   2   2   21.08    0.50 
  -6  -2  -2    9.44    0.36 
  -6  -2  -2    9.65    0.23 
  -6   2  -2    9.14    0.32 
  -6   2  -2    9.58    0.32 
   6   2   2    9.81    0.34 
  -6   2  -2    9.75    0.31 
  -7  -2  -2   15.67    0.50 
   7   2   2   14.50    0.45 
  -7   2  -2   14.52    0.42 
  -7   2  -2   14.70    0.42 
  -7   2  -2   15.20    0.45 
  -8  -2  -2   18.36    0.59 
  -8   2  -2   20.84    0.55 
   8   2   2   19.77    0.57 
  -8   2  -2   20.11    0.55 
  -8   2  -2   18.90    0.52 
  -9  -2  -2    1.94    0.25 
   9   2   2    1.88    0.23 
  -9   2  -2    2.12    0.22 
  -9   2  -2    1.85    0.20 
  -9   2  -2    1.76    0.20 
 -10  -2  -2    3.98    0.32 
 -10   2  -2    3.98    0.30 
 -10   2  -2    3.47    0.28 
  10   2   2    3.76    0.28 
 -10   2  -2    4.22    0.28 
 -11  -2  -2   11.83    0.55 
  11   2   2   10.06    0.47 
 -11   2  -2   11.06    0.48 
 -12  -2  -2    6.07    0.43 
  12   2   2    4.94    0.35 
 -13  -2  -2    5.49    0.44 
 -14  -2  -2    2.89    0.40 
 -13  -3   2    0.52    0.21 
  12  -3  -2    5.02    0.40 
 -12  -3   2    4.84    0.40 
 -12   3   2    5.91    0.40 
 -11  -3   2    8.36    0.48 
  11  -3  -2    6.93    0.43 
 -11   3   2    8.21    0.44 
 -10  -3   2   12.96    0.56 
  10  -3  -2   11.55    0.51 
 -10   3   2   11.82    0.50 
  -9  -3   2   11.01    0.50 
   9  -3  -2   10.55    0.45 
  -9   3   2   11.00    0.46 
   9   3  -2   10.00    0.40 
   8  -3  -2   51.34    1.07 
  -8  -3   2   52.06    1.13 
  -8   3   2   51.23    1.06 
   8   3  -2   52.79    1.00 
   7  -3  -2   18.99    0.55 
  -7  -3   2   18.87    0.44 
  -7  -3   2   18.04    0.57 
  -7   3   2   18.70    0.54 
  -7   3   2   19.00    0.44 
   7   3  -2   18.97    0.50 
   6  -3  -2   72.04    1.25 
  -6  -3   2   74.95    1.12 
  -6  -3   2   71.41    1.30 
  -6   3   2   72.35    1.09 
   6   3  -2   72.18    1.18 
  -6   3   2   69.75    1.24 
  -5  -3   2    2.22    0.13 
   5  -3  -2    2.06    0.17 
  -5  -3   2    1.97    0.17 
   5   3  -2    2.65    0.16 
  -5   3   2    2.32    0.16 
  -5   3   2    2.18    0.12 
   4  -3  -2   17.11    0.43 
  -4  -3   2   16.68    0.35 
  -4  -3   2   17.06    0.44 
  -4   3   2   16.36    0.42 
   4   3  -2   15.47    0.38 
  -4   3   2   16.96    0.34 
   3  -3  -2   28.08    0.55 
  -3  -3   2   27.21    0.48 
  -3  -3   2   27.14    0.56 
   3   3  -2   27.24    0.52 
  -3   3   2   27.10    0.46 
  -3   3   2   26.69    0.55 
  -2  -3   2   54.59    0.83 
  -2  -3   2   55.47    0.88 
   2  -3  -2   55.52    0.89 
   2   3  -2   55.74    0.86 
  -2   3   2   54.33    0.88 
  -2   3   2   55.98    0.80 
  -1  -3   2   43.50    0.70 
   1  -3  -2   44.45    0.75 
  -1  -3   2   45.09    0.70 
  -1   3   2   45.73    0.72 
   1   3  -2   47.33    0.73 
  -1   3   2   45.33    0.68 
   0  -3  -2   88.73    1.31 
   0  -3   2   86.42    1.25 
   0   3   2   87.67    1.21 
   0   3  -2   87.48    1.25 
   0   3   2   88.03    1.21 
   1  -3   2   99.15    1.42 
  -1  -3  -2   99.48    1.46 
   1   3   2   97.62    1.36 
  -1   3  -2   96.70    1.38 
   2  -3   2  125.62    1.78 
  -2  -3  -2  125.91    1.83 
   2   3   2  125.08    1.73 
  -2   3  -2  124.57    1.73 
   3  -3   2   69.87    1.12 
   3   3   2   69.08    1.08 
  -3   3  -2   68.91    1.07 
  -4  -3  -2  203.61    2.91 
  -4   3  -2  202.79    2.81 
  -4   3  -2  212.70    2.71 
  -4   3  -2  202.54    2.76 
  -5  -3  -2    9.12    0.35 
  -5   3  -2    8.00    0.29 
  -5   3  -2    8.43    0.29 
  -5   3  -2    8.36    0.25 
   5   3   2    7.96    0.30 
  -6  -3  -2    1.68    0.18 
   6   3   2    1.61    0.18 
  -6   3  -2    1.68    0.17 
  -6   3  -2    1.70    0.16 
  -6   3  -2    1.54    0.12 
  -7  -3  -2   79.19    1.46 
  -7   3  -2   82.34    1.32 
  -7   3  -2   79.95    1.37 
  -7   3  -2   82.02    1.36 
   7   3   2   80.95    1.40 
  -8  -3  -2   34.35    0.87 
  -8   3  -2   36.16    0.80 
   8   3   2   34.16    0.81 
  -8   3  -2   35.45    0.79 
  -8   3  -2   35.68    0.76 
  -9  -3  -2    6.65    0.38 
   9   3   2    6.61    0.35 
  -9   3  -2    7.31    0.34 
  -9   3  -2    6.93    0.34 
 -10  -3  -2    2.77    0.31 
 -10   3  -2    2.74    0.27 
 -10   3  -2    2.22    0.25 
  10   3   2    2.30    0.26 
 -11  -3  -2    3.40    0.37 
  11   3   2    4.27    0.33 
 -11   3  -2    3.98    0.31 
 -12  -3  -2    5.22    0.42 
  12   3   2    5.88    0.39 
 -13  -3  -2    2.13    0.34 
 -13  -4   2    1.23    0.29 
 -12  -4   2    0.30    0.20 
 -12   4   2    0.12    0.16 
 -11  -4   2    7.41    0.48 
 -11   4   2    9.92    0.50 
  10  -4  -2   20.65    0.69 
 -10  -4   2   21.47    0.75 
 -10   4   2   21.32    0.70 
  10   4  -2   21.64    0.64 
   9  -4  -2    8.06    0.41 
  -9  -4   2    8.24    0.45 
   9   4  -2    8.53    0.38 
  -9   4   2    8.66    0.41 
  -8  -4   2    1.09    0.20 
   8  -4  -2    0.99    0.17 
   8   4  -2    0.99    0.16 
  -8   4   2    1.08    0.19 
   7  -4  -2   36.60    0.82 
   7   4  -2   36.69    0.78 
  -7   4   2   36.71    0.84 
  -6  -4   2   10.93    0.29 
  -6  -4   2   10.43    0.40 
   6  -4  -2    9.83    0.37 
   6   4  -2   10.09    0.35 
  -6   4   2    9.77    0.29 
  -6   4   2    9.74    0.37 
  -5  -4   2   36.55    0.64 
  -5  -4   2   36.31    0.79 
   5  -4  -2   35.56    0.74 
  -5   4   2   36.22    0.77 
  -5   4   2   36.25    0.64 
   5   4  -2   36.84    0.73 
   4  -4  -2    8.22    0.29 
  -4  -4   2    8.23    0.31 
  -4  -4   2    8.18    0.23 
  -4   4   2    8.24    0.24 
   4   4  -2    8.66    0.29 
  -4   4   2    7.66    0.30 
  -3  -4   2  110.76    1.66 
  -3  -4   2  111.03    1.54 
   3  -4  -2  109.73    1.64 
   3   4  -2  110.23    1.60 
  -3   4   2  108.80    1.65 
  -3   4   2  111.77    1.53 
  -2  -4   2    8.34    0.26 
   2  -4  -2    8.13    0.27 
  -2  -4   2    8.25    0.23 
   2   4  -2    7.95    0.26 
  -2   4   2    8.20    0.23 
  -2   4   2    7.74    0.26 
  -1  -4   2   30.44    0.54 
   1  -4  -2   29.57    0.59 
  -1  -4   2   30.04    0.54 
  -1   4   2   30.88    0.53 
   1   4  -2   30.16    0.58 
  -1   4   2   29.91    0.55 
   0  -4  -2   83.55    1.29 
   0  -4   2   83.24    1.25 
   0   4   2   82.57    1.19 
   0   4  -2   83.45    1.25 
   0   4   2   85.12    1.21 
  -1  -4  -2  132.16    1.92 
   1  -4   2  129.84    1.87 
   1   4   2  130.82    1.81 
  -1   4  -2  130.51    1.83 
   1   4   2  133.58    1.74 
  -2  -4  -2   16.25    0.44 
   2  -4   2   15.98    0.41 
  -2   4  -2   16.39    0.39 
   2   4   2   16.65    0.39 
  -3  -4  -2  192.46    2.80 
   3   4   2  201.20    2.68 
  -3   4  -2  197.58    2.67 
  -4  -4  -2  150.42    2.29 
   4  -4   2  157.47    2.05 
  -4   4  -2  151.10    2.14 
   4   4   2  149.68    2.17 
  -5  -4  -2    3.39    0.23 
   5  -4   2    3.16    0.16 
   5   4   2    3.13    0.20 
  -5   4  -2    3.52    0.19 
  -5   4  -2    3.38    0.20 
  -6  -4  -2   26.28    0.70 
   6  -4   2   26.70    0.56 
  -6   4  -2   28.06    0.63 
  -6   4  -2   27.62    0.64 
   6   4   2   25.34    0.64 
  -7  -4  -2   13.03    0.48 
  -7   4  -2   12.43    0.43 
  -7   4  -2   12.31    0.41 
   7   4   2   12.47    0.44 
  -8  -4  -2    8.93    0.43 
   8   4   2    9.79    0.41 
  -8   4  -2    9.23    0.39 
  -8   4  -2    9.66    0.38 
  -9  -4  -2    6.15    0.38 
  -9   4  -2    5.66    0.33 
   9   4   2    5.81    0.34 
  -9   4  -2    5.91    0.32 
 -10  -4  -2    2.95    0.33 
 -10   4  -2    3.04    0.29 
  10   4   2    3.33    0.32 
 -11  -4  -2    1.75    0.28 
  11   4   2    1.65    0.25 
  12   4   2    3.90    0.38 
 -13  -4  -2   20.51    0.84 
  13   4   2   19.85    0.75 
 -13  -5   2    6.95    0.52 
 -13   5   2    7.14    0.48 
 -12  -5   2   12.19    0.63 
 -12   5   2   11.15    0.56 
 -11  -5   2    4.00    0.41 
 -11   5   2    3.64    0.37 
 -10  -5   2    5.09    0.39 
  10   5  -2    4.81    0.32 
 -10   5   2    4.52    0.35 
   9  -5  -2   19.48    0.64 
  -9  -5   2   20.85    0.72 
   9   5  -2   20.89    0.63 
  -9   5   2   22.02    0.70 
  -8  -5   2   28.98    0.82 
   8  -5  -2   28.36    0.75 
  -8   5   2   29.06    0.78 
   8   5  -2   29.01    0.73 
  -7  -5   2   20.19    0.64 
   7  -5  -2   20.29    0.58 
   7   5  -2   20.96    0.58 
   6  -5  -2   65.57    1.18 
  -6  -5   2   61.67    1.23 
   6   5  -2   62.46    1.14 
  -6   5   2   64.53    1.04 
  -6   5   2   63.42    1.21 
  -5  -5   2   54.37    0.87 
  -5  -5   2   55.24    1.07 
   5  -5  -2   52.67    1.00 
   5   5  -2   54.15    1.00 
  -5   5   2   55.87    1.05 
  -5   5   2   54.93    0.91 
   4  -5  -2   50.34    0.93 
  -4  -5   2   50.12    0.82 
  -4  -5   2   49.84    0.96 
  -4   5   2   51.86    0.96 
   4   5  -2   50.76    0.92 
  -4   5   2   52.56    0.85 
  -3  -5   2    8.31    0.24 
  -3  -5   2    8.49    0.30 
   3  -5  -2    8.12    0.30 
   3   5  -2    8.35    0.30 
  -3   5   2    8.34    0.30 
  -3   5   2    8.02    0.25 
   2  -5  -2  138.55    2.02 
  -2  -5   2  139.89    1.99 
  -2  -5   2  138.66    1.92 
  -2   5   2  136.83    1.99 
   2   5  -2  136.14    1.98 
  -2   5   2  139.53    1.91 
  -1  -5   2  202.41    2.75 
   1  -5  -2  201.17    2.83 
  -1  -5   2  203.27    2.74 
   1   5  -2  206.99    2.77 
  -1   5   2  204.15    2.70 
  -1   5   2  201.47    2.75 
   0  -5  -2    2.75    0.19 
   0  -5   2    2.97    0.16 
   0  -5   2    3.56    0.15 
   0   5   2    3.34    0.16 
   0   5   2    3.19    0.15 
   0   5  -2    2.75    0.17 
   1  -5   2  109.42    1.65 
  -1  -5  -2  109.48    1.70 
  -1   5  -2  109.41    1.62 
   1   5   2  111.34    1.51 
   1   5   2  110.40    1.60 
  -2  -5  -2  179.94    2.30 
   2  -5   2  175.04    2.50 
  -2  -5  -2  178.67    2.56 
   2   5   2  172.52    2.43 
  -2   5  -2  173.07    2.43 
  -3  -5  -2   24.43    0.61 
   3  -5   2   25.37    0.59 
   3   5   2   24.43    0.56 
  -3   5  -2   25.25    0.56 
   4  -5   2   12.12    0.41 
  -4  -5  -2   12.38    0.43 
  -4   5  -2   13.08    0.39 
   4   5   2   12.75    0.40 
  -5  -5  -2    1.41    0.18 
  -5   5  -2    1.42    0.15 
   5   5   2    1.36    0.16 
  -6  -5  -2    4.92    0.30 
   6   5   2    4.52    0.26 
  -6   5  -2    4.97    0.26 
  -6   5  -2    4.98    0.27 
  -7  -5  -2   22.75    0.70 
   7   5   2   24.01    0.66 
  -7   5  -2   24.19    0.65 
  -7   5  -2   24.06    0.61 
  -8  -5  -2    2.48    0.28 
  -8   5  -2    2.46    0.23 
  -8   5  -2    2.28    0.24 
   8   5   2    2.80    0.27 
  -9  -5  -2   15.46    0.61 
   9   5   2   14.80    0.55 
  -9   5  -2   15.79    0.53 
 -10  -5  -2   12.04    0.58 
  10   5   2   10.77    0.49 
 -10   5  -2   11.93    0.49 
 -11  -5  -2    3.75    0.39 
  11  -5   2    4.62    0.37 
  11   5   2    3.86    0.37 
  12  -5   2    8.28    0.50 
 -12  -5  -2    8.52    0.54 
  12   5   2    7.71    0.47 
 -13  -5  -2    0.89    0.27 
  13   5   2    1.01    0.25 
 -13   6   2    7.87    0.52 
 -12  -6   2    2.06    0.34 
 -12   6   2    1.87    0.31 
 -11  -6   2    2.25    0.33 
 -11   6   2    2.82    0.33 
 -10  -6   2    3.36    0.37 
 -10   6   2    3.08    0.33 
  10   6  -2    3.63    0.33 
  -9  -6   2    1.70    0.27 
  -9   6   2    1.74    0.24 
   9   6  -2    1.91    0.24 
  -8  -6   2    7.63    0.43 
   8   6  -2    8.26    0.39 
  -8   6   2    7.88    0.41 
  -7  -6   2    7.10    0.39 
   7  -6  -2    7.68    0.36 
   7   6  -2    7.43    0.35 
  -7   6   2    7.57    0.39 
  -6  -6   2    0.46    0.14 
   6  -6  -2    0.47    0.13 
  -6   6   2    0.62    0.11 
   6   6  -2    0.46    0.12 
  -6   6   2    0.46    0.14 
   5  -6  -2  109.54    1.75 
  -5  -6   2  106.54    1.80 
  -5   6   2  110.64    1.80 
  -5   6   2  110.61    1.63 
   5   6  -2  107.91    1.73 
  -4  -6   2   19.10    0.54 
   4  -6  -2   19.20    0.51 
  -4  -6   2   18.88    0.42 
  -4   6   2   19.27    0.46 
   4   6  -2   18.38    0.52 
  -4   6   2   19.84    0.54 
  -3  -6   2    1.26    0.15 
  -3  -6   2    1.40    0.11 
   3  -6  -2    1.27    0.15 
   3   6  -2    1.47    0.16 
  -3   6   2    1.21    0.13 
  -3   6   2    1.24    0.15 
   2  -6  -2   17.66    0.47 
  -2  -6   2   18.12    0.42 
  -2  -6   2   18.76    0.46 
   2   6  -2   17.91    0.48 
  -2   6   2   17.65    0.46 
  -2   6   2   18.01    0.44 
  -1  -6   2   29.52    0.60 
   1  -6  -2   30.25    0.67 
  -1  -6   2   30.81    0.61 
   1   6  -2   31.12    0.67 
  -1   6   2   31.72    0.63 
  -1   6   2   31.39    0.62 
   0  -6   2   46.63    0.85 
   0  -6   2   47.31    0.78 
   0  -6  -2   46.47    0.90 
   0   6   2   46.52    0.79 
   0   6  -2   47.24    0.88 
   0   6   2   45.95    0.84 
   1  -6   2  106.49    1.68 
   1  -6   2  113.44    1.54 
  -1  -6  -2  107.34    1.73 
  -1   6  -2  111.75    1.68 
   1   6   2  111.10    1.66 
   1   6   2  110.57    1.55 
  -2  -6  -2   18.64    0.53 
   2  -6   2   18.47    0.50 
  -2  -6  -2   19.64    0.38 
   2  -6   2   18.94    0.37 
  -2   6  -2   19.10    0.49 
   2   6   2   19.52    0.49 
   3  -6   2    2.23    0.18 
  -3  -6  -2    2.46    0.23 
   3   6   2    2.59    0.18 
  -3   6  -2    2.34    0.17 
   4  -6   2    5.67    0.29 
  -4  -6  -2    6.46    0.32 
  -4   6  -2    6.37    0.28 
   4   6   2    6.44    0.29 
   5  -6   2    9.68    0.40 
  -5  -6  -2    9.36    0.41 
  -5   6  -2    9.73    0.36 
   5   6   2    9.39    0.37 
  -6  -6  -2   34.37    0.88 
  -6   6  -2   34.91    0.78 
   6   6   2   34.98    0.82 
  -7  -6  -2   27.35    0.79 
   7   6   2   25.33    0.70 
  -7   6  -2   24.22    0.65 
  -8  -6  -2    7.54    0.42 
  -8   6  -2    7.86    0.37 
   8   6   2    7.16    0.38 
  -9  -6  -2   24.22    0.81 
   9  -6   2   24.52    0.77 
  -9   6  -2   23.99    0.69 
   9   6   2   22.94    0.73 
  10  -6   2   17.09    0.66 
 -10  -6  -2   16.19    0.68 
 -10   6  -2   16.79    0.59 
  10   6   2   16.17    0.62 
  11  -6   2   32.41    0.97 
 -11  -6  -2   30.15    1.00 
  11   6   2   32.36    0.94 
  12  -6   2    1.24    0.27 
 -12  -6  -2    0.88    0.25 
  12   6   2    1.43    0.26 
 -13  -6  -2    7.77    0.56 
  13   6   2    8.59    0.53 
 -12  -7   2    4.16    0.47 
 -12   7   2    4.75    0.46 
 -11  -7   2    6.41    0.48 
 -11   7   2    6.50    0.46 
 -10  -7   2   12.56    0.61 
 -10   7   2   12.97    0.59 
  10   7  -2   12.33    0.54 
  -9  -7   2    4.69    0.38 
   9   7  -2    4.80    0.33 
  -9   7   2    3.58    0.35 
  -8  -7   2   20.16    0.70 
  -8   7   2   18.83    0.66 
   8   7  -2   20.10    0.64 
  -7  -7   2   19.19    0.66 
   7   7  -2   18.82    0.60 
  -7   7   2   18.33    0.62 
  -6  -7   2    7.60    0.39 
  -6   7   2    8.89    0.41 
   6   7  -2    7.79    0.37 
  -5  -7   2   43.23    0.96 
   5  -7  -2   43.68    0.92 
   5   7  -2   43.56    0.94 
  -5   7   2   43.72    0.84 
  -5   7   2   43.36    0.96 
  -4  -7   2  102.53    1.71 
   4  -7  -2  100.91    1.66 
   4   7  -2  103.53    1.69 
  -4   7   2  102.72    1.70 
  -4   7   2  103.44    1.59 
  -3  -7   2   33.49    0.65 
  -3  -7   2   34.01    0.75 
   3  -7  -2   34.43    0.75 
  -3   7   2   34.23    0.70 
   3   7  -2   33.04    0.76 
  -3   7   2   32.82    0.74 
  -2  -7   2   50.47    0.89 
   2  -7  -2   50.94    0.98 
  -2  -7   2   50.77    0.94 
   2   7  -2   51.71    1.00 
  -2   7   2   50.99    0.95 
  -2   7   2   51.61    0.93 
   1  -7  -2   71.02    1.24 
  -1  -7   2   71.03    1.17 
  -1  -7   2   70.75    1.16 
  -1   7   2   70.06    1.17 
  -1   7   2   69.25    1.18 
   1   7  -2   70.92    1.24 
   0  -7   2   12.07    0.38 
   0  -7   2   12.60    0.34 
   0  -7  -2   12.02    0.42 
   0   7   2   12.51    0.35 
   0   7   2   12.58    0.39 
   0   7  -2   13.89    0.43 
  -1  -7  -2   16.93    0.51 
   1  -7   2   16.59    0.47 
  -1  -7  -2   17.23    0.41 
   1   7   2   16.53    0.47 
  -2  -7  -2   10.15    0.40 
   2  -7   2    9.82    0.37 
  -2   7  -2   10.02    0.37 
   2   7   2   10.67    0.37 
   3  -7   2    2.43    0.20 
  -3  -7  -2    2.14    0.22 
  -3   7  -2    2.46    0.19 
   3   7   2    2.41    0.19 
  -4  -7  -2    8.88    0.40 
   4  -7   2    9.51    0.39 
   4   7   2    9.57    0.38 
  -4   7  -2    9.20    0.36 
  -5  -7  -2    6.26    0.36 
   5  -7   2    5.26    0.32 
   5   7   2    6.62    0.33 
  -5   7  -2    5.94    0.29 
  -6  -7  -2    6.84    0.39 
   6  -7   2    7.13    0.39 
  -6   7  -2    7.33    0.34 
   6   7   2    7.20    0.36 
  -7  -7  -2    0.75    0.18 
   7  -7   2    0.63    0.18 
  -7   7  -2    0.55    0.13 
   7   7   2    0.65    0.17 
  -8  -7  -2    4.31    0.35 
   8  -7   2    4.20    0.34 
   8   7   2    4.35    0.32 
  -8   7  -2    4.34    0.29 
  -9  -7  -2   11.86    0.58 
   9  -7   2   11.73    0.55 
  -9   7  -2   10.90    0.47 
   9   7   2   11.52    0.52 
  10  -7   2   19.00    0.73 
 -10  -7  -2   18.48    0.75 
  10   7   2   17.54    0.67 
  11  -7   2    3.72    0.41 
 -11  -7  -2    3.42    0.40 
  11   7   2    3.43    0.37 
  12  -7   2    7.29    0.52 
 -12  -7  -2    7.53    0.54 
  12   7   2    7.73    0.48 
 -12  -8   2    1.85    0.35 
 -12   8   2    1.32    0.30 
 -11  -8   2    2.34    0.36 
  11   8  -2    1.68    0.27 
 -11   8   2    1.79    0.31 
 -10  -8   2    6.04    0.46 
  10   8  -2    5.76    0.40 
 -10   8   2    6.76    0.46 
  -9  -8   2   34.68    1.03 
   9   8  -2   36.07    0.96 
  -9   8   2   35.23    1.00 
  -8  -8   2    9.25    0.50 
   8   8  -2    9.90    0.47 
  -8   8   2    9.53    0.48 
  -7  -8   2   16.02    0.62 
  -7   8   2   15.15    0.59 
   7   8  -2   15.28    0.57 
  -6  -8   2   21.77    0.69 
   6   8  -2   23.19    0.69 
  -6   8   2   22.91    0.70 
  -5  -8   2    5.65    0.34 
  -5   8   2    5.76    0.28 
   5   8  -2    5.54    0.32 
  -5   8   2    5.60    0.32 
  -4  -8   2    1.45    0.19 
   4   8  -2    1.65    0.21 
  -4   8   2    1.45    0.20 
  -4   8   2    1.27    0.16 
   3  -8  -2   50.83    1.01 
  -3  -8   2   51.45    1.02 
  -3   8   2   51.18    0.97 
   3   8  -2   48.78    1.03 
  -3   8   2   49.48    1.01 
  -2  -8   2   13.33    0.43 
  -2  -8   2   12.59    0.38 
   2  -8  -2   13.78    0.46 
  -2   8   2   12.74    0.42 
   2   8  -2   12.87    0.46 
  -2   8   2   13.02    0.43 
   1  -8  -2    3.09    0.23 
  -1  -8   2    2.62    0.19 
  -1  -8   2    3.13    0.20 
  -1   8   2    3.15    0.21 
   1   8  -2    3.20    0.22 
  -1   8   2    3.01    0.20 
   0  -8   2   32.96    0.73 
   0  -8  -2   32.05    0.76 
   0   8  -2   31.83    0.76 
   0   8   2   32.36    0.73 
  -1  -8  -2   12.32    0.36 
   1  -8   2   12.04    0.42 
  -1  -8  -2   12.69    0.46 
   1   8   2   12.66    0.43 
  -1   8  -2   12.52    0.44 
   2  -8   2   27.65    0.71 
  -2  -8  -2   27.78    0.73 
   2   8   2   28.80    0.70 
  -2   8  -2   30.08    0.72 
   3  -8   2   14.80    0.50 
  -3  -8  -2   15.77    0.54 
   3   8   2   14.61    0.49 
  -3   8  -2   15.34    0.50 
  -4  -8  -2   10.05    0.45 
   4  -8   2    9.50    0.42 
   4   8   2   10.48    0.42 
  -4   8  -2    9.98    0.40 
   5  -8   2    7.51    0.39 
  -5  -8  -2    8.83    0.43 
   5   8   2    7.88    0.38 
  -5   8  -2    9.11    0.38 
   6  -8   2    5.58    0.36 
  -6  -8  -2    5.37    0.36 
  -6   8  -2    5.09    0.30 
   6   8   2    5.25    0.33 
  -7  -8  -2   25.80    0.82 
   7  -8   2   26.29    0.81 
   7   8   2   25.38    0.76 
  -7   8  -2   27.84    0.74 
  -8  -8  -2    1.58    0.26 
   8  -8   2    2.08    0.29 
  -8   8  -2    1.61    0.22 
   8   8   2    1.61    0.24 
  -9  -8  -2    4.26    0.42 
   9  -8   2    3.97    0.39 
   9   8   2    4.41    0.40 
  -9   8  -2    3.94    0.31 
 -10  -8  -2   13.10    0.65 
  10  -8   2   13.25    0.63 
  10   8   2   12.71    0.59 
  11  -8   2   23.42    0.88 
 -11  -8  -2   22.90    0.90 
  11   8   2   24.45    0.86 
  12  -8   2    0.68    0.26 
  12   8   2    0.68    0.24 
 -11  -9   2    1.81    0.34 
 -11   9   2    1.64    0.31 
  11   9  -2    1.99    0.32 
 -10  -9   2    9.47    0.58 
  10   9  -2   11.09    0.56 
 -10   9   2    9.08    0.55 
  -9  -9   2    0.10    0.16 
  -9   9   2    0.07    0.16 
   9   9  -2    0.16    0.15 
  -8  -9   2   18.85    0.73 
  -8   9   2   19.33    0.72 
   8   9  -2   19.97    0.71 
  -7  -9   2    5.38    0.38 
   7   9  -2    5.34    0.37 
  -7   9   2    4.79    0.36 
  -6  -9   2    0.23    0.14 
  -6   9   2    0.10    0.14 
   6   9  -2    0.04    0.12 
  -5  -9   2    2.89    0.29 
  -5   9   2    2.52    0.27 
  -5   9   2    2.91    0.22 
   5   9  -2    2.84    0.29 
  -4  -9   2   89.65    1.60 
   4   9  -2   87.77    1.62 
  -4   9   2   87.94    1.51 
  -4   9   2   89.29    1.60 
  -3  -9   2   18.23    0.56 
  -3   9   2   17.98    0.54 
   3   9  -2   18.76    0.60 
  -3   9   2   17.84    0.56 
  -2  -9   2   14.02    0.43 
   2  -9  -2   13.50    0.48 
   2   9  -2   13.48    0.50 
  -2   9   2   13.36    0.46 
  -2   9   2   13.63    0.46 
  -1  -9   2   26.44    0.64 
   1  -9  -2   25.13    0.68 
   1   9  -2   25.95    0.71 
  -1   9   2   24.96    0.66 
   0  -9   2   10.03    0.38 
   0  -9  -2    9.33    0.35 
   0  -9  -2    8.62    0.39 
   0   9  -2    9.74    0.42 
   0   9   2    9.23    0.38 
  -1  -9  -2   23.11    0.66 
   1  -9   2   22.65    0.63 
  -1   9  -2   23.48    0.66 
   1   9   2   23.25    0.64 
  -2  -9  -2    6.27    0.35 
   2  -9   2    6.93    0.35 
  -2   9  -2    5.93    0.32 
   2   9   2    6.06    0.32 
   3  -9   2    0.58    0.15 
  -3  -9  -2    0.55    0.15 
   3   9   2    0.74    0.16 
  -3   9  -2    0.52    0.15 
  -4  -9  -2   13.32    0.54 
   4  -9   2   13.53    0.53 
   4   9   2   12.87    0.50 
  -4   9  -2   13.38    0.49 
  -5  -9  -2   12.78    0.54 
   5  -9   2   12.98    0.53 
   5   9   2   12.48    0.50 
  -5   9  -2   12.69    0.49 
   6  -9   2   22.91    0.75 
  -6  -9  -2   23.44    0.77 
  -6   9  -2   24.65    0.70 
   6   9   2   22.80    0.72 
  -7  -9  -2   13.43    0.60 
   7  -9   2   14.80    0.62 
  -7   9  -2   13.76    0.52 
   7   9   2   13.15    0.56 
   8  -9   2    0.40    0.20 
  -8  -9  -2    0.52    0.20 
  -8   9  -2    1.03    0.19 
   8   9   2    0.64    0.19 
   9  -9   2   11.44    0.60 
  -9  -9  -2   11.83    0.61 
   9   9   2   10.55    0.54 
  10  -9   2    5.13    0.49 
 -10  -9  -2    5.62    0.47 
  10   9   2    5.21    0.40 
  11  -9   2    2.96    0.41 
 -11  -9  -2    2.62    0.40 
  11   9   2    2.61    0.35 
 -10 -10   2    6.17    0.49 
 -10  10   2    6.37    0.49 
  10  10  -2    7.19    0.48 
  -9 -10   2    5.29    0.49 
  -9  10   2    5.16    0.42 
   9  10  -2    5.56    0.41 
  -8 -10   2    6.92    0.47 
   8  10  -2    7.45    0.46 
  -8  10   2    7.52    0.48 
  -7 -10   2   18.96    0.72 
  -7  10   2   20.41    0.73 
   7  10  -2   20.10    0.72 
  -6 -10   2   19.55    0.69 
  -6  10   2   18.40    0.67 
   6  10  -2   18.22    0.67 
  -5 -10   2    5.87    0.37 
  -5  10   2    5.54    0.35 
   5  10  -2    5.93    0.37 
  -4 -10   2    2.44    0.27 
  -4  10   2    2.61    0.25 
  -4  10   2    2.47    0.26 
   4  10  -2    2.39    0.28 
   3  10  -2   19.77    0.66 
  -3  10   2   18.62    0.58 
  -3  10   2   20.16    0.61 
  -2  10   2    1.60    0.21 
   2  10  -2    1.40    0.21 
  -1 -10   2   24.67    0.65 
   1 -10  -2   24.81    0.67 
   1  10  -2   25.70    0.74 
  -1  10   2   23.80    0.68 
   0 -10   2   56.46    1.13 
   0 -10  -2   56.49    1.18 
   0  10  -2   57.72    1.21 
   0  10   2   55.30    1.15 
   1 -10   2   18.06    0.58 
  -1 -10  -2   18.34    0.61 
   1  10   2   17.13    0.58 
  -1  10  -2   18.37    0.61 
  -2 -10  -2   13.37    0.53 
   2 -10   2   13.48    0.52 
   2  10   2   13.43    0.51 
  -2  10  -2   14.48    0.54 
   3 -10   2   39.49    0.98 
  -3 -10  -2   39.98    1.00 
  -3  10  -2   40.65    0.97 
   3  10   2   40.09    0.97 
   4 -10   2    0.29    0.15 
  -4 -10  -2    0.38    0.16 
   4  10   2    0.49    0.15 
  -4  10  -2    0.34    0.13 
  -5 -10  -2    5.44    0.38 
   5 -10   2    5.66    0.38 
  -5  10  -2    6.25    0.36 
   5  10   2    5.57    0.36 
  -6 -10  -2    9.42    0.51 
   6 -10   2    9.81    0.52 
   6  10   2   10.24    0.49 
  -6  10  -2   10.18    0.46 
   7 -10   2   11.24    0.56 
  -7 -10  -2   10.26    0.55 
   7  10   2   11.18    0.54 
  -7  10  -2   10.30    0.48 
  -8 -10  -2    4.71    0.45 
   8 -10   2    3.77    0.41 
  -8  10  -2    5.02    0.35 
   8  10   2    4.68    0.37 
   9 -10   2    4.53    0.46 
  -9 -10  -2    4.70    0.48 
   9  10   2    4.10    0.41 
  10 -10   2    4.32    0.47 
 -10 -10  -2    4.60    0.49 
  10  10   2    4.20    0.43 
  -9 -11   2    1.63    0.30 
  -9  11   2    1.51    0.30 
   9  11  -2    2.04    0.33 
  -8 -11   2    0.25    0.20 
   8  11  -2    0.10    0.17 
  -8  11   2    0.34    0.20 
  -7 -11   2    3.29    0.38 
   7  11  -2    3.71    0.39 
  -7  11   2    3.64    0.38 
  -6 -11   2    6.03    0.42 
  -6  11   2    6.57    0.42 
   6  11  -2    6.26    0.42 
  -5  11   2   18.39    0.67 
   5  11  -2   18.26    0.69 
   4  11  -2   13.85    0.59 
  -4  11   2   14.79    0.54 
   3 -11  -2   13.69    0.55 
  -3  11   2   13.71    0.52 
   3  11  -2   14.13    0.58 
   2 -11  -2   11.41    0.49 
   2  11  -2   11.47    0.51 
  -2  11   2   12.49    0.49 
   1 -11  -2   17.25    0.57 
  -1  11   2   17.10    0.59 
   1  11  -2   16.87    0.62 
   0 -11   2   16.21    0.56 
   0  11  -2   17.74    0.63 
   0  11   2   17.62    0.60 
   1 -11   2    6.73    0.37 
  -1  11  -2    6.71    0.40 
   1  11   2    6.94    0.39 
   2 -11   2    5.92    0.36 
  -2 -11  -2    6.02    0.38 
   2  11   2    6.07    0.37 
  -2  11  -2    5.61    0.36 
   3 -11   2    1.07    0.20 
  -3 -11  -2    0.84    0.21 
  -3  11  -2    1.26    0.22 
   3  11   2    1.30    0.22 
  -4 -11  -2    6.83    0.43 
   4 -11   2    6.68    0.42 
  -4  11  -2    6.34    0.38 
   4  11   2    6.39    0.39 
  -5 -11  -2    7.75    0.47 
   5 -11   2    7.19    0.44 
   5  11   2    7.89    0.45 
  -5  11  -2    8.11    0.43 
  -6 -11  -2   31.55    0.97 
   6 -11   2   30.26    0.95 
   6  11   2   31.44    0.94 
  -6  11  -2   30.11    0.86 
  -7 -11  -2   14.98    0.69 
   7 -11   2   14.96    0.68 
  -7  11  -2   15.69    0.61 
   7  11   2   15.57    0.67 
   8 -11   2   13.95    0.68 
  -8 -11  -2   13.21    0.67 
   8  11   2   12.86    0.62 
   9 -11   2    2.63    0.39 
  -9 -11  -2    2.76    0.40 
   9  11   2    2.02    0.32 
   8 -12  -2    0.46    0.25 
   8  12  -2    0.93    0.25 
   7 -12  -2    5.11    0.49 
   7  12  -2    4.92    0.46 
   6 -12  -2    4.98    0.41 
   6  12  -2    5.32    0.41 
   5 -12  -2    1.58    0.28 
   5  12  -2    0.75    0.23 
   4 -12  -2    0.74    0.22 
   4  12  -2    0.53    0.19 
   3 -12  -2    6.63    0.42 
   3  12  -2    6.19    0.42 
  -3  12   2    6.68    0.39 
   2 -12  -2    5.75    0.37 
   2  12  -2    5.91    0.41 
  -2  12   2    5.30    0.35 
   1  12  -2   33.44    0.96 
  -1  12   2   35.17    0.93 
   0  12   2    0.23    0.13 
   0  12  -2   -0.02    0.12 
   1 -12   2    1.56    0.24 
  -1  12  -2    1.33    0.24 
   1  12   2    1.09    0.21 
   2 -12   2   13.00    0.55 
  -2  12  -2   12.87    0.57 
   2  12   2   14.05    0.58 
   3 -12   2   10.86    0.53 
  -3  12  -2   10.71    0.52 
   3  12   2   10.24    0.51 
   4 -12   2    5.72    0.42 
  -4 -12  -2    5.72    0.41 
  -4  12  -2    6.06    0.39 
   4  12   2    5.24    0.39 
   5 -12   2    1.88    0.29 
  -5 -12  -2    1.93    0.31 
  -5  12  -2    1.71    0.27 
   5  12   2    1.69    0.27 
   6 -12   2   10.73    0.59 
  -6 -12  -2   10.77    0.59 
   6  12   2   11.09    0.57 
  -6  12  -2   10.83    0.53 
  -7 -12  -2   12.56    0.66 
   7 -12   2   11.57    0.62 
   7  12   2   13.71    0.65 
  -7  12  -2   13.00    0.58 
   8 -12   2    3.56    0.42 
  -8 -12  -2    2.89    0.40 
   8  12   2    2.83    0.37 
   7 -13  -2    4.36    0.48 
   7  13  -2    4.11    0.46 
   6 -13  -2   14.87    0.71 
   6  13  -2   15.14    0.70 
   5 -13  -2    5.03    0.42 
   5  13  -2    5.81    0.44 
   4 -13  -2    0.85    0.23 
   4  13  -2    0.38    0.19 
   3 -13  -2    7.97    0.47 
   3  13  -2    7.72    0.49 
  -3  13   2    7.84    0.45 
   2  13  -2   17.97    0.72 
  -2  13   2   17.33    0.66 
   1  13  -2   10.63    0.55 
  -1  13   2   10.70    0.53 
   0  13  -2    1.88    0.30 
   0  13   2    1.91    0.28 
  -1  13  -2   11.50    0.56 
   1  13   2   11.03    0.54 
   2 -13   2    2.72    0.33 
  -2  13  -2    3.58    0.37 
   2  13   2    3.17    0.36 
   3 -13   2    2.36    0.31 
  -3  13  -2    2.21    0.31 
   3  13   2    2.19    0.31 
   4 -13   2   19.77    0.76 
   4  13   2   19.20    0.76 
  -4  13  -2   19.62    0.73 
   5 -13   2    3.05    0.38 
  -5  13  -2    2.93    0.34 
   5  13   2    2.89    0.36 
  -6 -13  -2    0.60    0.25 
   6 -13   2    0.48    0.24 
   6  13   2    0.79    0.24 
  -6  13  -2    0.39    0.18 
   7 -13   2   14.83    0.73 
  -7 -13  -2   14.32    0.70 
   7  13   2   12.89    0.67 
   5 -14  -2    5.28    0.50 
   5  14  -2    5.01    0.50 
   4  14  -2    1.74    0.31 
   3  14  -2    4.01    0.44 
   2  14  -2   -0.04    0.17 
  -2  14   2    0.27    0.17 
  -1  14   2    1.99    0.30 
   1  14  -2    2.14    0.32 
   0  14   2    9.11    0.51 
   0  14  -2    8.72    0.53 
   1  14   2   23.69    0.85 
  -1  14  -2   23.82    0.85 
  -2  14  -2   12.30    0.62 
   2  14   2   12.35    0.62 
   3 -14   2    8.29    0.51 
   3  14   2    8.74    0.53 
  -3  14  -2    8.21    0.50 
   4 -14   2   10.21    0.58 
  -4  14  -2   11.01    0.58 
   4  14   2   11.87    0.63 
   5 -14   2    2.86    0.40 
   5  14   2    2.44    0.36 
  -5  14  -2    2.82    0.36 
   2  15  -2    7.64    0.54 
  -2  15   2    9.01    0.53 
   1  15  -2    8.66    0.56 
  -1  15   2    9.13    0.54 
   0  15  -2    6.31    0.48 
   0  15   2    5.79    0.44 
   1  15   2    4.53    0.45 
  -1  15  -2    3.81    0.43 
  -2  15  -2    6.10    0.46 
   2  15   2    5.78    0.46 
  14   0  -3    1.31    0.32 
 -12   0   3    0.43    0.17 
 -11   0   3    0.33    0.15 
 -10   0   3   10.72    0.49 
 -10   0   3   10.94    0.44 
  -9   0   3    3.82    0.29 
  -9   0   3    3.74    0.25 
  -8   0   3    0.89    0.14 
  -8   0   3    0.53    0.13 
   7   0  -3   28.56    0.56 
  -7   0   3   28.12    0.70 
  -7   0   3   27.68    0.63 
  -6   0   3   86.16    1.46 
   6   0  -3   88.49    1.26 
  -6   0   3   87.28    1.39 
   5   0  -3    0.18    0.05 
  -5   0   3   -0.01    0.05 
  -5   0   3    0.10    0.05 
  -4   0   3   15.80    0.38 
   4   0  -3   15.90    0.29 
  -4   0   3   15.17    0.39 
  -3   0   3  317.02    4.12 
  -3   0   3  318.27    4.17 
  -2   0   3  158.75    2.13 
  -1   0   3  288.45    3.69 
   1   0  -3  286.18    3.72 
   0   0   3  134.01    1.78 
  -1   0  -3    7.34    0.18 
   1   0   3    6.97    0.18 
  -2   0  -3    4.69    0.16 
  -2   0  -3    4.26    0.15 
   2   0   3    4.30    0.14 
  -3   0  -3  126.99    1.77 
  -3   0  -3  125.06    1.75 
   3   0   3  127.58    1.71 
   4   0   3   48.22    0.76 
  -4   0  -3   47.54    0.82 
   5   0   3    4.92    0.19 
  -5   0  -3    4.80    0.22 
  -5   0  -3    4.96    0.22 
   6   0   3    2.74    0.16 
  -6   0  -3    2.90    0.19 
  -6   0  -3    2.60    0.18 
  -7   0  -3  101.49    1.67 
  -7   0  -3  107.28    1.71 
   7   0   3  106.08    1.59 
  -8   0  -3    1.12    0.16 
  -8   0  -3    1.44    0.18 
  -9   0  -3   14.72    0.52 
  -9   0  -3   15.18    0.53 
  10   0   3    1.95    0.24 
 -10   0  -3    2.38    0.27 
 -11   0  -3    0.81    0.20 
  11   0   3    0.47    0.17 
  12   0   3   14.06    0.59 
 -12   0  -3   15.22    0.64 
  14  -1  -3    1.38    0.33 
 -14  -1   3    1.20    0.29 
  13  -1  -3    1.60    0.31 
 -13  -1   3    1.50    0.30 
  12  -1  -3   10.20    0.56 
 -12  -1   3   10.49    0.56 
 -11  -1   3   10.45    0.52 
 -10  -1   3    6.14    0.39 
 -10   1   3    5.64    0.37 
 -10   1   3    5.93    0.34 
  -9  -1   3    2.43    0.28 
  -9  -1   3    2.43    0.22 
  -9   1   3    2.60    0.22 
  -9   1   3    2.41    0.26 
  -8  -1   3   21.90    0.56 
  -8  -1   3   22.35    0.66 
  -8   1   3   22.22    0.60 
  -8   1   3   22.76    0.64 
  -7  -1   3   33.13    0.79 
  -7  -1   3   33.56    0.70 
   7   1  -3   34.26    0.65 
  -7   1   3   33.92    0.77 
  -7   1   3   33.14    0.73 
   6  -1  -3    7.83    0.23 
  -6  -1   3    8.12    0.33 
  -6  -1   3    7.79    0.28 
   6   1  -3    8.54    0.26 
  -6   1   3    8.67    0.33 
  -6   1   3    8.35    0.30 
   5  -1  -3   28.70    0.48 
  -5  -1   3   27.52    0.62 
  -5  -1   3   27.41    0.56 
   5   1  -3   28.40    0.51 
  -5   1   3   27.94    0.59 
  -4  -1   3   24.39    0.49 
  -4  -1   3   24.04    0.53 
   4   1  -3   24.33    0.43 
  -4   1   3   24.69    0.51 
   3  -1  -3    1.63    0.12 
  -3  -1   3    1.76    0.12 
  -3  -1   3    1.61    0.11 
   3   1  -3    1.57    0.08 
  -3   1   3    1.56    0.11 
   2  -1  -3   90.87    1.31 
  -2  -1   3   88.36    1.28 
  -2  -1   3   89.52    1.27 
  -2   1   3   86.28    1.27 
   1  -1  -3  539.45    7.16 
  -1  -1   3  548.77    7.22 
  -1   1   3  576.27    7.17 
   1   1  -3  588.42    7.15 
   0  -1  -3    8.02    0.23 
   0  -1   3    8.33    0.21 
   0   1   3    8.48    0.20 
   0   1  -3    8.40    0.19 
   1  -1   3  184.73    2.45 
  -1  -1  -3  183.79    2.49 
  -1  -1  -3  188.51    2.39 
  -1   1  -3  187.94    2.39 
   2  -1   3   29.46    0.52 
  -2  -1  -3   30.31    0.53 
  -2  -1  -3   30.39    0.56 
   3  -1   3   10.19    0.27 
  -3  -1  -3    9.87    0.29 
  -3   1  -3    9.66    0.24 
   4  -1   3   73.91    1.14 
  -4  -1  -3   74.91    1.20 
  -4  -1  -3   72.12    1.16 
  -4   1  -3   74.40    1.13 
   4   1   3   77.52    1.06 
  -4   1  -3   74.83    1.16 
  -5  -1  -3    4.30    0.21 
   5  -1   3    3.82    0.19 
  -5  -1  -3    3.71    0.20 
   5   1   3    4.32    0.16 
  -5   1  -3    3.86    0.20 
  -5   1  -3    4.39    0.19 
  -6  -1  -3   19.89    0.53 
  -6  -1  -3   20.01    0.52 
   6  -1   3   19.35    0.48 
  -6   1  -3   20.74    0.52 
  -6   1  -3   19.21    0.48 
   6   1   3   20.93    0.42 
  -7  -1  -3   23.03    0.62 
   7  -1   3   22.66    0.55 
  -7   1  -3   24.25    0.60 
  -7   1  -3   23.91    0.58 
   8  -1   3   26.50    0.63 
  -8  -1  -3   27.67    0.72 
  -8   1  -3   26.68    0.67 
  -8   1  -3   27.23    0.68 
   8   1   3   26.86    0.70 
  -9  -1  -3   43.83    1.01 
  -9   1  -3   42.74    0.96 
   9   1   3   44.08    0.98 
  -9   1  -3   43.18    0.96 
 -10  -1  -3   25.07    0.77 
 -10   1  -3   24.86    0.73 
 -10   1  -3   25.70    0.74 
  10   1   3   26.08    0.74 
 -11  -1  -3   -0.03    0.12 
  11   1   3    0.19    0.14 
  12  -1   3   18.82    0.69 
 -12  -1  -3   19.70    0.74 
  12   1   3   21.14    0.72 
 -13  -1  -3   20.36    0.79 
  13   1   3   19.19    0.72 
  14  -2  -3    4.77    0.50 
 -14  -2   3    5.21    0.51 
  13  -2  -3    1.05    0.27 
 -13  -2   3    1.06    0.26 
  12  -2  -3    1.45    0.28 
 -12  -2   3    1.60    0.28 
  11  -2  -3    7.41    0.44 
 -11  -2   3    7.29    0.46 
 -11   2   3    8.45    0.43 
 -10  -2   3   22.50    0.75 
  10  -2  -3   22.23    0.73 
 -10   2   3   22.68    0.69 
  -9  -2   3   21.55    0.69 
   9  -2  -3   19.79    0.65 
  -9   2   3   20.81    0.62 
  -8  -2   3    4.70    0.31 
   8  -2  -3    4.62    0.30 
  -8  -2   3    4.73    0.24 
  -8   2   3    4.92    0.29 
   8   2  -3    5.27    0.25 
   7  -2  -3   51.58    1.06 
  -7  -2   3   51.94    1.07 
  -7  -2   3   52.63    0.94 
  -7   2   3   53.89    1.03 
   7   2  -3   55.26    0.94 
  -6  -2   3   17.25    0.43 
   6  -2  -3   18.38    0.51 
  -6  -2   3   17.41    0.51 
  -6   2   3   17.77    0.37 
  -6   2   3   17.23    0.48 
   6   2  -3   16.96    0.41 
  -5  -2   3    1.21    0.14 
  -5  -2   3    0.95    0.11 
   5  -2  -3    0.88    0.13 
   5   2  -3    0.85    0.10 
  -5   2   3    0.79    0.11 
  -5   2   3    0.82    0.07 
   4  -2  -3   59.85    1.03 
  -4  -2   3   59.74    1.03 
  -4  -2   3   60.88    0.95 
   4   2  -3   59.09    0.91 
  -3  -2   3   42.68    0.70 
   3  -2  -3   41.96    0.76 
  -3  -2   3   41.43    0.73 
   3   2  -3   41.04    0.66 
  -3   2   3   39.99    0.72 
   2  -2  -3  350.37    4.62 
  -2  -2   3  356.14    4.55 
  -2  -2   3  353.52    4.57 
  -2   2   3  353.70    4.57 
   2   2  -3  354.86    4.42 
   1  -2  -3  145.47    2.02 
  -1  -2   3  145.01    1.97 
  -1  -2   3  146.34    1.94 
   1   2  -3  145.75    1.91 
  -1   2   3  147.28    1.97 
   0  -2  -3   46.43    0.77 
   0  -2   3   45.19    0.73 
   0   2   3   45.99    0.66 
   0   2   3   46.14    0.69 
   0   2  -3   46.58    0.71 
   1  -2   3  147.15    2.04 
  -1  -2  -3  153.32    2.11 
   1   2   3  150.86    1.97 
   2  -2   3   87.26    1.30 
  -2  -2  -3   90.70    1.36 
   2   2   3   87.96    1.26 
  -2   2  -3   88.77    1.27 
  -3  -2  -3  340.60    4.50 
   3  -2   3  340.41    4.43 
  -3   2  -3  338.35    4.34 
   3   2   3  335.99    4.34 
   4  -2   3    3.79    0.19 
  -4  -2  -3    3.79    0.21 
   4   2   3    4.31    0.20 
  -4   2  -3    4.40    0.20 
  -4   2  -3    4.10    0.15 
   5  -2   3   33.22    0.67 
  -5  -2  -3   32.94    0.72 
   5   2   3   32.50    0.68 
  -5   2  -3   33.30    0.61 
  -5   2  -3   33.51    0.67 
   6  -2   3   21.78    0.54 
  -6  -2  -3   22.33    0.59 
  -6   2  -3   22.65    0.50 
  -6   2  -3   22.14    0.55 
   6   2   3   22.46    0.57 
   7  -2   3   29.63    0.68 
  -7  -2  -3   29.23    0.73 
   7   2   3   30.29    0.71 
  -7   2  -3   29.38    0.69 
  -7   2  -3   29.54    0.65 
   8  -2   3   20.02    0.56 
  -8  -2  -3   19.24    0.61 
   8   2   3   20.16    0.59 
  -8   2  -3   20.77    0.58 
  -8   2  -3   20.35    0.55 
  -9  -2  -3   10.50    0.46 
   9  -2   3    9.44    0.39 
  -9   2  -3   10.17    0.40 
   9   2   3   10.12    0.43 
  -9   2  -3    9.46    0.41 
 -10  -2  -3    0.77    0.19 
  10   2   3    0.66    0.17 
 -10   2  -3    0.88    0.19 
 -11  -2  -3   14.10    0.61 
 -11   2  -3   13.42    0.54 
  11   2   3   12.23    0.53 
 -12  -2  -3    1.49    0.28 
 -12   2  -3    0.95    0.22 
  12   2   3    1.02    0.21 
 -13  -2  -3   22.16    0.84 
  13   2   3   20.08    0.75 
 -14  -2  -3    8.32    0.56 
 -13  -3   3    6.91    0.50 
  12  -3  -3    3.03    0.36 
 -12  -3   3    3.10    0.38 
 -12   3   3    3.38    0.35 
  11  -3  -3    2.64    0.32 
 -11  -3   3    3.29    0.36 
 -11   3   3    2.90    0.32 
  10  -3  -3   47.29    1.13 
 -10  -3   3   46.43    1.16 
 -10   3   3   46.12    1.08 
   9  -3  -3    0.73    0.17 
  -9  -3   3    0.78    0.18 
  -9   3   3    0.60    0.15 
   8  -3  -3   18.93    0.60 
  -8  -3   3   20.02    0.64 
   8   3  -3   18.97    0.52 
  -8   3   3   20.28    0.60 
  -7  -3   3    8.47    0.30 
  -7  -3   3    8.46    0.38 
   7  -3  -3    8.81    0.38 
  -7   3   3    8.61    0.36 
   7   3  -3    8.58    0.32 
   6  -3  -3    0.30    0.10 
  -6  -3   3    0.28    0.10 
  -6  -3   3    0.23    0.07 
  -6   3   3    0.47    0.11 
  -6   3   3    0.36    0.07 
   6   3  -3    0.42    0.09 
   5  -3  -3   80.28    1.37 
  -5  -3   3   81.44    1.38 
  -5  -3   3   82.44    1.25 
  -5   3   3   82.48    1.36 
  -5   3   3   84.06    1.15 
   5   3  -3   82.74    1.26 
   4  -3  -3   49.39    0.90 
  -4  -3   3   47.85    0.89 
  -4  -3   3   48.25    0.81 
  -4   3   3   48.06    0.88 
   4   3  -3   49.72    0.82 
  -4   3   3   48.36    0.71 
  -3  -3   3   69.30    1.06 
   3  -3  -3   69.74    1.14 
  -3  -3   3   68.64    1.11 
  -3   3   3   71.48    0.96 
   3   3  -3   69.48    1.06 
  -3   3   3   69.69    1.12 
   2  -3  -3   29.72    0.60 
  -2  -3   3   29.94    0.55 
  -2  -3   3   30.45    0.55 
   2   3  -3   30.70    0.55 
  -2   3   3   30.79    0.48 
  -2   3   3   30.67    0.58 
  -1  -3   3   43.08    0.72 
  -1  -3   3   43.72    0.68 
   1  -3  -3   44.05    0.77 
  -1   3   3   43.18    0.65 
  -1   3   3   43.41    0.71 
   1   3  -3   42.97    0.71 
   0  -3   3  105.24    1.51 
   0  -3  -3  107.03    1.57 
   0   3   3  104.99    1.45 
   0   3  -3  105.88    1.48 
   0   3   3  105.01    1.43 
  -1  -3  -3  135.90    1.97 
   1  -3   3  136.23    1.91 
  -1   3  -3  137.43    1.87 
   1   3   3  135.18    1.83 
   2  -3   3  509.41    6.53 
  -2  -3  -3  501.60    6.62 
   2   3   3  510.48    6.37 
  -2   3  -3  512.30    6.39 
  -3  -3  -3    9.34    0.32 
   3  -3   3    8.25    0.29 
  -3   3  -3    9.63    0.29 
  -4  -3  -3    3.59    0.22 
   4  -3   3    3.56    0.20 
  -4   3  -3    3.49    0.18 
  -4   3  -3    3.61    0.13 
   4   3   3    3.31    0.19 
  -5  -3  -3   30.75    0.71 
   5  -3   3   30.44    0.67 
  -5   3  -3   30.18    0.64 
  -5   3  -3   30.73    0.55 
   5   3   3   31.21    0.67 
  -6  -3  -3   46.41    0.97 
   6  -3   3   46.32    0.92 
  -6   3  -3   47.86    0.81 
   6   3   3   46.98    0.92 
  -6   3  -3   46.71    0.90 
   7  -3   3   38.44    0.84 
  -7  -3  -3   38.16    0.90 
   7   3   3   38.64    0.85 
  -7   3  -3   39.47    0.83 
  -7   3  -3   39.87    0.76 
  -8  -3  -3    4.49    0.31 
   8  -3   3    4.94    0.29 
  -8   3  -3    5.84    0.30 
   8   3   3    4.70    0.29 
   9  -3   3   14.74    0.52 
  -9  -3  -3   14.55    0.57 
  -9   3  -3   14.70    0.51 
   9   3   3   14.25    0.52 
  10  -3   3   17.50    0.60 
 -10  -3  -3   19.62    0.70 
  10   3   3   18.25    0.63 
 -10   3  -3   19.15    0.61 
 -11  -3  -3   13.27    0.60 
  11   3   3   12.40    0.53 
 -11   3  -3   13.17    0.54 
 -12  -3  -3    1.12    0.25 
  12   3   3    0.96    0.22 
 -13  -3  -3    3.08    0.39 
  13   3   3    2.89    0.35 
 -13  -4   3    0.61    0.24 
 -13   4   3    0.91    0.25 
 -12  -4   3    7.91    0.51 
 -12   4   3    7.54    0.47 
  11  -4  -3    2.31    0.31 
 -11  -4   3    2.09    0.30 
 -11   4   3    2.59    0.31 
 -10  -4   3    8.81    0.49 
  10  -4  -3    8.92    0.47 
 -10   4   3    8.58    0.44 
   9  -4  -3   60.22    1.28 
  -9  -4   3   62.80    1.37 
   9   4  -3   62.14    1.18 
  -9   4   3   61.70    1.28 
   8  -4  -3   20.42    0.63 
  -8  -4   3   20.31    0.66 
   8   4  -3   20.80    0.57 
  -8   4   3   20.43    0.63 
   7  -4  -3   49.93    1.04 
  -7  -4   3   48.66    1.07 
  -7   4   3   50.40    1.04 
   7   4  -3   50.78    0.96 
  -6  -4   3    3.51    0.18 
  -6  -4   3    3.70    0.25 
   6  -4  -3    3.51    0.24 
  -6   4   3    3.88    0.24 
   6   4  -3    3.85    0.22 
  -5  -4   3   22.59    0.48 
  -5  -4   3   21.88    0.58 
   5  -4  -3   21.50    0.56 
  -5   4   3   22.01    0.56 
   5   4  -3   22.59    0.52 
  -5   4   3   22.44    0.43 
  -4  -4   3   11.97    0.31 
   4  -4  -3   11.88    0.38 
  -4  -4   3   11.67    0.37 
   4   4  -3   11.34    0.34 
  -4   4   3   11.24    0.27 
  -4   4   3   10.79    0.36 
  -3  -4   3   29.69    0.61 
   3  -4  -3   30.20    0.64 
  -3  -4   3   29.39    0.57 
  -3   4   3   31.49    0.52 
  -3   4   3   30.91    0.63 
   3   4  -3   30.87    0.60 
   2  -4  -3    8.78    0.30 
  -2  -4   3    8.72    0.26 
  -2  -4   3    8.21    0.26 
  -2   4   3    8.45    0.28 
  -2   4   3    8.85    0.23 
   2   4  -3    8.06    0.27 
  -1  -4   3   61.81    0.92 
  -1  -4   3   60.35    0.97 
   1  -4  -3   61.95    1.04 
   1   4  -3   60.77    0.98 
  -1   4   3   60.19    0.96 
  -1   4   3   60.76    0.91 
   0  -4   3   57.62    0.95 
   0  -4  -3   60.65    1.02 
   0   4   3   58.53    0.90 
   0   4   3   58.28    0.89 
   0   4  -3   57.80    0.95 
  -1  -4  -3  178.92    2.54 
   1  -4   3  174.42    2.47 
   1   4   3  179.99    2.33 
   1   4   3  178.40    2.39 
  -1   4  -3  179.16    2.42 
   2  -4   3  273.39    3.72 
  -2  -4  -3  276.52    3.80 
  -2   4  -3  277.14    3.63 
   2   4   3  280.93    3.62 
   3  -4   3   11.50    0.36 
  -3  -4  -3   11.76    0.39 
   3   4   3   11.22    0.34 
  -4  -4  -3   16.97    0.50 
   4  -4   3   17.44    0.48 
   4   4   3   17.22    0.45 
  -4   4  -3   17.16    0.45 
   5  -4   3   40.09    0.84 
  -5  -4  -3   38.84    0.87 
   5   4   3   39.51    0.81 
  -5   4  -3   41.39    0.80 
  -6  -4  -3   41.10    0.93 
   6  -4   3   42.06    0.89 
   6   4   3   39.79    0.86 
  -6   4  -3   41.19    0.84 
   7  -4   3   13.23    0.46 
  -7  -4  -3   12.79    0.49 
  -7   4  -3   12.63    0.43 
   7   4   3   12.22    0.45 
  -8  -4  -3    0.80    0.17 
   8  -4   3    0.83    0.17 
  -8   4  -3    0.90    0.16 
   8   4   3    0.82    0.16 
  -9  -4  -3   51.96    1.21 
   9  -4   3   51.93    1.13 
   9   4   3   50.07    1.11 
  -9   4  -3   51.73    1.09 
  10  -4   3    2.60    0.29 
 -10  -4  -3    2.49    0.31 
  10   4   3    2.36    0.27 
 -10   4  -3    2.42    0.27 
  11  -4   3   21.37    0.72 
 -11  -4  -3   21.53    0.79 
 -11   4  -3   21.63    0.70 
  11   4   3   21.83    0.73 
 -12  -4  -3    1.69    0.30 
  12   4   3    1.19    0.25 
 -13  -4  -3    6.62    0.51 
  13   4   3    5.93    0.44 
 -13  -5   3    3.53    0.44 
 -13   5   3    3.33    0.38 
 -12  -5   3    1.62    0.31 
 -12   5   3    2.11    0.32 
 -11  -5   3   11.94    0.60 
 -11   5   3   11.31    0.55 
  10  -5  -3    4.50    0.34 
 -10  -5   3    3.47    0.37 
 -10   5   3    4.41    0.35 
  -9  -5   3    7.49    0.43 
   9  -5  -3    7.20    0.40 
  -9   5   3    6.67    0.39 
   9   5  -3    6.50    0.35 
  -8  -5   3    0.74    0.18 
   8  -5  -3    1.13    0.19 
   8   5  -3    1.16    0.18 
  -8   5   3    1.19    0.19 
  -7  -5   3   41.77    0.98 
   7  -5  -3   41.43    0.93 
  -7   5   3   40.61    0.94 
   7   5  -3   40.92    0.87 
   6  -5  -3    8.86    0.37 
  -6  -5   3    7.85    0.37 
  -6   5   3    7.59    0.35 
   6   5  -3    8.28    0.34 
  -5  -5   3   28.24    0.57 
  -5  -5   3   28.43    0.69 
   5  -5  -3   28.00    0.68 
  -5   5   3   28.36    0.69 
   5   5  -3   27.96    0.64 
  -5   5   3   28.64    0.55 
  -4  -5   3   78.36    1.22 
   4  -5  -3   81.30    1.35 
  -4  -5   3   79.16    1.34 
   4   5  -3   79.48    1.29 
  -4   5   3   77.96    1.34 
  -4   5   3   78.07    1.17 
  -3  -5   3   74.05    1.17 
  -3  -5   3   76.84    1.24 
   3  -5  -3   75.18    1.28 
  -3   5   3   75.72    1.26 
   3   5  -3   74.61    1.22 
  -3   5   3   78.30    1.14 
  -2  -5   3   58.06    0.97 
   2  -5  -3   60.29    1.06 
  -2  -5   3   59.70    0.98 
  -2   5   3   61.30    0.94 
   2   5  -3   60.43    1.02 
  -2   5   3   60.35    1.02 
   1  -5  -3   52.76    0.97 
  -1  -5   3   52.57    0.84 
  -1  -5   3   53.50    0.90 
   1   5  -3   53.10    0.92 
  -1   5   3   52.99    0.86 
  -1   5   3   52.46    0.89 
   0  -5   3   51.85    0.77 
   0  -5   3   52.19    0.90 
   0  -5  -3   52.39    0.96 
   0   5   3   50.61    0.85 
   0   5   3   50.57    0.83 
   0   5  -3   51.22    0.90 
  -1  -5  -3   77.51    1.31 
   1  -5   3   77.95    1.25 
  -1   5  -3   77.10    1.23 
   1   5   3   75.68    1.19 
   1   5   3   78.27    1.12 
  -2  -5  -3  137.96    2.13 
   2  -5   3  139.28    2.07 
   2   5   3  140.54    2.00 
  -2   5  -3  139.62    2.02 
   2   5   3  140.97    1.84 
  -3  -5  -3    1.78    0.19 
   3  -5   3    2.03    0.16 
   3   5   3    2.28    0.16 
  -3   5  -3    2.16    0.16 
   4  -5   3   12.03    0.42 
  -4  -5  -3   13.25    0.46 
  -4   5  -3   13.34    0.40 
   4   5   3   13.12    0.41 
   5  -5   3    1.36    0.17 
  -5  -5  -3    1.71    0.21 
  -5   5  -3    1.51    0.17 
   5   5   3    1.66    0.19 
  -6  -5  -3   15.24    0.53 
   6  -5   3   15.81    0.52 
   6   5   3   15.17    0.50 
  -6   5  -3   16.32    0.48 
  -7  -5  -3   16.65    0.60 
   7  -5   3   17.75    0.57 
   7   5   3   17.02    0.55 
  -7   5  -3   17.66    0.53 
   8  -5   3   28.90    0.79 
  -8  -5  -3   28.78    0.84 
   8   5   3   27.53    0.76 
  -8   5  -3   30.05    0.75 
  -9  -5  -3   14.02    0.59 
   9  -5   3   13.75    0.55 
   9   5   3   14.62    0.56 
  -9   5  -3   14.04    0.52 
  10  -5   3   14.21    0.58 
 -10  -5  -3   14.54    0.63 
 -10   5  -3   15.11    0.56 
  10   5   3   14.60    0.59 
  11  -5   3    8.44    0.48 
 -11  -5  -3    9.58    0.55 
 -11   5  -3    8.06    0.44 
  11   5   3    7.73    0.46 
 -12  -5  -3    3.45    0.40 
  12   5   3    3.27    0.36 
 -13  -5  -3    3.54    0.44 
  13   5   3    3.36    0.39 
 -13   6   3    0.02    0.20 
 -12  -6   3    8.72    0.57 
 -12   6   3   10.02    0.56 
 -11  -6   3   10.85    0.59 
 -11   6   3   10.66    0.56 
 -10  -6   3   11.99    0.59 
 -10   6   3   14.10    0.61 
  -9  -6   3   11.59    0.55 
   9   6  -3   11.25    0.47 
  -9   6   3   12.47    0.54 
  -8  -6   3   50.61    1.17 
   8  -6  -3   48.31    1.09 
  -8   6   3   49.50    1.13 
   8   6  -3   48.99    1.05 
   7  -6  -3   11.83    0.47 
  -7  -6   3   12.26    0.50 
  -7   6   3   12.21    0.50 
   7   6  -3   12.00    0.45 
  -6  -6   3   70.22    1.36 
   6  -6  -3   72.34    1.34 
  -6   6   3   71.61    1.36 
   6   6  -3   72.89    1.30 
  -5  -6   3   39.81    0.88 
   5  -6  -3   38.88    0.86 
  -5   6   3   38.95    0.72 
   5   6  -3   38.89    0.84 
  -5   6   3   38.88    0.87 
   4  -6  -3   51.13    1.01 
  -4  -6   3   51.11    0.88 
  -4  -6   3   50.32    0.99 
   4   6  -3   51.53    0.98 
  -4   6   3   50.20    1.00 
  -4   6   3   52.34    0.88 
  -3  -6   3   32.19    0.64 
  -3  -6   3   33.25    0.70 
   3  -6  -3   32.62    0.73 
  -3   6   3   32.71    0.71 
   3   6  -3   32.24    0.71 
  -3   6   3   32.58    0.63 
  -2  -6   3   10.77    0.32 
   2  -6  -3   10.80    0.38 
  -2  -6   3   11.39    0.34 
   2   6  -3   10.54    0.36 
  -2   6   3    9.78    0.33 
  -2   6   3   10.77    0.32 
  -1  -6   3   16.27    0.42 
   1  -6  -3   15.36    0.46 
  -1  -6   3   15.68    0.37 
   1   6  -3   15.31    0.44 
  -1   6   3   15.46    0.41 
  -1   6   3   15.14    0.40 
   0  -6  -3   10.86    0.39 
   0  -6   3   10.75    0.27 
   0  -6   3   11.84    0.36 
   0   6   3   11.25    0.34 
   0   6   3   10.78    0.31 
   0   6  -3   10.82    0.36 
   1  -6   3   20.43    0.52 
  -1  -6  -3   20.56    0.57 
  -1   6  -3   22.08    0.54 
   1   6   3   20.98    0.50 
   1   6   3   21.45    0.43 
   2  -6   3   36.22    0.77 
  -2  -6  -3   34.82    0.80 
   2   6   3   36.44    0.73 
  -2   6  -3   36.09    0.75 
   3  -6   3    5.59    0.28 
  -3  -6  -3    5.94    0.32 
   3   6   3    5.15    0.25 
  -3   6  -3    5.22    0.26 
  -4  -6  -3    0.77    0.15 
   4  -6   3    0.76    0.15 
   4   6   3    1.01    0.14 
  -4   6  -3    1.30    0.16 
   5  -6   3   81.15    1.48 
  -5  -6  -3   82.33    1.53 
  -5   6  -3   83.64    1.41 
   5   6   3   82.04    1.43 
  -6  -6  -3   19.39    0.63 
   6  -6   3   19.37    0.61 
  -6   6  -3   18.75    0.55 
   6   6   3   18.48    0.57 
   7  -6   3    1.22    0.21 
  -7  -6  -3    1.44    0.23 
   7   6   3    2.09    0.24 
  -7   6  -3    2.13    0.22 
   8  -6   3    5.99    0.38 
  -8  -6  -3    6.04    0.39 
  -8   6  -3    5.71    0.32 
   8   6   3    6.16    0.36 
   9  -6   3    7.01    0.42 
  -9  -6  -3    6.52    0.43 
   9   6   3    7.13    0.40 
  -9   6  -3    6.34    0.36 
 -10  -6  -3    2.91    0.35 
  10  -6   3    3.30    0.35 
 -10   6  -3    2.87    0.30 
  10   6   3    2.75    0.31 
 -11  -6  -3   12.69    0.63 
  11  -6   3   12.05    0.58 
  11   6   3   12.26    0.57 
  12  -6   3    1.50    0.29 
 -12  -6  -3    1.63    0.31 
  12   6   3    1.56    0.27 
 -12  -7   3    5.92    0.55 
 -12   7   3    4.79    0.47 
 -11  -7   3    6.53    0.50 
 -11   7   3    6.15    0.45 
 -10  -7   3    4.79    0.41 
 -10   7   3    6.31    0.42 
  10   7  -3    6.01    0.38 
  -9  -7   3    3.69    0.37 
   9   7  -3    3.78    0.31 
  -9   7   3    3.20    0.34 
  -8  -7   3    0.20    0.15 
   8   7  -3    0.23    0.13 
  -8   7   3    0.08    0.13 
  -7  -7   3   49.17    1.13 
  -7   7   3   49.81    1.14 
   7   7  -3   49.09    1.06 
  -6  -7   3   19.46    0.63 
   6  -7  -3   20.53    0.62 
  -6   7   3   19.58    0.63 
   6   7  -3   20.57    0.62 
   5  -7  -3   21.81    0.63 
  -5  -7   3   22.07    0.64 
   5   7  -3   22.48    0.63 
  -5   7   3   22.87    0.65 
  -4  -7   3   25.46    0.56 
  -4  -7   3   26.28    0.66 
   4  -7  -3   25.51    0.67 
   4   7  -3   25.01    0.65 
  -4   7   3   23.95    0.65 
  -4   7   3   25.30    0.57 
  -3  -7   3    4.83    0.25 
  -3  -7   3    4.85    0.22 
   3  -7  -3    4.63    0.28 
  -3   7   3    4.32    0.22 
  -3   7   3    4.22    0.25 
   3   7  -3    4.47    0.26 
  -2  -7   3   41.36    0.79 
  -2  -7   3   40.90    0.78 
   2  -7  -3   41.31    0.88 
  -2   7   3   39.62    0.82 
   2   7  -3   38.30    0.84 
  -2   7   3   42.00    0.79 
  -1  -7   3   15.79    0.44 
  -1  -7   3   15.55    0.39 
   1  -7  -3   14.99    0.48 
  -1   7   3   14.89    0.42 
   1   7  -3   14.92    0.47 
  -1   7   3   15.34    0.43 
   0  -7   3   24.15    0.58 
   0  -7  -3   23.21    0.63 
   0   7   3   23.74    0.56 
   0   7  -3   23.70    0.61 
   0   7   3   23.27    0.51 
  -1  -7  -3   20.72    0.59 
   1  -7   3   20.96    0.55 
  -1   7  -3   19.85    0.55 
   1   7   3   20.42    0.44 
   1   7   3   19.62    0.52 
   2  -7   3    5.60    0.29 
  -2  -7  -3    5.81    0.33 
   2   7   3    5.92    0.28 
  -2   7  -3    6.05    0.29 
  -3  -7  -3    4.66    0.30 
   3  -7   3    4.87    0.27 
   3   7   3    4.93    0.27 
  -3   7  -3    5.10    0.27 
   4  -7   3    1.66    0.20 
  -4  -7  -3    1.59    0.21 
   4   7   3    1.13    0.16 
  -4   7  -3    1.19    0.17 
  -5  -7  -3   27.03    0.77 
   5  -7   3   27.51    0.75 
  -5   7  -3   26.80    0.68 
   5   7   3   26.68    0.70 
   6  -7   3    5.68    0.34 
  -6  -7  -3    5.31    0.35 
  -6   7  -3    5.14    0.29 
   6   7   3    5.43    0.32 
  -7  -7  -3   15.85    0.62 
   7  -7   3   16.47    0.61 
   7   7   3   16.28    0.58 
  -7   7  -3   16.72    0.55 
   8  -7   3    9.24    0.47 
  -8  -7  -3   10.15    0.52 
   8   7   3    9.61    0.46 
  -8   7  -3   10.56    0.45 
   9  -7   3   18.90    0.71 
  -9  -7  -3   18.32    0.72 
  -9   7  -3   19.58    0.65 
   9   7   3   18.85    0.68 
 -10  -7  -3    2.88    0.36 
  10  -7   3    2.54    0.34 
  10   7   3    2.42    0.31 
 -10   7  -3    3.19    0.32 
  11  -7   3    5.18    0.43 
 -11  -7  -3    5.09    0.49 
  11   7   3    5.60    0.42 
  12  -7   3    1.62    0.31 
 -12  -7  -3    1.66    0.34 
  12   7   3    1.59    0.29 
 -12   8   3    2.13    0.35 
 -11  -8   3    4.61    0.47 
 -11   8   3    4.59    0.46 
 -10  -8   3   17.77    0.75 
 -10   8   3   18.99    0.75 
  10   8  -3   19.35    0.71 
  -9  -8   3    5.17    0.40 
  -9   8   3    5.04    0.39 
   9   8  -3    5.38    0.38 
  -8  -8   3    4.62    0.36 
  -8   8   3    4.01    0.33 
   8   8  -3    4.45    0.34 
  -7  -8   3   25.99    0.79 
   7   8  -3   24.45    0.74 
  -7   8   3   26.07    0.79 
  -6  -8   3   22.13    0.70 
   6   8  -3   21.84    0.67 
  -6   8   3   21.44    0.68 
  -5  -8   3   14.16    0.52 
   5  -8  -3   14.81    0.53 
  -5   8   3   13.40    0.51 
   5   8  -3   14.46    0.52 
  -4  -8   3    9.87    0.41 
   4  -8  -3   10.82    0.44 
  -4   8   3   10.25    0.36 
   4   8  -3    9.11    0.41 
  -4   8   3    9.61    0.41 
   3  -8  -3  103.68    1.76 
  -3  -8   3  103.52    1.61 
  -3  -8   3  104.49    1.70 
   3   8  -3  104.10    1.75 
  -3   8   3  104.04    1.72 
  -3   8   3  103.29    1.63 
  -2  -8   3    6.86    0.29 
  -2  -8   3    6.93    0.30 
   2  -8  -3    6.16    0.33 
  -2   8   3    6.08    0.30 
   2   8  -3    6.39    0.33 
  -2   8   3    6.39    0.29 
  -1  -8   3   11.81    0.40 
   1  -8  -3   12.32    0.45 
   1   8  -3   12.54    0.46 
  -1   8   3   12.68    0.41 
  -1   8   3   13.09    0.40 
   0  -8   3   32.03    0.73 
   0  -8  -3   31.47    0.78 
   0   8   3   32.81    0.67 
   0   8  -3   31.87    0.77 
   0   8   3   32.20    0.72 
  -1  -8  -3    8.03    0.38 
   1  -8   3    7.90    0.35 
  -1   8  -3    7.52    0.34 
   1   8   3    7.43    0.32 
   2  -8   3    1.50    0.19 
  -2  -8  -3    1.41    0.21 
   2   8   3    1.47    0.18 
  -2   8  -3    1.62    0.19 
  -3  -8  -3   19.22    0.62 
   3  -8   3   19.18    0.59 
  -3   8  -3   18.63    0.57 
   3   8   3   19.17    0.57 
   4  -8   3   24.15    0.70 
  -4  -8  -3   23.68    0.73 
  -4   8  -3   25.03    0.67 
   4   8   3   23.98    0.67 
   5  -8   3   22.18    0.69 
  -5  -8  -3   23.66    0.74 
   5   8   3   23.54    0.68 
  -5   8  -3   24.42    0.67 
  -6  -8  -3   10.86    0.51 
   6  -8   3   11.13    0.50 
  -6   8  -3   10.87    0.44 
   6   8   3   10.38    0.46 
   7  -8   3    2.97    0.31 
  -7  -8  -3    3.24    0.35 
   7   8   3    2.55    0.28 
  -7   8  -3    2.72    0.27 
  -8  -8  -3    8.09    0.48 
   8  -8   3    7.48    0.44 
  -8   8  -3    7.78    0.41 
   8   8   3    8.18    0.44 
   9  -8   3   13.21    0.61 
  -9  -8  -3   12.19    0.60 
  -9   8  -3   11.69    0.51 
   9   8   3   11.81    0.56 
 -10  -8  -3    3.30    0.39 
  10  -8   3    2.49    0.34 
  10   8   3    2.53    0.32 
  11  -8   3    1.06    0.27 
 -11  -8  -3    1.11    0.28 
  11   8   3    1.64    0.29 
  12  -8   3    0.66    0.25 
  12   8   3    0.29    0.20 
 -11  -9   3    0.12    0.21 
 -11   9   3   -0.06    0.19 
 -10  -9   3    0.38    0.22 
 -10   9   3    0.47    0.22 
  10   9  -3    0.81    0.23 
  -9  -9   3   -0.08    0.16 
   9   9  -3    0.24    0.17 
  -9   9   3    0.32    0.19 
  -8  -9   3   13.62    0.61 
  -8   9   3   13.45    0.61 
   8   9  -3   13.14    0.57 
  -7  -9   3    7.17    0.43 
  -7   9   3    7.26    0.42 
   7   9  -3    7.82    0.42 
  -6  -9   3    1.72    0.25 
  -6   9   3    2.16    0.27 
   6   9  -3    2.22    0.27 
  -5  -9   3   11.52    0.49 
   5   9  -3   12.44    0.51 
  -5   9   3   12.41    0.51 
  -4  -9   3    5.94    0.34 
  -4   9   3    5.75    0.34 
   4   9  -3    5.63    0.34 
  -4   9   3    6.39    0.31 
   3  -9  -3    3.70    0.30 
  -3  -9   3    3.04    0.24 
   3   9  -3    3.15    0.26 
  -3   9   3    3.16    0.23 
  -3   9   3    3.16    0.25 
  -2  -9   3   35.58    0.78 
   2  -9  -3   35.09    0.86 
   2   9  -3   37.15    0.88 
  -2   9   3   36.62    0.82 
  -2   9   3   35.47    0.80 
  -1  -9   3    2.10    0.21 
   1  -9  -3    1.85    0.23 
   1   9  -3    1.92    0.23 
  -1   9   3    2.04    0.21 
  -1   9   3    1.84    0.19 
   0  -9   3   13.99    0.47 
   0  -9  -3   13.86    0.51 
   0   9   3   14.19    0.48 
   0   9  -3   13.65    0.51 
  -1  -9  -3   11.18    0.47 
   1  -9   3   11.25    0.43 
   1   9   3   11.26    0.43 
  -1   9  -3   10.70    0.45 
  -2  -9  -3   15.25    0.56 
   2  -9   3   13.44    0.51 
  -2   9  -3   15.23    0.53 
   2   9   3   15.06    0.51 
  -3  -9  -3    0.47    0.17 
   3  -9   3    0.57    0.16 
  -3   9  -3    0.67    0.15 
   3   9   3    0.95    0.17 
  -4  -9  -3    5.87    0.37 
   4  -9   3    5.36    0.34 
  -4   9  -3    5.14    0.32 
   4   9   3    5.71    0.33 
  -5  -9  -3   12.90    0.56 
   5  -9   3   13.10    0.54 
   5   9   3   11.75    0.50 
  -5   9  -3   12.21    0.49 
   6  -9   3    5.84    0.38 
  -6  -9  -3    5.56    0.40 
  -6   9  -3    6.02    0.35 
   6   9   3    5.60    0.35 
   7  -9   3    0.36    0.17 
  -7  -9  -3    0.39    0.18 
  -7   9  -3    0.48    0.15 
   7   9   3    0.64    0.17 
  -8  -9  -3   17.41    0.72 
   8  -9   3   17.50    0.71 
  -8   9  -3   16.66    0.61 
   8   9   3   16.47    0.65 
  -9  -9  -3    7.34    0.49 
   9  -9   3    7.85    0.51 
  -9   9  -3    7.47    0.43 
   9   9   3    7.32    0.45 
 -10  -9  -3    3.32    0.42 
  10  -9   3    2.79    0.38 
  10   9   3    2.24    0.33 
  11  -9   3    1.72    0.33 
 -11  -9  -3    2.18    0.38 
  11   9   3    2.17    0.34 
 -10 -10   3    2.51    0.37 
  10  10  -3    2.58    0.35 
 -10  10   3    2.48    0.36 
  -9 -10   3    2.50    0.36 
   9  10  -3    3.28    0.37 
  -9  10   3    2.87    0.37 
  -8 -10   3    8.01    0.50 
   8  10  -3    8.83    0.50 
  -8  10   3    7.75    0.49 
  -7 -10   3    9.07    0.49 
   7  10  -3    8.71    0.48 
  -7  10   3    9.73    0.51 
  -6 -10   3    9.35    0.48 
  -6  10   3    9.07    0.48 
   6  10  -3    9.20    0.48 
  -5 -10   3    3.65    0.33 
  -5  10   3    2.81    0.30 
   5  10  -3    2.95    0.31 
   4  10  -3    8.05    0.43 
  -4  10   3    7.74    0.41 
   3  10  -3   15.11    0.57 
  -3  10   3   14.87    0.53 
  -3  10   3   14.73    0.51 
   2  10  -3    4.17    0.32 
  -2  10   3    3.77    0.27 
  -2  10   3    3.79    0.27 
   1 -10  -3   17.95    0.61 
  -1 -10   3   17.98    0.55 
  -1  10   3   18.18    0.58 
   1  10  -3   16.96    0.60 
   0 -10   3   23.29    0.66 
   0 -10  -3   22.11    0.69 
   0  10   3   22.74    0.66 
   0  10  -3   22.79    0.70 
   1 -10   3   12.62    0.49 
  -1 -10  -3   12.55    0.53 
   1  10   3   13.93    0.51 
  -1  10  -3   12.50    0.51 
   2 -10   3   11.64    0.48 
  -2 -10  -3   12.11    0.52 
   2  10   3   11.45    0.47 
  -2  10  -3   11.60    0.49 
  -3 -10  -3    1.04    0.21 
   3 -10   3    1.20    0.22 
  -3  10  -3    1.36    0.21 
   3  10   3    0.91    0.18 
   4 -10   3   45.10    1.09 
  -4 -10  -3   45.71    1.13 
   4  10   3   44.26    1.06 
  -4  10  -3   44.96    1.05 
  -5 -10  -3    9.66    0.51 
   5 -10   3    9.59    0.49 
   5  10   3    9.76    0.47 
  -5  10  -3    8.92    0.44 
   6 -10   3    2.32    0.31 
  -6 -10  -3    2.10    0.30 
   6  10   3    2.29    0.28 
  -6  10  -3    2.41    0.28 
   7 -10   3   16.41    0.67 
  -7 -10  -3   15.11    0.67 
  -7  10  -3   15.70    0.60 
   7  10   3   14.74    0.62 
   8 -10   3   13.85    0.66 
  -8 -10  -3   14.78    0.68 
  -8  10  -3   14.45    0.59 
   8  10   3   12.99    0.61 
   9 -10   3    4.17    0.44 
  -9 -10  -3    4.54    0.47 
  -9  10  -3    4.56    0.36 
   9  10   3    4.39    0.42 
  10 -10   3    3.20    0.42 
 -10 -10  -3    3.13    0.42 
  10  10   3    3.40    0.40 
  -9 -11   3    1.91    0.33 
  -9  11   3    1.24    0.28 
   9  11  -3    1.16    0.25 
  -8 -11   3   15.27    0.68 
   8  11  -3   15.41    0.68 
  -8  11   3   14.63    0.67 
  -7 -11   3    8.63    0.51 
  -7  11   3    7.44    0.48 
   7  11  -3    8.10    0.49 
  -6  11   3    2.98    0.34 
   6  11  -3    2.73    0.32 
  -5  11   3    3.40    0.34 
   5  11  -3    3.10    0.35 
  -4  11   3   12.92    0.54 
   4  11  -3   13.17    0.57 
   3  11  -3    5.70    0.38 
  -3  11   3    6.00    0.35 
  -3  11   3    5.85    0.36 
  -2  11   3    0.97    0.18 
   2  11  -3    0.97    0.21 
  -1  11   3    0.20    0.12 
   1  11  -3    0.16    0.14 
   0 -11   3    8.49    0.42 
   0  11   3    9.34    0.43 
   0  11  -3    9.14    0.45 
   1 -11   3    8.42    0.42 
  -1 -11  -3    7.94    0.44 
   1  11   3    7.55    0.41 
  -1  11  -3    7.93    0.43 
   2 -11   3    0.13    0.14 
  -2 -11  -3    0.52    0.19 
   2  11   3    0.44    0.15 
  -2  11  -3    0.29    0.13 
  -3 -11  -3    6.72    0.43 
   3 -11   3    8.09    0.44 
   3  11   3    8.30    0.44 
  -3  11  -3    8.58    0.44 
   4 -11   3    2.50    0.30 
  -4 -11  -3    1.84    0.28 
   4  11   3    2.01    0.27 
  -4  11  -3    1.77    0.25 
   5 -11   3    3.19    0.35 
  -5 -11  -3    3.21    0.37 
  -5  11  -3    2.77    0.31 
   5  11   3    2.99    0.33 
  -6 -11  -3   22.57    0.84 
   6 -11   3   23.85    0.84 
   6  11   3   23.40    0.80 
  -6  11  -3   23.01    0.75 
   7 -11   3   11.00    0.59 
  -7 -11  -3   12.37    0.63 
  -7  11  -3   11.76    0.55 
   7  11   3   13.02    0.61 
   8 -11   3    6.04    0.46 
  -8 -11  -3    6.27    0.50 
   8  11   3    6.15    0.44 
  -8  11  -3    6.04    0.41 
  -9 -11  -3   10.61    0.63 
   9 -11   3    9.84    0.61 
   9  11   3   10.04    0.58 
   8  12  -3    6.50    0.48 
  -8  12   3    7.04    0.50 
   7  12  -3    4.67    0.44 
  -7  12   3    3.99    0.41 
   6  12  -3    5.27    0.47 
  -6  12   3    4.22    0.41 
   5  12  -3    1.01    0.23 
   4  12  -3    7.99    0.47 
   3 -12  -3    8.21    0.46 
   3  12  -3    8.11    0.47 
  -2  12   3    2.27    0.27 
   2  12  -3    2.20    0.30 
  -1  12   3    1.01    0.20 
   1  12  -3    1.01    0.21 
   0  12  -3    0.74    0.20 
   0  12   3    0.99    0.20 
   1 -12   3   24.40    0.76 
  -1  12  -3   25.04    0.81 
   1  12   3   25.93    0.80 
   2 -12   3   10.93    0.52 
  -2 -12  -3   10.11    0.52 
  -2  12  -3   10.29    0.51 
   2  12   3   10.52    0.51 
  -3 -12  -3   27.06    0.88 
   3 -12   3   27.47    0.85 
   3  12   3   27.36    0.85 
  -3  12  -3   27.97    0.86 
   4 -12   3    1.60    0.27 
  -4 -12  -3    2.04    0.30 
  -4  12  -3    1.77    0.27 
   4  12   3    1.42    0.26 
  -5 -12  -3   13.77    0.65 
   5 -12   3   14.45    0.65 
   5  12   3   13.71    0.62 
  -5  12  -3   12.77    0.59 
   6 -12   3    2.77    0.36 
  -6 -12  -3    2.21    0.34 
  -6  12  -3    3.15    0.34 
   6  12   3    3.64    0.39 
  -7 -12  -3    6.82    0.50 
   7 -12   3    7.29    0.52 
  -7  12  -3    7.51    0.45 
   7  12   3    7.28    0.48 
  -8 -12  -3    6.19    0.51 
   8 -12   3    6.49    0.51 
   8  12   3    6.51    0.48 
  -8  12  -3    6.70    0.44 
   7 -13  -3    0.87    0.28 
   7  13  -3    1.69    0.33 
   6 -13  -3    2.30    0.35 
   6  13  -3    1.91    0.32 
   5 -13  -3    0.42    0.22 
   5  13  -3    0.42    0.20 
   4 -13  -3    4.47    0.43 
   4  13  -3    4.70    0.44 
   3  13  -3   15.54    0.69 
   2  13  -3    7.41    0.49 
  -2  13   3    7.92    0.45 
  -1  13   3    0.20    0.16 
   1  13  -3    0.09    0.16 
   0  13   3    1.18    0.23 
   0  13  -3    1.14    0.24 
  -1  13  -3    4.07    0.40 
   1  13   3    4.83    0.37 
   2 -13   3    6.99    0.44 
   2  13   3    6.82    0.44 
  -2  13  -3    6.35    0.44 
   3 -13   3    3.55    0.38 
   3  13   3    3.29    0.37 
  -3  13  -3    3.17    0.36 
   4 -13   3    0.63    0.24 
   4  13   3    0.49    0.19 
  -4  13  -3    0.78    0.21 
  -5 -13  -3    0.17    0.20 
   5 -13   3   -0.11    0.16 
   5  13   3    0.22    0.18 
  -5  13  -3    0.35    0.19 
   6 -13   3   13.18    0.68 
  -6 -13  -3   14.14    0.69 
   6  13   3   12.09    0.63 
  -6  13  -3   14.28    0.64 
   7 -13   3    9.23    0.60 
  -7 -13  -3    8.69    0.57 
  -7  13  -3   10.17    0.55 
   5 -14  -3    3.58    0.43 
   5  14  -3    4.28    0.46 
   4  14  -3    2.40    0.38 
   3  14  -3   13.16    0.67 
   2  14  -3    4.99    0.47 
  -1  14   3    5.48    0.40 
   1  14  -3    5.31    0.42 
   0  14  -3   16.28    0.71 
   0  14   3   15.06    0.66 
   1  14   3   10.67    0.57 
  -1  14  -3    9.99    0.56 
  -2  14  -3    6.39    0.45 
   2  14   3    6.11    0.43 
   3 -14   3    0.69    0.24 
  -3  14  -3    1.24    0.27 
   3  14   3    0.81    0.23 
   4 -14   3    1.84    0.32 
   4  14   3    1.93    0.32 
  -4  14  -3    2.19    0.33 
   5 -14   3    2.32    0.36 
   5  14   3    1.91    0.33 
  -5  14  -3    1.71    0.32 
  -1  15   3    1.98    0.32 
   1  15  -3    2.71    0.39 
   0  15  -3    0.39    0.23 
   0  15   3    0.79    0.24 
   1  15   3    0.43    0.22 
  -1  15  -3    0.36    0.21 
   2  15   3    2.33    0.35 
  -2  15  -3    2.68    0.37 
  14   0  -4   13.52    0.72 
  13   0  -4    6.79    0.52 
 -11   0   4    5.85    0.39 
 -10   0   4   25.03    0.70 
 -10   0   4   23.66    0.76 
  -9   0   4   51.42    1.14 
  -9   0   4   50.95    1.05 
  -8   0   4   92.28    1.66 
  -8   0   4   94.06    1.57 
  -7   0   4   32.25    0.71 
  -7   0   4   30.86    0.75 
  -6   0   4   24.01    0.57 
  -6   0   4   24.05    0.61 
   6   0  -4   24.63    0.45 
   5   0  -4  129.93    1.66 
  -5   0   4  122.68    1.90 
  -5   0   4  125.28    1.86 
   4   0  -4  295.77    3.99 
  -4   0   4  294.49    3.92 
   3   0  -4  114.94    1.69 
  -3   0   4  114.57    1.65 
   2   0  -4    0.18    0.05 
  -2   0   4    0.30    0.06 
  -1   0   4  207.60    2.72 
   1   0  -4  202.30    2.73 
   0   0  -4    0.17    0.04 
   0   0  -4    0.17    0.04 
  -1   0  -4  200.47    2.64 
  -1   0  -4  201.62    2.55 
   1   0   4  192.33    2.60 
   2   0   4   16.13    0.34 
  -2   0  -4   16.54    0.36 
  -2   0  -4   16.38    0.36 
  -3   0  -4   31.80    0.59 
   3   0   4   32.27    0.56 
  -3   0  -4   30.92    0.59 
  -4   0  -4   30.33    0.62 
   4   0   4   31.65    0.56 
  -4   0  -4   30.81    0.61 
  -5   0  -4  136.07    1.98 
  -5   0  -4  135.31    2.00 
   5   0   4  135.75    1.91 
  -6   0  -4   44.81    0.89 
  -6   0  -4   45.95    0.88 
   6   0   4   45.49    0.80 
   7   0   4   11.19    0.35 
  -7   0  -4   11.42    0.41 
  -7   0  -4   11.00    0.40 
  -8   0  -4   12.32    0.46 
  -8   0  -4   12.24    0.44 
  -9   0  -4    6.21    0.35 
  -9   0  -4    6.13    0.34 
 -10   0  -4   28.01    0.80 
 -11   0  -4   31.60    0.89 
  11   0   4   29.19    0.86 
  12   0   4    0.97    0.23 
  13   0   4    0.79    0.24 
  14  -1  -4    0.85    0.30 
  13  -1  -4   12.59    0.66 
 -13  -1   4   14.17    0.68 
 -12  -1   4    3.61    0.38 
  12  -1  -4    3.62    0.41 
 -11  -1   4    3.00    0.33 
  11  -1  -4    3.27    0.35 
 -11   1   4    3.09    0.31 
 -10  -1   4    4.47    0.34 
  10  -1  -4    4.89    0.37 
 -10   1   4    5.21    0.33 
  -9  -1   4   12.68    0.45 
  -9  -1   4   12.12    0.51 
   9  -1  -4   10.83    0.50 
  -9   1   4   11.51    0.46 
  -8  -1   4   15.27    0.47 
   8  -1  -4   15.80    0.56 
  -8  -1   4   15.59    0.55 
  -8   1   4   15.03    0.49 
  -7  -1   4    4.97    0.25 
   7  -1  -4    5.46    0.30 
  -7  -1   4    5.69    0.30 
  -7   1   4    5.47    0.27 
   6  -1  -4   59.12    1.13 
  -6  -1   4   58.44    1.03 
  -6  -1   4   58.27    1.11 
  -6   1   4   57.69    1.06 
   6   1  -4   60.96    0.92 
  -5  -1   4   31.29    0.70 
  -5  -1   4   32.95    0.65 
   5  -1  -4   31.15    0.70 
  -5   1   4   31.90    0.67 
   5   1  -4   34.01    0.56 
  -4  -1   4   76.83    1.26 
  -4  -1   4   79.76    1.23 
   4  -1  -4   79.86    1.29 
  -4   1   4   77.34    1.24 
   4   1  -4   77.60    1.08 
  -3  -1   4  166.83    2.32 
  -3  -1   4  165.98    2.29 
   3  -1  -4  167.02    2.36 
  -3   1   4  164.82    2.30 
   3   1  -4  167.93    2.13 
   2  -1  -4  272.74    3.61 
  -2  -1   4  269.59    3.56 
  -2   1   4  269.20    3.56 
   2   1  -4  272.41    3.58 
   1  -1  -4    4.47    0.18 
   1   1  -4    4.75    0.14 
  -1   1   4    4.82    0.18 
   1   1  -4    4.60    0.16 
   0  -1   4   12.13    0.30 
   0  -1  -4   12.74    0.25 
   0   1  -4   13.08    0.27 
   0   1  -4   13.41    0.27 
   0   1   4   13.46    0.29 
   1  -1   4  166.09    2.25 
  -1  -1  -4  165.31    2.29 
  -1  -1  -4  166.44    2.17 
   1   1   4  168.83    2.21 
  -1   1  -4  168.54    2.19 
  -2  -1  -4    1.22    0.12 
  -2  -1  -4    1.22    0.10 
   2  -1   4    1.12    0.10 
   2   1   4    1.59    0.09 
  -2   1  -4    1.05    0.10 
  -2   1  -4    1.47    0.09 
  -3  -1  -4  236.53    3.13 
  -3  -1  -4  236.02    3.23 
   3  -1   4  235.66    3.16 
  -3   1  -4  238.26    3.13 
  -3   1  -4  242.18    3.14 
   3   1   4  239.57    3.07 
  -4  -1  -4    4.09    0.20 
   4  -1   4    3.76    0.18 
  -4  -1  -4    3.71    0.20 
   4   1   4    3.78    0.15 
  -4   1  -4    3.63    0.19 
  -4   1  -4    4.43    0.18 
  -5  -1  -4   27.34    0.62 
   5  -1   4   26.50    0.56 
  -5   1  -4   26.44    0.60 
   5   1   4   27.08    0.50 
  -5   1  -4   27.25    0.56 
   6  -1   4   92.29    1.48 
  -6  -1  -4   96.82    1.56 
  -6  -1  -4   93.53    1.58 
  -6   1  -4   97.31    1.55 
   6   1   4   98.91    1.41 
  -6   1  -4   99.94    1.52 
   7  -1   4   86.16    1.39 
  -7  -1  -4   84.35    1.48 
  -7  -1  -4   85.50    1.47 
  -7   1  -4   85.25    1.42 
  -7   1  -4   85.23    1.45 
  -8  -1  -4   44.06    0.98 
   8  -1   4   43.17    0.88 
  -8   1  -4   46.25    0.94 
  -8   1  -4   44.76    0.96 
  -9  -1  -4   50.18    1.11 
  -9   1  -4   49.57    1.05 
  -9   1  -4   50.39    1.09 
   9   1   4   50.74    1.11 
 -10  -1  -4   54.47    1.22 
  10   1   4   53.90    1.19 
 -10   1  -4   55.06    1.17 
 -10   1  -4   54.21    1.19 
 -11  -1  -4    4.23    0.35 
 -11   1  -4    4.37    0.34 
  11   1   4    4.60    0.34 
 -12  -1  -4    8.97    0.51 
  12  -1   4    9.17    0.50 
  12   1   4    8.70    0.48 
  13  -1   4    8.26    0.51 
  13   1   4    8.46    0.50 
 -13  -2   4    6.08    0.47 
  13  -2  -4    5.11    0.50 
 -12  -2   4    3.60    0.39 
  12  -2  -4    3.22    0.38 
 -12   2   4    3.55    0.35 
 -11  -2   4    0.07    0.14 
  11  -2  -4    0.08    0.17 
 -11   2   4    0.12    0.13 
  10  -2  -4    1.93    0.27 
 -10  -2   4    1.79    0.26 
 -10   2   4    1.58    0.22 
   9  -2  -4   62.79    1.34 
  -9  -2   4   64.44    1.36 
  -9   2   4   65.10    1.28 
  -8  -2   4  109.50    1.72 
   8  -2  -4  104.48    1.86 
  -8  -2   4  107.25    1.89 
  -8   2   4  108.98    1.81 
  -7  -2   4   30.30    0.77 
  -7  -2   4   31.18    0.68 
   7  -2  -4   31.46    0.78 
  -7   2   4   31.47    0.74 
   7   2  -4   32.14    0.64 
  -6  -2   4   34.08    0.78 
  -6  -2   4   34.02    0.69 
   6  -2  -4   34.00    0.78 
   6   2  -4   34.80    0.64 
  -6   2   4   35.16    0.75 
   5  -2  -4   45.25    0.90 
  -5  -2   4   44.92    0.88 
  -5  -2   4   44.78    0.81 
   5   2  -4   44.31    0.74 
  -5   2   4   45.06    0.86 
  -4  -2   4  195.44    2.68 
   4  -2  -4  193.35    2.77 
  -4  -2   4  195.51    2.74 
   4   2  -4  196.51    2.55 
  -4   2   4  195.26    2.73 
   3  -2  -4   16.25    0.43 
  -3  -2   4   17.06    0.41 
  -3  -2   4   16.67    0.39 
  -3   2   4   15.98    0.40 
   3   2  -4   16.43    0.34 
  -2  -2   4   41.69    0.70 
   2  -2  -4   41.87    0.76 
  -2  -2   4   42.02    0.72 
  -2   2   4   41.41    0.72 
   2   2  -4   41.23    0.65 
  -1  -2   4  111.64    1.60 
   1  -2  -4  110.24    1.65 
   1   2  -4  112.22    1.56 
   1   2  -4  115.35    1.53 
  -1   2   4  113.85    1.59 
   0  -2   4    9.99    0.27 
   0   2   4   10.22    0.25 
   0   2   4   10.56    0.23 
   0   2  -4   10.21    0.26 
  -1  -2  -4   59.80    1.01 
   1  -2   4   58.69    0.95 
  -1   2  -4   62.77    0.94 
   1   2   4   62.00    0.88 
   1   2   4   60.78    0.90 
  -2  -2  -4   86.70    1.36 
   2  -2   4   85.33    1.30 
  -2   2  -4   86.77    1.28 
   2   2   4   89.18    1.28 
   3  -2   4  100.79    1.51 
  -3  -2  -4  103.22    1.58 
   3   2   4  103.05    1.50 
  -3   2  -4   99.76    1.49 
  -3   2  -4  102.73    1.39 
   4  -2   4   88.62    1.38 
  -4  -2  -4   89.42    1.45 
   4   2   4   88.96    1.39 
  -4   2  -4   88.72    1.38 
  -4   2  -4   90.91    1.28 
   5  -2   4   23.35    0.55 
  -5  -2  -4   23.35    0.59 
   5   2   4   24.29    0.41 
   5   2   4   23.99    0.58 
  -5   2  -4   24.57    0.49 
  -5   2  -4   23.51    0.56 
  -6  -2  -4   27.27    0.68 
   6  -2   4   26.15    0.61 
  -6   2  -4   27.04    0.57 
   6   2   4   26.50    0.65 
  -6   2  -4   26.60    0.63 
   7  -2   4   53.48    1.02 
  -7  -2  -4   54.68    1.11 
  -7   2  -4   55.15    0.99 
  -7   2  -4   53.31    1.05 
   7   2   4   54.95    1.08 
  -8  -2  -4   10.55    0.44 
   8  -2   4   11.08    0.41 
  -8   2  -4   11.13    0.39 
  -8   2  -4   11.41    0.44 
   8   2   4   11.55    0.45 
  -9  -2  -4    6.05    0.37 
   9  -2   4    5.70    0.31 
  -9   2  -4    5.35    0.32 
   9   2   4    6.20    0.36 
 -10  -2  -4   18.93    0.68 
  10   2   4   18.83    0.65 
 -10   2  -4   19.89    0.66 
 -11  -2  -4    9.60    0.51 
  11   2   4    9.65    0.49 
 -11   2  -4    9.32    0.47 
 -12  -2  -4    2.35    0.33 
 -12   2  -4    3.15    0.34 
  12   2   4    3.31    0.35 
 -13  -2  -4   13.41    0.66 
  13   2   4   14.27    0.65 
 -13  -3   4    9.18    0.58 
  13  -3  -4    8.19    0.55 
 -12  -3   4    2.99    0.38 
  12  -3  -4    3.80    0.41 
 -12   3   4    3.37    0.36 
 -11  -3   4   16.87    0.70 
  11  -3  -4   16.79    0.68 
 -11   3   4   18.59    0.67 
  10  -3  -4    9.92    0.49 
 -10  -3   4    9.80    0.50 
 -10   3   4    9.82    0.47 
  -9  -3   4   13.57    0.56 
   9  -3  -4   13.30    0.55 
  -9   3   4   13.78    0.53 
   8  -3  -4   33.60    0.86 
  -8  -3   4   33.15    0.87 
  -8   3   4   34.58    0.84 
   7  -3  -4    7.75    0.37 
  -7  -3   4    8.10    0.38 
  -7  -3   4    8.38    0.31 
   7   3  -4    8.45    0.31 
  -7   3   4    8.17    0.36 
  -6  -3   4    0.64    0.10 
   6  -3  -4    0.61    0.13 
  -6  -3   4    0.65    0.14 
  -6   3   4    0.59    0.12 
   6   3  -4    0.50    0.10 
   5  -3  -4   27.81    0.66 
  -5  -3   4   27.01    0.57 
  -5  -3   4   27.28    0.64 
   5   3  -4   26.62    0.54 
  -5   3   4   25.90    0.62 
   4  -3  -4   46.66    0.90 
  -4  -3   4   46.23    0.82 
  -4  -3   4   46.78    0.87 
   4   3  -4   47.37    0.79 
  -4   3   4   46.45    0.87 
  -3  -3   4   40.10    0.74 
   3  -3  -4   40.51    0.79 
  -3  -3   4   39.52    0.72 
   3   3  -4   40.49    0.69 
  -3   3   4   38.43    0.74 
  -2  -3   4  100.60    1.49 
  -2  -3   4  102.22    1.47 
   2  -3  -4  103.20    1.57 
   2   3  -4  101.98    1.44 
  -2   3   4  101.18    1.51 
   1  -3  -4  262.89    3.61 
  -1  -3   4  266.78    3.46 
  -1  -3   4  266.25    3.53 
  -1   3   4  266.82    3.34 
   1   3  -4  269.51    3.44 
  -1   3   4  266.83    3.50 
   0  -3   4   28.82    0.56 
   0   3   4   29.23    0.50 
   0   3   4   29.75    0.52 
   0   3  -4   28.79    0.55 
   1  -3   4   56.28    0.95 
  -1  -3  -4   57.60    1.01 
   1   3   4   59.46    0.85 
   1   3   4   57.40    0.89 
  -1   3  -4   58.81    0.93 
  -2  -3  -4   23.39    0.56 
   2  -3   4   21.98    0.50 
   2   3   4   24.85    0.49 
   3  -3   4  151.74    2.21 
  -3  -3  -4  155.81    2.29 
  -3   3  -4  155.06    2.16 
   3   3   4  155.72    2.16 
  -4  -3  -4   21.37    0.56 
   4  -3   4   21.32    0.52 
  -4   3  -4   21.07    0.50 
  -4   3  -4   21.25    0.38 
   4   3   4   21.44    0.51 
  -5  -3  -4   36.71    0.83 
   5  -3   4   37.69    0.78 
   5   3   4   37.50    0.78 
  -5   3  -4   38.76    0.77 
  -5   3  -4   38.36    0.64 
  -6  -3  -4   30.82    0.75 
   6  -3   4   28.50    0.68 
  -6   3  -4   30.25    0.69 
   6   3   4   29.40    0.70 
  -7  -3  -4    8.75    0.40 
   7  -3   4    8.31    0.35 
   7   3   4    7.79    0.35 
  -7   3  -4    8.16    0.35 
   8  -3   4   28.80    0.73 
  -8  -3  -4   28.65    0.80 
   8   3   4   30.34    0.77 
  -8   3  -4   29.66    0.75 
   9  -3   4   20.51    0.62 
  -9  -3  -4   19.27    0.67 
  -9   3  -4   18.95    0.61 
   9   3   4   20.36    0.65 
 -10  -3  -4   42.71    1.10 
  10   3   4   42.39    1.04 
 -10   3  -4   43.65    1.03 
 -11  -3  -4    0.58    0.20 
  11   3   4    0.40    0.17 
 -11   3  -4    0.41    0.17 
 -12  -3  -4   49.99    1.30 
 -12   3  -4   51.71    1.24 
  12   3   4   48.43    1.22 
 -13  -3  -4   10.67    0.60 
  13   3   4    9.25    0.53 
 -13  -4   4   10.89    0.64 
 -13   4   4   10.70    0.59 
 -12  -4   4    8.91    0.54 
  12  -4  -4    8.81    0.53 
 -12   4   4    9.49    0.53 
 -11  -4   4    1.61    0.28 
  11  -4  -4    1.55    0.27 
 -11   4   4    1.41    0.26 
 -10  -4   4   31.17    0.93 
  10  -4  -4   30.28    0.90 
 -10   4   4   31.77    0.89 
  -9  -4   4    9.06    0.46 
   9  -4  -4    9.03    0.45 
  -9   4   4    8.68    0.43 
   8  -4  -4   28.16    0.79 
  -8  -4   4   28.54    0.81 
  -8   4   4   29.51    0.79 
   8   4  -4   29.66    0.69 
  -7  -4   4   65.20    1.11 
  -7  -4   4   63.29    1.28 
   7  -4  -4   64.24    1.27 
   7   4  -4   65.42    1.14 
  -7   4   4   64.32    1.25 
  -6  -4   4  129.28    1.91 
  -6  -4   4  128.19    2.08 
   6  -4  -4  131.35    2.08 
  -6   4   4  127.96    2.05 
   6   4  -4  130.86    1.91 
   5  -4  -4   34.55    0.77 
  -5  -4   4   33.73    0.76 
  -5  -4   4   33.69    0.67 
   5   4  -4   33.56    0.68 
  -5   4   4   32.74    0.75 
  -4  -4   4   18.98    0.50 
   4  -4  -4   19.00    0.53 
  -4  -4   4   19.66    0.46 
  -4   4   4   19.42    0.51 
   4   4  -4   19.36    0.46 
  -4   4   4   19.90    0.37 
   3  -4  -4   98.65    1.58 
  -3  -4   4   96.88    1.50 
  -3  -4   4   98.33    1.48 
  -3   4   4   97.05    1.53 
  -3   4   4  101.17    1.34 
   3   4  -4   99.92    1.47 
  -2  -4   4  104.03    1.53 
  -2  -4   4  104.82    1.56 
   2  -4  -4  105.14    1.65 
   2   4  -4  104.87    1.54 
  -2   4   4  107.10    1.58 
  -2   4   4  104.54    1.43 
   1  -4  -4   69.35    1.17 
  -1  -4   4   68.32    1.09 
  -1  -4   4   68.38    1.01 
   1   4  -4   67.89    1.08 
  -1   4   4   68.44    1.00 
  -1   4   4   67.59    1.07 
   0  -4  -4   30.91    0.67 
   0  -4   4   32.22    0.63 
   0   4   4   30.69    0.56 
   0   4   4   31.11    0.56 
   0   4  -4   31.24    0.61 
  -1  -4  -4   45.14    0.88 
   1  -4   4   46.30    0.83 
   1   4   4   45.73    0.71 
  -1   4  -4   44.55    0.80 
   1   4   4   45.61    0.77 
   2  -4   4   15.16    0.42 
  -2  -4  -4   16.19    0.47 
  -2   4  -4   15.06    0.41 
   2   4   4   15.78    0.40 
  -3  -4  -4  153.80    2.30 
   3  -4   4  153.55    2.22 
  -3   4  -4  147.66    2.14 
   3   4   4  148.67    2.14 
   4  -4   4   29.70    0.68 
  -4  -4  -4   30.48    0.72 
  -4   4  -4   29.68    0.65 
   4   4   4   29.46    0.65 
  -5  -4  -4   29.33    0.74 
   5  -4   4   28.84    0.69 
   5   4   4   29.19    0.67 
  -5   4  -4   29.80    0.67 
   6  -4   4   13.60    0.46 
  -6  -4  -4   13.11    0.48 
   6   4   4   13.24    0.45 
  -6   4  -4   13.63    0.44 
  -7  -4  -4   31.78    0.83 
   7  -4   4   30.91    0.77 
   7   4   4   30.01    0.76 
  -7   4  -4   31.32    0.75 
   8  -4   4    7.23    0.37 
  -8  -4  -4    6.31    0.38 
   8   4   4    6.67    0.36 
  -8   4  -4    6.38    0.33 
  -9  -4  -4    1.53    0.24 
   9  -4   4    1.33    0.21 
  -9   4  -4    2.21    0.25 
   9   4   4    1.29    0.21 
  10  -4   4    9.81    0.47 
 -10  -4  -4    9.99    0.51 
 -10   4  -4    9.77    0.46 
  10   4   4    9.38    0.46 
 -11  -4  -4    0.39    0.18 
 -11   4  -4    0.36    0.16 
  11   4   4    0.07    0.13 
 -12  -4  -4   10.94    0.59 
 -12   4  -4   10.88    0.54 
  12   4   4   11.16    0.55 
 -13  -4  -4    7.94    0.55 
  13   4   4    8.21    0.51 
 -13  -5   4    2.64    0.40 
 -13   5   4    2.43    0.35 
 -12  -5   4    1.60    0.31 
 -12   5   4    1.79    0.31 
 -11  -5   4   15.85    0.70 
 -11   5   4   17.24    0.69 
 -10  -5   4   25.73    0.85 
  10  -5  -4   24.16    0.79 
 -10   5   4   26.24    0.83 
  -9  -5   4    8.34    0.46 
   9  -5  -4    8.49    0.45 
  -9   5   4    8.85    0.44 
   8  -5  -4    3.46    0.32 
  -8  -5   4    3.81    0.30 
  -8   5   4    3.70    0.30 
   8   5  -4    3.49    0.26 
   7  -5  -4   32.33    0.83 
  -7  -5   4   32.91    0.85 
   7   5  -4   34.43    0.77 
  -7   5   4   34.10    0.85 
   6  -5  -4   55.79    1.12 
  -6  -5   4   54.44    0.96 
  -6  -5   4   54.18    1.11 
   6   5  -4   54.86    1.03 
  -6   5   4   53.76    1.10 
   5  -5  -4   41.88    0.90 
  -5  -5   4   42.28    0.79 
  -5  -5   4   41.76    0.89 
  -5   5   4   41.26    0.89 
   5   5  -4   41.47    0.83 
  -4  -5   4    3.28    0.18 
   4  -5  -4    3.07    0.23 
  -4  -5   4    3.62    0.21 
  -4   5   4    3.23    0.21 
   4   5  -4    3.24    0.20 
  -4   5   4    3.31    0.15 
   3  -5  -4   14.96    0.46 
  -3  -5   4   14.87    0.40 
  -3  -5   4   15.15    0.42 
  -3   5   4   15.28    0.44 
   3   5  -4   15.49    0.43 
  -3   5   4   15.96    0.35 
   2  -5  -4  103.18    1.68 
  -2  -5   4  105.28    1.59 
  -2  -5   4  105.60    1.56 
  -2   5   4  106.78    1.49 
   2   5  -4  106.17    1.60 
  -2   5   4  106.33    1.61 
  -1  -5   4   77.33    1.15 
  -1  -5   4   77.54    1.24 
   1  -5  -4   77.67    1.33 
  -1   5   4   76.39    1.16 
  -1   5   4   77.36    1.21 
   1   5  -4   78.76    1.25 
   0  -5   4   63.24    1.07 
   0  -5  -4   61.90    1.14 
   0  -5   4   62.95    0.90 
   0   5   4   62.48    0.98 
   0   5   4   61.97    0.99 
   0   5  -4   62.62    1.06 
   1  -5   4    9.46    0.33 
  -1  -5  -4    9.15    0.36 
   1   5   4    9.54    0.30 
  -1   5  -4    9.74    0.33 
   1   5   4    9.61    0.25 
   2  -5   4   32.90    0.70 
  -2  -5  -4   33.61    0.77 
   2   5   4   33.04    0.53 
  -2   5  -4   32.25    0.68 
   2   5   4   32.92    0.66 
   3  -5   4   47.65    0.94 
  -3  -5  -4   49.30    1.00 
  -3   5  -4   48.37    0.91 
   3   5   4   46.84    0.89 
  -4  -5  -4   29.12    0.74 
   4  -5   4   28.90    0.69 
  -4   5  -4   28.64    0.66 
   4   5   4   29.12    0.66 
  -5  -5  -4   10.22    0.42 
   5  -5   4   10.00    0.39 
   5   5   4    9.67    0.37 
  -5   5  -4    9.58    0.36 
   6  -5   4   16.40    0.54 
  -6  -5  -4   15.56    0.55 
  -6   5  -4   16.13    0.50 
   6   5   4   15.60    0.51 
  -7  -5  -4   11.93    0.51 
   7  -5   4   12.68    0.49 
  -7   5  -4   11.61    0.44 
   7   5   4   11.91    0.46 
  -8  -5  -4   31.32    0.89 
   8  -5   4   30.34    0.82 
  -8   5  -4   31.23    0.80 
   8   5   4   30.29    0.81 
   9  -5   4   22.31    0.70 
  -9  -5  -4   21.96    0.75 
  -9   5  -4   21.47    0.67 
   9   5   4   21.61    0.70 
 -10  -5  -4    1.26    0.24 
  10  -5   4    0.76    0.20 
  10   5   4    1.37    0.23 
 -10   5  -4    1.23    0.21 
  11  -5   4   15.18    0.62 
 -11  -5  -4   14.38    0.66 
 -11   5  -4   15.35    0.61 
  11   5   4   14.54    0.62 
 -12  -5  -4   29.89    1.01 
  12   5   4   28.31    0.93 
 -13  -5  -4    6.74    0.53 
  13   5   4    7.30    0.50 
 -12  -6   4    7.01    0.53 
 -12   6   4    6.38    0.48 
 -11  -6   4    1.16    0.27 
 -11   6   4    1.03    0.25 
 -10  -6   4   10.29    0.54 
 -10   6   4   10.73    0.54 
  -9  -6   4   36.45    1.02 
   9  -6  -4   36.79    0.98 
   9   6  -4   37.38    0.90 
  -9   6   4   38.57    1.02 
   8  -6  -4    4.15    0.32 
  -8  -6   4    3.95    0.32 
  -8   6   4    4.41    0.33 
   8   6  -4    4.55    0.30 
  -7  -6   4   73.86    1.47 
   7  -6  -4   75.68    1.45 
   7   6  -4   77.73    1.39 
  -7   6   4   75.00    1.46 
   6  -6  -4   60.71    1.22 
  -6  -6   4   59.83    1.22 
   6   6  -4   61.44    1.15 
  -6   6   4   60.34    1.22 
  -5  -6   4   11.53    0.44 
   5  -6  -4   12.89    0.48 
  -5  -6   4   12.62    0.37 
   5   6  -4   12.48    0.42 
  -5   6   4   12.77    0.46 
  -4  -6   4   13.64    0.44 
  -4  -6   4   13.29    0.38 
   4  -6  -4   12.83    0.46 
   4   6  -4   12.79    0.42 
  -4   6   4   12.84    0.44 
  -4   6   4   13.34    0.35 
  -3  -6   4   44.65    0.83 
   3  -6  -4   44.62    0.94 
  -3  -6   4   43.32    0.84 
  -3   6   4   45.64    0.89 
  -3   6   4   44.09    0.77 
   3   6  -4   44.48    0.88 
  -2  -6   4   29.01    0.62 
   2  -6  -4   28.94    0.71 
  -2  -6   4   29.03    0.59 
  -2   6   4   29.36    0.65 
  -2   6   4   29.38    0.58 
   2   6  -4   29.56    0.66 
   1  -6  -4    2.02    0.21 
  -1  -6   4    2.06    0.13 
  -1  -6   4    1.83    0.15 
   1   6  -4    1.68    0.17 
  -1   6   4    1.72    0.13 
  -1   6   4    1.89    0.15 
   0  -6  -4   27.93    0.69 
   0  -6   4   27.30    0.62 
   0  -6   4   27.24    0.48 
   0   6  -4   27.50    0.63 
   0   6   4   28.51    0.56 
   0   6   4   26.90    0.58 
   1  -6   4   51.63    0.97 
  -1  -6  -4   50.77    1.03 
  -1   6  -4   50.68    0.96 
   1   6   4   52.83    0.92 
   1   6   4   51.62    0.83 
  -2  -6  -4   47.59    1.00 
   2  -6   4   47.53    0.94 
   2   6   4   47.07    0.89 
  -2   6  -4   45.92    0.91 
  -3  -6  -4    4.35    0.29 
   3  -6   4    4.93    0.26 
  -3   6  -4    4.36    0.24 
   3   6   4    4.50    0.24 
   4  -6   4   20.17    0.58 
  -4  -6  -4   19.78    0.62 
  -4   6  -4   20.08    0.55 
   4   6   4   19.22    0.54 
   5  -6   4    5.17    0.30 
  -5  -6  -4    4.85    0.32 
   5   6   4    4.94    0.28 
  -5   6  -4    4.54    0.27 
   6  -6   4   24.20    0.70 
  -6  -6  -4   25.27    0.75 
  -6   6  -4   24.07    0.65 
   6   6   4   23.57    0.67 
  -7  -6  -4   21.17    0.71 
   7  -6   4   21.89    0.68 
  -7   6  -4   20.30    0.62 
   7   6   4   21.47    0.65 
   8  -6   4    3.32    0.33 
  -8  -6  -4    3.48    0.34 
   8   6   4    2.89    0.29 
  -8   6  -4    3.26    0.27 
  -9  -6  -4    1.03    0.22 
   9  -6   4    1.07    0.21 
   9   6   4    0.77    0.18 
  -9   6  -4    0.98    0.19 
  10  -6   4    3.71    0.37 
 -10  -6  -4    3.69    0.39 
 -10   6  -4    3.28    0.33 
  10   6   4    3.61    0.36 
  11  -6   4    4.30    0.41 
 -11  -6  -4    4.71    0.46 
  11   6   4    5.18    0.40 
 -11   6  -4    5.72    0.39 
  12  -6   4    1.18    0.27 
 -12  -6  -4    1.77    0.33 
  12   6   4    1.57    0.29 
 -12  -7   4    0.76    0.27 
 -12   7   4    0.51    0.23 
 -11  -7   4   10.78    0.60 
 -11   7   4   11.26    0.59 
 -10  -7   4    0.94    0.24 
 -10   7   4    1.62    0.27 
  -9  -7   4    5.93    0.41 
  -9   7   4    4.39    0.37 
   9   7  -4    5.23    0.35 
  -8  -7   4    6.67    0.41 
  -8   7   4    6.10    0.39 
   8   7  -4    6.01    0.36 
   7  -7  -4    5.92    0.37 
  -7  -7   4    6.09    0.37 
   7   7  -4    5.57    0.34 
  -7   7   4    5.90    0.37 
  -6  -7   4   18.65    0.61 
   6  -7  -4   17.28    0.59 
  -6   7   4   18.25    0.61 
   6   7  -4   18.60    0.58 
  -5  -7   4    3.54    0.26 
   5  -7  -4    3.21    0.26 
   5   7  -4    3.76    0.26 
  -5   7   4    3.23    0.26 
  -4  -7   4   24.94    0.65 
  -4  -7   4   26.70    0.60 
   4  -7  -4   26.76    0.72 
   4   7  -4   26.10    0.67 
  -4   7   4   26.66    0.69 
  -3  -7   4   57.66    1.03 
  -3  -7   4   57.08    1.05 
   3  -7  -4   58.72    1.16 
  -3   7   4   57.57    1.09 
   3   7  -4   57.13    1.10 
  -3   7   4   56.58    0.98 
  -2  -7   4   32.33    0.67 
   2  -7  -4   32.91    0.79 
  -2  -7   4   32.49    0.70 
   2   7  -4   34.42    0.76 
  -2   7   4   32.14    0.66 
  -2   7   4   31.48    0.71 
   1  -7  -4   69.58    1.29 
  -1  -7   4   66.45    1.17 
   1   7  -4   68.21    1.23 
  -1   7   4   68.23    1.15 
  -1   7   4   65.68    1.13 
   0  -7   4  119.19    1.87 
   0  -7  -4  119.26    1.96 
   0   7  -4  120.97    1.88 
   0   7   4  119.98    1.76 
   0   7   4  118.13    1.79 
  -1  -7  -4   68.24    1.32 
   1  -7   4   67.50    1.23 
   1   7   4   70.60    1.08 
   1   7   4   68.52    1.18 
  -1   7  -4   68.48    1.23 
  -2  -7  -4    8.51    0.40 
   2  -7   4    7.88    0.34 
  -2   7  -4    7.83    0.34 
   2   7   4    7.54    0.31 
   3  -7   4    7.07    0.34 
  -3  -7  -4    6.78    0.37 
  -3   7  -4    6.72    0.31 
   3   7   4    6.82    0.31 
   4  -7   4   37.81    0.89 
  -4  -7  -4   37.52    0.93 
  -4   7  -4   37.31    0.84 
   4   7   4   37.73    0.84 
  -5  -7  -4   33.04    0.89 
   5  -7   4   34.28    0.86 
   5   7   4   31.41    0.79 
  -5   7  -4   32.65    0.79 
  -6  -7  -4   12.39    0.54 
   6  -7   4   12.67    0.51 
   6   7   4   12.07    0.48 
  -6   7  -4   13.18    0.48 
   7  -7   4    6.00    0.38 
  -7  -7  -4    6.09    0.39 
   7   7   4    5.59    0.34 
  -7   7  -4    6.21    0.34 
  -8  -7  -4   11.76    0.56 
   8  -7   4   11.48    0.53 
   8   7   4   12.12    0.52 
  -8   7  -4   12.39    0.50 
   9  -7   4   25.05    0.81 
  -9  -7  -4   21.66    0.81 
   9   7   4   21.03    0.74 
  -9   7  -4   22.72    0.72 
 -10  -7  -4   20.87    0.81 
  10  -7   4   20.82    0.77 
  10   7   4   20.90    0.75 
 -10   7  -4   20.30    0.70 
 -11  -7  -4    4.83    0.47 
  11  -7   4    4.71    0.45 
 -11   7  -4    4.48    0.35 
  11   7   4    4.45    0.42 
 -12  -7  -4   11.97    0.69 
  12  -7   4   13.45    0.66 
  12   7   4   11.83    0.62 
 -11  -8   4    0.43    0.22 
 -11   8   4    0.51    0.22 
 -10  -8   4    2.65    0.36 
 -10   8   4    2.00    0.31 
  -9  -8   4   10.31    0.55 
  -9   8   4    9.08    0.52 
   9   8  -4    9.03    0.47 
  -8  -8   4   18.85    0.70 
   8   8  -4   18.09    0.64 
  -8   8   4   18.91    0.70 
  -7  -8   4   10.91    0.50 
  -7   8   4    9.75    0.48 
   7   8  -4    9.65    0.45 
   6  -8  -4    1.63    0.24 
  -6  -8   4    1.65    0.24 
  -6   8   4    1.98    0.25 
   6   8  -4    1.90    0.23 
   5  -8  -4    2.09    0.25 
  -5  -8   4    2.20    0.25 
  -5   8   4    1.65    0.23 
   5   8  -4    2.12    0.24 
  -4  -8   4   99.37    1.67 
   4  -8  -4   97.36    1.75 
  -4   8   4   97.90    1.71 
   4   8  -4   98.69    1.71 
  -3  -8   4   12.10    0.42 
   3  -8  -4   12.01    0.47 
  -3  -8   4   11.70    0.40 
  -3   8   4   12.05    0.45 
  -3   8   4   12.27    0.39 
   3   8  -4   12.18    0.46 
  -2  -8   4   27.03    0.65 
   2  -8  -4   27.62    0.75 
  -2   8   4   28.41    0.68 
   2   8  -4   28.61    0.73 
  -2   8   4   27.70    0.64 
   1  -8  -4    1.97    0.23 
  -1  -8   4    2.26    0.19 
  -1   8   4    2.27    0.20 
   1   8  -4    1.81    0.21 
  -1   8   4    1.84    0.19 
   0  -8  -4    3.12    0.26 
   0  -8   4    3.15    0.22 
   0   8   4    3.14    0.20 
   0   8  -4    3.00    0.23 
   0   8   4    3.15    0.21 
   1  -8   4   71.99    1.32 
  -1  -8  -4   72.81    1.40 
  -1   8  -4   71.26    1.32 
   1   8   4   71.63    1.27 
  -2  -8  -4   43.85    1.02 
   2  -8   4   44.86    0.97 
  -2   8  -4   44.29    0.96 
   2   8   4   44.34    0.92 
  -3  -8  -4   33.15    0.88 
   3  -8   4   34.58    0.85 
   3   8   4   34.10    0.81 
  -3   8  -4   34.08    0.82 
   4  -8   4    0.41    0.14 
  -4  -8  -4    0.16    0.14 
   4   8   4    0.54    0.14 
  -4   8  -4    0.51    0.13 
  -5  -8  -4    9.36    0.48 
   5  -8   4   10.07    0.46 
  -5   8  -4    9.06    0.40 
   5   8   4   10.25    0.44 
   6  -8   4   15.23    0.59 
  -6  -8  -4   16.29    0.64 
  -6   8  -4   16.64    0.57 
   6   8   4   14.97    0.56 
  -7  -8  -4    0.84    0.21 
   7  -8   4    1.14    0.22 
  -7   8  -4    1.14    0.19 
   7   8   4    0.61    0.17 
  -8  -8  -4    3.94    0.40 
   8  -8   4    3.24    0.35 
  -8   8  -4    3.71    0.30 
   8   8   4    3.16    0.33 
  -9  -8  -4    0.72    0.23 
   9  -8   4    0.75    0.21 
  -9   8  -4    0.94    0.21 
   9   8   4    0.60    0.19 
  10  -8   4    0.27    0.20 
 -10  -8  -4    0.55    0.21 
  10   8   4    0.56    0.21 
 -10   8  -4    0.49    0.18 
  11  -8   4    5.34    0.44 
 -11  -8  -4    4.46    0.48 
  11   8   4    4.60    0.45 
 -11  -9   4    8.48    0.56 
 -11   9   4    7.05    0.53 
 -10  -9   4   18.48    0.79 
 -10   9   4   19.49    0.79 
  -9  -9   4    4.79    0.40 
  -9   9   4    4.38    0.42 
   9   9  -4    4.45    0.37 
  -8  -9   4    4.85    0.38 
  -8   9   4    4.69    0.38 
   8   9  -4    4.92    0.35 
  -7  -9   4   18.41    0.68 
   7   9  -4   18.28    0.66 
  -7   9   4   18.59    0.68 
  -6  -9   4   13.72    0.55 
   6   9  -4   13.71    0.55 
  -6   9   4   14.14    0.57 
  -5  -9   4   22.82    0.68 
   5   9  -4   22.54    0.70 
  -5   9   4   21.79    0.70 
   4  -9  -4   15.39    0.57 
   4   9  -4   14.15    0.54 
  -4   9   4   14.34    0.53 
   3  -9  -4   48.09    1.09 
  -3   9   4   46.73    0.94 
   3   9  -4   48.21    1.06 
  -3   9   4   47.69    1.02 
   2  -9  -4    7.74    0.41 
  -2  -9   4    7.79    0.34 
   2   9  -4    7.52    0.38 
  -2   9   4    7.60    0.35 
  -2   9   4    7.41    0.33 
  -1  -9   4   10.71    0.41 
   1  -9  -4   10.99    0.47 
  -1   9   4   10.71    0.39 
  -1   9   4   10.20    0.39 
   1   9  -4   11.81    0.47 
   0  -9   4   57.98    1.14 
   0  -9  -4   56.62    1.22 
   0   9  -4   56.80    1.18 
   0   9   4   56.23    1.10 
   1  -9   4   49.76    1.05 
  -1  -9  -4   47.29    1.10 
  -1   9  -4   50.20    1.08 
   1   9   4   49.91    1.02 
  -2  -9  -4   62.55    1.33 
   2  -9   4   62.52    1.27 
  -2   9  -4   62.99    1.26 
   2   9   4   62.92    1.23 
   3  -9   4    0.39    0.14 
  -3  -9  -4    0.40    0.16 
  -3   9  -4    0.34    0.13 
   3   9   4    0.10    0.10 
   4  -9   4    3.35    0.32 
  -4  -9  -4    3.37    0.33 
   4   9   4    3.57    0.27 
  -4   9  -4    2.97    0.28 
   5  -9   4    0.69    0.18 
  -5  -9  -4    1.42    0.26 
  -5   9  -4    1.29    0.21 
   5   9   4    1.43    0.21 
   6  -9   4   15.96    0.63 
  -6  -9  -4   16.00    0.66 
   6   9   4   16.60    0.61 
  -6   9  -4   17.14    0.60 
  -7  -9  -4   10.43    0.56 
   7  -9   4   10.97    0.54 
  -7   9  -4   11.24    0.49 
   7   9   4   10.76    0.51 
   8  -9   4    2.70    0.34 
  -8  -9  -4    3.17    0.38 
   8   9   4    2.93    0.33 
  -8   9  -4    2.46    0.30 
  -9  -9  -4    0.61    0.23 
   9  -9   4    0.57    0.21 
  -9   9  -4    0.71    0.20 
   9   9   4    0.36    0.18 
  10  -9   4   20.44    0.83 
 -10  -9  -4   21.10    0.87 
 -10   9  -4   22.03    0.77 
  10   9   4   20.60    0.80 
 -11  -9  -4    2.55    0.41 
  11  -9   4    2.55    0.39 
  11   9   4    2.62    0.37 
 -10 -10   4    3.19    0.40 
 -10  10   4    2.82    0.39 
  -9 -10   4    3.11    0.39 
   9  10  -4    2.63    0.34 
  -9  10   4    3.45    0.40 
  -8 -10   4   13.30    0.63 
  -8  10   4   13.14    0.62 
   8  10  -4   13.62    0.61 
  -7 -10   4    4.83    0.38 
   7  10  -4    5.10    0.37 
  -7  10   4    4.68    0.37 
  -6 -10   4    3.71    0.36 
  -6  10   4    4.06    0.34 
   6  10  -4    3.80    0.36 
   5  10  -4    6.74    0.40 
  -5  10   4    6.62    0.40 
  -4  10   4   18.75    0.63 
   4  10  -4   18.43    0.66 
   3  10  -4    1.90    0.25 
  -3  10   4    2.07    0.25 
  -2 -10   4   20.22    0.59 
   2 -10  -4   21.42    0.69 
  -2  10   4   21.15    0.61 
   2  10  -4   21.12    0.69 
  -2  10   4   20.83    0.61 
   1 -10  -4    5.81    0.38 
  -1 -10   4    5.16    0.31 
  -1  10   4    5.88    0.32 
   1  10  -4    5.52    0.36 
   0 -10   4   27.17    0.74 
   0 -10  -4   25.67    0.78 
   0  10  -4   26.21    0.77 
   0  10   4   25.91    0.71 
   1 -10   4   35.15    0.88 
  -1 -10  -4   34.42    0.93 
   1  10   4   34.91    0.86 
  -2 -10  -4    5.65    0.39 
   2 -10   4    5.78    0.35 
  -2  10  -4    6.00    0.37 
   2  10   4    5.21    0.33 
  -3 -10  -4    1.13    0.22 
   3 -10   4    1.33    0.23 
   3  10   4    1.21    0.20 
  -3  10  -4    1.29    0.21 
   4 -10   4    7.30    0.43 
  -4 -10  -4    7.37    0.44 
   4  10   4    8.06    0.42 
  -4  10  -4    7.51    0.41 
   5 -10   4   35.45    0.99 
  -5 -10  -4   37.74    1.05 
   5  10   4   35.49    0.95 
  -5  10  -4   36.02    0.95 
   6 -10   4   13.10    0.59 
  -6 -10  -4   12.10    0.60 
   6  10   4   12.45    0.55 
  -6  10  -4   12.18    0.53 
  -7 -10  -4    0.26    0.18 
   7 -10   4    0.18    0.18 
  -7  10  -4    0.20    0.15 
   7  10   4    0.21    0.15 
  -8 -10  -4    7.46    0.51 
   8 -10   4    8.09    0.52 
   8  10   4    7.64    0.47 
  -8  10  -4    8.19    0.46 
  -9 -10  -4    1.10    0.28 
   9 -10   4    0.85    0.25 
   9  10   4    0.80    0.24 
  -9  10  -4    0.48    0.19 
 -10 -10  -4    1.53    0.33 
  10 -10   4    2.31    0.37 
  10  10   4    1.47    0.29 
  -9 -11   4    0.47    0.23 
   9  11  -4    0.20    0.19 
  -9  11   4    0.28    0.21 
   8  11  -4    5.06    0.46 
  -8  11   4    5.12    0.47 
   7  11  -4   13.38    0.63 
  -7  11   4   13.03    0.62 
   6  11  -4    8.39    0.48 
  -6  11   4    8.24    0.48 
   5  11  -4    1.75    0.27 
  -5  11   4    1.54    0.26 
  -4  11   4    0.65    0.18 
   4  11  -4    0.44    0.16 
   3  11  -4   15.50    0.62 
  -3  11   4   15.91    0.58 
   2  11  -4   25.75    0.81 
  -2  11   4   27.48    0.75 
  -2  11   4   27.46    0.74 
  -1 -11   4    0.37    0.15 
  -1  11   4    0.23    0.13 
   1  11  -4    0.16    0.13 
   0 -11  -4    7.53    0.44 
   0 -11   4    7.89    0.40 
   0  11  -4    7.90    0.44 
   0  11   4    7.22    0.39 
  -1 -11  -4    1.31    0.25 
   1 -11   4    1.51    0.24 
  -1  11  -4    1.74    0.25 
   1  11   4    1.30    0.22 
  -2 -11  -4    5.43    0.40 
   2 -11   4    5.55    0.36 
  -2  11  -4    5.73    0.37 
   2  11   4    5.49    0.35 
   3 -11   4    1.24    0.23 
  -3 -11  -4    1.98    0.30 
  -3  11  -4    1.89    0.27 
   3  11   4    1.57    0.24 
   4 -11   4    0.70    0.19 
  -4 -11  -4    0.80    0.22 
   4  11   4    0.49    0.17 
  -4  11  -4    0.38    0.16 
  -5 -11  -4    6.28    0.44 
   5 -11   4    6.14    0.43 
   5  11   4    5.52    0.38 
  -5  11  -4    5.94    0.39 
  -6 -11  -4    6.84    0.47 
   6 -11   4    8.33    0.51 
   6  11   4    7.70    0.46 
  -6  11  -4    7.74    0.45 
   7 -11   4   10.38    0.58 
  -7 -11  -4   11.47    0.62 
  -7  11  -4    9.88    0.51 
   7  11   4   10.72    0.55 
   8 -11   4   11.64    0.64 
  -8 -11  -4   11.57    0.65 
  -8  11  -4   11.45    0.55 
   8  11   4   11.08    0.59 
   9 -11   4   12.48    0.69 
  -9 -11  -4   14.31    0.73 
  -9  11  -4   14.29    0.63 
   9  11   4   14.12    0.69 
   8  12  -4    2.09    0.34 
  -8  12   4    1.24    0.30 
  -7  12   4    8.42    0.53 
   7  12  -4    9.92    0.57 
  -6  12   4    7.72    0.48 
   6  12  -4    8.35    0.51 
  -5  12   4    0.45    0.20 
   5  12  -4    0.61    0.21 
   4  12  -4    0.94    0.23 
  -4  12   4    0.77    0.21 
   3  12  -4    8.07    0.48 
  -3  12   4    8.17    0.43 
   2  12  -4    3.24    0.35 
  -1  12   4    7.90    0.42 
   1  12  -4    6.71    0.43 
   0 -12   4    5.53    0.36 
   0  12  -4    5.27    0.38 
   0  12   4    5.45    0.36 
  -1 -12  -4    6.65    0.44 
   1 -12   4    6.99    0.42 
   1  12   4    6.63    0.40 
  -1  12  -4    6.86    0.43 
  -2 -12  -4    2.45    0.32 
   2 -12   4    2.63    0.32 
   2  12   4    2.78    0.31 
  -2  12  -4    1.82    0.27 
  -3 -12  -4   11.31    0.57 
   3 -12   4   10.54    0.54 
  -3  12  -4   12.37    0.56 
   3  12   4   12.35    0.56 
   4 -12   4   26.81    0.88 
  -4 -12  -4   26.28    0.90 
   4  12   4   25.23    0.83 
  -4  12  -4   25.57    0.84 
  -5 -12  -4    0.18    0.19 
   5 -12   4   -0.07    0.15 
   5  12   4   -0.15    0.11 
  -5  12  -4    0.11    0.16 
  -6 -12  -4    1.09    0.27 
   6 -12   4    1.16    0.28 
  -6  12  -4    1.06    0.23 
   6  12   4    1.31    0.26 
  -7 -12  -4    2.64    0.38 
   7 -12   4    2.25    0.35 
  -7  12  -4    2.00    0.30 
   7  12   4    2.32    0.33 
  -8 -12  -4    6.26    0.52 
   8 -12   4    5.13    0.51 
   8  12   4    5.97    0.48 
  -8  12  -4    5.55    0.42 
   7  13  -4    6.82    0.51 
   6  13  -4    1.50    0.29 
   5  13  -4    2.53    0.35 
   4 -13  -4    0.58    0.21 
   4  13  -4    0.38    0.19 
   3  13  -4    1.87    0.31 
   2  13  -4   11.17    0.59 
   1  13  -4   15.86    0.69 
  -1  13   4   16.35    0.64 
   0  13   4    0.05    0.13 
   0  13  -4    0.10    0.17 
   1 -13   4    0.48    0.20 
  -1  13  -4    0.21    0.17 
   1  13   4    0.08    0.15 
   2 -13   4    9.37    0.51 
   2  13   4    8.16    0.48 
  -2  13  -4    8.07    0.49 
  -3 -13  -4    6.81    0.47 
   3 -13   4    5.45    0.43 
  -3  13  -4    5.76    0.42 
   3  13   4    6.38    0.43 
  -4 -13  -4    1.79    0.32 
   4 -13   4    1.41    0.28 
   4  13   4    1.69    0.29 
  -4  13  -4    1.16    0.25 
   5 -13   4    2.89    0.38 
  -5 -13  -4    2.86    0.38 
   5  13   4    3.57    0.39 
  -5  13  -4    3.61    0.39 
  -6 -13  -4    3.48    0.43 
   6 -13   4    3.52    0.43 
   6  13   4    3.83    0.42 
  -6  13  -4    3.39    0.38 
  -7 -13  -4    3.40    0.44 
  -7  13  -4    3.23    0.38 
   5 -14  -4    1.12    0.29 
   4  14  -4    2.63    0.38 
   3  14  -4    4.84    0.50 
   2  14  -4   15.39    0.72 
   1  14  -4    1.69    0.32 
   0  14  -4    2.20    0.33 
   0  14   4    2.92    0.35 
   1  14   4    2.54    0.34 
  -1  14  -4    2.18    0.33 
   2 -14   4    5.90    0.44 
   2  14   4    5.35    0.42 
  -2  14  -4    5.32    0.44 
   3 -14   4   21.86    0.82 
   3  14   4   22.09    0.84 
  -3  14  -4   21.61    0.83 
   4 -14   4    4.10    0.44 
   4  14   4    4.29    0.45 
  -4  14  -4    3.81    0.42 
   5 -14   4    7.40    0.54 
   5  14   4    8.80    0.55 
  -5  14  -4    7.69    0.51 
   0  15   4    1.34    0.28 
  13   0  -5    0.15    0.21 
  12   0  -5    3.48    0.40 
  11   0  -5    0.12    0.17 
  10   0  -5    7.79    0.45 
 -10   0   5    8.44    0.41 
  -9   0   5    0.39    0.13 
  -8   0   5   25.68    0.66 
  -7   0   5    0.25    0.09 
   6   0  -5    4.66    0.27 
  -6   0   5    5.34    0.25 
  -5   0   5   28.44    0.63 
   5   0  -5   28.47    0.67 
  -4   0   5    2.41    0.16 
  -3   0   5   11.48    0.33 
   3   0  -5   11.09    0.34 
   2   0  -5    0.13    0.05 
  -2   0   5    0.07    0.04 
   1   0  -5    4.61    0.18 
  -1   0   5    4.40    0.19 
   0   0  -5   47.59    0.70 
   0   0  -5   46.82    0.79 
   0   0   5   47.19    0.78 
  -1   0  -5  635.56    7.94 
   1   0   5  638.24    7.88 
  -1   0  -5  593.48    7.68 
   2   0   5  198.15    2.66 
  -2   0  -5  199.05    2.71 
  -2   0  -5  200.57    2.64 
  -3   0  -5    0.70    0.10 
  -3   0  -5    0.41    0.08 
   4   0   5  406.45    5.23 
  -4   0  -5  407.15    5.32 
  -4   0  -5  401.31    5.22 
  -5   0  -5   23.33    0.55 
   5   0   5   22.69    0.49 
  -5   0  -5   22.40    0.55 
   6   0   5   53.50    0.92 
  -6   0  -5   55.43    1.02 
  -6   0  -5   52.03    1.01 
  -7   0  -5    1.26    0.17 
  -7   0  -5    1.51    0.18 
  -8   0  -5   24.11    0.66 
  -8   0  -5   24.85    0.70 
  -9   0  -5    8.53    0.40 
  -9   0  -5    8.11    0.40 
 -10   0  -5   21.02    0.68 
 -10   0  -5   21.84    0.70 
  11   0   5    4.67    0.37 
  12   0   5    0.88    0.23 
  13   0   5   12.56    0.62 
  13  -1  -5    8.42    0.56 
  13   1  -5    8.79    0.59 
  12  -1  -5   18.15    0.76 
  11  -1  -5   14.34    0.64 
 -11  -1   5   13.65    0.61 
 -11   1   5   14.87    0.58 
 -10  -1   5   17.90    0.58 
  10  -1  -5   16.55    0.66 
 -10  -1   5   16.61    0.64 
 -10   1   5   18.28    0.62 
  -9  -1   5    6.76    0.39 
   9  -1  -5    7.75    0.42 
  -9  -1   5    7.60    0.35 
  -9   1   5    8.56    0.40 
  -8  -1   5   37.27    0.92 
  -8  -1   5   38.15    0.84 
   8  -1  -5   37.91    0.94 
  -8   1   5   37.22    0.86 
   7  -1  -5   58.21    1.18 
  -7  -1   5   59.14    1.08 
  -7  -1   5   57.06    1.16 
  -7   1   5   57.30    1.10 
  -6  -1   5    7.29    0.29 
  -6  -1   5    7.11    0.33 
   6  -1  -5    6.87    0.33 
  -6   1   5    8.50    0.33 
  -5  -1   5    1.50    0.15 
  -5  -1   5    1.38    0.16 
   5  -1  -5    1.58    0.18 
  -5   1   5    1.33    0.15 
   5   1  -5    1.52    0.10 
   4  -1  -5   26.15    0.61 
  -4  -1   5   26.14    0.57 
  -4   1   5   25.77    0.57 
   4   1  -5   26.42    0.44 
  -3  -1   5  226.80    3.06 
   3  -1  -5  225.26    3.12 
   3   1  -5  220.18    3.08 
   3   1  -5  226.67    2.84 
  -2  -1   5   32.25    0.63 
   2  -1  -5   33.88    0.66 
   2   1  -5   32.69    0.62 
   2   1  -5   32.61    0.51 
   1  -1  -5   64.67    1.06 
  -1  -1   5   67.03    1.04 
   1   1  -5   64.35    1.00 
   1   1  -5   65.18    0.92 
  -1   1   5   63.80    1.02 
   0  -1  -5   32.09    0.51 
   0  -1   5   33.64    0.60 
   0  -1  -5   31.28    0.61 
   0   1  -5   31.66    0.54 
   0   1   5   32.02    0.58 
   0   1  -5   30.38    0.55 
  -1  -1  -5    0.56    0.09 
   1  -1   5    0.43    0.08 
  -1  -1  -5    0.37    0.06 
   1   1   5    0.46    0.07 
  -1   1  -5    0.52    0.07 
  -1   1  -5    0.52    0.07 
  -2  -1  -5  107.52    1.63 
  -2  -1  -5  110.87    1.56 
   2  -1   5  109.09    1.59 
  -2   1  -5  111.29    1.55 
   2   1   5  110.00    1.53 
  -2   1  -5  110.67    1.56 
   3  -1   5  190.61    2.58 
  -3  -1  -5  187.84    2.65 
  -3  -1  -5  186.77    2.56 
  -3   1  -5  192.02    2.56 
   3   1   5  189.55    2.50 
  -3   1  -5  183.97    2.55 
  -4  -1  -5    8.89    0.32 
   4  -1   5    8.76    0.29 
  -4  -1  -5    8.48    0.31 
  -4   1  -5    8.82    0.31 
   4   1   5    9.48    0.25 
  -4   1  -5    9.15    0.28 
   5  -1   5  105.61    1.61 
  -5  -1  -5  107.37    1.70 
  -5  -1  -5  105.67    1.66 
  -5   1  -5  104.79    1.65 
   5   1   5  106.85    1.52 
  -5   1  -5  109.78    1.61 
   6  -1   5   17.47    0.46 
  -6  -1  -5   17.12    0.50 
  -6  -1  -5   16.74    0.50 
  -6   1  -5   16.73    0.50 
  -6   1  -5   17.35    0.45 
  -7  -1  -5   33.76    0.80 
   7  -1   5   33.64    0.72 
  -7  -1  -5   33.56    0.80 
  -7   1  -5   35.23    0.80 
  -7   1  -5   34.61    0.75 
  -8  -1  -5   10.55    0.43 
  -8  -1  -5   10.96    0.44 
  -8   1  -5    9.78    0.42 
  -8   1  -5   11.36    0.41 
  -9  -1  -5   17.37    0.60 
   9   1   5   17.75    0.61 
  -9   1  -5   17.61    0.60 
 -10  -1  -5    3.12    0.32 
  10   1   5    2.79    0.31 
 -10   1  -5    3.14    0.32 
 -11  -1  -5    8.52    0.46 
  11   1   5    7.78    0.45 
 -11   1  -5    8.13    0.45 
 -12  -1  -5   16.66    0.68 
  12   1   5   15.39    0.65 
  13  -1   5    7.88    0.52 
  13   1   5    8.63    0.51 
  13  -2  -5    3.82    0.43 
 -13  -2   5    4.51    0.47 
 -12  -2   5    3.47    0.39 
  12  -2  -5    3.28    0.39 
 -12   2   5    4.08    0.39 
 -11  -2   5    0.22    0.16 
  11  -2  -5    0.25    0.16 
 -11   2   5    0.17    0.16 
 -10  -2   5   -0.02    0.13 
  10  -2  -5    0.16    0.15 
 -10   2   5    0.17    0.14 
  -9  -2   5    7.88    0.35 
  -9  -2   5    6.78    0.40 
   9  -2  -5    7.51    0.42 
  -9   2   5    7.15    0.38 
  -8  -2   5   23.38    0.70 
  -8  -2   5   22.30    0.59 
   8  -2  -5   21.79    0.69 
  -8   2   5   22.18    0.65 
  -7  -2   5   23.18    0.58 
  -7  -2   5   23.97    0.67 
   7  -2  -5   22.97    0.67 
  -7   2   5   22.95    0.62 
   6  -2  -5   19.97    0.59 
  -6  -2   5   20.04    0.58 
  -6  -2   5   20.49    0.52 
   6   2  -5   22.14    0.46 
  -6   2   5   20.90    0.56 
   5  -2  -5    5.01    0.27 
  -5  -2   5    4.84    0.26 
  -5  -2   5    5.04    0.23 
  -5   2   5    5.31    0.25 
   5   2  -5    4.97    0.19 
   4  -2  -5   59.39    1.09 
  -4  -2   5   62.04    1.03 
  -4  -2   5   59.81    1.05 
   4   2  -5   60.83    0.91 
  -4   2   5   60.32    1.05 
   3  -2  -5   18.02    0.48 
  -3  -2   5   18.36    0.45 
  -3  -2   5   19.07    0.45 
   3   2  -5   18.37    0.37 
  -3   2   5   18.74    0.46 
   2  -2  -5  140.65    2.07 
  -2  -2   5  144.12    2.02 
  -2   2   5  139.31    2.01 
   2   2  -5  140.81    2.00 
   2   2  -5  142.37    1.88 
   1  -2  -5   12.56    0.36 
  -1  -2   5   12.53    0.34 
   1   2  -5   12.86    0.30 
  -1   2   5   12.76    0.32 
   1   2  -5   13.02    0.31 
   0  -2  -5    3.18    0.17 
   0  -2   5    3.06    0.17 
   0   2   5    2.71    0.11 
   0   2   5    2.72    0.14 
   0   2  -5    2.81    0.12 
   0   2  -5    2.62    0.13 
  -1  -2  -5   93.91    1.48 
   1  -2   5   93.49    1.43 
  -1   2  -5   94.80    1.38 
   1   2   5   97.02    1.36 
  -1   2  -5   96.60    1.32 
   1   2   5   98.28    1.36 
  -2  -2  -5    0.49    0.10 
   2  -2   5    0.48    0.09 
  -2   2  -5    0.50    0.09 
   2   2   5    0.40    0.06 
  -3  -2  -5   74.58    1.27 
   3  -2   5   75.60    1.21 
  -3   2  -5   77.60    1.10 
   3   2   5   78.07    1.09 
  -3   2  -5   74.81    1.20 
   4  -2   5  113.37    1.74 
  -4  -2  -5  118.70    1.83 
  -4   2  -5  111.80    1.73 
   4   2   5  117.98    1.58 
  -4   2  -5  118.47    1.64 
   5  -2   5   53.02    0.97 
  -5  -2  -5   53.27    1.04 
  -5   2  -5   54.57    1.00 
  -5   2  -5   55.16    0.89 
   6  -2   5    3.76    0.23 
  -6  -2  -5    4.38    0.26 
   6   2   5    3.44    0.23 
  -6   2  -5    3.40    0.22 
  -6   2  -5    3.76    0.19 
  -7  -2  -5    3.63    0.26 
   7  -2   5    3.73    0.24 
  -7   2  -5    4.30    0.26 
   7   2   5    4.72    0.28 
   8  -2   5   41.65    0.89 
  -8  -2  -5   41.21    0.98 
   8   2   5   42.75    0.97 
  -8   2  -5   41.38    0.94 
  -9  -2  -5    0.42    0.15 
   9   2   5    0.54    0.16 
  -9   2  -5    0.33    0.14 
 -10  -2  -5   18.58    0.67 
  10   2   5   19.14    0.67 
 -10   2  -5   19.94    0.67 
 -11  -2  -5   12.97    0.59 
 -11   2  -5   11.76    0.55 
  11   2   5   12.35    0.55 
 -12  -2  -5   14.35    0.65 
  12   2   5   14.22    0.63 
 -12   2  -5   14.69    0.64 
 -13  -2  -5   11.12    0.61 
  13   2   5   10.64    0.57 
  13  -3  -5   15.51    0.75 
 -13  -3   5   15.98    0.75 
 -12  -3   5   15.63    0.72 
  12  -3  -5   16.45    0.73 
 -12   3   5   17.12    0.68 
 -11  -3   5    7.44    0.47 
  11  -3  -5    6.69    0.46 
 -11   3   5    7.61    0.45 
 -10  -3   5   24.67    0.81 
  10  -3  -5   23.21    0.79 
 -10   3   5   25.19    0.77 
  -9  -3   5    6.19    0.39 
   9  -3  -5    5.95    0.38 
  -9   3   5    6.51    0.38 
  -8  -3   5   22.90    0.60 
  -8  -3   5   22.93    0.71 
   8  -3  -5   24.33    0.72 
  -8   3   5   22.97    0.68 
   7  -3  -5   28.45    0.76 
  -7  -3   5   28.17    0.66 
  -7  -3   5   29.20    0.77 
  -7   3   5   28.25    0.73 
   6  -3  -5   50.66    1.05 
  -6  -3   5   49.79    0.93 
  -6  -3   5   49.55    1.02 
  -6   3   5   49.66    1.00 
   6   3  -5   49.46    0.87 
  -5  -3   5   10.39    0.38 
  -5  -3   5   10.16    0.34 
   5  -3  -5    9.99    0.39 
   5   3  -5   10.16    0.31 
  -5   3   5   10.39    0.37 
   4  -3  -5    9.33    0.36 
  -4  -3   5    9.06    0.33 
  -4  -3   5    9.00    0.31 
  -4   3   5    9.22    0.33 
   4   3  -5    9.24    0.27 
   3  -3  -5  204.60    2.92 
  -3  -3   5  204.53    2.84 
  -3  -3   5  205.32    2.84 
   3   3  -5  207.00    2.72 
  -3   3   5  204.48    2.86 
   2  -3  -5   20.26    0.52 
  -2  -3   5   20.04    0.47 
  -2  -3   5   21.01    0.44 
  -2   3   5   19.76    0.47 
   2   3  -5   19.93    0.43 
   1  -3  -5   84.60    1.40 
  -1  -3   5   87.70    1.34 
   1   3  -5   89.10    1.28 
   1   3  -5   86.55    1.26 
  -1   3   5   87.03    1.18 
  -1   3   5   85.65    1.30 
   0  -3   5   90.70    1.41 
   0  -3  -5   92.43    1.48 
   0   3   5   92.64    1.35 
   0   3  -5   93.80    1.29 
   0   3   5   93.73    1.29 
   0   3  -5   91.92    1.36 
   1  -3   5   47.23    0.85 
  -1  -3  -5   47.88    0.91 
   1   3   5   48.82    0.76 
  -1   3  -5   46.86    0.82 
   1   3   5   48.26    0.78 
   2  -3   5    9.71    0.32 
  -2  -3  -5   10.42    0.36 
   2   3   5    9.99    0.24 
   2   3   5    9.89    0.29 
  -2   3  -5    9.75    0.31 
  -3  -3  -5  108.28    1.75 
   3  -3   5  111.08    1.69 
  -3   3  -5  108.49    1.64 
   3   3   5  109.11    1.63 
   3   3   5  112.64    1.48 
  -4  -3  -5    7.06    0.32 
   4  -3   5    7.09    0.29 
  -4   3  -5    6.76    0.28 
  -4   3  -5    6.91    0.18 
   4   3   5    7.18    0.28 
   5  -3   5   16.71    0.48 
  -5  -3  -5   17.29    0.53 
  -5   3  -5   17.81    0.49 
   5   3   5   17.17    0.49 
   6  -3   5   40.04    0.85 
  -6  -3  -5   40.03    0.91 
   6   3   5   40.38    0.87 
  -6   3  -5   41.02    0.86 
  -7  -3  -5   18.75    0.61 
   7  -3   5   18.88    0.56 
   7   3   5   19.66    0.59 
  -7   3  -5   19.80    0.58 
   8  -3   5    7.00    0.35 
  -8  -3  -5    6.42    0.38 
   8   3   5    6.48    0.36 
  -8   3  -5    7.07    0.36 
  -9  -3  -5    4.91    0.35 
   9  -3   5    4.70    0.31 
   9   3   5    4.48    0.33 
  -9   3  -5    3.72    0.29 
 -10  -3  -5    4.61    0.36 
 -10   3  -5    4.80    0.34 
  10   3   5    4.90    0.35 
 -11  -3  -5    3.46    0.37 
  11   3   5    2.89    0.33 
 -11   3  -5    3.50    0.35 
 -12  -3  -5   13.57    0.64 
  12   3   5   12.93    0.61 
 -12   3  -5   13.81    0.61 
 -13  -3  -5    4.48    0.46 
 -13   3  -5    5.32    0.43 
  13   3   5    4.98    0.47 
  13  -4  -5    2.04    0.34 
 -13  -4   5    1.85    0.34 
 -13   4   5    1.30    0.29 
  12  -4  -5   30.07    1.00 
 -12  -4   5   28.92    1.00 
 -12   4   5   30.93    0.97 
 -11  -4   5    0.71    0.22 
  11  -4  -5    0.65    0.22 
 -11   4   5    0.69    0.21 
  10  -4  -5    1.67    0.26 
 -10  -4   5    1.37    0.26 
 -10   4   5    2.00    0.27 
   9  -4  -5    0.17    0.14 
  -9  -4   5    0.47    0.17 
  -9   4   5    0.63    0.16 
  -8  -4   5    2.39    0.27 
   8  -4  -5    2.77    0.29 
  -8   4   5    2.80    0.28 
   7  -4  -5   35.61    0.89 
  -7  -4   5   36.32    0.76 
  -7  -4   5   35.26    0.88 
  -7   4   5   36.37    0.87 
   7   4  -5   36.81    0.76 
   6  -4  -5   13.17    0.48 
  -6  -4   5   12.67    0.46 
  -6  -4   5   12.44    0.39 
   6   4  -5   12.04    0.38 
  -6   4   5   12.76    0.45 
   5  -4  -5   55.17    1.10 
  -5  -4   5   55.26    0.99 
  -5  -4   5   55.24    1.06 
   5   4  -5   56.09    0.97 
  -5   4   5   55.69    1.07 
   4  -4  -5   45.97    0.94 
  -4  -4   5   45.99    0.85 
  -4  -4   5   46.27    0.89 
  -4   4   5   46.12    0.91 
   4   4  -5   45.95    0.83 
  -3  -4   5   10.45    0.33 
   3  -4  -5   10.29    0.38 
  -3  -4   5   10.06    0.32 
   3   4  -5    9.81    0.31 
  -3   4   5    9.30    0.33 
  -3   4   5   10.37    0.23 
  -2  -4   5   75.40    1.23 
   2  -4  -5   77.20    1.33 
  -2  -4   5   77.24    1.18 
   2   4  -5   76.11    1.19 
  -2   4   5   76.55    1.23 
  -2   4   5   76.54    1.07 
  -1  -4   5   26.70    0.49 
   1  -4  -5   25.43    0.62 
  -1  -4   5   26.50    0.57 
   1   4  -5   26.12    0.55 
  -1   4   5   26.18    0.47 
  -1   4   5   26.91    0.55 
   0  -4   5   42.55    0.80 
   0  -4  -5   41.55    0.86 
   0   4   5   42.96    0.71 
   0   4   5   43.07    0.73 
   0   4  -5   43.84    0.66 
   0   4  -5   42.08    0.77 
  -1  -4  -5    6.97    0.31 
   1  -4   5    7.71    0.29 
  -1   4  -5    7.34    0.27 
   1   4   5    8.09    0.23 
   1   4   5    7.47    0.25 
  -2  -4  -5   13.17    0.44 
   2  -4   5   13.16    0.40 
   2   4   5   13.77    0.29 
   2   4   5   13.75    0.37 
  -2   4  -5   13.19    0.39 
   3  -4   5   35.90    0.75 
  -3  -4  -5   35.68    0.81 
  -3   4  -5   35.35    0.72 
   3   4   5   34.81    0.71 
   4  -4   5   50.95    0.99 
  -4  -4  -5   52.45    1.06 
  -4   4  -5   52.00    0.96 
   4   4   5   50.68    0.96 
   5  -4   5   10.60    0.39 
  -5  -4  -5   10.68    0.42 
   5   4   5   10.68    0.39 
  -5   4  -5   10.30    0.38 
   6  -4   5   20.63    0.59 
  -6  -4  -5   20.48    0.63 
  -6   4  -5   19.69    0.56 
   6   4   5   19.47    0.57 
   7  -4   5    5.96    0.32 
  -7  -4  -5    5.85    0.35 
   7   4   5    5.72    0.32 
  -7   4  -5    5.52    0.31 
  -8  -4  -5   43.55    1.07 
   8  -4   5   44.39    1.00 
   8   4   5   43.16    1.01 
  -8   4  -5   43.53    0.99 
  -9  -4  -5    2.51    0.30 
   9  -4   5    2.74    0.29 
  -9   4  -5    3.37    0.32 
   9   4   5    2.14    0.26 
 -10  -4  -5    9.52    0.50 
  10  -4   5    8.80    0.45 
 -10   4  -5    9.12    0.46 
  10   4   5    9.14    0.47 
 -11  -4  -5    5.10    0.41 
  11   4   5    4.62    0.36 
 -11   4  -5    4.97    0.37 
 -12  -4  -5   24.47    0.89 
  12   4   5   23.44    0.83 
 -12   4  -5   23.62    0.81 
 -13  -4  -5    6.01    0.49 
 -13   4  -5    6.80    0.46 
  13   4   5    5.74    0.45 
 -13   5   5    9.55    0.57 
 -12  -5   5   21.29    0.86 
 -12   5   5   21.38    0.82 
 -11  -5   5    4.94    0.41 
  11  -5  -5    4.10    0.41 
 -11   5   5    4.13    0.40 
  10  -5  -5    3.84    0.38 
 -10  -5   5    3.00    0.36 
 -10   5   5    3.34    0.35 
  -9  -5   5   16.18    0.63 
   9  -5  -5   15.15    0.61 
  -9   5   5   15.22    0.60 
  -8  -5   5    6.30    0.38 
   8  -5  -5    6.77    0.39 
  -8   5   5    6.67    0.38 
   7  -5  -5   22.16    0.69 
  -7  -5   5   21.25    0.66 
   7   5  -5   22.42    0.59 
  -7   5   5   21.45    0.66 
  -6  -5   5   33.84    0.82 
  -6  -5   5   34.52    0.73 
   6  -5  -5   35.16    0.87 
   6   5  -5   34.92    0.75 
  -6   5   5   33.15    0.82 
  -5  -5   5    5.94    0.26 
   5  -5  -5    6.25    0.34 
  -5  -5   5    6.01    0.30 
   5   5  -5    6.53    0.28 
  -5   5   5    6.37    0.32 
  -4  -5   5   10.86    0.35 
   4  -5  -5   11.48    0.43 
  -4  -5   5   10.85    0.37 
  -4   5   5   10.70    0.39 
   4   5  -5   10.85    0.36 
  -3  -5   5   62.12    1.08 
   3  -5  -5   63.60    1.20 
  -3  -5   5   63.79    1.10 
   3   5  -5   63.60    1.09 
  -3   5   5   64.16    1.14 
  -3   5   5   66.02    0.96 
   2  -5  -5   30.19    0.71 
  -2  -5   5   28.48    0.57 
  -2  -5   5   28.85    0.63 
  -2   5   5   28.54    0.63 
  -2   5   5   28.81    0.53 
   2   5  -5   28.28    0.62 
  -1  -5   5   10.57    0.27 
   1  -5  -5   11.04    0.40 
  -1  -5   5    9.96    0.33 
  -1   5   5   10.26    0.32 
  -1   5   5    9.74    0.28 
   1   5  -5   10.32    0.34 
   0  -5   5   20.05    0.51 
   0  -5  -5   20.67    0.57 
   0  -5   5   20.16    0.36 
   0   5   5   19.71    0.44 
   0   5  -5   19.60    0.50 
   0   5   5   20.03    0.45 
  -1  -5  -5  113.67    1.88 
   1  -5   5  117.27    1.80 
  -1   5  -5  117.52    1.76 
   1   5   5  118.58    1.64 
   1   5   5  116.03    1.70 
  -2  -5  -5   17.67    0.54 
   2  -5   5   17.07    0.48 
   2   5   5   17.64    0.35 
   2   5   5   16.99    0.45 
  -3  -5  -5   39.69    0.91 
   3  -5   5   39.10    0.84 
   3   5   5   41.27    0.81 
  -3   5  -5   40.81    0.82 
  -4  -5  -5    1.06    0.17 
   4  -5   5    1.31    0.17 
   4   5   5    1.11    0.15 
  -4   5  -5    1.42    0.17 
  -5  -5  -5   14.46    0.53 
   5  -5   5   14.61    0.50 
   5   5   5   15.30    0.48 
  -5   5  -5   15.20    0.48 
   6  -5   5   24.05    0.67 
  -6  -5  -5   23.02    0.71 
   6   5   5   23.85    0.65 
  -6   5  -5   24.20    0.65 
   7  -5   5   13.58    0.51 
  -7  -5  -5   12.89    0.53 
  -7   5  -5   13.62    0.49 
  -8  -5  -5    2.29    0.29 
   8  -5   5    2.19    0.26 
  -8   5  -5    2.70    0.27 
   8   5   5    2.11    0.25 
   9  -5   5   10.65    0.49 
  -9  -5  -5   10.31    0.52 
   9   5   5   10.39    0.48 
  -9   5  -5   10.58    0.47 
 -10  -5  -5    4.98    0.39 
  10  -5   5    5.30    0.38 
  10   5   5    4.51    0.36 
 -10   5  -5    5.09    0.35 
 -11  -5  -5    2.73    0.36 
  11  -5   5    2.82    0.33 
 -11   5  -5    1.91    0.28 
  11   5   5    2.18    0.30 
 -12  -5  -5    2.93    0.39 
 -12   5  -5    3.26    0.37 
  12   5   5    3.36    0.39 
 -13  -5  -5    7.71    0.56 
  13   5   5    7.32    0.52 
 -12  -6   5   17.37    0.80 
 -12   6   5   19.06    0.79 
 -11  -6   5    7.45    0.51 
 -11   6   5    7.25    0.49 
  10  -6  -5    3.00    0.36 
 -10  -6   5    3.32    0.37 
 -10   6   5    2.68    0.34 
   9  -6  -5    8.97    0.47 
  -9  -6   5    8.56    0.48 
  -9   6   5    8.53    0.47 
  -8  -6   5   -0.03    0.13 
   8  -6  -5    0.03    0.14 
  -8   6   5   -0.04    0.11 
   8   6  -5    0.16    0.12 
   7  -6  -5    2.70    0.29 
  -7  -6   5    3.00    0.30 
  -7   6   5    3.02    0.30 
   7   6  -5    2.85    0.23 
   6  -6  -5   35.91    0.90 
  -6  -6   5   35.07    0.87 
   6   6  -5   36.00    0.81 
  -6   6   5   34.88    0.87 
   5  -6  -5   23.74    0.69 
  -5  -6   5   22.75    0.56 
  -5  -6   5   23.50    0.64 
   5   6  -5   22.99    0.61 
  -5   6   5   23.52    0.65 
  -4  -6   5    4.31    0.25 
   4  -6  -5    4.24    0.29 
  -4  -6   5    4.44    0.23 
  -4   6   5    4.61    0.27 
   4   6  -5    5.04    0.26 
  -3  -6   5    5.64    0.26 
  -3  -6   5    5.77    0.26 
   3  -6  -5    6.11    0.33 
  -3   6   5    5.54    0.28 
  -3   6   5    5.70    0.22 
   3   6  -5    6.03    0.28 
  -2  -6   5    9.77    0.31 
  -2  -6   5    9.51    0.34 
   2  -6  -5    9.65    0.40 
   2   6  -5    9.78    0.36 
  -2   6   5    9.75    0.29 
  -2   6   5   10.04    0.35 
  -1  -6   5   33.38    0.60 
   1  -6  -5   33.26    0.80 
  -1  -6   5   34.03    0.72 
  -1   6   5   33.68    0.69 
  -1   6   5   33.40    0.64 
   1   6  -5   33.41    0.73 
   0  -6   5   14.61    0.44 
   0  -6  -5   13.88    0.49 
   0   6  -5   13.60    0.43 
   0   6   5   14.33    0.39 
   0   6   5   13.93    0.37 
   1  -6   5    0.23    0.09 
  -1  -6  -5    0.41    0.12 
   1   6   5    0.44    0.09 
   1   6   5    0.44    0.08 
  -1   6  -5    0.41    0.10 
  -2  -6  -5   44.86    1.01 
   2  -6   5   46.77    0.95 
  -2   6  -5   47.04    0.93 
   2   6   5   46.71    0.89 
  -3  -6  -5   14.92    0.53 
   3  -6   5   15.88    0.50 
   3   6   5   15.70    0.47 
  -3   6  -5   14.45    0.47 
  -4  -6  -5   44.53    1.02 
   4  -6   5   45.85    0.97 
   4   6   5   42.73    0.91 
  -4   6  -5   42.71    0.91 
  -5  -6  -5    2.45    0.27 
   5  -6   5    2.16    0.24 
   5   6   5    1.82    0.21 
  -5   6  -5    2.10    0.21 
   6  -6   5   19.41    0.62 
  -6  -6  -5   18.11    0.65 
  -6   6  -5   18.73    0.58 
   6   6   5   20.28    0.62 
  -7  -6  -5   10.82    0.51 
   7  -6   5   10.79    0.47 
   7   6   5   11.16    0.47 
  -7   6  -5   10.32    0.44 
  -8  -6  -5   31.18    0.92 
   8  -6   5   29.86    0.86 
  -8   6  -5   29.65    0.81 
   8   6   5   31.58    0.86 
   9  -6   5    2.22    0.29 
  -9  -6  -5    1.96    0.29 
   9   6   5    2.41    0.29 
  -9   6  -5    2.55    0.29 
  10  -6   5    2.79    0.33 
 -10  -6  -5    2.91    0.36 
 -10   6  -5    3.02    0.32 
  10   6   5    3.38    0.35 
  11  -6   5    1.95    0.30 
 -11  -6  -5    1.40    0.29 
  11   6   5    1.66    0.29 
 -11   6  -5    2.22    0.31 
 -12  -6  -5    4.67    0.48 
  12   6   5    3.93    0.42 
 -12   6  -5    3.54    0.39 
 -12  -7   5    7.00    0.54 
 -12   7   5    7.71    0.53 
 -11  -7   5    7.80    0.53 
 -11   7   5    9.04    0.55 
 -10  -7   5   10.87    0.58 
 -10   7   5    9.91    0.55 
  -9  -7   5    4.13    0.35 
  -9   7   5    3.13    0.35 
  -8  -7   5    8.47    0.47 
   8  -7  -5    7.36    0.44 
  -8   7   5    8.32    0.45 
   8   7  -5    8.25    0.41 
  -7  -7   5    8.94    0.45 
   7  -7  -5    8.40    0.45 
  -7   7   5    8.32    0.43 
   7   7  -5    7.59    0.38 
  -6  -7   5   20.96    0.65 
   6  -7  -5   21.13    0.69 
  -6   7   5   20.51    0.66 
   6   7  -5   20.45    0.61 
  -5  -7   5    3.95    0.28 
   5  -7  -5    4.10    0.31 
  -5   7   5    4.03    0.29 
   5   7  -5    3.60    0.25 
   4  -7  -5   33.05    0.85 
  -4  -7   5   33.17    0.73 
  -4  -7   5   32.35    0.75 
   4   7  -5   32.97    0.78 
  -4   7   5   33.13    0.80 
   3  -7  -5   10.22    0.44 
  -3  -7   5   11.02    0.38 
  -3  -7   5   10.24    0.36 
   3   7  -5   10.67    0.41 
  -3   7   5   10.18    0.40 
   2  -7  -5    8.09    0.39 
  -2  -7   5    8.38    0.30 
  -2  -7   5    7.94    0.32 
  -2   7   5    8.30    0.34 
   2   7  -5    7.77    0.35 
  -2   7   5    7.85    0.29 
   1  -7  -5   39.14    0.92 
  -1  -7   5   39.45    0.83 
  -1   7   5   40.50    0.80 
  -1   7   5   38.83    0.76 
   1   7  -5   39.03    0.85 
   0  -7  -5   20.49    0.63 
   0  -7   5   20.26    0.56 
   0   7   5   20.36    0.49 
   0   7   5   20.59    0.52 
   0   7  -5   19.32    0.56 
   1  -7   5    5.88    0.30 
  -1  -7  -5    6.76    0.36 
  -1   7  -5    6.31    0.31 
   1   7   5    6.08    0.28 
  -2  -7  -5   22.10    0.67 
   2  -7   5   22.90    0.63 
  -2   7  -5   22.01    0.61 
   2   7   5   22.71    0.58 
  -3  -7  -5   29.96    0.82 
   3  -7   5   30.37    0.77 
   3   7   5   31.64    0.73 
  -3   7  -5   30.48    0.75 
  -4  -7  -5    6.39    0.38 
   4  -7   5    6.24    0.35 
   4   7   5    6.37    0.33 
  -4   7  -5    6.52    0.34 
   5  -7   5   26.16    0.75 
  -5  -7  -5   27.49    0.81 
   5   7   5   27.68    0.73 
  -5   7  -5   27.65    0.72 
   6  -7   5    2.22    0.27 
  -6  -7  -5    1.99    0.28 
  -6   7  -5    2.23    0.24 
   6   7   5    1.75    0.23 
   7  -7   5   12.21    0.53 
  -7  -7  -5   13.21    0.59 
   7   7   5   12.81    0.52 
  -7   7  -5   12.87    0.50 
  -8  -7  -5    2.81    0.34 
   8  -7   5    2.52    0.30 
   8   7   5    2.93    0.31 
  -8   7  -5    2.38    0.28 
   9  -7   5   40.92    1.09 
  -9  -7  -5   42.03    1.17 
   9   7   5   42.18    1.09 
  -9   7  -5   40.89    1.04 
 -10  -7  -5   10.36    0.58 
  10  -7   5   10.38    0.55 
  10   7   5    9.39    0.51 
 -10   7  -5   11.03    0.53 
  11  -7   5    3.91    0.42 
 -11  -7  -5    4.06    0.44 
  11   7   5    3.77    0.40 
 -11   7  -5    3.87    0.38 
  12  -7   5    0.77    0.27 
 -12  -7  -5    0.89    0.28 
  12   7   5    0.47    0.23 
 -11  -8   5   -0.04    0.19 
 -11   8   5    0.14    0.20 
 -10  -8   5    1.22    0.27 
 -10   8   5    1.02    0.26 
  -9  -8   5    4.21    0.41 
  -9   8   5    3.23    0.36 
  -8  -8   5   10.34    0.53 
  -8   8   5    9.09    0.49 
   8   8  -5    8.86    0.44 
  -7  -8   5    0.02    0.13 
   7  -8  -5    0.13    0.15 
  -7   8   5   -0.02    0.12 
   7   8  -5    0.02    0.12 
  -6  -8   5    6.94    0.39 
   6  -8  -5    7.37    0.43 
   6   8  -5    7.87    0.40 
  -6   8   5    8.33    0.44 
  -5  -8   5   32.79    0.82 
   5  -8  -5   33.01    0.89 
   5   8  -5   31.59    0.82 
  -5   8   5   31.95    0.85 
   4  -8  -5   13.30    0.53 
  -4  -8   5   12.52    0.45 
  -4  -8   5   11.81    0.41 
  -4   8   5   12.06    0.48 
   4   8  -5   12.10    0.47 
   3  -8  -5   17.04    0.59 
  -3  -8   5   16.00    0.49 
   3   8  -5   17.40    0.56 
  -3   8   5   17.18    0.54 
   2  -8  -5   40.92    0.98 
  -2  -8   5   41.16    0.87 
   2   8  -5   41.40    0.93 
  -2   8   5   39.82    0.81 
  -2   8   5   43.69    0.90 
   1  -8  -5   14.93    0.55 
  -1  -8   5   15.48    0.49 
  -1   8   5   16.14    0.46 
  -1   8   5   16.27    0.47 
   1   8  -5   15.78    0.52 
   0  -8  -5    2.27    0.26 
   0  -8   5    2.24    0.22 
   0   8   5    1.73    0.18 
   0   8  -5    2.34    0.24 
   0   8   5    2.17    0.20 
   1  -8   5   13.79    0.48 
  -1  -8  -5   14.60    0.55 
   1   8   5   14.36    0.46 
  -1   8  -5   13.29    0.48 
   2  -8   5    0.15    0.12 
  -2  -8  -5    0.24    0.14 
   2   8   5    0.34    0.10 
  -2   8  -5    0.18    0.12 
  -3  -8  -5    9.76    0.48 
   3  -8   5   11.04    0.46 
  -3   8  -5   11.15    0.45 
   3   8   5   10.90    0.43 
  -4  -8  -5   12.12    0.54 
   4  -8   5   13.38    0.51 
   4   8   5   12.04    0.47 
  -4   8  -5   10.80    0.46 
   5  -8   5   15.81    0.59 
  -5  -8  -5   15.96    0.63 
   5   8   5   16.21    0.57 
  -5   8  -5   16.08    0.56 
   6  -8   5   14.92    0.60 
  -6  -8  -5   15.89    0.64 
  -6   8  -5   15.83    0.56 
   6   8   5   14.75    0.56 
   7  -8   5    5.32    0.39 
  -7  -8  -5    5.04    0.39 
   7   8   5    5.44    0.37 
  -7   8  -5    5.60    0.35 
   8  -8   5   21.58    0.76 
  -8  -8  -5   22.09    0.81 
   8   8   5   20.39    0.72 
  -8   8  -5   21.03    0.71 
  -9  -8  -5    5.22    0.44 
   9  -8   5    5.30    0.41 
  -9   8  -5    5.70    0.39 
   9   8   5    5.27    0.40 
  10  -8   5    4.26    0.44 
 -10  -8  -5    4.70    0.47 
  10   8   5    4.85    0.45 
 -10   8  -5    5.48    0.40 
 -11  -8  -5    2.39    0.37 
  11  -8   5    2.38    0.36 
  11   8   5    3.05    0.38 
 -11   8  -5    2.31    0.32 
 -11  -9   5   10.47    0.64 
 -10  -9   5    0.90    0.27 
 -10   9   5    0.84    0.26 
  -9  -9   5    0.35    0.20 
  -9   9   5    0.38    0.21 
  -8  -9   5    0.59    0.20 
   8   9  -5    0.64    0.20 
  -8   9   5    0.72    0.22 
  -7  -9   5    5.21    0.38 
   7   9  -5    4.31    0.34 
  -7   9   5    4.57    0.36 
  -6  -9   5    3.99    0.32 
   6   9  -5    4.33    0.32 
  -6   9   5    4.03    0.34 
   5  -9  -5    5.05    0.37 
  -5   9   5    5.29    0.35 
   5   9  -5    5.40    0.35 
   4  -9  -5   11.06    0.51 
   4   9  -5    9.65    0.45 
  -4   9   5   10.35    0.45 
   3  -9  -5    6.63    0.40 
  -3  -9   5    6.47    0.32 
  -3   9   5    6.30    0.35 
   3   9  -5    5.99    0.35 
  -2  -9   5    4.57    0.28 
   2  -9  -5    4.13    0.32 
  -2   9   5    3.70    0.24 
  -2   9   5    4.42    0.28 
   2   9  -5    4.41    0.30 
  -1  -9   5   33.97    0.82 
   1  -9  -5   35.30    0.92 
  -1   9   5   35.86    0.79 
   1   9  -5   34.58    0.87 
  -1   9   5   34.75    0.79 
   0  -9   5   38.75    0.90 
   0  -9  -5   38.08    0.98 
   0   9   5   39.05    0.86 
   0   9  -5   39.18    0.94 
  -1  -9  -5   27.94    0.81 
   1  -9   5   26.95    0.74 
  -1   9  -5   26.06    0.74 
   1   9   5   26.69    0.70 
   2  -9   5   17.70    0.59 
  -2  -9  -5   17.39    0.64 
  -2   9  -5   17.30    0.59 
   2   9   5   17.78    0.57 
   3  -9   5   10.42    0.47 
  -3  -9  -5   10.57    0.51 
   3   9   5   11.00    0.46 
  -3   9  -5   11.96    0.48 
  -4  -9  -5    7.97    0.46 
   4  -9   5    8.43    0.43 
  -4   9  -5    8.25    0.42 
   4   9   5    7.69    0.40 
   5  -9   5    3.35    0.33 
  -5  -9  -5    3.48    0.37 
  -5   9  -5    2.94    0.29 
   5   9   5    3.33    0.27 
   6  -9   5    1.18    0.23 
  -6  -9  -5    1.35    0.26 
   6   9   5    1.10    0.22 
  -6   9  -5    1.45    0.23 
  -7  -9  -5    1.47    0.27 
   7  -9   5    1.15    0.25 
  -7   9  -5    1.64    0.24 
   7   9   5    1.29    0.23 
   8  -9   5    6.77    0.46 
  -8  -9  -5    7.67    0.51 
  -8   9  -5    6.38    0.41 
   8   9   5    6.14    0.41 
   9  -9   5   19.38    0.78 
  -9  -9  -5   20.54    0.84 
  -9   9  -5   20.27    0.73 
   9   9   5   20.22    0.77 
  10  -9   5    8.56    0.56 
 -10  -9  -5    9.59    0.59 
  10   9   5    7.67    0.50 
 -10   9  -5    8.65    0.50 
 -10 -10   5    2.07    0.36 
 -10  10   5    2.05    0.36 
  -9 -10   5    2.79    0.36 
   9  10  -5    2.67    0.34 
  -9  10   5    3.40    0.39 
  -8 -10   5    7.51    0.48 
   8  10  -5    7.35    0.47 
  -8  10   5    8.16    0.50 
   7  10  -5    7.65    0.46 
  -7  10   5    8.40    0.49 
   6  10  -5    3.11    0.33 
  -6  10   5    3.27    0.35 
  -5  10   5   11.49    0.52 
   5  10  -5   11.31    0.52 
   4  10  -5   19.63    0.69 
  -4  10   5   20.57    0.67 
   3 -10  -5   23.34    0.77 
   3  10  -5   21.42    0.71 
  -3  10   5   24.04    0.70 
   2 -10  -5    7.03    0.43 
  -2 -10   5    7.91    0.38 
  -2  10   5    7.76    0.37 
   2  10  -5    6.79    0.40 
  -1 -10   5    8.82    0.41 
   1 -10  -5    9.00    0.48 
  -1  10   5    8.61    0.39 
   1  10  -5    7.67    0.41 
   0 -10   5    3.90    0.30 
   0 -10  -5    3.76    0.37 
   0  10   5    3.58    0.27 
   0  10  -5    3.35    0.32 
   1 -10   5    3.38    0.31 
  -1 -10  -5    3.29    0.34 
  -1  10  -5    3.54    0.28 
   1  10   5    3.75    0.28 
   2 -10   5    5.99    0.37 
  -2 -10  -5    5.35    0.39 
   2  10   5    4.93    0.32 
  -2  10  -5    5.19    0.34 
  -3 -10  -5    0.73    0.20 
   3 -10   5    0.73    0.19 
   3  10   5    0.87    0.18 
  -3  10  -5    0.71    0.17 
   4 -10   5   11.10    0.52 
  -4 -10  -5   11.33    0.55 
  -4  10  -5   10.03    0.48 
   4  10   5   10.78    0.49 
   5 -10   5   13.17    0.58 
  -5 -10  -5   13.54    0.62 
  -5  10  -5   13.05    0.55 
   5  10   5   13.33    0.56 
   6 -10   5    3.11    0.36 
  -6 -10  -5    3.80    0.39 
   6  10   5    3.98    0.38 
  -6  10  -5    3.81    0.31 
   7 -10   5    2.50    0.34 
  -7 -10  -5    2.54    0.36 
  -7  10  -5    2.65    0.31 
   7  10   5    2.16    0.29 
  -8 -10  -5    4.48    0.47 
   8 -10   5    4.28    0.44 
   8  10   5    4.85    0.40 
  -8  10  -5    4.20    0.39 
   9 -10   5    3.34    0.41 
  -9 -10  -5    4.31    0.48 
   9  10   5    4.09    0.42 
  -9  10  -5    3.87    0.38 
  10 -10   5   14.63    0.72 
  10  10   5   14.28    0.69 
 -10  10  -5   14.72    0.65 
   9  11  -5   11.35    0.61 
  -9  11   5   10.83    0.63 
   8  11  -5    5.39    0.44 
  -8  11   5    4.48    0.46 
  -7  11   5    4.11    0.42 
   7  11  -5    4.42    0.43 
   6  11  -5    7.52    0.47 
  -6  11   5    8.56    0.49 
   5  11  -5    5.67    0.40 
  -5  11   5    5.56    0.39 
  -4  11   5    8.62    0.46 
   4  11  -5    8.02    0.47 
   3  11  -5    7.89    0.46 
  -3  11   5    7.91    0.41 
   2  11  -5    0.18    0.15 
   1 -11  -5    8.71    0.49 
  -1 -11   5    8.90    0.43 
   1  11  -5    8.29    0.45 
  -1  11   5    8.85    0.41 
   0 -11  -5    3.83    0.38 
   0 -11   5    3.65    0.33 
   0  11   5    4.28    0.30 
   0  11  -5    3.62    0.35 
  -1 -11  -5   16.27    0.66 
   1 -11   5   14.83    0.59 
   1  11   5   16.23    0.58 
  -1  11  -5   16.72    0.64 
   2 -11   5   10.94    0.51 
  -2 -11  -5   11.57    0.57 
  -2  11  -5   11.06    0.52 
   2  11   5   11.04    0.49 
  -3 -11  -5    2.12    0.31 
   3 -11   5    1.58    0.25 
  -3  11  -5    1.54    0.24 
   3  11   5    1.97    0.26 
  -4 -11  -5    7.98    0.50 
   4 -11   5    8.32    0.48 
  -4  11  -5    8.30    0.46 
   4  11   5    8.69    0.46 
   5 -11   5   11.49    0.58 
  -5 -11  -5   14.00    0.65 
  -5  11  -5   11.93    0.56 
   5  11   5   13.31    0.58 
   6 -11   5    0.80    0.24 
  -6 -11  -5    0.39    0.22 
   6  11   5    0.20    0.16 
  -6  11  -5    0.81    0.20 
  -7 -11  -5   10.21    0.60 
   7 -11   5    8.70    0.54 
  -7  11  -5    8.59    0.48 
   7  11   5    8.76    0.51 
   8 -11   5   10.30    0.61 
  -8 -11  -5   11.90    0.67 
  -8  11  -5   10.80    0.55 
   8  11   5   10.99    0.58 
   9 -11   5    2.83    0.41 
  -9 -11  -5    2.47    0.40 
  -9  11  -5    2.81    0.35 
   9  11   5    3.12    0.41 
   8  12  -5   10.68    0.61 
  -8  12   5   10.07    0.60 
  -7  12   5   13.58    0.66 
   7  12  -5   15.47    0.70 
   6  12  -5    5.70    0.43 
  -6  12   5    5.72    0.43 
  -5  12   5    5.64    0.41 
   5  12  -5    6.20    0.45 
  -4  12   5    8.53    0.47 
   4  12  -5    9.66    0.54 
   3  12  -5    2.93    0.34 
   2  12  -5    5.26    0.40 
   1  12  -5    0.11    0.15 
  -1  12   5    0.09    0.11 
   0 -12  -5    2.64    0.34 
   0 -12   5    2.52    0.29 
   0  12  -5    2.13    0.29 
   0  12   5    2.25    0.28 
   1 -12   5    3.16    0.34 
  -1 -12  -5    3.71    0.40 
  -1  12  -5    2.99    0.33 
   1  12   5    3.52    0.34 
   2 -12   5    7.87    0.46 
  -2 -12  -5    8.11    0.50 
   2  12   5    8.84    0.46 
  -2  12  -5    8.57    0.49 
  -3 -12  -5    5.28    0.43 
   3 -12   5    5.05    0.40 
   3  12   5    5.72    0.39 
  -3  12  -5    5.16    0.38 
  -4 -12  -5    1.10    0.27 
   4 -12   5    0.80    0.24 
   4  12   5    1.01    0.23 
  -4  12  -5    0.77    0.22 
   5 -12   5    7.40    0.49 
  -5 -12  -5    6.65    0.50 
   5  12   5    6.16    0.43 
  -5  12  -5    6.27    0.44 
   6 -12   5   18.24    0.76 
  -6 -12  -5   17.07    0.78 
  -6  12  -5   17.24    0.70 
   6  12   5   18.33    0.74 
  -7 -12  -5    0.71    0.26 
   7 -12   5    0.69    0.24 
   7  12   5    0.17    0.18 
  -7  12  -5    0.48    0.20 
  -8 -12  -5    6.46    0.59 
  -8  12  -5    6.56    0.45 
  -6  13   5    1.73    0.31 
   6  13  -5    1.13    0.28 
   5  13  -5    4.79    0.47 
  -5  13   5    5.22    0.42 
   4  13  -5   15.43    0.71 
   3  13  -5    7.85    0.51 
   2  13  -5    5.86    0.45 
   1  13  -5    0.85    0.23 
   0  13   5   14.78    0.62 
   0  13  -5   15.12    0.67 
   1 -13   5    2.92    0.34 
  -1  13  -5    2.60    0.34 
   1  13   5    3.31    0.36 
  -2 -13  -5    9.89    0.57 
   2 -13   5    9.82    0.53 
  -2  13  -5   10.28    0.56 
   2  13   5    9.44    0.51 
  -3 -13  -5    3.86    0.42 
   3 -13   5    3.72    0.40 
  -3  13  -5    4.01    0.40 
   3  13   5    3.67    0.38 
  -4 -13  -5    4.62    0.47 
   4 -13   5    3.97    0.42 
   4  13   5    5.19    0.42 
  -4  13  -5    4.41    0.43 
   5 -13   5    3.00    0.39 
  -5 -13  -5    2.48    0.37 
  -5  13  -5    3.15    0.38 
   5  13   5    3.60    0.39 
   6 -13   5    1.77    0.34 
  -6 -13  -5    1.55    0.34 
  -6  13  -5    1.85    0.31 
   6  13   5    1.57    0.30 
   4  14  -5    7.28    0.54 
   3  14  -5    3.87    0.44 
   2  14  -5    0.27    0.21 
   1  14  -5    4.81    0.47 
   0  14  -5    1.12    0.26 
   1  14   5    5.94    0.42 
  -1  14  -5    5.03    0.47 
   2 -14   5    8.47    0.51 
  -2  14  -5    8.57    0.55 
   2  14   5    9.27    0.53 
   3 -14   5    7.69    0.52 
  -3  14  -5    8.97    0.55 
   3  14   5    8.03    0.52 
   4 -14   5    0.92    0.27 
  -4  14  -5    1.19    0.27 
   4  14   5    1.20    0.27 
  13   0  -6   13.60    0.72 
  12   0  -6    0.20    0.20 
 -11   0   6   12.62    0.54 
  11   0  -6   13.90    0.65 
 -10   0   6    0.24    0.13 
  10   0  -6    0.08    0.15 
  -9   0   6    0.01    0.10 
   9   0  -6    0.03    0.12 
  -8   0   6    0.00    0.10 
   8   0  -6    0.13    0.12 
  -7   0   6   59.26    1.14 
   7   0  -6   60.02    1.23 
   6   0  -6   20.26    0.59 
  -6   0   6   19.80    0.54 
  -5   0   6   66.74    1.17 
   5   0  -6   67.00    1.23 
  -4   0   6    7.46    0.29 
   4   0  -6    8.12    0.32 
  -3   0   6  220.10    3.02 
   3   0  -6  217.01    3.06 
   2   0  -6   37.07    0.72 
  -2   0   6   36.42    0.71 
   1   0  -6    3.78    0.18 
  -1   0   6    3.14    0.18 
   1   0  -6    3.42    0.12 
   0   0  -6  162.51    2.30 
   0   0  -6  166.49    2.15 
   0   0   6  163.83    2.29 
  -1   0  -6    1.04    0.11 
  -1   0  -6    0.75    0.09 
   1   0   6    0.50    0.08 
  -2   0  -6   10.83    0.32 
   2   0   6   10.10    0.29 
  -2   0  -6    9.73    0.29 
  -3   0  -6    9.57    0.31 
  -3   0  -6    9.75    0.31 
   3   0   6    9.44    0.29 
  -4   0  -6   45.76    0.86 
   4   0   6   44.30    0.79 
  -4   0  -6   45.07    0.84 
  -5   0  -6    8.06    0.31 
   5   0   6    7.97    0.28 
  -5   0  -6    7.99    0.32 
  -6   0  -6   87.82    1.46 
  -6   0  -6   83.85    1.46 
   6   0   6   88.23    1.37 
  -7   0  -6    0.21    0.09 
  -7   0  -6    0.03    0.09 
  -8   0  -6    6.17    0.32 
  -8   0  -6    6.65    0.36 
  -9   0  -6    0.15    0.11 
  -9   0  -6   -0.06    0.09 
 -10   0  -6    5.85    0.39 
  12   0   6    2.49    0.34 
  13   0   6    9.03    0.55 
  13  -1  -6    0.66    0.26 
  13   1  -6    1.50    0.32 
  12  -1  -6   22.21    0.87 
  12   1  -6   22.89    0.89 
  11  -1  -6    4.95    0.46 
 -11   1   6    4.07    0.34 
  11   1  -6    4.26    0.42 
 -10  -1   6    0.52    0.15 
  10  -1  -6    0.29    0.16 
 -10   1   6    0.62    0.17 
   9  -1  -6    4.47    0.34 
  -9  -1   6    4.54    0.29 
  -9   1   6    4.43    0.30 
   8  -1  -6   40.09    0.99 
  -8  -1   6   38.54    0.86 
  -8   1   6   36.85    0.88 
   7  -1  -6   18.58    0.61 
  -7  -1   6   19.13    0.54 
  -7   1   6   18.54    0.56 
  -6  -1   6   22.49    0.58 
   6  -1  -6   22.55    0.64 
  -6   1   6   22.13    0.59 
   6   1  -6   23.59    0.65 
  -5  -1   6   87.32    1.43 
   5  -1  -6   88.10    1.52 
  -5   1   6   87.94    1.45 
   5   1  -6   88.12    1.50 
   4  -1  -6    7.93    0.32 
  -4  -1   6    7.56    0.29 
   4   1  -6    7.59    0.19 
   4   1  -6    6.97    0.29 
  -4   1   6    7.35    0.29 
   3  -1  -6  158.13    2.34 
  -3  -1   6  159.39    2.29 
  -3   1   6  157.04    2.29 
   3   1  -6  165.43    2.06 
   3   1  -6  158.32    2.31 
  -2  -1   6   16.93    0.43 
   2  -1  -6   16.19    0.44 
   2   1  -6   15.14    0.40 
  -2   1   6   15.58    0.41 
   2   1  -6   16.42    0.32 
   1  -1  -6   36.16    0.73 
   1  -1  -6   38.34    0.56 
  -1  -1   6   35.98    0.71 
   1   1  -6   37.27    0.69 
  -1   1   6   38.21    0.70 
   1   1  -6   38.35    0.61 
   0  -1   6    8.72    0.29 
   0  -1  -6    8.56    0.22 
   0  -1  -6    8.55    0.30 
   0   1   6    8.75    0.27 
   0   1  -6    8.82    0.24 
   0   1  -6    8.49    0.26 
  -1  -1  -6   27.40    0.51 
   1  -1   6   26.89    0.56 
  -1  -1  -6   27.84    0.59 
   1   1   6   26.20    0.53 
  -1   1  -6   26.33    0.52 
  -1   1  -6   26.93    0.52 
   2  -1   6  168.50    2.37 
  -2  -1  -6  171.68    2.32 
  -2  -1  -6  172.11    2.44 
   2   1   6  169.94    2.33 
  -2   1  -6  169.85    2.33 
  -2   1  -6  172.02    2.35 
   3  -1   6   13.30    0.37 
  -3  -1  -6   14.24    0.41 
  -3  -1  -6   13.49    0.38 
  -3   1  -6   13.63    0.35 
  -3   1  -6   12.79    0.37 
   3   1   6   13.26    0.33 
  -4  -1  -6    4.14    0.23 
  -4  -1  -6    3.60    0.21 
   4  -1   6    3.43    0.19 
  -4   1  -6    3.92    0.19 
  -4   1  -6    3.04    0.19 
   4   1   6    3.65    0.17 
  -5  -1  -6   36.73    0.78 
  -5  -1  -6   36.04    0.78 
   5  -1   6   37.07    0.73 
   5   1   6   36.57    0.66 
  -5   1  -6   35.57    0.77 
  -5   1  -6   36.44    0.72 
  -6  -1  -6    0.75    0.14 
  -6  -1  -6    0.91    0.15 
   6  -1   6    0.91    0.14 
  -6   1  -6    0.93    0.13 
  -6   1  -6    0.94    0.15 
  -7  -1  -6   25.55    0.68 
  -7  -1  -6   26.26    0.70 
   7  -1   6   25.83    0.62 
  -7   1  -6   25.84    0.63 
  -7   1  -6   26.30    0.70 
  -8  -1  -6    2.89    0.23 
  -8  -1  -6    3.20    0.30 
  -8   1  -6    3.20    0.26 
  -9  -1  -6    8.40    0.42 
  -9   1  -6    8.33    0.42 
 -10  -1  -6    8.33    0.45 
  10   1   6    8.42    0.45 
 -10   1  -6    8.10    0.44 
 -11  -1  -6    6.47    0.42 
  11   1   6    6.01    0.42 
 -11   1  -6    6.04    0.41 
  12   1   6    6.90    0.45 
  13  -1   6    5.03    0.47 
  13   1   6    5.51    0.44 
  13  -2  -6    0.64    0.28 
  13   2  -6    0.42    0.25 
  12  -2  -6    5.12    0.48 
 -12   2   6    5.30    0.40 
 -11  -2   6   15.72    0.68 
  11  -2  -6   15.63    0.68 
 -11   2   6   16.15    0.63 
  10  -2  -6    5.48    0.39 
 -10  -2   6    5.16    0.38 
 -10   2   6    4.82    0.34 
  -9  -2   6    0.75    0.16 
   9  -2  -6    0.69    0.18 
  -9  -2   6    0.44    0.16 
  -9   2   6    0.68    0.17 
  -8  -2   6    0.06    0.11 
   8  -2  -6   -0.06    0.10 
  -8  -2   6    0.07    0.08 
  -8   2   6    0.01    0.09 
  -7  -2   6   45.06    1.00 
   7  -2  -6   44.17    1.02 
  -7  -2   6   46.77    0.93 
  -7   2   6   41.84    0.95 
  -6  -2   6    4.52    0.27 
   6  -2  -6    4.53    0.28 
  -6  -2   6    3.75    0.23 
  -6   2   6    4.37    0.26 
  -5  -2   6   20.98    0.57 
   5  -2  -6   21.90    0.61 
  -5  -2   6   22.60    0.56 
  -5   2   6   22.12    0.57 
   5   2  -6   22.77    0.45 
   4  -2  -6   20.02    0.55 
  -4  -2   6   20.23    0.51 
  -4   2   6   19.71    0.51 
   4   2  -6   19.83    0.40 
   3  -2  -6  133.23    2.03 
  -3  -2   6  131.95    1.97 
  -3   2   6  131.02    1.97 
   3   2  -6  136.36    1.80 
   3   2  -6  132.12    1.97 
  -2  -2   6   39.48    0.77 
   2  -2  -6   40.16    0.81 
  -2   2   6   39.46    0.75 
   2   2  -6   40.60    0.74 
   2   2  -6   40.24    0.66 
   1  -2  -6   19.29    0.50 
  -1  -2   6   19.48    0.47 
  -1   2   6   19.83    0.34 
   1   2  -6   19.42    0.40 
  -1   2   6   18.26    0.44 
   1   2  -6   20.12    0.43 
   0  -2  -6   39.73    0.80 
   0  -2   6   39.50    0.75 
   0   2   6   40.77    0.72 
   0   2  -6   40.99    0.70 
   0   2   6   41.76    0.66 
   0   2  -6   40.49    0.68 
  -1  -2  -6   27.19    0.62 
   1  -2   6   27.65    0.58 
  -1   2  -6   27.56    0.50 
   1   2   6   26.45    0.52 
  -1   2  -6   26.34    0.54 
  -2  -2  -6   40.96    0.82 
   2  -2   6   40.13    0.77 
  -2  -2  -6   40.58    0.73 
   2   2   6   41.22    0.69 
  -2   2  -6   41.91    0.67 
  -2   2  -6   41.11    0.75 
  -3  -2  -6    5.79    0.25 
  -3  -2  -6    5.82    0.27 
   3  -2   6    5.86    0.25 
   3   2   6    5.25    0.19 
  -3   2  -6    4.84    0.23 
  -3   2  -6    5.44    0.19 
  -4  -2  -6   73.95    1.24 
  -4  -2  -6   72.29    1.29 
   4  -2   6   72.93    1.23 
  -4   2  -6   75.15    1.13 
  -4   2  -6   71.69    1.22 
   4   2   6   75.00    1.09 
  -5  -2  -6  136.11    2.17 
   5  -2   6  138.34    2.08 
  -5   2  -6  138.05    2.10 
  -5   2  -6  145.35    2.00 
  -6  -2  -6   15.18    0.51 
   6  -2   6   15.47    0.47 
  -6   2  -6   15.62    0.49 
  -7  -2  -6   24.25    0.68 
   7  -2   6   23.95    0.62 
  -7   2  -6   25.21    0.68 
   7   2   6   25.15    0.70 
  -8  -2  -6    7.90    0.41 
   8  -2   6    7.62    0.35 
  -8   2  -6    8.37    0.40 
   8   2   6    8.00    0.40 
  -9  -2  -6   19.23    0.65 
   9   2   6   17.77    0.64 
  -9   2  -6   18.86    0.63 
 -10  -2  -6    9.61    0.49 
 -10   2  -6    9.57    0.48 
  10   2   6    9.58    0.49 
 -11  -2  -6    9.29    0.51 
  11   2   6    9.38    0.50 
 -11   2  -6    8.31    0.48 
 -12  -2  -6    7.98    0.49 
 -12   2  -6    6.80    0.46 
  12   2   6    8.01    0.49 
  13   2   6    0.80    0.25 
  13  -3  -6    0.45    0.24 
 -13   3   6    0.31    0.20 
  12  -3  -6    0.95    0.27 
 -12  -3   6    0.56    0.23 
 -12   3   6    0.73    0.23 
  11  -3  -6    9.08    0.53 
 -11  -3   6   10.35    0.56 
 -11   3   6   10.56    0.53 
 -10  -3   6   13.77    0.60 
  10  -3  -6   13.12    0.60 
 -10   3   6   13.03    0.55 
  -9  -3   6    0.31    0.15 
   9  -3  -6    1.06    0.22 
  -9   3   6    0.66    0.18 
  -8  -3   6    3.12    0.22 
   8  -3  -6    3.12    0.32 
  -8  -3   6    3.69    0.29 
  -8   3   6    3.31    0.26 
  -7  -3   6   26.40    0.73 
  -7  -3   6   26.75    0.65 
   7  -3  -6   24.93    0.74 
  -7   3   6   26.63    0.71 
  -6  -3   6   56.57    1.07 
  -6  -3   6   58.40    1.15 
   6  -3  -6   58.78    1.19 
  -6   3   6   59.15    1.14 
   5  -3  -6    3.40    0.24 
  -5  -3   6    3.27    0.22 
  -5  -3   6    3.18    0.20 
   5   3  -6    3.03    0.17 
  -5   3   6    3.37    0.22 
  -4  -3   6    2.71    0.18 
   4  -3  -6    2.70    0.21 
  -4  -3   6    2.55    0.19 
   4   3  -6    2.66    0.15 
  -4   3   6    2.81    0.19 
   3  -3  -6   22.89    0.60 
  -3  -3   6   23.26    0.55 
  -3  -3   6   23.31    0.53 
   3   3  -6   22.41    0.47 
  -3   3   6   22.47    0.54 
   2  -3  -6   21.29    0.56 
  -2  -3   6   20.90    0.51 
   2   3  -6   21.51    0.48 
   2   3  -6   20.90    0.45 
  -2   3   6   21.48    0.50 
   1  -3  -6   22.30    0.57 
  -1  -3   6   21.12    0.51 
   1   3  -6   21.58    0.45 
   1   3  -6   21.52    0.47 
  -1   3   6   20.79    0.48 
  -1   3   6   21.88    0.39 
   0  -3  -6   59.01    1.08 
   0  -3   6   58.91    1.01 
   0   3   6   57.59    0.88 
   0   3  -6   58.29    0.89 
   0   3  -6   56.15    0.94 
   0   3   6   57.26    0.94 
   1  -3   6    8.81    0.31 
  -1  -3  -6    9.03    0.35 
  -1   3  -6    8.36    0.29 
  -1   3  -6    9.14    0.22 
   1   3   6    9.02    0.26 
   1   3   6    8.84    0.26 
   2  -3   6    5.86    0.26 
  -2  -3  -6    6.70    0.30 
   2   3   6    6.14    0.20 
  -2   3  -6    5.86    0.25 
   2   3   6    6.54    0.24 
  -3  -3  -6   36.40    0.81 
   3  -3   6   37.56    0.76 
  -3   3  -6   36.23    0.73 
   3   3   6   36.93    0.60 
   3   3   6   35.46    0.72 
   4  -3   6   25.58    0.62 
  -4  -3  -6   27.81    0.69 
  -4   3  -6   25.77    0.62 
   4   3   6   26.42    0.62 
   5  -3   6   50.55    0.97 
  -5  -3  -6   49.05    1.03 
   5   3   6   46.39    0.95 
  -5   3  -6   47.78    0.95 
   6  -3   6    6.85    0.32 
  -6  -3  -6    6.50    0.34 
   6   3   6    6.40    0.32 
  -6   3  -6    6.74    0.32 
  -7  -3  -6    5.89    0.35 
   7  -3   6    5.95    0.32 
  -7   3  -6    5.59    0.32 
   7   3   6    5.49    0.32 
  -8  -3  -6    1.80    0.24 
   8  -3   6    2.06    0.23 
  -8   3  -6    1.65    0.22 
   8   3   6    1.95    0.24 
  -9  -3  -6   45.17    1.12 
   9  -3   6   45.75    1.02 
   9   3   6   44.46    1.07 
  -9   3  -6   46.03    1.07 
 -10  -3  -6    3.95    0.38 
  10   3   6    5.06    0.36 
 -10   3  -6    4.72    0.34 
 -11  -3  -6    0.55    0.20 
 -11   3  -6    0.66    0.20 
  11   3   6    0.58    0.20 
 -12  -3  -6   13.48    0.65 
 -12   3  -6   14.36    0.64 
  12   3   6   13.24    0.64 
 -13  -3  -6    3.71    0.43 
 -13   3  -6    3.79    0.42 
  13   3   6    3.42    0.41 
  13  -4  -6    2.87    0.40 
 -13   4   6    2.60    0.38 
 -12  -4   6    4.38    0.45 
  12  -4  -6    3.43    0.41 
 -12   4   6    5.00    0.42 
  11  -4  -6   13.26    0.63 
 -11  -4   6   13.56    0.64 
 -11   4   6   12.63    0.59 
  10  -4  -6    0.66    0.21 
 -10  -4   6    0.43    0.19 
 -10   4   6    0.66    0.19 
  -9  -4   6    2.44    0.30 
   9  -4  -6    2.78    0.31 
  -9   4   6    2.49    0.29 
  -8  -4   6    0.26    0.15 
   8  -4  -6    0.26    0.15 
  -8   4   6    0.43    0.15 
   7  -4  -6   14.76    0.56 
  -7  -4   6   15.29    0.55 
  -7  -4   6   15.37    0.48 
  -7   4   6   15.94    0.55 
   6  -4  -6   21.40    0.65 
  -6  -4   6   20.32    0.60 
  -6  -4   6   20.06    0.54 
   6   4  -6   21.07    0.52 
  -6   4   6   19.78    0.60 
  -5  -4   6   28.70    0.69 
  -5  -4   6   27.58    0.64 
   5  -4  -6   27.33    0.73 
   5   4  -6   27.21    0.59 
  -5   4   6   27.89    0.69 
   4  -4  -6   13.75    0.47 
  -4  -4   6   13.75    0.42 
  -4  -4   6   13.78    0.42 
   4   4  -6   13.37    0.38 
  -4   4   6   13.44    0.44 
  -3  -4   6    7.06    0.27 
   3  -4  -6    6.92    0.33 
  -3  -4   6    6.71    0.28 
   3   4  -6    7.17    0.26 
  -3   4   6    7.17    0.29 
   2  -4  -6   53.43    1.06 
  -2  -4   6   54.38    0.90 
  -2  -4   6   54.63    0.98 
  -2   4   6   53.21    0.79 
  -2   4   6   53.05    0.96 
   2   4  -6   53.04    0.92 
   1  -4  -6   84.64    1.48 
  -1  -4   6   84.57    1.39 
  -1   4   6   86.08    1.22 
  -1   4   6   86.27    1.34 
   1   4  -6   87.35    1.34 
   1   4  -6   87.35    1.28 
   0  -4  -6   35.83    0.81 
   0  -4   6   36.78    0.75 
   0   4  -6   38.61    0.73 
   0   4  -6   38.27    0.62 
   0   4   6   36.86    0.65 
   0   4   6   37.85    0.69 
   1  -4   6    6.75    0.28 
  -1  -4  -6    6.90    0.32 
   1   4   6    6.40    0.22 
   1   4   6    6.85    0.24 
  -1   4  -6    6.62    0.27 
  -2  -4  -6   63.59    1.22 
   2  -4   6   64.90    1.14 
   2   4   6   64.25    1.07 
   2   4   6   66.14    0.97 
  -2   4  -6   63.32    1.10 
  -3  -4  -6    1.74    0.20 
   3  -4   6    1.98    0.19 
  -3   4  -6    1.63    0.17 
   3   4   6    1.81    0.15 
   4  -4   6   79.85    1.40 
  -4  -4  -6   83.32    1.50 
   4   4   6   82.50    1.38 
  -4   4  -6   81.59    1.38 
  -5  -4  -6   43.18    0.99 
   5  -4   6   44.73    0.94 
   5   4   6   44.10    0.92 
  -5   4  -6   44.36    0.92 
   6  -4   6    6.71    0.34 
  -6  -4  -6    6.74    0.37 
   6   4   6    6.36    0.32 
  -6   4  -6    6.54    0.33 
   7  -4   6   29.79    0.78 
  -7  -4  -6   31.75    0.86 
  -7   4  -6   31.22    0.79 
   7   4   6   31.96    0.81 
  -8  -4  -6   25.44    0.79 
   8  -4   6   25.95    0.73 
  -8   4  -6   26.83    0.75 
   8   4   6   26.15    0.76 
  -9  -4  -6   20.14    0.72 
   9  -4   6   20.51    0.66 
   9   4   6   19.57    0.68 
  -9   4  -6   20.68    0.68 
 -10  -4  -6    3.27    0.36 
  10  -4   6    2.91    0.31 
 -10   4  -6    2.90    0.31 
  10   4   6    2.47    0.31 
 -11  -4  -6    7.11    0.48 
 -11   4  -6    6.91    0.44 
  11   4   6    7.37    0.46 
 -12  -4  -6    7.80    0.51 
 -12   4  -6    8.75    0.52 
  12   4   6    8.55    0.52 
 -13  -4  -6    7.35    0.53 
  13   4   6    7.12    0.51 
 -13   4  -6    7.76    0.51 
  12  -5  -6   20.70    0.85 
 -12  -5   6   22.51    0.89 
 -12   5   6   22.21    0.85 
  11  -5  -6    1.34    0.28 
 -11  -5   6    0.93    0.26 
 -11   5   6    1.17    0.26 
  10  -5  -6   54.57    1.33 
 -10  -5   6   55.55    1.35 
 -10   5   6   54.71    1.31 
  -9  -5   6    6.39    0.41 
   9  -5  -6    5.16    0.38 
  -9   5   6    5.68    0.38 
   8  -5  -6    0.34    0.16 
  -8  -5   6    0.54    0.17 
  -8   5   6    0.41    0.15 
  -7  -5   6   28.27    0.68 
  -7  -5   6   29.02    0.79 
   7  -5  -6   27.72    0.81 
  -7   5   6   28.15    0.78 
  -6  -5   6   10.42    0.43 
   6  -5  -6   10.21    0.46 
  -6  -5   6   10.49    0.38 
   6   5  -6   11.01    0.38 
  -6   5   6   10.19    0.44 
  -5  -5   6   25.01    0.65 
  -5  -5   6   24.94    0.61 
   5  -5  -6   24.57    0.70 
  -5   5   6   25.14    0.67 
   5   5  -6   25.57    0.61 
  -4  -5   6   18.35    0.50 
  -4  -5   6   16.58    0.48 
   4  -5  -6   18.18    0.58 
   4   5  -6   17.96    0.48 
  -4   5   6   18.40    0.54 
  -3  -5   6    5.71    0.25 
   3  -5  -6    5.34    0.30 
  -3  -5   6    5.88    0.26 
  -3   5   6    5.02    0.26 
   3   5  -6    5.40    0.26 
  -2  -5   6    3.81    0.22 
   2  -5  -6    3.61    0.26 
  -2  -5   6    3.62    0.19 
  -2   5   6    3.81    0.22 
   2   5  -6    3.97    0.22 
  -2   5   6    3.92    0.16 
  -1  -5   6   50.05    0.94 
   1  -5  -6   50.06    1.03 
   1   5  -6   48.84    0.91 
  -1   5   6   48.37    0.80 
  -1   5   6   49.10    0.89 
   0  -5   6   56.01    1.03 
   0  -5  -6   55.39    1.12 
   0   5   6   56.59    0.95 
   0   5   6   55.95    0.92 
   0   5  -6   54.95    1.00 
  -1  -5  -6   36.74    0.87 
   1  -5   6   37.24    0.79 
  -1   5  -6   36.48    0.77 
   1   5   6   38.23    0.72 
   1   5   6   38.53    0.68 
   2  -5   6   21.07    0.57 
  -2  -5  -6   20.81    0.62 
   2   5   6   21.75    0.52 
   2   5   6   21.07    0.42 
  -2   5  -6   20.65    0.55 
  -3  -5  -6   65.30    1.28 
   3  -5   6   64.38    1.20 
   3   5   6   64.04    1.13 
  -3   5  -6   64.11    1.16 
   4  -5   6    1.34    0.18 
  -4  -5  -6    1.23    0.20 
   4   5   6    1.28    0.16 
  -4   5  -6    1.22    0.16 
   5  -5   6    1.07    0.17 
  -5  -5  -6    1.03    0.19 
  -5   5  -6    0.85    0.15 
   5   5   6    1.09    0.16 
   6  -5   6   17.93    0.58 
  -6  -5  -6   17.11    0.61 
  -6   5  -6   17.11    0.55 
   6   5   6   17.63    0.57 
   7  -5   6    1.57    0.22 
  -7  -5  -6    1.64    0.24 
  -7   5  -6    1.69    0.22 
   7   5   6    2.15    0.25 
  -8  -5  -6    3.13    0.34 
   8  -5   6    2.95    0.30 
   8   5   6    2.82    0.29 
  -8   5  -6    3.14    0.30 
   9  -5   6   12.67    0.54 
  -9  -5  -6   11.89    0.57 
  -9   5  -6   11.95    0.52 
   9   5   6   12.13    0.54 
 -10  -5  -6    5.41    0.42 
  10  -5   6    5.22    0.38 
  10   5   6    5.61    0.39 
 -10   5  -6    5.32    0.37 
 -11  -5  -6    8.16    0.53 
  11   5   6    8.67    0.51 
 -11   5  -6   10.25    0.53 
 -12  -5  -6    0.66    0.24 
  12   5   6    0.76    0.23 
 -12   5  -6    0.43    0.19 
 -12  -6   6    0.06    0.20 
 -12   6   6    0.19    0.21 
  11  -6  -6   22.07    0.84 
 -11  -6   6   20.08    0.82 
 -11   6   6   19.84    0.79 
 -10  -6   6    0.42    0.20 
  10  -6  -6    0.18    0.18 
 -10   6   6    0.27    0.18 
   9  -6  -6   19.03    0.73 
  -9  -6   6   20.89    0.75 
  -9   6   6   19.81    0.72 
  -8  -6   6   13.38    0.56 
   8  -6  -6   12.03    0.55 
  -8   6   6   11.66    0.53 
  -7  -6   6   13.87    0.54 
   7  -6  -6   15.37    0.60 
   7   6  -6   14.91    0.50 
  -7   6   6   13.73    0.54 
   6  -6  -6    7.39    0.41 
  -6  -6   6    7.47    0.32 
  -6  -6   6    7.20    0.37 
   6   6  -6    8.44    0.36 
  -6   6   6    6.59    0.37 
  -5  -6   6   44.89    0.96 
  -5  -6   6   44.25    0.91 
   5  -6  -6   46.25    1.06 
   5   6  -6   45.99    0.93 
  -5   6   6   45.75    1.00 
  -4  -6   6   17.46    0.50 
   4  -6  -6   16.39    0.57 
  -4  -6   6   17.55    0.50 
  -4   6   6   15.78    0.52 
   4   6  -6   17.06    0.49 
  -3  -6   6   20.85    0.52 
   3  -6  -6   20.84    0.64 
  -3  -6   6   21.52    0.56 
   3   6  -6   21.00    0.56 
  -3   6   6   21.01    0.58 
  -2  -6   6   35.16    0.77 
   2  -6  -6   35.38    0.87 
  -2  -6   6   34.06    0.68 
  -2   6   6   35.49    0.65 
  -2   6   6   35.70    0.76 
   2   6  -6   35.88    0.77 
   1  -6  -6   83.56    1.54 
  -1  -6   6   84.99    1.43 
   1   6  -6   84.56    1.41 
  -1   6   6   82.58    1.28 
  -1   6   6   84.77    1.37 
   0  -6  -6    7.58    0.38 
   0  -6   6    8.17    0.34 
   0   6   6    8.32    0.29 
   0   6   6    8.52    0.29 
   0   6  -6    8.14    0.33 
  -1  -6  -6   18.59    0.60 
   1  -6   6   18.93    0.54 
   1   6   6   19.58    0.44 
  -1   6  -6   18.75    0.53 
   1   6   6   19.13    0.49 
  -2  -6  -6   29.48    0.79 
   2  -6   6   30.02    0.73 
   2   6   6   28.85    0.66 
  -2   6  -6   28.83    0.69 
   3  -6   6    3.99    0.27 
  -3  -6  -6    3.21    0.27 
   3   6   6    3.82    0.23 
  -3   6  -6    3.66    0.24 
   4  -6   6   62.59    1.24 
  -4  -6  -6   66.14    1.34 
  -4   6  -6   62.07    1.19 
   4   6   6   63.61    1.19 
   5  -6   6    3.51    0.28 
  -5  -6  -6    3.81    0.32 
  -5   6  -6    3.41    0.25 
   5   6   6    3.51    0.26 
  -6  -6  -6   14.07    0.57 
   6  -6   6   13.19    0.51 
  -6   6  -6   12.93    0.49 
   6   6   6   13.24    0.50 
  -7  -6  -6   11.29    0.53 
   7  -6   6   12.38    0.52 
  -7   6  -6   11.28    0.48 
   7   6   6   11.88    0.49 
   8  -6   6   43.38    1.07 
  -8  -6  -6   44.27    1.15 
   8   6   6   43.76    1.07 
  -8   6  -6   44.29    1.05 
  -9  -6  -6    2.70    0.34 
   9  -6   6    2.64    0.31 
   9   6   6    2.38    0.29 
  -9   6  -6    2.18    0.28 
  10  -6   6   11.64    0.56 
 -10  -6  -6   11.68    0.60 
 -10   6  -6   12.40    0.57 
  10   6   6   11.05    0.55 
  11  -6   6    0.40    0.21 
 -11  -6  -6    0.37    0.21 
 -11   6  -6    0.61    0.21 
  11   6   6    0.50    0.20 
 -12  -6  -6   15.05    0.75 
  12   6   6   14.70    0.70 
 -12   6  -6   16.17    0.70 
 -11  -7   6    2.00    0.33 
 -11   7   6    2.12    0.33 
 -10  -7   6    7.04    0.48 
 -10   7   6    6.02    0.45 
  -9  -7   6   24.11    0.83 
   9  -7  -6   23.01    0.81 
  -9   7   6   24.83    0.83 
  -8  -7   6    2.54    0.30 
   8  -7  -6    2.68    0.33 
  -8   7   6    2.85    0.32 
   7  -7  -6    9.83    0.49 
  -7  -7   6    9.50    0.46 
  -7   7   6    9.42    0.47 
   7   7  -6   10.53    0.44 
  -6  -7   6    2.26    0.25 
   6  -7  -6    1.94    0.27 
  -6   7   6    2.01    0.25 
   6   7  -6    2.00    0.23 
  -5  -7   6   14.64    0.50 
  -5  -7   6   13.85    0.45 
   5  -7  -6   14.45    0.57 
   5   7  -6   13.94    0.49 
  -5   7   6   14.27    0.53 
  -4  -7   6    1.17    0.16 
   4  -7  -6    0.91    0.18 
  -4  -7   6    1.22    0.17 
   4   7  -6    1.10    0.17 
  -4   7   6    1.20    0.18 
   3  -7  -6   18.09    0.62 
  -3  -7   6   18.06    0.53 
  -3  -7   6   17.98    0.49 
   3   7  -6   18.68    0.55 
  -3   7   6   18.13    0.55 
   2  -7  -6   37.16    0.93 
  -2  -7   6   37.75    0.82 
  -2   7   6   38.54    0.82 
   2   7  -6   37.32    0.84 
  -1  -7   6   16.86    0.51 
   1  -7  -6   14.94    0.56 
  -1   7   6   17.40    0.48 
  -1   7   6   16.53    0.44 
   1   7  -6   17.51    0.53 
   0  -7   6    8.73    0.36 
   0  -7  -6    8.13    0.41 
   0   7   6    8.19    0.31 
   0   7   6    8.86    0.32 
   0   7  -6    8.46    0.36 
   1  -7   6   60.77    1.17 
  -1  -7  -6   60.19    1.27 
   1   7   6   59.97    1.08 
  -2  -7  -6   19.90    0.66 
   2  -7   6   20.26    0.61 
  -2   7  -6   19.26    0.58 
   2   7   6   20.71    0.56 
   3  -7   6    7.56    0.37 
  -3  -7  -6    8.33    0.43 
  -3   7  -6    8.94    0.39 
   3   7   6    8.00    0.35 
  -4  -7  -6    0.45    0.17 
   4  -7   6    0.75    0.17 
   4   7   6    0.83    0.16 
  -4   7  -6    0.95    0.16 
  -5  -7  -6   14.60    0.59 
   5  -7   6   14.99    0.55 
  -5   7  -6   12.98    0.50 
   5   7   6   13.38    0.50 
   6  -7   6    0.72    0.18 
  -6  -7  -6    0.64    0.20 
  -6   7  -6    0.71    0.16 
   6   7   6    0.90    0.17 
   7  -7   6    0.84    0.19 
  -7  -7  -6    0.84    0.20 
   7   7   6    1.10    0.20 
  -7   7  -6    1.01    0.19 
  -8  -7  -6   10.19    0.55 
   8  -7   6   10.46    0.52 
  -8   7  -6    9.90    0.48 
   8   7   6   10.42    0.50 
  -9  -7  -6    5.88    0.44 
   9  -7   6    6.10    0.43 
   9   7   6    5.54    0.40 
  -9   7  -6    5.03    0.36 
  10  -7   6    9.77    0.54 
 -10  -7  -6    9.17    0.57 
  10   7   6    7.44    0.47 
 -10   7  -6    8.74    0.49 
  11  -7   6    5.99    0.46 
 -11  -7  -6    5.92    0.48 
 -11   7  -6    6.77    0.46 
  11   7   6    5.87    0.46 
 -11  -8   6    2.95    0.40 
 -11   8   6    2.98    0.40 
 -10  -8   6    0.84    0.26 
 -10   8   6    0.47    0.22 
  -9  -8   6    1.77    0.29 
  -9   8   6    1.47    0.27 
   8  -8  -6   29.17    0.92 
  -8  -8   6   27.33    0.86 
  -8   8   6   26.96    0.87 
  -7  -8   6   24.90    0.78 
   7  -8  -6   26.94    0.86 
   7   8  -6   25.75    0.76 
  -7   8   6   26.19    0.82 
   6  -8  -6   20.08    0.72 
  -6  -8   6   20.95    0.66 
   6   8  -6   20.23    0.64 
  -6   8   6   19.42    0.67 
  -5  -8   6    1.57    0.21 
   5  -8  -6    1.47    0.24 
  -5   8   6    1.14    0.20 
   5   8  -6    1.41    0.20 
   4  -8  -6   21.29    0.71 
  -4  -8   6   20.43    0.58 
   4   8  -6   21.75    0.65 
  -4   8   6   21.36    0.65 
   3  -8  -6   16.47    0.61 
  -3  -8   6   17.42    0.53 
   3   8  -6   16.42    0.55 
  -3   8   6   16.48    0.54 
   2  -8  -6   15.05    0.58 
  -2  -8   6   14.74    0.49 
  -2   8   6   15.58    0.50 
   2   8  -6   14.60    0.51 
   1  -8  -6   11.99    0.52 
  -1  -8   6   12.90    0.46 
  -1   8   6   13.16    0.43 
   1   8  -6   13.41    0.49 
  -1   8   6   12.76    0.41 
   0  -8  -6   25.17    0.76 
   0  -8   6   25.15    0.68 
   0   8  -6   24.58    0.69 
   0   8   6   25.60    0.62 
   1  -8   6    2.24    0.24 
  -1  -8  -6    2.22    0.27 
   1   8   6    2.40    0.19 
  -1   8  -6    2.05    0.23 
  -2  -8  -6   44.72    1.08 
   2  -8   6   43.06    1.00 
  -2   8  -6   42.95    0.98 
   2   8   6   44.27    0.93 
  -3  -8  -6   17.76    0.67 
   3  -8   6   18.26    0.61 
   3   8   6   18.58    0.57 
  -3   8  -6   18.56    0.60 
  -4  -8  -6    1.37    0.24 
   4  -8   6    1.64    0.23 
  -4   8  -6    1.56    0.21 
   4   8   6    1.61    0.21 
  -5  -8  -6    2.91    0.34 
   5  -8   6    2.95    0.30 
   5   8   6    3.48    0.27 
  -5   8  -6    3.38    0.27 
   6  -8   6    8.74    0.46 
  -6  -8  -6    8.47    0.49 
  -6   8  -6    9.48    0.45 
   6   8   6    9.21    0.45 
   7  -8   6   15.80    0.64 
  -7  -8  -6   16.50    0.70 
   7   8   6   16.45    0.63 
  -7   8  -6   17.36    0.63 
   8  -8   6    0.42    0.18 
  -8  -8  -6    0.41    0.20 
  -8   8  -6    0.53    0.18 
   8   8   6    0.45    0.17 
   9  -8   6    1.82    0.30 
  -9  -8  -6    1.81    0.32 
   9   8   6    1.82    0.28 
  -9   8  -6    2.09    0.28 
  10  -8   6    9.25    0.56 
 -10  -8  -6    9.23    0.58 
  10   8   6    9.57    0.54 
 -10   8  -6    9.10    0.52 
  11  -8   6    0.56    0.24 
 -11  -8  -6    0.35    0.23 
 -11   8  -6    0.67    0.22 
  11   8   6    0.31    0.22 
 -10  -9   6    2.52    0.37 
 -10   9   6    2.13    0.34 
  -9  -9   6   20.38    0.79 
  -9   9   6   21.11    0.81 
  -8  -9   6   13.91    0.62 
  -8   9   6   12.18    0.59 
   8   9  -6   12.29    0.56 
  -7  -9   6    0.28    0.15 
  -7   9   6    0.05    0.14 
   7   9  -6   -0.09    0.12 
   6  -9  -6    7.64    0.48 
   6   9  -6    8.56    0.43 
  -6   9   6    7.28    0.43 
   5  -9  -6   12.71    0.58 
   5   9  -6   11.99    0.51 
  -5   9   6   12.44    0.53 
   4  -9  -6   16.72    0.65 
  -4   9   6   15.94    0.58 
   4   9  -6   16.08    0.59 
   3  -9  -6   33.49    0.94 
  -3  -9   6   32.73    0.80 
  -3   9   6   33.19    0.84 
   3   9  -6   32.18    0.86 
  -2  -9   6   37.27    0.87 
   2  -9  -6   36.64    0.99 
  -2   9   6   37.91    0.87 
   2   9  -6   35.86    0.91 
   1  -9  -6   26.84    0.82 
  -1  -9   6   25.74    0.71 
  -1   9   6   26.73    0.66 
  -1   9   6   27.29    0.68 
   1   9  -6   25.88    0.75 
   0  -9   6   25.40    0.71 
   0  -9  -6   23.23    0.76 
   0   9   6   24.25    0.64 
   0   9  -6   24.78    0.72 
   1  -9   6   17.12    0.58 
  -1  -9  -6   17.86    0.66 
  -1   9  -6   17.08    0.59 
   1   9   6   18.26    0.56 
   2  -9   6    4.28    0.31 
  -2  -9  -6    5.36    0.38 
  -2   9  -6    4.85    0.33 
   2   9   6    4.95    0.29 
   3  -9   6   14.62    0.57 
  -3  -9  -6   14.12    0.62 
   3   9   6   14.11    0.52 
  -3   9  -6   15.63    0.57 
  -4  -9  -6   12.91    0.59 
   4  -9   6   13.84    0.57 
  -4   9  -6   13.74    0.54 
   4   9   6   13.85    0.53 
   5  -9   6   10.14    0.50 
  -5  -9  -6   10.99    0.55 
  -5   9  -6   10.18    0.47 
   5   9   6   10.80    0.48 
  -6  -9  -6    8.38    0.51 
   6  -9   6    8.21    0.47 
  -6   9  -6    8.21    0.43 
   6   9   6    8.36    0.45 
  -7  -9  -6    5.26    0.43 
   7  -9   6    5.57    0.42 
   7   9   6    5.34    0.37 
  -7   9  -6    6.14    0.39 
   8  -9   6    2.38    0.33 
  -8  -9  -6    2.52    0.36 
   8   9   6    2.80    0.33 
  -8   9  -6    3.06    0.34 
   9  -9   6    0.28    0.21 
  -9  -9  -6    0.54    0.24 
  -9   9  -6    0.74    0.21 
   9   9   6    0.37    0.19 
  10  -9   6    0.19    0.21 
 -10  -9  -6    0.03    0.20 
 -10   9  -6   -0.05    0.16 
  10   9   6    0.04    0.19 
 -10 -10   6    5.50    0.52 
  -9 -10   6    3.13    0.39 
  -9  10   6    3.19    0.39 
   8  10  -6    8.15    0.49 
  -8  10   6    8.34    0.52 
   7  10  -6    6.70    0.42 
  -7  10   6    6.63    0.46 
   6  10  -6   16.58    0.64 
  -6  10   6   17.65    0.69 
   5  10  -6   10.31    0.50 
  -5  10   6   10.70    0.52 
   4 -10  -6   10.27    0.54 
  -4  10   6   10.17    0.48 
   4  10  -6   10.80    0.51 
   3 -10  -6    1.01    0.23 
  -3  10   6    0.46    0.17 
   3  10  -6    1.02    0.20 
   2 -10  -6    8.98    0.50 
  -2 -10   6    8.87    0.42 
  -2  10   6    9.38    0.42 
   2  10  -6    8.56    0.44 
   1 -10  -6    7.11    0.44 
  -1 -10   6    8.18    0.41 
   1  10  -6    7.29    0.41 
   0 -10  -6    9.77    0.50 
   0 -10   6    8.56    0.43 
   0  10  -6    8.48    0.44 
   0  10   6    8.49    0.39 
  -1 -10  -6    0.85    0.21 
   1 -10   6    1.02    0.20 
  -1  10  -6    0.98    0.20 
   1  10   6    0.94    0.17 
   2 -10   6   12.93    0.55 
  -2 -10  -6   13.65    0.60 
   2  10   6   13.42    0.52 
  -2  10  -6   13.44    0.55 
   3 -10   6    6.20    0.39 
  -3 -10  -6    5.61    0.41 
  -3  10  -6    6.19    0.38 
   3  10   6    6.12    0.37 
   4 -10   6   23.50    0.78 
  -4 -10  -6   24.26    0.85 
  -4  10  -6   25.02    0.78 
   4  10   6   24.15    0.75 
   5 -10   6    8.33    0.47 
  -5 -10  -6    7.17    0.49 
  -5  10  -6    7.72    0.44 
   5  10   6    7.47    0.43 
   6 -10   6   15.60    0.66 
  -6 -10  -6   15.89    0.72 
   6  10   6   16.50    0.65 
  -6  10  -6   16.21    0.64 
   7 -10   6   11.40    0.59 
  -7 -10  -6   10.55    0.60 
   7  10   6   11.08    0.55 
  -7  10  -6   11.03    0.54 
  -8 -10  -6   13.34    0.70 
   8 -10   6   13.05    0.66 
   8  10   6   13.28    0.62 
  -8  10  -6   13.38    0.61 
   9 -10   6   10.20    0.60 
  -9 -10  -6    9.45    0.61 
  -9  10  -6    9.60    0.54 
   9  10   6    9.04    0.54 
  -8  11   6    3.79    0.42 
   8  11  -6    4.38    0.43 
  -7  11   6    3.59    0.40 
   7  11  -6    3.88    0.39 
  -6  11   6    2.02    0.29 
   6  11  -6    2.22    0.30 
  -5  11   6    1.31    0.24 
   5  11  -6    1.59    0.27 
   4  11  -6   10.46    0.53 
  -4  11   6   11.54    0.52 
   3  11  -6    0.01    0.13 
  -3  11   6    0.04    0.14 
   2 -11  -6    0.37    0.19 
   2  11  -6    0.58    0.19 
   1 -11  -6   11.86    0.59 
  -1 -11   6   12.17    0.52 
   1  11  -6   13.60    0.58 
   0 -11  -6   44.70    1.18 
   0 -11   6   46.42    1.10 
   0  11   6   46.19    1.05 
   0  11  -6   46.52    1.15 
   1 -11   6    2.56    0.30 
  -1 -11  -6    2.01    0.30 
  -1  11  -6    1.85    0.27 
   1  11   6    3.05    0.30 
   2 -11   6    0.43    0.18 
  -2 -11  -6    0.60    0.22 
   2  11   6    0.50    0.16 
  -2  11  -6    0.74    0.20 
  -3 -11  -6   21.24    0.81 
   3 -11   6   22.55    0.78 
  -3  11  -6   22.92    0.77 
   3  11   6   23.91    0.75 
   4 -11   6    2.87    0.35 
  -4 -11  -6    2.08    0.32 
   4  11   6    2.43    0.29 
  -4  11  -6    2.29    0.30 
   5 -11   6    6.41    0.45 
  -5 -11  -6    5.41    0.44 
   5  11   6    5.94    0.40 
  -5  11  -6    6.51    0.41 
   6 -11   6   14.11    0.67 
  -6 -11  -6   13.57    0.68 
  -6  11  -6   14.41    0.62 
   6  11   6   13.62    0.62 
   7 -11   6    8.71    0.55 
  -7 -11  -6    7.76    0.56 
  -7  11  -6    7.38    0.47 
   7  11   6    7.80    0.49 
  -8 -11  -6    4.79    0.51 
   8 -11   6    5.80    0.48 
  -8  11  -6    4.81    0.39 
   8  11   6    4.59    0.45 
  -7  12   6    0.11    0.20 
   7  12  -6    0.48    0.23 
   6  12  -6    2.90    0.36 
  -6  12   6    3.47    0.38 
   5  12  -6   14.37    0.66 
  -5  12   6   12.86    0.60 
   4  12  -6    2.73    0.34 
  -4  12   6    3.74    0.37 
   3  12  -6    0.28    0.17 
   2  12  -6    9.92    0.53 
   1 -12  -6   15.14    0.68 
   1  12  -6   14.86    0.64 
   0 -12   6    0.74    0.20 
   0 -12  -6    0.74    0.24 
   0  12   6    0.81    0.19 
   0  12  -6    1.04    0.22 
  -1 -12  -6    3.31    0.39 
   1 -12   6    4.17    0.35 
  -1  12  -6    3.32    0.36 
   1  12   6    3.70    0.35 
  -2 -12  -6    0.29    0.20 
   2 -12   6    0.08    0.16 
  -2  12  -6    0.19    0.16 
   2  12   6    0.41    0.15 
   3 -12   6    2.27    0.31 
  -3 -12  -6    2.11    0.33 
   3  12   6    2.44    0.30 
  -3  12  -6    1.97    0.30 
   4 -12   6   12.99    0.62 
  -4 -12  -6   13.73    0.68 
   4  12   6   13.16    0.61 
  -4  12  -6   13.58    0.62 
   5 -12   6    7.62    0.51 
  -5 -12  -6    7.86    0.55 
  -5  12  -6    7.99    0.48 
   5  12   6    7.40    0.48 
  -6 -12  -6    6.21    0.50 
   6 -12   6    6.39    0.49 
  -6  12  -6    6.80    0.45 
   6  12   6    5.98    0.45 
   7 -12   6   11.02    0.64 
  -7 -12  -6   10.54    0.64 
  -7  12  -6   10.41    0.57 
   7  12   6   10.28    0.58 
  -6  13   6    8.92    0.56 
   6  13  -6   10.49    0.62 
   5  13  -6    0.67    0.24 
  -5  13   6    0.61    0.24 
   4  13  -6    1.27    0.27 
   3  13  -6    4.26    0.44 
   2  13  -6    2.60    0.35 
   1  13  -6   12.75    0.62 
   0  13  -6    9.30    0.54 
   1 -13   6    1.10    0.24 
  -1 -13  -6    1.17    0.29 
  -1  13  -6    1.44    0.28 
   1  13   6    1.50    0.26 
  -2 -13  -6    5.03    0.48 
   2 -13   6    5.02    0.41 
  -2  13  -6    5.52    0.42 
   2  13   6    5.72    0.41 
  -3 -13  -6   13.47    0.68 
   3 -13   6   13.21    0.63 
  -3  13  -6   12.74    0.63 
   3  13   6   13.11    0.61 
   4 -13   6    2.11    0.33 
  -4 -13  -6    2.02    0.37 
   4  13   6    2.01    0.30 
  -4  13  -6    1.77    0.31 
  -5 -13  -6    6.56    0.53 
   5 -13   6    6.39    0.50 
  -5  13  -6    6.64    0.46 
   5  13   6    6.38    0.47 
  -6 -13  -6    2.68    0.42 
   6  13   6    2.76    0.39 
  -6  13  -6    2.50    0.36 
   3  14  -6    1.35    0.32 
   2  14  -6   18.06    0.79 
   1  14  -6    5.64    0.46 
   0  14  -6    0.19    0.21 
  -1  14  -6    0.89    0.25 
   2 -14   6    9.86    0.57 
  -2  14  -6    9.25    0.58 
   2  14   6   10.21    0.56 
   3 -14   6    1.30    0.29 
   3  14   6    1.22    0.26 
  -3  14  -6    0.88    0.25 
  13   0  -7   24.81    0.98 
  12   0  -7    1.09    0.28 
  11   0  -7   18.93    0.77 
 -11   0   7   19.62    0.69 
 -10   0   7    1.59    0.23 
  10   0  -7    1.99    0.30 
   9   0  -7    0.74    0.20 
  -9   0   7    0.87    0.18 
  -8   0   7    1.62    0.21 
   8   0  -7    1.48    0.22 
  -7   0   7   25.17    0.67 
   7   0  -7   25.74    0.74 
   6   0  -7    0.77    0.15 
  -6   0   7    0.50    0.11 
   5   0  -7   57.94    1.14 
  -5   0   7   58.71    1.09 
   4   0  -7   50.17    0.99 
  -4   0   7   48.81    0.95 
   3   0  -7    1.85    0.18 
  -3   0   7    1.39    0.15 
  -2   0   7   53.70    0.97 
   2   0  -7   54.56    0.76 
   2   0  -7   52.53    0.97 
  -1   0   7    1.00    0.13 
   1   0  -7    0.63    0.07 
   1   0  -7    0.70    0.11 
   0   0   7   24.19    0.55 
   0   0  -7   24.96    0.56 
   0   0  -7   24.58    0.47 
   1   0   7   53.04    0.93 
  -1   0  -7   52.93    0.94 
  -1   0  -7   53.72    0.87 
  -2   0  -7    1.93    0.15 
   2   0   7    1.85    0.15 
  -2   0  -7    2.28    0.15 
  -3   0  -7   15.95    0.43 
   3   0   7   15.42    0.41 
  -3   0  -7   15.99    0.43 
  -4   0  -7    7.80    0.31 
  -4   0  -7    8.32    0.31 
   4   0   7    7.16    0.27 
   5   0   7   87.25    1.37 
  -5   0  -7   87.42    1.47 
  -5   0  -7   88.70    1.46 
  -6   0  -7    5.16    0.27 
  -6   0  -7    5.34    0.29 
   6   0   7    5.40    0.25 
  -7   0  -7    1.23    0.19 
  -7   0  -7    1.21    0.17 
  -8   0  -7    1.52    0.20 
  -8   0  -7    1.25    0.21 
  -9   0  -7   34.99    0.94 
 -10   0  -7    1.32    0.24 
  12   0   7    8.90    0.54 
  13   0   7    0.05    0.18 
  13  -1  -7    1.32    0.32 
  13   1  -7    1.55    0.34 
  12  -1  -7    6.14    0.49 
 -12   1   7    7.16    0.46 
  12   1  -7    7.59    0.53 
  11  -1  -7    0.57    0.21 
 -11   1   7    0.21    0.15 
  11   1  -7    0.68    0.23 
 -10  -1   7   23.11    0.71 
  10  -1  -7   22.93    0.81 
  10   1  -7   22.13    0.80 
 -10   1   7   22.34    0.72 
   9  -1  -7   13.89    0.59 
  -9  -1   7   13.86    0.52 
  -9   1   7   13.70    0.53 
   9   1  -7   12.97    0.58 
  -8  -1   7   13.53    0.49 
   8  -1  -7   13.58    0.56 
   8   1  -7   13.20    0.54 
  -8   1   7   13.12    0.49 
   7  -1  -7    7.81    0.40 
  -7  -1   7    6.92    0.32 
   7   1  -7    7.42    0.39 
  -7   1   7    7.63    0.36 
   6  -1  -7  121.14    2.05 
  -6  -1   7  122.86    1.96 
   6   1  -7  125.02    2.05 
  -6   1   7  126.28    1.99 
   5  -1  -7   23.36    0.64 
  -5  -1   7   22.91    0.59 
  -5   1   7   22.08    0.58 
   5   1  -7   22.82    0.62 
  -4  -1   7    2.73    0.19 
   4  -1  -7    2.65    0.20 
  -4   1   7    2.79    0.19 
   4   1  -7    2.51    0.19 
  -3  -1   7   52.27    0.97 
   3  -1  -7   52.67    1.01 
   3   1  -7   54.41    0.78 
   3   1  -7   52.09    0.98 
  -3   1   7   50.65    0.96 
   2  -1  -7   59.12    1.08 
  -2  -1   7   59.36    1.06 
   2   1  -7   59.68    1.04 
  -2   1   7   57.63    1.04 
   2   1  -7   62.30    0.88 
  -1  -1   7   20.05    0.50 
   1  -1  -7   20.20    0.52 
   1  -1  -7   20.85    0.37 
  -1   1   7   19.28    0.48 
   1   1  -7   19.89    0.40 
   1   1  -7   20.00    0.48 
   0  -1   7   59.46    1.03 
   0  -1  -7   59.76    0.91 
   0  -1  -7   59.74    1.07 
   0   1  -7   61.64    0.94 
   0   1  -7   59.87    1.00 
   0   1   7   60.45    1.02 
  -1  -1  -7  105.93    1.51 
   1  -1   7  106.45    1.61 
  -1  -1  -7  105.89    1.65 
   1   1   7  105.31    1.57 
  -1   1  -7  105.43    1.53 
  -1   1  -7  103.86    1.57 
   2  -1   7   20.04    0.49 
  -2  -1  -7   19.67    0.52 
  -2  -1  -7   20.31    0.46 
  -2   1  -7   20.73    0.47 
  -2   1  -7   20.06    0.47 
   2   1   7   20.01    0.46 
  -3  -1  -7   63.88    1.07 
   3  -1   7   62.39    1.06 
  -3  -1  -7   62.78    1.12 
  -3   1  -7   61.34    1.03 
  -3   1  -7   62.32    1.07 
   3   1   7   61.24    1.01 
  -4  -1  -7   36.93    0.78 
   4  -1   7   38.02    0.76 
  -4  -1  -7   38.58    0.81 
  -4   1  -7   38.33    0.79 
  -4   1  -7   39.63    0.74 
   4   1   7   38.65    0.70 
  -5  -1  -7   66.09    1.21 
  -5  -1  -7   64.83    1.19 
   5  -1   7   64.96    1.13 
  -5   1  -7   64.01    1.18 
  -5   1  -7   66.31    1.13 
   5   1   7   66.70    1.06 
   6  -1   7   46.50    0.90 
  -6  -1  -7   46.33    0.97 
  -6  -1  -7   46.67    0.99 
  -6   1  -7   45.65    0.97 
  -6   1  -7   46.96    0.91 
  -7  -1  -7    7.28    0.35 
  -7  -1  -7    7.09    0.36 
   7  -1   7    7.66    0.33 
  -7   1  -7    7.35    0.37 
  -8  -1  -7    4.33    0.31 
  -8  -1  -7    5.17    0.32 
  -8   1  -7    4.55    0.31 
  -9  -1  -7   11.81    0.50 
  -9   1  -7   11.92    0.52 
 -10  -1  -7   48.03    1.15 
  10   1   7   49.15    1.20 
 -10   1  -7   46.05    1.16 
 -11   1  -7    3.34    0.37 
  11   1   7    3.78    0.40 
 -12   1  -7   11.73    0.59 
  12   1   7   11.80    0.61 
  13  -1   7   10.17    0.59 
  13   1   7   10.29    0.59 
  13  -2  -7   10.01    0.65 
  13   2  -7   10.36    0.67 
  12  -2  -7   10.38    0.61 
 -12   2   7   10.12    0.54 
  12   2  -7    9.06    0.58 
  11  -2  -7    1.35    0.28 
 -11   2   7    1.53    0.27 
  11   2  -7    1.15    0.26 
  10  -2  -7   11.31    0.57 
  10   2  -7   10.62    0.55 
 -10   2   7   11.62    0.52 
  -9  -2   7    6.21    0.34 
   9  -2  -7    5.08    0.37 
  -9   2   7    5.72    0.36 
  -8  -2   7    2.90    0.24 
   8  -2  -7    2.53    0.29 
  -8   2   7    3.26    0.26 
   7  -2  -7   30.15    0.83 
  -7  -2   7   31.19    0.75 
   7   2  -7   30.30    0.82 
  -7   2   7   30.61    0.78 
   6  -2  -7   18.37    0.60 
  -6  -2   7   18.91    0.54 
  -6   2   7   17.80    0.54 
   6   2  -7   19.07    0.59 
  -5  -2   7  112.24    1.78 
   5  -2  -7  110.53    1.86 
  -5   2   7  110.89    1.80 
   5   2  -7  111.10    1.83 
  -4  -2   7   34.77    0.76 
   4   2  -7   38.51    0.80 
   4   2  -7   37.17    0.62 
  -4   2   7   35.30    0.77 
  -3  -2   7   21.87    0.55 
   3  -2  -7   22.51    0.59 
  -3   2   7   21.22    0.54 
   3   2  -7   21.52    0.54 
   3   2  -7   22.35    0.44 
   2  -2  -7   81.10    1.38 
  -2  -2   7   79.04    1.33 
  -2   2   7   78.24    1.30 
   2   2  -7   80.43    1.29 
   2   2  -7   82.82    1.18 
   1  -2  -7   16.27    0.48 
  -1  -2   7   15.95    0.45 
   1   2  -7   16.36    0.40 
  -1   2   7   16.15    0.32 
   1   2  -7   15.97    0.37 
  -1   2   7   15.91    0.42 
   0  -2  -7    9.57    0.35 
   0  -2   7    8.88    0.32 
   0   2   7    8.87    0.29 
   0   2  -7    8.87    0.27 
   0   2  -7    8.69    0.27 
   0   2   7    9.20    0.25 
  -1  -2  -7   21.62    0.56 
   1  -2   7   21.17    0.52 
   1   2   7   20.87    0.47 
  -1   2  -7   22.06    0.46 
  -1   2  -7   21.52    0.48 
  -2  -2  -7   37.20    0.71 
   2  -2   7   35.82    0.74 
  -2  -2  -7   38.42    0.81 
  -2   2  -7   38.70    0.67 
  -2   2  -7   37.98    0.73 
   2   2   7   38.15    0.69 
  -3  -2  -7    9.13    0.33 
  -3  -2  -7    9.77    0.37 
   3  -2   7   10.35    0.35 
   3   2   7    9.75    0.28 
  -3   2  -7    9.54    0.34 
  -3   2  -7    9.56    0.28 
  -4  -2  -7    2.25    0.21 
  -4  -2  -7    2.51    0.21 
   4  -2   7    2.48    0.18 
  -4   2  -7    2.58    0.19 
  -4   2  -7    2.59    0.15 
   4   2   7    2.64    0.16 
   5  -2   7   13.13    0.43 
  -5  -2  -7   14.40    0.48 
  -5  -2  -7   13.38    0.45 
  -5   2  -7   14.60    0.47 
   6  -2   7   19.19    0.54 
  -6  -2  -7   20.17    0.60 
  -6   2  -7   18.52    0.57 
  -7  -2  -7    6.35    0.34 
   7  -2   7    5.63    0.30 
   7   2   7    5.95    0.34 
  -7   2  -7    5.24    0.32 
   8  -2   7   22.08    0.62 
  -8  -2  -7   21.05    0.68 
  -8   2  -7   20.54    0.66 
   8   2   7   21.95    0.69 
  -9  -2  -7   24.27    0.76 
  -9   2  -7   24.58    0.75 
   9   2   7   24.36    0.77 
 -10  -2  -7    9.48    0.49 
 -10   2  -7    8.70    0.47 
  10   2   7    9.30    0.49 
 -11  -2  -7   16.76    0.68 
  11   2   7   18.23    0.71 
 -11   2  -7   15.26    0.65 
 -12   2  -7    6.84    0.48 
  12   2   7    5.76    0.45 
 -13   2  -7    0.56    0.23 
  13   2   7    0.57    0.23 
  13  -3  -7    5.02    0.53 
 -13   3   7    4.38    0.45 
  12  -3  -7    2.89    0.40 
 -12   3   7    3.51    0.39 
  11  -3  -7    4.75    0.45 
 -11   3   7    5.64    0.41 
  10  -3  -7    0.27    0.18 
 -10  -3   7   -0.12    0.13 
 -10   3   7    0.11    0.15 
   9  -3  -7   25.63    0.83 
  -9  -3   7   26.59    0.72 
  -9  -3   7   26.23    0.82 
  -9   3   7   26.38    0.79 
   8  -3  -7    6.32    0.39 
  -8  -3   7    7.03    0.39 
  -8  -3   7    7.38    0.35 
  -8   3   7    7.39    0.39 
   7  -3  -7   56.26    1.24 
  -7  -3   7   57.91    1.20 
  -7  -3   7   57.71    1.11 
  -7   3   7   55.64    1.17 
   6  -3  -7    6.55    0.37 
  -6  -3   7    7.08    0.35 
  -6  -3   7    6.63    0.31 
  -6   3   7    6.38    0.33 
   5  -3  -7   16.39    0.55 
  -5  -3   7   15.97    0.48 
  -5   3   7   16.68    0.52 
  -4  -3   7   13.43    0.43 
   4  -3  -7   13.26    0.47 
  -4   3   7   13.69    0.44 
   4   3  -7   14.12    0.44 
   4   3  -7   13.80    0.36 
   3  -3  -7    7.72    0.35 
  -3  -3   7    7.49    0.30 
   3   3  -7    7.69    0.29 
   3   3  -7    6.92    0.25 
  -3   3   7    7.29    0.31 
   2  -3  -7    8.55    0.36 
  -2  -3   7    8.87    0.33 
  -2   3   7    8.10    0.30 
   2   3  -7    8.72    0.28 
   2   3  -7    8.65    0.29 
   1  -3  -7    6.04    0.29 
  -1  -3   7    5.18    0.25 
  -1   3   7    4.89    0.23 
   1   3  -7    5.59    0.21 
   1   3  -7    5.33    0.22 
  -1   3   7    5.18    0.17 
   0  -3  -7    1.18    0.16 
   0  -3   7    1.24    0.15 
   0   3  -7    1.43    0.14 
   0   3   7    1.63    0.14 
   0   3   7    1.77    0.11 
   0   3  -7    1.44    0.11 
   1  -3   7   14.34    0.42 
  -1  -3  -7   13.60    0.45 
   1   3   7   13.38    0.35 
  -1   3  -7   13.76    0.31 
   1   3   7   13.36    0.35 
  -1   3  -7   13.15    0.38 
   2  -3   7   63.26    1.11 
  -2  -3  -7   62.50    1.18 
   2   3   7   61.68    1.04 
  -2   3  -7   64.16    0.94 
   2   3   7   61.94    0.99 
  -2   3  -7   62.27    1.08 
  -3  -3  -7   65.60    1.24 
   3  -3   7   63.94    1.15 
  -3   3  -7   65.18    1.13 
   3   3   7   66.57    1.01 
   3   3   7   63.55    1.11 
   4  -3   7   54.93    1.05 
  -4  -3  -7   54.12    1.11 
   4   3   7   54.68    1.03 
  -4   3  -7   55.18    1.04 
   5  -3   7   94.73    1.57 
  -5  -3  -7   93.54    1.65 
   5   3   7   90.52    1.55 
  -5   3  -7   93.38    1.56 
  -6  -3  -7   83.75    1.55 
   6  -3   7   83.73    1.47 
  -6   3  -7   83.22    1.49 
   6   3   7   83.72    1.49 
  -7  -3  -7   35.11    0.91 
   7  -3   7   35.83    0.84 
   7   3   7   36.67    0.89 
  -7   3  -7   35.41    0.87 
  -8  -3  -7   25.87    0.79 
   8  -3   7   29.02    0.76 
  -8   3  -7   28.17    0.79 
   8   3   7   27.76    0.79 
  -9  -3  -7   14.96    0.61 
  -9   3  -7   16.00    0.61 
   9   3   7   16.46    0.61 
 -10  -3  -7   26.05    0.84 
  10   3   7   27.16    0.85 
 -10   3  -7   26.41    0.83 
 -11  -3  -7   26.38    0.89 
  11   3   7   26.35    0.88 
 -11   3  -7   27.84    0.89 
 -12  -3  -7   24.11    0.88 
 -12   3  -7   21.77    0.82 
  12   3   7   20.83    0.82 
  13   3   7    1.91    0.33 
 -13   3  -7    1.43    0.30 
  12  -4  -7    7.38    0.54 
 -12  -4   7    6.91    0.52 
 -12   4   7    7.65    0.50 
 -11  -4   7    0.32    0.18 
  11  -4  -7    0.32    0.21 
 -11   4   7    0.31    0.18 
  10  -4  -7    3.44    0.37 
 -10  -4   7    3.48    0.38 
 -10   4   7    2.99    0.33 
   9  -4  -7    2.97    0.34 
  -9  -4   7    2.83    0.32 
  -9   4   7    3.00    0.31 
  -8  -4   7    4.38    0.32 
  -8  -4   7    4.31    0.28 
   8  -4  -7    4.64    0.36 
  -8   4   7    5.27    0.34 
   7  -4  -7   23.44    0.75 
  -7  -4   7   25.53    0.74 
  -7  -4   7   25.16    0.66 
  -7   4   7   25.30    0.73 
  -6  -4   7   26.06    0.71 
  -6  -4   7   26.80    0.67 
   6  -4  -7   26.97    0.77 
  -6   4   7   26.97    0.72 
  -5  -4   7   27.66    0.67 
   5  -4  -7   27.21    0.75 
  -5  -4   7   27.97    0.69 
  -5   4   7   26.63    0.70 
   5   4  -7   27.18    0.59 
   4  -4  -7   27.12    0.74 
  -4  -4   7   27.91    0.67 
  -4  -4   7   27.32    0.65 
   4   4  -7   28.77    0.60 
  -4   4   7   27.75    0.69 
   3  -4  -7   38.06    0.89 
  -3  -4   7   38.60    0.81 
   3   4  -7   38.60    0.73 
  -3   4   7   37.31    0.80 
   3   4  -7   38.31    0.77 
   2  -4  -7   17.40    0.55 
  -2  -4   7   17.91    0.50 
   2   4  -7   17.61    0.45 
  -2   4   7   18.55    0.49 
   2   4  -7   17.97    0.44 
  -1  -4   7   71.48    1.25 
   1  -4  -7   69.62    1.32 
   1   4  -7   71.70    1.12 
  -1   4   7   72.33    1.19 
  -1   4   7   71.64    1.05 
   1   4  -7   72.63    1.17 
   0  -4   7   22.38    0.57 
   0  -4  -7   23.24    0.63 
   0   4   7   22.50    0.51 
   0   4  -7   22.99    0.54 
   0   4   7   22.57    0.47 
   0   4  -7   23.51    0.45 
  -1  -4  -7   46.20    0.98 
   1  -4   7   44.47    0.90 
   1   4   7   45.37    0.80 
  -1   4  -7   44.71    0.86 
   1   4   7   45.28    0.79 
  -2  -4  -7    8.44    0.37 
   2  -4   7    6.74    0.31 
  -2   4  -7    7.92    0.31 
   2   4   7    7.98    0.29 
   2   4   7    8.36    0.25 
   3  -4   7    2.69    0.22 
  -3  -4  -7    2.37    0.24 
  -3   4  -7    2.13    0.21 
   3   4   7    2.78    0.19 
  -4  -4  -7   19.08    0.60 
   4  -4   7   18.19    0.55 
  -4   4  -7   17.83    0.52 
   4   4   7   19.09    0.53 
  -5  -4  -7   23.68    0.70 
   5  -4   7   24.57    0.66 
   5   4   7   23.84    0.64 
  -5   4  -7   24.41    0.65 
   6  -4   7    5.81    0.33 
  -6  -4  -7    5.20    0.35 
   6   4   7    5.15    0.31 
  -6   4  -7    5.81    0.32 
  -7  -4  -7    8.56    0.44 
   7  -4   7    7.69    0.38 
  -7   4  -7    8.44    0.40 
   7   4   7    8.87    0.41 
   8  -4   7    2.72    0.28 
  -8  -4  -7    2.43    0.29 
  -8   4  -7    2.64    0.29 
   8   4   7    2.43    0.28 
  -9  -4  -7   12.64    0.59 
   9  -4   7   13.59    0.54 
   9   4   7   13.09    0.56 
  -9   4  -7   13.00    0.55 
 -10  -4  -7    8.47    0.50 
  10   4   7    9.19    0.49 
 -10   4  -7    8.95    0.49 
 -11  -4  -7   29.14    0.96 
 -11   4  -7   27.51    0.90 
  11   4   7   26.97    0.90 
 -12  -4  -7    6.49    0.48 
  12   4   7    5.18    0.42 
 -12   4  -7    5.33    0.42 
 -12  -5   7    5.05    0.50 
  12  -5  -7    5.65    0.54 
 -12   5   7    4.77    0.46 
 -11  -5   7    2.65    0.36 
  11  -5  -7    2.31    0.35 
 -11   5   7    3.19    0.37 
 -10  -5   7   11.71    0.59 
  10  -5  -7   10.65    0.57 
 -10   5   7   11.44    0.56 
   9  -5  -7    1.36    0.25 
  -9  -5   7    1.73    0.27 
  -9   5   7    1.47    0.24 
  -8  -5   7   10.17    0.49 
   8  -5  -7    8.82    0.48 
  -8   5   7    9.06    0.46 
  -7  -5   7    0.57    0.13 
  -7  -5   7    0.36    0.15 
   7  -5  -7    0.33    0.16 
  -7   5   7    0.54    0.16 
  -6  -5   7   14.27    0.51 
  -6  -5   7   13.69    0.46 
   6  -5  -7   13.38    0.55 
  -6   5   7   13.55    0.51 
  -5  -5   7    8.90    0.36 
   5  -5  -7    8.60    0.43 
  -5  -5   7    9.13    0.38 
  -5   5   7    8.50    0.39 
   5   5  -7    8.94    0.34 
  -4  -5   7    3.60    0.23 
  -4  -5   7    3.73    0.24 
   4  -5  -7    3.53    0.29 
   4   5  -7    3.19    0.21 
  -4   5   7    3.35    0.24 
  -3  -5   7   29.76    0.64 
   3  -5  -7   28.96    0.78 
  -3  -5   7   29.52    0.70 
   3   5  -7   31.01    0.66 
  -3   5   7   28.18    0.69 
  -2  -5   7   13.18    0.43 
   2  -5  -7   12.06    0.47 
  -2   5   7   12.12    0.40 
   2   5  -7   12.29    0.35 
   2   5  -7   12.02    0.39 
  -1  -5   7   29.65    0.70 
   1  -5  -7   29.48    0.78 
   1   5  -7   31.04    0.59 
  -1   5   7   30.06    0.57 
   1   5  -7   30.99    0.67 
  -1   5   7   30.20    0.66 
   0  -5   7   20.75    0.56 
   0  -5  -7   19.99    0.62 
   0   5   7   20.65    0.49 
   0   5   7   20.19    0.46 
   0   5  -7   20.19    0.53 
  -1  -5  -7   12.46    0.48 
   1  -5   7   12.57    0.43 
   1   5   7   13.00    0.35 
   1   5   7   13.40    0.38 
  -1   5  -7   13.59    0.43 
  -2  -5  -7  115.69    1.95 
   2  -5   7  112.51    1.83 
   2   5   7  115.33    1.73 
  -2   5  -7  110.46    1.77 
  -3  -5  -7  168.90    2.71 
   3  -5   7  175.01    2.62 
   3   5   7  175.88    2.50 
  -3   5  -7  170.41    2.53 
  -4  -5  -7    2.96    0.29 
   4  -5   7    2.91    0.24 
  -4   5  -7    2.81    0.23 
   4   5   7    2.70    0.20 
   5  -5   7   13.50    0.49 
  -5  -5  -7   12.37    0.52 
  -5   5  -7   11.27    0.44 
   5   5   7   11.94    0.45 
  -6  -5  -7   13.32    0.56 
   6  -5   7   13.34    0.51 
  -6   5  -7   15.22    0.53 
   6   5   7   13.05    0.49 
   7  -5   7    7.74    0.41 
  -7  -5  -7    7.39    0.43 
   7   5   7    8.01    0.41 
  -7   5  -7    7.78    0.39 
  -8  -5  -7   40.81    1.08 
   8  -5   7   39.39    0.99 
   8   5   7   41.13    1.02 
  -8   5  -7   40.34    1.00 
   9  -5   7    1.34    0.23 
  -9  -5  -7    0.95    0.22 
   9   5   7    1.04    0.21 
  -9   5  -7    1.58    0.25 
  10  -5   7    0.93    0.22 
 -10  -5  -7    1.12    0.24 
 -10   5  -7    0.96    0.22 
  10   5   7    1.17    0.24 
 -11  -5  -7    6.43    0.47 
 -11   5  -7    5.98    0.42 
  11   5   7    6.18    0.45 
 -12  -5  -7   27.75    1.00 
 -12   5  -7   28.77    0.95 
  12   5   7   28.24    0.96 
 -12  -6   7    0.07    0.20 
 -12   6   7   -0.06    0.17 
  11  -6  -7    5.66    0.47 
 -11  -6   7    4.77    0.46 
 -11   6   7    4.80    0.45 
  10  -6  -7    1.03    0.27 
 -10  -6   7    0.93    0.25 
 -10   6   7    1.05    0.24 
  -9  -6   7    7.08    0.45 
   9  -6  -7    7.03    0.46 
  -9   6   7    6.62    0.42 
   8  -6  -7    0.29    0.18 
  -8  -6   7    0.77    0.20 
  -8   6   7    0.69    0.19 
  -7  -6   7   13.27    0.54 
   7  -6  -7   13.85    0.58 
  -7   6   7   11.89    0.52 
  -6  -6   7    5.18    0.32 
  -6  -6   7    5.35    0.29 
   6  -6  -7    5.11    0.36 
  -6   6   7    5.36    0.34 
   6   6  -7    4.95    0.29 
  -5  -6   7    1.86    0.21 
   5  -6  -7    2.12    0.26 
  -5  -6   7    1.98    0.21 
   5   6  -7    1.66    0.19 
  -5   6   7    1.52    0.21 
  -4  -6   7   27.33    0.67 
   4  -6  -7   28.86    0.81 
  -4  -6   7   27.63    0.69 
   4   6  -7   27.54    0.67 
  -4   6   7   27.43    0.72 
  -3  -6   7   12.07    0.38 
  -3  -6   7   11.93    0.43 
   3  -6  -7   11.11    0.48 
   3   6  -7   11.58    0.41 
  -3   6   7   12.14    0.43 
  -2  -6   7   13.16    0.44 
   2  -6  -7   12.79    0.51 
  -2   6   7   12.06    0.41 
   2   6  -7   11.73    0.41 
   1  -6  -7   26.75    0.76 
  -1  -6   7   27.32    0.67 
  -1   6   7   26.25    0.55 
   1   6  -7   26.03    0.64 
  -1   6   7   26.01    0.62 
   0  -6  -7   20.02    0.64 
   0  -6   7   19.43    0.56 
   0   6   7   19.20    0.49 
   0   6   7   19.66    0.48 
   0   6  -7   19.59    0.55 
   1  -6   7   76.50    1.38 
  -1  -6  -7   74.60    1.48 
   1   6   7   79.33    1.23 
   1   6   7   75.83    1.26 
  -1   6  -7   77.01    1.34 
  -2  -6  -7   15.18    0.56 
   2  -6   7   14.81    0.50 
   2   6   7   15.34    0.45 
  -2   6  -7   14.47    0.48 
   3  -6   7    1.95    0.22 
  -3  -6  -7    2.14    0.26 
  -3   6  -7    2.53    0.24 
   3   6   7    2.37    0.22 
  -4  -6  -7   -0.12    0.10 
   4  -6   7    0.02    0.11 
   4   6   7   -0.05    0.07 
  -4   6  -7   -0.06    0.08 
   5  -6   7   18.08    0.61 
  -5  -6  -7   17.77    0.65 
   5   6   7   18.99    0.59 
  -5   6  -7   18.93    0.59 
  -6  -6  -7    1.92    0.27 
   6  -6   7    1.84    0.25 
   6   6   7    2.14    0.25 
  -6   6  -7    2.25    0.25 
   7  -6   7   32.09    0.88 
  -7  -6  -7   31.62    0.95 
  -7   6  -7   32.37    0.86 
   7   6   7   31.70    0.86 
   8  -6   7   11.17    0.51 
  -8  -6  -7   10.33    0.54 
   8   6   7   10.34    0.49 
  -8   6  -7   11.35    0.51 
   9  -6   7   12.71    0.56 
  -9  -6  -7   12.11    0.61 
  -9   6  -7   12.79    0.56 
   9   6   7   12.91    0.58 
 -10  -6  -7    8.34    0.52 
  10  -6   7    7.34    0.45 
 -10   6  -7    8.27    0.48 
  10   6   7    7.62    0.47 
 -11  -6  -7   12.12    0.64 
  11  -6   7   12.41    0.61 
 -11   6  -7   11.78    0.59 
  11   6   7   11.08    0.59 
 -12  -6  -7    1.47    0.33 
 -12   6  -7    1.70    0.31 
  12   6   7    1.38    0.29 
 -11  -7   7    4.37    0.47 
 -11   7   7    3.69    0.43 
 -10  -7   7    9.72    0.55 
  10  -7  -7   10.79    0.59 
 -10   7   7   10.00    0.55 
   9  -7  -7    6.19    0.46 
  -9  -7   7    6.38    0.44 
  -9   7   7    6.28    0.44 
  -8  -7   7    4.81    0.37 
   8  -7  -7    4.81    0.44 
  -8   7   7    4.85    0.38 
   7  -7  -7    1.67    0.27 
  -7  -7   7    1.99    0.26 
  -7   7   7    1.86    0.26 
   6  -7  -7    3.47    0.36 
  -6  -7   7    4.20    0.31 
  -6   7   7    4.18    0.32 
   6   7  -7    4.46    0.29 
   5  -7  -7    9.31    0.48 
  -5  -7   7   10.06    0.40 
  -5  -7   7    8.89    0.39 
  -5   7   7    9.48    0.43 
   5   7  -7    9.35    0.40 
   4  -7  -7    8.87    0.45 
  -4  -7   7    8.44    0.37 
  -4  -7   7    8.58    0.36 
   4   7  -7    8.83    0.38 
  -4   7   7    8.21    0.39 
  -3  -7   7   21.36    0.61 
   3  -7  -7   22.12    0.72 
   3   7  -7   22.89    0.63 
  -3   7   7   22.33    0.63 
   2  -7  -7    1.26    0.21 
  -2  -7   7    1.29    0.18 
   2   7  -7    1.36    0.19 
  -2   7   7    1.57    0.19 
  -1  -7   7    8.74    0.37 
   1  -7  -7    9.51    0.46 
   1   7  -7    9.12    0.38 
  -1   7   7    9.10    0.35 
  -1   7   7    8.65    0.31 
   0  -7   7  124.42    2.03 
   0  -7  -7  122.06    2.16 
   0   7   7  129.91    1.91 
   0   7   7  126.66    1.88 
   0   7  -7  124.11    2.00 
  -1  -7  -7   33.67    0.91 
   1  -7   7   33.68    0.82 
  -1   7  -7   33.97    0.80 
   1   7   7   33.36    0.73 
   2  -7   7    0.48    0.14 
  -2  -7  -7    0.58    0.17 
  -2   7  -7    0.75    0.15 
   2   7   7    0.53    0.12 
   3  -7   7  130.61    2.17 
  -3  -7  -7  133.20    2.30 
   3   7   7  132.10    2.07 
  -3   7  -7  129.32    2.11 
  -4  -7  -7   15.67    0.63 
   4  -7   7   16.23    0.58 
   4   7   7   17.57    0.56 
  -4   7  -7   17.72    0.58 
   5  -7   7    4.73    0.33 
  -5  -7  -7    3.86    0.38 
   5   7   7    4.92    0.31 
  -5   7  -7    5.02    0.32 
   6  -7   7    6.15    0.39 
  -6  -7  -7    6.22    0.42 
  -6   7  -7    5.47    0.35 
   6   7   7    5.91    0.36 
  -7  -7  -7    9.19    0.51 
   7  -7   7    7.78    0.44 
  -7   7  -7    7.91    0.42 
   7   7   7    8.13    0.43 
   8  -7   7    1.27    0.24 
  -8  -7  -7    1.61    0.29 
  -8   7  -7    1.27    0.23 
   8   7   7    1.31    0.23 
   9  -7   7    1.70    0.29 
  -9  -7  -7    2.50    0.34 
   9   7   7    1.98    0.29 
  -9   7  -7    2.59    0.32 
 -10  -7  -7   16.97    0.76 
  10  -7   7   15.49    0.68 
 -10   7  -7   16.54    0.68 
  10   7   7   16.60    0.70 
  11  -7   7    7.36    0.50 
 -11  -7  -7    7.15    0.53 
  11   7   7    8.04    0.53 
 -11   7  -7    7.73    0.49 
 -11  -8   7    4.22    0.47 
 -10  -8   7    9.79    0.57 
 -10   8   7    9.95    0.58 
  -9  -8   7    7.07    0.48 
  -9   8   7    6.96    0.48 
   8  -8  -7    8.44    0.52 
  -8  -8   7    8.00    0.47 
  -8   8   7    7.46    0.46 
  -7  -8   7    0.86    0.20 
   7  -8  -7    1.11    0.25 
  -7   8   7    0.52    0.18 
   6  -8  -7    1.19    0.25 
  -6  -8   7    1.46    0.22 
  -6   8   7    1.25    0.23 
   6   8  -7    1.46    0.22 
   5  -8  -7   23.32    0.78 
  -5   8   7   24.07    0.74 
   5   8  -7   22.48    0.68 
  -4  -8   7    7.13    0.36 
   4  -8  -7    7.14    0.43 
  -4   8   7    6.45    0.37 
   4   8  -7    6.85    0.37 
   3  -8  -7   15.67    0.63 
  -3  -8   7   15.49    0.53 
   3   8  -7   15.51    0.54 
  -3   8   7   16.42    0.54 
   2  -8  -7    1.29    0.24 
  -2  -8   7    1.37    0.20 
  -2   8   7    1.53    0.20 
   2   8  -7    1.56    0.21 
  -1  -8   7   56.20    1.15 
   1  -8  -7   55.09    1.28 
   1   8  -7   55.90    1.15 
  -1   8   7   57.64    1.09 
   0  -8   7   11.53    0.47 
   0  -8  -7   12.97    0.56 
   0   8  -7   12.26    0.47 
   0   8   7   12.41    0.42 
   1  -8   7    6.57    0.36 
  -1  -8  -7    6.35    0.40 
   1   8   7    6.35    0.31 
  -1   8  -7    6.57    0.36 
  -2  -8  -7    8.47    0.47 
   2  -8   7    8.30    0.41 
  -2   8  -7    7.61    0.39 
   2   8   7    8.07    0.36 
  -3  -8  -7   18.26    0.69 
   3  -8   7   17.29    0.61 
  -3   8  -7   17.85    0.60 
   3   8   7   17.38    0.56 
  -4  -8  -7   29.64    0.91 
   4  -8   7   30.72    0.85 
   4   8   7   30.75    0.80 
  -4   8  -7   29.93    0.81 
   5  -8   7    7.85    0.44 
  -5  -8  -7    7.52    0.47 
   5   8   7    8.76    0.42 
  -5   8  -7    8.42    0.42 
  -6  -8  -7    1.67    0.28 
   6  -8   7    1.93    0.27 
   6   8   7    1.79    0.24 
  -6   8  -7    2.11    0.26 
  -7  -8  -7    0.78    0.23 
   7  -8   7    1.16    0.24 
  -7   8  -7    1.33    0.23 
   7   8   7    1.31    0.22 
  -8  -8  -7   26.99    0.93 
   8  -8   7   26.00    0.86 
   8   8   7   26.33    0.85 
  -8   8  -7   25.33    0.82 
   9  -8   7   33.57    1.03 
  -9  -8  -7   32.94    1.08 
  -9   8  -7   33.94    0.98 
   9   8   7   32.57    1.00 
  10  -8   7    0.29    0.21 
 -10  -8  -7    0.12    0.21 
 -10   8  -7    0.20    0.18 
  10   8   7    0.18    0.18 
  11  -8   7    1.47    0.31 
 -11   8  -7    1.80    0.32 
 -10  -9   7    1.13    0.29 
 -10   9   7    0.82    0.27 
  -9  -9   7    5.48    0.44 
  -9   9   7    6.12    0.47 
  -8  -9   7    0.06    0.16 
  -8   9   7    0.21    0.19 
   7  -9  -7    4.21    0.43 
   7   9  -7    4.36    0.34 
  -7   9   7    3.80    0.38 
   6  -9  -7    2.04    0.31 
  -6   9   7    1.37    0.24 
   6   9  -7    1.37    0.23 
   5  -9  -7   24.45    0.84 
   5   9  -7   23.74    0.74 
  -5   9   7   25.63    0.78 
   4  -9  -7    1.01    0.24 
  -4   9   7    0.75    0.19 
   4   9  -7    1.07    0.21 
   3  -9  -7    4.50    0.38 
  -3  -9   7    4.08    0.30 
   3   9  -7    4.64    0.33 
  -3   9   7    4.56    0.31 
   2  -9  -7    0.93    0.21 
  -2  -9   7    0.92    0.18 
   2   9  -7    0.64    0.16 
  -2   9   7    1.04    0.18 
  -1  -9   7   13.73    0.52 
   1  -9  -7   14.08    0.61 
   1   9  -7   14.35    0.54 
   0  -9   7   52.18    1.15 
   0  -9  -7   53.82    1.28 
   0   9   7   53.17    1.05 
   0   9  -7   51.58    1.15 
  -1  -9  -7   21.86    0.77 
   1  -9   7   21.04    0.68 
   1   9   7   22.16    0.63 
  -1   9  -7   21.93    0.69 
  -2  -9  -7    2.83    0.34 
   2  -9   7    2.00    0.26 
  -2   9  -7    2.39    0.27 
   2   9   7    2.42    0.25 
   3  -9   7    8.14    0.43 
  -3  -9  -7    7.99    0.48 
   3   9   7    8.16    0.40 
  -3   9  -7    7.85    0.41 
   4  -9   7   30.43    0.88 
  -4  -9  -7   30.93    0.96 
  -4   9  -7   30.21    0.85 
   4   9   7   31.90    0.84 
   5  -9   7    0.11    0.15 
  -5  -9  -7   -0.01    0.15 
  -5   9  -7    0.00    0.10 
   5   9   7   -0.08    0.10 
  -6  -9  -7    0.59    0.22 
   6  -9   7    0.24    0.18 
  -6   9  -7    0.29    0.15 
   6   9   7    0.04    0.12 
   7  -9   7    0.83    0.22 
  -7  -9  -7    0.43    0.22 
   7   9   7    0.53    0.19 
  -7   9  -7    0.64    0.20 
   8  -9   7    3.27    0.39 
  -8  -9  -7    3.51    0.42 
   8   9   7    3.34    0.36 
  -8   9  -7    3.19    0.36 
  -9  -9  -7   12.96    0.70 
   9  -9   7   12.68    0.65 
   9   9   7   13.25    0.63 
  -9   9  -7   13.35    0.61 
  10  -9   7   17.82    0.79 
 -10  -9  -7   17.33    0.82 
 -10   9  -7   17.61    0.73 
  10   9   7   16.54    0.74 
  -9  10   7    0.30    0.22 
  -8  10   7    3.57    0.41 
   7  10  -7   18.29    0.70 
  -7  10   7   18.22    0.74 
  -6  10   7    9.00    0.51 
   6  10  -7    9.40    0.50 
   5 -10  -7   10.63    0.58 
   5  10  -7    9.61    0.49 
  -5  10   7   10.24    0.51 
   4 -10  -7    2.54    0.34 
   4  10  -7    2.18    0.28 
  -4  10   7    2.42    0.29 
  -3 -10   7    0.03    0.13 
   3 -10  -7   -0.03    0.16 
   3  10  -7    0.03    0.12 
  -3  10   7    0.00    0.13 
  -2 -10   7    0.84    0.19 
   2 -10  -7    1.05    0.25 
   2  10  -7    1.03    0.20 
   1 -10  -7   39.33    1.10 
  -1 -10   7   39.31    0.97 
   1  10  -7   39.90    1.01 
   0 -10   7   24.09    0.74 
   0 -10  -7   24.10    0.83 
   0  10   7   24.02    0.68 
   0  10  -7   24.02    0.76 
   1 -10   7   10.78    0.49 
  -1 -10  -7   10.40    0.54 
   1  10   7   11.05    0.46 
  -1  10  -7   10.03    0.48 
  -2 -10  -7    5.24    0.42 
   2 -10   7    5.01    0.36 
  -2  10  -7    5.30    0.35 
   2  10   7    5.28    0.33 
  -3 -10  -7    7.66    0.49 
   3 -10   7    7.76    0.45 
   3  10   7    9.08    0.44 
  -3  10  -7    8.56    0.45 
   4 -10   7   24.23    0.81 
  -4 -10  -7   22.69    0.85 
   4  10   7   23.39    0.75 
  -4  10  -7   23.74    0.77 
  -5 -10  -7    0.85    0.25 
   5 -10   7    0.86    0.22 
  -5  10  -7    0.91    0.20 
   5  10   7    0.90    0.21 
   6 -10   7    2.89    0.36 
  -6 -10  -7    3.31    0.40 
   6  10   7    3.18    0.34 
  -6  10  -7    3.29    0.35 
   7 -10   7   14.58    0.67 
  -7 -10  -7   13.73    0.70 
  -7  10  -7   12.96    0.60 
   7  10   7   13.43    0.62 
   8 -10   7    4.65    0.47 
  -8 -10  -7    4.28    0.47 
  -8  10  -7    4.84    0.40 
   8  10   7    4.62    0.45 
   9 -10   7    8.93    0.59 
  -9 -10  -7    8.80    0.61 
   9  10   7    9.48    0.57 
  -9  10  -7    9.18    0.54 
  -8  11   7   16.00    0.73 
  -7  11   7    8.13    0.52 
   7  11  -7    8.83    0.52 
   6  11  -7    1.88    0.29 
  -6  11   7    1.80    0.30 
  -5  11   7    5.62    0.41 
   5  11  -7    5.41    0.41 
  -4  11   7    4.17    0.38 
   4  11  -7    3.82    0.38 
   3 -11  -7    2.67    0.37 
   3  11  -7    2.25    0.30 
   2 -11  -7    0.25    0.20 
  -2 -11   7    0.42    0.16 
   2  11  -7    0.29    0.15 
  -1 -11   7    9.19    0.47 
   1 -11  -7   10.91    0.57 
   1  11  -7    9.47    0.49 
   0 -11   7   10.02    0.50 
   0 -11  -7    8.88    0.53 
   0  11  -7   10.23    0.52 
  -1 -11  -7   10.92    0.59 
   1 -11   7   10.01    0.49 
  -1  11  -7    8.68    0.48 
   1  11   7   11.39    0.49 
   2 -11   7    5.64    0.39 
  -2 -11  -7    6.20    0.47 
  -2  11  -7    5.39    0.39 
   2  11   7    6.25    0.38 
  -3 -11  -7    7.29    0.50 
   3 -11   7    6.75    0.43 
  -3  11  -7    7.01    0.43 
   3  11   7    7.25    0.43 
   4 -11   7    9.83    0.54 
  -4 -11  -7    9.12    0.57 
  -4  11  -7    9.20    0.50 
   4  11   7    9.43    0.49 
   5 -11   7    4.35    0.43 
  -5 -11  -7    4.64    0.46 
   5  11   7    4.56    0.42 
  -5  11  -7    4.87    0.39 
   6 -11   7    0.35    0.21 
  -6 -11  -7    0.22    0.23 
   6  11   7    0.07    0.15 
  -6  11  -7    0.41    0.19 
  -7 -11  -7    9.37    0.60 
   7 -11   7    9.57    0.57 
   7  11   7    9.42    0.54 
  -7  11  -7    9.87    0.54 
  -8 -11  -7    4.56    0.50 
   8 -11   7    3.38    0.44 
  -8  11  -7    4.05    0.42 
   8  11   7    3.61    0.41 
  -7  12   7    5.50    0.45 
   7  12  -7    5.33    0.43 
   6  12  -7    8.55    0.54 
  -6  12   7    9.01    0.54 
  -5  12   7    1.29    0.27 
   5  12  -7    0.64    0.23 
   4  12  -7    7.58    0.49 
   3  12  -7    5.25    0.41 
   2  12  -7    1.06    0.24 
   1 -12  -7    0.37    0.23 
  -1 -12   7    0.15    0.17 
   1  12  -7    0.33    0.19 
   0 -12   7    3.19    0.35 
   0 -12  -7    2.90    0.38 
   0  12  -7    2.48    0.33 
   1 -12   7    5.05    0.39 
  -1 -12  -7    5.28    0.44 
  -1  12  -7    6.02    0.42 
   1  12   7    5.50    0.37 
  -2 -12  -7    9.47    0.57 
   2 -12   7    9.40    0.51 
  -2  12  -7    8.55    0.51 
   2  12   7   10.36    0.51 
   3 -12   7    8.77    0.52 
  -3 -12  -7    7.76    0.54 
  -3  12  -7    9.24    0.51 
   3  12   7    8.13    0.47 
   4 -12   7    4.56    0.45 
  -4 -12  -7    5.60    0.53 
   4  12   7    4.01    0.39 
  -4  12  -7    4.76    0.39 
   5 -12   7    3.45    0.40 
  -5 -12  -7    4.29    0.48 
  -5  12  -7    4.07    0.42 
   5  12   7    3.50    0.38 
  -6 -12  -7    0.19    0.23 
   6 -12   7    0.01    0.18 
   6  12   7    0.40    0.21 
  -6  12  -7    0.25    0.18 
  -7 -12  -7   12.46    0.73 
   7  12   7   14.00    0.68 
  -7  12  -7   13.29    0.64 
   5  13  -7    0.34    0.22 
   4  13  -7    0.75    0.24 
   3  13  -7    3.18    0.40 
   2  13  -7    8.21    0.53 
   1  13  -7    1.53    0.29 
   0 -13   7    0.81    0.23 
   0  13  -7    0.69    0.22 
   1 -13   7    3.64    0.38 
  -1 -13  -7    3.73    0.45 
  -1  13  -7    3.77    0.41 
   2 -13   7   12.33    0.62 
  -2 -13  -7   12.15    0.68 
   2  13   7   12.53    0.59 
  -2  13  -7   13.69    0.66 
   3 -13   7    9.29    0.54 
  -3 -13  -7   10.30    0.63 
  -3  13  -7    9.50    0.55 
   3  13   7   10.24    0.55 
  -4 -13  -7    5.45    0.53 
   4 -13   7    5.10    0.49 
  -4  13  -7    5.74    0.45 
   4  13   7    6.01    0.43 
  -5 -13  -7   -0.05    0.23 
   5 -13   7    0.51    0.25 
   5  13   7    0.58    0.22 
  -5  13  -7    0.57    0.23 
   2  14  -7    7.43    0.53 
   1  14  -7    4.07    0.46 
   0  14  -7    1.70    0.32 
   1 -14   7    0.68    0.24 
  -1  14  -7    1.02    0.28 
   2 -14   7   14.65    0.69 
  13   0  -8   32.83    1.16 
  12   0  -8    3.65    0.44 
  11   0  -8    0.06    0.18 
 -11   0   8   -0.06    0.13 
  10   0  -8    1.60    0.28 
 -10   0   8    1.49    0.24 
  -9   0   8   13.74    0.54 
   9   0  -8   14.49    0.62 
  -8   0   8    0.14    0.11 
   8   0  -8    0.29    0.16 
  -7   0   8    0.67    0.15 
   7   0  -8    0.71    0.18 
  -6   0   8    9.17    0.39 
   6   0  -8    9.79    0.43 
  -5   0   8    0.87    0.14 
   5   0  -8    1.08    0.17 
   4   0  -8   79.26    1.42 
  -4   0   8   80.79    1.39 
  -3   0   8  104.94    1.70 
   3   0  -8  107.86    1.73 
   2   0  -8    5.50    0.16 
   2   0  -8    5.39    0.26 
  -2   0   8    5.59    0.26 
  -1   0   8   12.96    0.41 
   1   0  -8   13.85    0.31 
   1   0  -8   13.75    0.42 
   0   0  -8    1.01    0.13 
   0   0   8    0.69    0.11 
   0   0  -8    0.93    0.10 
   1   0   8   97.65    1.53 
  -1   0  -8   96.68    1.55 
  -1   0  -8   98.38    1.45 
  -2   0  -8   52.45    0.92 
   2   0   8   52.42    0.95 
  -2   0  -8   52.68    0.97 
  -3   0  -8   11.75    0.38 
  -3   0  -8   11.23    0.37 
   3   0   8   10.69    0.35 
  -4   0  -8   31.65    0.71 
   4   0   8   32.46    0.67 
  -4   0  -8   31.53    0.72 
  -5   0  -8    7.91    0.33 
  -5   0  -8    8.49    0.36 
   5   0   8    7.72    0.30 
  -6   0  -8    0.84    0.14 
  -6   0  -8    1.18    0.19 
  -7   0  -8   37.28    0.91 
  -7   0  -8   38.06    0.87 
  -8   0  -8    2.03    0.26 
  -9   0  -8    0.20    0.15 
 -10   0  -8    0.32    0.16 
  12   0   8    0.17    0.20 
  13  -1  -8    0.35    0.26 
  12  -1  -8    8.29    0.58 
 -12   1   8    8.67    0.51 
  12   1  -8    8.81    0.58 
  11  -1  -8   19.67    0.82 
 -11   1   8   21.26    0.75 
  11   1  -8   20.03    0.82 
  10  -1  -8   24.70    0.88 
 -10  -1   8   24.29    0.75 
 -10   1   8   24.82    0.78 
  10   1  -8   25.88    0.88 
   9  -1  -8   11.57    0.56 
  -9  -1   8   11.46    0.48 
  -9   1   8   11.40    0.49 
   9   1  -8   11.33    0.55 
   8  -1  -8    4.55    0.35 
  -8  -1   8    5.20    0.32 
  -8   1   8    4.86    0.32 
   8   1  -8    5.02    0.35 
  -7  -1   8   34.31    0.85 
   7  -1  -8   37.72    0.95 
   7   1  -8   36.13    0.93 
  -7   1   8   37.08    0.88 
  -6  -1   8    2.32    0.23 
   6  -1  -8    1.94    0.24 
   6   1  -8    2.33    0.25 
  -6   1   8    2.75    0.22 
  -5  -1   8   19.72    0.56 
   5  -1  -8   18.85    0.59 
  -5   1   8   18.97    0.56 
   5   1  -8   19.05    0.58 
   4  -1  -8   69.48    1.30 
  -4  -1   8   71.54    1.27 
  -4   1   8   69.08    1.25 
   4   1  -8   70.49    1.28 
   3  -1  -8  172.82    2.58 
  -3  -1   8  169.49    2.52 
  -3   1   8  172.95    2.52 
   3   1  -8  168.59    2.52 
   2  -1  -8   59.95    1.12 
  -2  -1   8   61.39    1.11 
  -2   1   8   57.75    1.07 
   2   1  -8   62.30    0.91 
   2   1  -8   59.34    1.08 
   1  -1  -8   -0.01    0.04 
  -1  -1   8    0.03    0.06 
   1  -1  -8    0.18    0.08 
   1   1  -8    0.01    0.05 
   1   1  -8    0.06    0.06 
  -1   1   8    0.12    0.07 
   0  -1  -8    3.34    0.16 
   0  -1  -8    4.53    0.24 
   0  -1   8    3.05    0.20 
   0   1   8    2.93    0.19 
   0   1  -8    3.37    0.19 
   0   1  -8    3.17    0.16 
  -1  -1  -8   16.01    0.39 
  -1  -1  -8   15.72    0.46 
   1  -1   8   15.75    0.45 
   1   1   8   16.25    0.43 
  -1   1  -8   15.44    0.42 
  -1   1  -8   16.17    0.41 
   2  -1   8   76.48    1.28 
  -2  -1  -8   76.41    1.22 
  -2  -1  -8   78.91    1.34 
  -2   1  -8   75.74    1.23 
  -2   1  -8   75.99    1.25 
   2   1   8   76.86    1.24 
  -3  -1  -8   13.57    0.41 
  -3  -1  -8   14.67    0.46 
   3  -1   8   13.43    0.41 
  -3   1  -8   14.92    0.43 
  -3   1  -8   14.26    0.40 
   3   1   8   14.74    0.40 
  -4  -1  -8   25.44    0.64 
  -4  -1  -8   25.34    0.63 
   4  -1   8   25.18    0.60 
  -4   1  -8   24.70    0.62 
  -4   1  -8   25.57    0.58 
   4   1   8   24.93    0.56 
  -5  -1  -8   20.96    0.59 
   5  -1   8   20.38    0.54 
  -5  -1  -8   19.94    0.57 
  -5   1  -8   20.59    0.52 
  -5   1  -8   20.45    0.58 
  -6  -1  -8  133.35    2.14 
  -6  -1  -8  131.71    2.14 
   6  -1   8  136.05    2.05 
  -6   1  -8  134.01    2.14 
  -7  -1  -8    7.07    0.36 
  -7  -1  -8    7.03    0.38 
  -7   1  -8    6.35    0.36 
  -8  -1  -8    8.75    0.44 
  -8  -1  -8    8.79    0.42 
  -8   1  -8    9.47    0.45 
  -9  -1  -8    5.99    0.37 
  -9  -1  -8    5.87    0.38 
  -9   1  -8    5.44    0.38 
 -10   1  -8    0.32    0.17 
  10   1   8    0.29    0.17 
 -11   1  -8   10.00    0.55 
  11   1   8    9.63    0.55 
 -12   1  -8   22.37    0.84 
  12   1   8   20.73    0.82 
  12  -2  -8    9.54    0.60 
  12   2  -8    9.60    0.60 
 -12   2   8   10.23    0.55 
  11  -2  -8   18.16    0.78 
  11   2  -8   17.97    0.77 
 -11   2   8   19.52    0.73 
 -10  -2   8    9.90    0.46 
  10  -2  -8    8.51    0.51 
 -10   2   8    9.83    0.49 
  10   2  -8    9.27    0.53 
   9  -2  -8    1.13    0.23 
  -9  -2   8    1.60    0.22 
  -9   2   8    1.54    0.24 
   9   2  -8    1.50    0.26 
  -8  -2   8    2.66    0.26 
   8  -2  -8    2.56    0.30 
   8   2  -8    2.75    0.30 
  -8   2   8    2.68    0.28 
   7  -2  -8   10.92    0.49 
  -7  -2   8    9.24    0.40 
  -7   2   8    9.05    0.42 
   7   2  -8    9.70    0.45 
  -6  -2   8    2.55    0.24 
   6  -2  -8    2.49    0.27 
   6   2  -8    2.33    0.25 
  -6   2   8    2.10    0.23 
   5  -2  -8   17.93    0.59 
  -5  -2   8   17.55    0.53 
   5   2  -8   18.15    0.56 
  -5   2   8   18.57    0.55 
   4  -2  -8   16.45    0.53 
  -4  -2   8   16.92    0.50 
  -4   2   8   15.55    0.49 
   4   2  -8   16.25    0.50 
   3  -2  -8   25.28    0.66 
  -3  -2   8   24.28    0.62 
   3   2  -8   25.60    0.49 
  -3   2   8   24.82    0.62 
   3   2  -8   24.70    0.61 
  -2  -2   8   11.37    0.39 
   2  -2  -8   11.37    0.42 
   2   2  -8   12.02    0.31 
   2   2  -8   12.07    0.38 
  -2   2   8   11.80    0.39 
  -1  -2   8   22.24    0.57 
   1  -2  -8   22.67    0.60 
   1   2  -8   22.80    0.53 
  -1   2   8   22.17    0.54 
   1   2  -8   22.08    0.47 
  -1   2   8   22.48    0.42 
   0  -2   8    0.72    0.12 
   0  -2  -8    0.89    0.14 
   0   2  -8    0.83    0.11 
   0   2   8    0.78    0.12 
   0   2   8    0.94    0.10 
   0   2  -8    0.73    0.10 
   1  -2   8   25.26    0.61 
  -1  -2  -8   24.99    0.64 
  -1  -2  -8   26.02    0.54 
   1   2   8   24.77    0.55 
  -1   2  -8   25.07    0.55 
  -1   2  -8   24.91    0.53 
  -2  -2  -8    7.20    0.28 
   2  -2   8    8.07    0.32 
  -2  -2  -8    7.72    0.34 
  -2   2  -8    7.52    0.30 
   2   2   8    7.61    0.28 
  -2   2  -8    7.42    0.26 
  -3  -2  -8   26.91    0.63 
  -3  -2  -8   27.36    0.69 
   3  -2   8   26.55    0.64 
  -3   2  -8   29.06    0.57 
   3   2   8   27.22    0.57 
  -3   2  -8   26.59    0.63 
  -4  -2  -8   42.15    0.93 
  -4  -2  -8   42.67    0.89 
   4  -2   8   44.23    0.88 
   4   2   8   43.75    0.78 
  -4   2  -8   43.20    0.89 
  -5  -2  -8   14.66    0.51 
  -5  -2  -8   15.01    0.50 
   5  -2   8   15.29    0.48 
  -5   2  -8   16.22    0.51 
  -6  -2  -8   15.43    0.53 
   6  -2   8   14.84    0.48 
  -6   2  -8   14.99    0.52 
   7  -2   8   49.97    1.02 
  -7  -2  -8   48.78    1.10 
  -8  -2  -8    9.42    0.46 
   8   2   8    9.82    0.47 
  -8   2  -8   10.01    0.46 
  -9  -2  -8    5.37    0.37 
   9   2   8    5.22    0.37 
  -9   2  -8    5.87    0.39 
 -10  -2  -8    2.86    0.33 
  10   2   8    2.95    0.33 
 -10   2  -8    2.12    0.28 
 -11   2  -8    8.02    0.50 
  11   2   8    7.08    0.46 
 -12   2  -8    2.85    0.37 
  12   2   8    3.01    0.38 
  12  -3  -8    1.25    0.30 
 -12   3   8    1.24    0.27 
  12   3  -8    1.35    0.32 
  11  -3  -8    4.10    0.44 
  11   3  -8    3.67    0.42 
 -11   3   8    3.86    0.39 
  10  -3  -8   16.13    0.70 
 -10   3   8   16.33    0.65 
  10   3  -8   15.12    0.67 
   9  -3  -8   25.06    0.84 
  -9  -3   8   24.13    0.71 
  -9   3   8   24.62    0.78 
   9   3  -8   25.01    0.83 
   8  -3  -8    3.67    0.36 
  -8  -3   8    3.43    0.27 
  -8   3   8    3.75    0.29 
   8   3  -8    2.98    0.32 
  -7  -3   8    4.88    0.30 
  -7   3   8    4.33    0.30 
   7   3  -8    4.60    0.32 
  -6  -3   8   56.77    1.12 
  -6   3   8   56.20    1.16 
   6   3  -8   56.68    1.18 
  -5  -3   8   32.76    0.77 
   5  -3  -8   31.83    0.84 
   5   3  -8   32.58    0.79 
  -5   3   8   33.11    0.79 
  -4  -3   8    1.65    0.19 
   4  -3  -8    1.30    0.19 
  -4   3   8    1.43    0.18 
   4   3  -8    1.54    0.18 
  -3  -3   8    0.32    0.10 
   3  -3  -8    0.46    0.12 
   3   3  -8    0.68    0.11 
  -3   3   8    0.51    0.11 
   3   3  -8    0.53    0.09 
   2  -3  -8   22.57    0.63 
  -2  -3   8   21.40    0.57 
   2   3  -8   20.79    0.52 
   2   3  -8   20.87    0.48 
  -2   3   8   20.93    0.55 
   1  -3  -8    5.10    0.28 
  -1  -3   8    4.84    0.26 
   1   3  -8    5.16    0.22 
  -1   3   8    5.59    0.26 
   1   3  -8    5.01    0.22 
  -1   3   8    5.46    0.18 
   0  -3   8   39.10    0.82 
   0  -3  -8   37.87    0.87 
   0   3   8   39.05    0.76 
   0   3  -8   38.34    0.74 
   0   3   8   39.42    0.68 
   0   3  -8   38.31    0.71 
  -1  -3  -8   48.78    1.01 
   1  -3   8   48.22    0.95 
  -1   3  -8   47.00    0.88 
  -1   3  -8   47.87    0.81 
   1   3   8   46.96    0.83 
   1   3   8   47.62    0.86 
  -2  -3  -8   31.00    0.77 
   2  -3   8   31.26    0.71 
   2   3   8   30.50    0.64 
  -2   3  -8   30.50    0.67 
   2   3   8   30.49    0.61 
  -3  -3  -8   67.99    1.32 
   3  -3   8   70.09    1.25 
   3   3   8   68.49    1.19 
  -3   3  -8   68.88    1.21 
   3   3   8   70.10    1.10 
   4  -3   8   82.28    1.43 
  -4  -3  -8   82.74    1.52 
   4   3   8   82.41    1.41 
  -4   3  -8   81.67    1.41 
  -5  -3  -8   84.59    1.58 
   5  -3   8   87.03    1.50 
  -5   3  -8   86.66    1.51 
   5   3   8   84.53    1.49 
   6  -3   8   25.37    0.69 
  -6  -3  -8   26.42    0.76 
   6   3   8   27.92    0.74 
  -6   3  -8   27.28    0.74 
   7  -3   8    3.91    0.29 
  -7  -3  -8    3.34    0.32 
   7   3   8    3.55    0.28 
  -7   3  -8    3.29    0.31 
  -8  -3  -8   15.79    0.61 
   8  -3   8   15.31    0.55 
   8   3   8   15.74    0.59 
  -8   3  -8   15.32    0.58 
  -9  -3  -8    0.92    0.21 
   9   3   8    0.44    0.16 
  -9   3  -8    0.53    0.17 
 -10  -3  -8    8.59    0.49 
 -10   3  -8    7.29    0.45 
  10   3   8    8.55    0.48 
 -11  -3  -8    5.93    0.43 
  11   3   8    5.41    0.43 
 -11   3  -8    5.22    0.42 
  12   3   8    0.78    0.23 
 -12   3  -8    0.49    0.23 
  12  -4  -8    6.12    0.52 
  12   4  -8    5.60    0.54 
 -12   4   8    7.56    0.51 
  11  -4  -8   19.03    0.81 
 -11   4   8   19.50    0.75 
  10  -4  -8   43.19    1.21 
 -10   4   8   43.80    1.15 
   9  -4  -8    4.29    0.42 
  -9   4   8    4.56    0.35 
   8  -4  -8   11.66    0.56 
  -8  -4   8   11.11    0.51 
  -8  -4   8   13.11    0.49 
  -8   4   8   12.32    0.53 
   7  -4  -8    8.71    0.47 
  -7  -4   8    8.66    0.39 
  -7   4   8    8.62    0.43 
  -6  -4   8    4.54    0.28 
   6  -4  -8    4.42    0.34 
  -6   4   8    4.71    0.31 
  -5  -4   8   48.28    1.00 
   5  -4  -8   49.36    1.12 
  -5   4   8   47.58    1.03 
   5   4  -8   48.88    1.02 
  -4  -4   8   12.37    0.44 
   4  -4  -8   12.71    0.51 
   4   4  -8   13.68    0.44 
  -4   4   8   12.73    0.45 
   4   4  -8   14.04    0.39 
   3  -4  -8    0.65    0.15 
  -3  -4   8    1.10    0.16 
   3   4  -8    1.26    0.15 
   3   4  -8    1.29    0.14 
  -3   4   8    1.26    0.16 
   2  -4  -8   21.14    0.64 
  -2  -4   8   21.29    0.58 
   2   4  -8   20.69    0.51 
   2   4  -8   21.63    0.52 
  -2   4   8   20.90    0.55 
  -1  -4   8   83.17    1.45 
   1  -4  -8   86.04    1.55 
   1   4  -8   86.64    1.33 
  -1   4   8   83.34    1.38 
  -1   4   8   84.48    1.22 
   1   4  -8   84.44    1.35 
   0  -4   8    3.87    0.24 
   0  -4  -8    3.97    0.27 
   0   4  -8    3.63    0.21 
   0   4   8    3.69    0.18 
   0   4   8    3.68    0.21 
   1  -4   8   15.60    0.49 
  -1  -4  -8   16.31    0.55 
   1   4   8   16.26    0.42 
   1   4   8   16.54    0.42 
  -1   4  -8   16.38    0.46 
   2  -4   8   39.03    0.86 
  -2  -4  -8   40.29    0.94 
   2   4   8   40.42    0.79 
   2   4   8   39.70    0.73 
  -2   4  -8   40.03    0.83 
  -3  -4  -8    2.14    0.24 
   3  -4   8    2.39    0.23 
  -3   4  -8    1.82    0.19 
   3   4   8    1.97    0.19 
   4  -4   8   83.34    1.49 
  -4  -4  -8   84.81    1.59 
   4   4   8   84.24    1.44 
  -4   4  -8   84.24    1.47 
  -5  -4  -8   13.72    0.54 
   5  -4   8   13.60    0.49 
  -5   4  -8   13.37    0.48 
   5   4   8   14.80    0.49 
   6  -4   8   27.92    0.76 
  -6  -4  -8   28.24    0.82 
  -6   4  -8   29.29    0.77 
   6   4   8   29.22    0.77 
  -7  -4  -8    0.23    0.15 
   7  -4   8   -0.09    0.11 
  -7   4  -8    0.12    0.11 
   7   4   8   -0.04    0.10 
  -8  -4  -8    8.24    0.46 
   8  -4   8    8.02    0.42 
   8   4   8    8.85    0.45 
  -8   4  -8    8.45    0.44 
   9  -4   8   20.02    0.67 
  -9  -4  -8   19.55    0.73 
   9   4   8   19.46    0.70 
  -9   4  -8   18.62    0.69 
 -10  -4  -8    2.13    0.32 
 -10   4  -8    2.07    0.29 
  10   4   8    2.51    0.32 
 -11  -4  -8    1.30    0.28 
  11   4   8    1.03    0.24 
 -11   4  -8    1.88    0.30 
 -12  -4  -8    0.13    0.21 
  12   4   8    0.13    0.20 
 -12   4  -8   -0.10    0.16 
  12  -5  -8    0.87    0.30 
 -12   5   8    1.45    0.31 
 -11  -5   8    5.13    0.43 
  11  -5  -8    6.00    0.47 
 -11   5   8    5.48    0.43 
 -10  -5   8    6.43    0.44 
  10  -5  -8    6.09    0.46 
 -10   5   8    6.63    0.44 
  -9  -5   8   16.13    0.66 
   9  -5  -8   15.78    0.69 
  -9   5   8   15.99    0.65 
   8  -5  -8    5.29    0.41 
  -8  -5   8    4.96    0.36 
  -8   5   8    4.61    0.34 
  -7  -5   8    4.41    0.32 
   7  -5  -8    3.90    0.37 
  -7  -5   8    4.33    0.29 
  -7   5   8    4.33    0.32 
   6  -5  -8   33.68    0.93 
  -6  -5   8   32.78    0.83 
  -6  -5   8   32.57    0.80 
  -6   5   8   31.89    0.85 
  -5  -5   8   36.46    0.85 
  -5  -5   8   37.26    0.84 
   5  -5  -8   35.18    0.95 
  -5   5   8   36.28    0.88 
   4  -5  -8    8.07    0.43 
  -4  -5   8    9.33    0.38 
  -4   5   8    8.42    0.37 
   4   5  -8    8.40    0.33 
   3  -5  -8   37.80    0.95 
  -3  -5   8   37.69    0.85 
  -3   5   8   37.46    0.84 
   3   5  -8   38.84    0.80 
   3   5  -8   38.16    0.78 
  -2  -5   8   11.07    0.41 
   2  -5  -8   11.09    0.47 
  -2   5   8   11.55    0.41 
   2   5  -8   11.81    0.36 
   2   5  -8   11.79    0.39 
  -1  -5   8   13.63    0.46 
   1  -5  -8   13.86    0.53 
   1   5  -8   13.53    0.42 
  -1   5   8   13.27    0.42 
   0  -5  -8  107.55    1.89 
   0  -5   8  107.34    1.77 
   0   5  -8  106.01    1.68 
   0   5   8  104.84    1.64 
   0   5   8  109.09    1.58 
  -1  -5  -8  116.34    1.99 
   1  -5   8  112.90    1.87 
  -1   5  -8  113.31    1.80 
   1   5   8  115.76    1.71 
   1   5   8  114.02    1.71 
   2  -5   8    4.14    0.28 
  -2  -5  -8    4.59    0.31 
  -2   5  -8    3.88    0.24 
   2   5   8    4.51    0.24 
  -3  -5  -8  166.15    2.70 
   3  -5   8  167.98    2.58 
  -3   5  -8  170.90    2.52 
   3   5   8  168.85    2.47 
   4  -5   8   47.83    1.04 
  -4  -5  -8   48.30    1.13 
   4   5   8   47.74    0.99 
  -5  -5  -8   16.50    0.62 
   5  -5   8   17.35    0.58 
  -5   5  -8   16.31    0.55 
   5   5   8   16.90    0.55 
   6  -5   8   16.83    0.58 
  -6  -5  -8   16.72    0.64 
  -6   5  -8   17.38    0.59 
   6   5   8   17.52    0.58 
   7  -5   8    1.26    0.21 
  -7  -5  -8    1.13    0.22 
  -7   5  -8    1.25    0.20 
   7   5   8    1.83    0.25 
   8  -5   8   13.02    0.55 
  -8  -5  -8   12.50    0.58 
   8   5   8   13.85    0.57 
  -8   5  -8   12.97    0.55 
  -9  -5  -8    0.25    0.18 
   9  -5   8    0.03    0.16 
   9   5   8    0.16    0.14 
  -9   5  -8   -0.11    0.11 
 -10  -5  -8   10.24    0.57 
 -10   5  -8    9.48    0.52 
  10   5   8    9.54    0.53 
 -11  -5  -8    3.76    0.42 
 -11   5  -8    3.75    0.40 
  11   5   8    3.44    0.39 
 -12  -5  -8    1.69    0.33 
 -12   5  -8    1.86    0.32 
  11  -6  -8   21.65    0.88 
 -11  -6   8   21.38    0.85 
 -11   6   8   21.13    0.84 
  10  -6  -8   18.03    0.77 
 -10  -6   8   18.23    0.75 
 -10   6   8   18.51    0.75 
   9  -6  -8    0.72    0.23 
  -9  -6   8    0.79    0.21 
  -9   6   8    0.63    0.21 
   8  -6  -8    7.83    0.48 
  -8  -6   8    7.53    0.43 
  -8   6   8    8.06    0.46 
  -7  -6   8    4.77    0.34 
   7  -6  -8    4.90    0.39 
  -7   6   8    4.72    0.34 
  -6  -6   8    8.97    0.40 
  -6  -6   8    9.46    0.43 
   6  -6  -8    9.58    0.49 
  -6   6   8    9.12    0.44 
   5  -6  -8   38.61    1.01 
  -5  -6   8   37.20    0.86 
  -5  -6   8   36.84    0.87 
   5   6  -8   37.54    0.83 
  -5   6   8   37.23    0.92 
  -4  -6   8   13.11    0.44 
  -4  -6   8   13.37    0.48 
   4  -6  -8   13.15    0.55 
   4   6  -8   13.04    0.44 
  -4   6   8   13.69    0.49 
  -3  -6   8   20.38    0.60 
   3  -6  -8   20.12    0.68 
  -3   6   8   19.01    0.58 
   3   6  -8   20.12    0.56 
  -2  -6   8   65.46    1.25 
   2  -6  -8   64.78    1.37 
   2   6  -8   65.69    1.19 
  -2   6   8   63.60    1.20 
  -1  -6   8   28.83    0.74 
   1  -6  -8   28.80    0.82 
   1   6  -8   28.64    0.69 
  -1   6   8   29.56    0.68 
   0  -6   8    9.41    0.40 
   0  -6  -8   10.09    0.48 
   0   6   8    9.48    0.35 
   0   6  -8    9.77    0.39 
   0   6   8   10.19    0.33 
   1  -6   8   69.25    1.31 
  -1  -6  -8   68.42    1.42 
   1   6   8   70.39    1.19 
  -1   6  -8   67.65    1.26 
   2  -6   8    7.51    0.37 
  -2  -6  -8    7.33    0.41 
  -2   6  -8    8.05    0.36 
   2   6   8    8.10    0.33 
   3  -6   8   27.65    0.75 
  -3  -6  -8   26.90    0.82 
  -3   6  -8   27.92    0.72 
   3   6   8   27.33    0.68 
  -4  -6  -8    2.11    0.28 
   4  -6   8    2.31    0.26 
  -4   6  -8    2.12    0.23 
   4   6   8    1.98    0.22 
  -5  -6  -8    7.02    0.43 
   5  -6   8    6.88    0.39 
   5   6   8    7.41    0.37 
  -5   6  -8    7.18    0.38 
   6  -6   8   13.37    0.55 
  -6  -6  -8   14.15    0.61 
  -6   6  -8   14.82    0.56 
   6   6   8   14.38    0.54 
  -7  -6  -8   26.63    0.86 
   7  -6   8   25.30    0.78 
  -7   6  -8   24.06    0.75 
   7   6   8   25.57    0.77 
   8  -6   8    4.86    0.37 
  -8  -6  -8    4.40    0.42 
   8   6   8    3.62    0.36 
  -8   6  -8    4.12    0.32 
  -9  -6  -8   20.97    0.81 
   9  -6   8   21.49    0.76 
  -9   6  -8   20.20    0.74 
   9   6   8   21.65    0.76 
  10  -6   8    1.03    0.25 
 -10  -6  -8    0.60    0.23 
 -10   6  -8    0.27    0.17 
  10   6   8    0.41    0.20 
 -11  -6  -8    3.98    0.45 
 -11   6  -8    4.23    0.43 
  11   6   8    3.91    0.43 
 -11  -7   8    4.72    0.49 
 -11   7   8    4.19    0.46 
  10  -7  -8    3.83    0.44 
 -10  -7   8    4.20    0.44 
 -10   7   8    3.59    0.40 
  -9  -7   8   11.08    0.57 
   9  -7  -8   11.99    0.63 
  -9   7   8   11.34    0.58 
   8  -7  -8   15.49    0.69 
  -8  -7   8   15.00    0.62 
  -8   7   8   15.69    0.65 
  -7  -7   8    1.33    0.23 
   7  -7  -8    1.59    0.28 
  -7   7   8    1.64    0.26 
  -6  -7   8    9.61    0.43 
  -6  -7   8    9.93    0.43 
   6  -7  -8    8.17    0.49 
  -6   7   8    9.11    0.46 
  -5  -7   8   12.74    0.48 
   5  -7  -8   12.55    0.58 
  -5  -7   8   13.25    0.49 
  -5   7   8   12.59    0.52 
   5   7  -8   13.23    0.48 
  -4  -7   8    5.61    0.33 
   4  -7  -8    5.07    0.38 
  -4   7   8    5.21    0.32 
   4   7  -8    5.45    0.30 
  -3  -7   8   11.75    0.47 
   3  -7  -8   10.98    0.53 
  -3   7   8   11.61    0.45 
   3   7  -8   11.73    0.44 
   2  -7  -8    3.07    0.33 
  -2  -7   8    2.48    0.26 
   2   7  -8    3.25    0.25 
  -2   7   8    3.65    0.25 
   1  -7  -8   35.77    0.96 
  -1  -7   8   34.90    0.85 
   1   7  -8   34.78    0.82 
  -1   7   8   35.28    0.78 
   0  -7  -8   44.70    1.10 
   0  -7   8   43.97    0.99 
   0   7   8   45.50    0.87 
   0   7  -8   43.83    0.97 
  -1  -7  -8    8.31    0.45 
   1  -7   8    9.21    0.42 
   1   7   8    8.38    0.34 
  -1   7  -8    8.44    0.38 
  -2  -7  -8   48.31    1.17 
   2  -7   8   48.37    1.07 
  -2   7  -8   46.28    1.02 
   2   7   8   47.76    0.97 
   3  -7   8   38.64    0.94 
  -3  -7  -8   35.93    1.00 
  -3   7  -8   36.55    0.88 
   3   7   8   37.13    0.85 
  -4  -7  -8   25.50    0.82 
   4  -7   8   25.96    0.76 
   4   7   8   23.25    0.68 
  -4   7  -8   23.08    0.70 
   5  -7   8    0.96    0.20 
  -5  -7  -8    1.34    0.24 
  -5   7  -8    0.94    0.18 
   5   7   8    1.11    0.19 
   6  -7   8   21.56    0.72 
  -6  -7  -8   20.56    0.76 
   6   7   8   19.94    0.67 
  -6   7  -8   20.58    0.68 
  -7  -7  -8    3.69    0.39 
   7  -7   8    3.33    0.35 
   7   7   8    3.50    0.34 
  -7   7  -8    2.76    0.30 
   8  -7   8    5.88    0.42 
  -8  -7  -8    5.83    0.44 
  -8   7  -8    6.72    0.42 
   8   7   8    6.92    0.42 
   9  -7   8    1.66    0.29 
  -9  -7  -8    1.70    0.31 
  -9   7  -8    1.80    0.29 
   9   7   8    1.69    0.28 
  10  -7   8    7.77    0.51 
 -10  -7  -8    7.38    0.54 
 -10   7  -8    7.08    0.47 
  10   7   8    8.01    0.50 
 -11  -7  -8    4.14    0.47 
  11  -7   8    4.35    0.45 
 -11   7  -8    4.36    0.44 
  11   7   8    3.72    0.43 
 -10  -8   8    0.62    0.23 
 -10   8   8    0.45    0.23 
   9  -8  -8    2.25    0.37 
  -9  -8   8    2.20    0.32 
  -9   8   8    2.14    0.33 
   8  -8  -8    1.02    0.26 
  -8  -8   8    1.01    0.23 
  -8   8   8    1.14    0.24 
   7  -8  -8   24.97    0.89 
  -7  -8   8   24.88    0.79 
  -7   8   8   25.73    0.84 
   6  -8  -8    7.53    0.48 
   6   8  -8    8.27    0.41 
  -6   8   8    6.93    0.42 
  -5  -8   8    4.28    0.30 
   5  -8  -8    3.09    0.35 
   5   8  -8    3.69    0.28 
  -5   8   8    3.49    0.33 
  -4  -8   8    0.12    0.12 
   4  -8  -8    0.41    0.17 
  -4   8   8    0.26    0.14 
   4   8  -8    0.20    0.13 
  -3  -8   8   59.30    1.22 
   3  -8  -8   57.00    1.36 
  -3   8   8   58.88    1.20 
   3   8  -8   58.01    1.20 
   2  -8  -8   24.35    0.81 
  -2  -8   8   24.05    0.70 
   2   8  -8   23.18    0.68 
  -2   8   8   24.18    0.67 
  -1  -8   8    6.92    0.37 
   1  -8  -8    7.34    0.45 
  -1   8   8    7.56    0.34 
   1   8  -8    7.13    0.37 
   0  -8  -8   12.17    0.56 
   0  -8   8   12.01    0.49 
   0   8  -8   11.80    0.47 
   1  -8   8    8.29    0.41 
  -1  -8  -8    7.38    0.45 
   1   8   8    8.18    0.35 
  -1   8  -8    7.73    0.39 
  -2  -8  -8    5.62    0.40 
   2  -8   8    6.29    0.38 
   2   8   8    5.52    0.31 
  -2   8  -8    6.45    0.36 
  -3  -8  -8   23.90    0.81 
   3  -8   8   21.83    0.71 
  -3   8  -8   23.69    0.71 
   3   8   8   23.55    0.67 
   4  -8   8   13.38    0.56 
  -4  -8  -8   13.35    0.62 
   4   8   8   13.50    0.52 
  -4   8  -8   13.65    0.54 
  -5  -8  -8    1.70    0.28 
   5  -8   8    1.40    0.25 
  -5   8  -8    1.23    0.21 
   5   8   8    1.55    0.23 
   6  -8   8    2.44    0.30 
  -6  -8  -8    2.81    0.35 
  -6   8  -8    2.48    0.29 
   6   8   8    2.50    0.29 
   7  -8   8   22.63    0.80 
  -7  -8  -8   23.32    0.86 
   7   8   8   22.81    0.77 
  -7   8  -8   21.51    0.74 
  -8  -8  -8    8.50    0.55 
   8  -8   8    9.54    0.53 
   8   8   8    9.35    0.51 
  -8   8  -8    9.38    0.50 
  -9  -8  -8    4.54    0.48 
   9  -8   8    4.62    0.45 
   9   8   8    5.10    0.46 
  -9   8  -8    3.92    0.40 
  10  -8   8    7.25    0.51 
 -10  -8  -8    7.01    0.55 
  10   8   8    7.01    0.49 
 -10   8  -8    7.11    0.49 
 -10  -9   8    0.84    0.26 
  -9   9   8   -0.07    0.18 
   8  -9  -8   30.74    1.03 
  -8   9   8   28.14    0.95 
   7  -9  -8   11.53    0.63 
  -7   9   8   10.66    0.56 
   6  -9  -8    3.74    0.41 
  -6   9   8    3.64    0.37 
   6   9  -8    4.13    0.33 
   5  -9  -8    6.65    0.48 
  -5   9   8    6.95    0.42 
   5   9  -8    7.71    0.42 
   4  -9  -8   32.57    1.01 
  -4  -9   8   33.13    0.87 
   4   9  -8   32.66    0.87 
  -4   9   8   33.58    0.90 
   3  -9  -8    4.58    0.39 
  -3  -9   8    4.32    0.32 
   3   9  -8    3.95    0.31 
  -3   9   8    4.78    0.33 
   2  -9  -8    2.40    0.32 
  -2  -9   8    2.45    0.28 
  -2   9   8    2.54    0.26 
   2   9  -8    2.33    0.27 
   1  -9  -8   17.05    0.70 
  -1  -9   8   17.73    0.62 
   1   9  -8   16.96    0.60 
   0  -9   8    4.10    0.31 
   0  -9  -8    3.02    0.36 
   0   9  -8    3.81    0.30 
  -1  -9  -8    5.52    0.42 
   1  -9   8    4.86    0.35 
   1   9   8    4.81    0.30 
  -1   9  -8    5.05    0.33 
  -2  -9  -8   16.41    0.68 
   2  -9   8   17.23    0.63 
   2   9   8   17.20    0.57 
  -2   9  -8   17.78    0.63 
   3  -9   8   13.67    0.57 
  -3  -9  -8   14.41    0.65 
   3   9   8   13.95    0.53 
  -3   9  -8   14.18    0.56 
   4  -9   8    7.09    0.44 
  -4  -9  -8    6.53    0.46 
   4   9   8    6.56    0.39 
  -4   9  -8    6.02    0.38 
   5  -9   8    3.11    0.35 
  -5  -9  -8    3.21    0.38 
   5   9   8    2.80    0.30 
  -5   9  -8    2.92    0.31 
   6  -9   8   14.20    0.62 
  -6  -9  -8   12.88    0.65 
   6   9   8   14.21    0.60 
  -6   9  -8   13.74    0.59 
   7  -9   8    1.41    0.28 
  -7  -9  -8    1.41    0.31 
  -7   9  -8    1.36    0.25 
   7   9   8    1.39    0.25 
   8  -9   8    0.88    0.25 
  -8  -9  -8    1.02    0.28 
   8   9   8    0.99    0.23 
  -8   9  -8    1.25    0.25 
  -9  -9  -8    5.84    0.55 
   9  -9   8    5.77    0.46 
   9   9   8    5.92    0.46 
  -9   9  -8    5.60    0.42 
  -8  10   8   -0.07    0.18 
  -7  10   8    7.31    0.50 
   6 -10  -8    9.14    0.58 
  -6  10   8   10.00    0.54 
   6  10  -8    9.24    0.50 
   5 -10  -8    9.69    0.58 
   5  10  -8    9.32    0.49 
  -5  10   8    8.55    0.49 
   4 -10  -8    8.08    0.52 
  -4  10   8    8.17    0.45 
   4  10  -8    8.60    0.46 
  -3 -10   8   25.48    0.77 
   3 -10  -8   27.64    0.94 
   3  10  -8   24.67    0.79 
  -3  10   8   25.90    0.78 
   2 -10  -8    8.39    0.51 
  -2 -10   8    8.72    0.45 
   2  10  -8    7.51    0.42 
  -1 -10   8    9.77    0.47 
   1 -10  -8   10.05    0.56 
   1  10  -8    9.40    0.47 
   0 -10  -8    5.96    0.44 
   0 -10   8    5.77    0.38 
   0  10  -8    5.28    0.36 
   1 -10   8    4.29    0.34 
  -1 -10  -8    4.58    0.45 
   1  10   8    3.74    0.29 
  -1  10  -8    4.32    0.33 
   2 -10   8    2.49    0.30 
  -2 -10  -8    2.42    0.34 
   2  10   8    2.85    0.30 
  -2  10  -8    2.94    0.32 
   3 -10   8    8.07    0.47 
  -3 -10  -8    8.41    0.53 
   3  10   8    8.01    0.42 
  -3  10  -8    8.10    0.45 
   4 -10   8   10.67    0.55 
  -4 -10  -8   11.20    0.62 
  -4  10  -8   11.93    0.54 
   4  10   8   11.22    0.51 
   5 -10   8   17.26    0.71 
  -5 -10  -8   16.87    0.76 
   5  10   8   15.90    0.64 
  -5  10  -8   17.01    0.66 
   6 -10   8    9.62    0.56 
  -6 -10  -8   10.63    0.62 
   6  10   8   10.07    0.52 
  -6  10  -8    9.25    0.51 
  -7 -10  -8    0.21    0.23 
   7 -10   8    0.28    0.20 
   7  10   8    0.46    0.19 
  -7  10  -8    0.98    0.24 
  -8 -10  -8    1.66    0.34 
   8 -10   8    1.25    0.30 
   8  10   8    1.57    0.29 
  -8  10  -8    1.24    0.25 
  -9  10  -8    3.22    0.38 
  -8  11   8    2.92    0.39 
  -7  11   8   11.97    0.64 
   6  11  -8   12.40    0.60 
  -6  11   8   12.84    0.63 
  -5  11   8    1.01    0.24 
   5  11  -8    1.64    0.27 
   4 -11  -8   12.45    0.67 
  -4  11   8   12.01    0.56 
   4  11  -8   12.59    0.59 
   3 -11  -8    2.31    0.35 
   3  11  -8    2.50    0.31 
  -2 -11   8    5.53    0.38 
   2 -11  -8    4.72    0.47 
   2  11  -8    5.46    0.40 
  -1 -11   8    2.72    0.31 
   1 -11  -8    2.20    0.34 
   1  11  -8    1.89    0.27 
   0 -11  -8    4.50    0.47 
   0 -11   8    3.88    0.37 
   0  11  -8    4.12    0.38 
  -1 -11  -8    2.78    0.37 
   1 -11   8    3.22    0.35 
  -1  11  -8    3.28    0.34 
  -2 -11  -8    3.17    0.39 
   2 -11   8    3.04    0.35 
   2  11   8    2.89    0.31 
  -2  11  -8    3.13    0.34 
  -3 -11  -8    3.41    0.42 
   3 -11   8    3.24    0.36 
   3  11   8    3.65    0.35 
  -3  11  -8    3.61    0.38 
  -4 -11  -8    7.77    0.54 
   4 -11   8    8.39    0.50 
  -4  11  -8    7.10    0.45 
   4  11   8    8.32    0.46 
   5 -11   8    6.19    0.46 
  -5 -11  -8    6.67    0.51 
   5  11   8    6.91    0.45 
  -5  11  -8    6.06    0.44 
   6 -11   8   20.32    0.82 
  -6 -11  -8   20.61    0.89 
   6  11   8   20.40    0.77 
  -6  11  -8   20.66    0.78 
   7 -11   8    2.32    0.37 
  -7 -11  -8    2.63    0.39 
  -7  11  -8    3.17    0.38 
   7  11   8    2.82    0.35 
  -6  12   8   -0.11    0.18 
   6  12  -8   -0.18    0.16 
   5  12  -8    6.91    0.48 
  -5  12   8    6.29    0.46 
   4  12  -8    6.48    0.46 
   3  12  -8    3.78    0.39 
   2 -12  -8    2.73    0.39 
   2  12  -8    2.27    0.32 
  -1 -12   8   17.13    0.68 
   1 -12  -8   16.73    0.78 
   1  12  -8   17.53    0.71 
   0 -12   8   12.03    0.58 
   0 -12  -8   11.24    0.63 
   0  12  -8   12.05    0.59 
   1 -12   8    1.98    0.30 
  -1 -12  -8    2.20    0.35 
  -1  12  -8    2.12    0.30 
  -2 -12  -8    2.64    0.39 
   2 -12   8    2.02    0.31 
  -2  12  -8    2.09    0.31 
  -3 -12  -8    1.60    0.34 
   3 -12   8    1.77    0.31 
  -3  12  -8    1.50    0.27 
   3  12   8    1.45    0.26 
   4 -12   8    1.73    0.30 
  -4 -12  -8    2.24    0.37 
   4  12   8    2.01    0.30 
  -4  12  -8    1.76    0.29 
   5 -12   8   16.46    0.76 
  -5 -12  -8   18.38    0.84 
  -5  12  -8   18.69    0.76 
   5  12   8   19.03    0.75 
  -6 -12  -8    3.86    0.49 
   6 -12   8    2.81    0.40 
  -6  12  -8    3.44    0.40 
   6  12   8    3.03    0.38 
   4  13  -8    1.30    0.30 
   3  13  -8    7.16    0.51 
   2  13  -8    3.84    0.42 
   1  13  -8    1.79    0.31 
   0 -13   8    5.77    0.44 
   0 -13  -8    6.42    0.59 
   0  13  -8    5.74    0.45 
   1 -13   8    1.88    0.32 
  -1 -13  -8    2.01    0.38 
  -1  13  -8    1.47    0.29 
  -2 -13  -8    0.36    0.25 
   2 -13   8    0.40    0.21 
  -2  13  -8    0.05    0.18 
  -3 -13  -8    1.31    0.33 
   3 -13   8    0.98    0.25 
   3  13   8    1.04    0.25 
  -3  13  -8    1.17    0.28 
  -4 -13  -8   15.57    0.79 
   4 -13   8   16.52    0.75 
  -4  13  -8   15.17    0.71 
   4  13   8   17.13    0.73 
  12   0  -9    1.56    0.34 
  11   0  -9   19.07    0.82 
 -11   0   9   20.21    0.73 
  10   0  -9    3.27    0.39 
 -10   0   9    2.77    0.31 
   9   0  -9    4.68    0.39 
  -9   0   9    4.16    0.32 
   8   0  -9    0.24    0.14 
  -8   0   9   -0.04    0.11 
  -7   0   9    4.08    0.29 
   7   0  -9    4.12    0.32 
  -6   0   9    1.65    0.21 
   6   0  -9    1.84    0.24 
   5   0  -9   42.27    0.97 
  -5   0   9   41.93    0.93 
   4   0  -9  128.55    2.10 
  -4   0   9  128.99    2.05 
  -3   0   9   39.09    0.85 
   3   0  -9   38.81    0.86 
  -2   0   9    4.96    0.27 
   2   0  -9    5.08    0.27 
  -1   0   9   36.59    0.79 
   1   0  -9   35.67    0.79 
   1   0  -9   37.03    0.63 
   0   0   9   81.57    1.39 
   0   0  -9   81.78    1.41 
   0   0  -9   84.45    1.25 
  -1   0  -9    0.08    0.06 
   1   0   9    0.01    0.07 
  -1   0  -9    0.02    0.06 
  -2   0  -9    0.12    0.07 
   2   0   9    0.11    0.08 
  -2   0  -9    0.05    0.06 
  -3   0  -9    2.73    0.19 
  -3   0  -9    3.38    0.22 
   3   0   9    2.49    0.19 
  -4   0  -9    2.58    0.23 
   4   0   9    2.70    0.20 
  -4   0  -9    2.92    0.21 
   5   0   9    0.33    0.11 
  -5   0  -9    0.28    0.10 
  -5   0  -9    0.24    0.10 
  -6   0  -9   85.60    1.56 
  -6   0  -9   86.95    1.52 
  -7   0  -9   32.84    0.87 
  -8   0  -9    4.12    0.32 
  -9   0  -9   27.41    0.85 
 -10   0  -9   21.47    0.78 
  12   0   9    1.24    0.29 
  12  -1  -9    3.03    0.43 
  12   1  -9    3.29    0.44 
 -12   1   9    3.48    0.38 
 -11  -1   9    0.66    0.20 
  11  -1  -9    0.38    0.22 
 -11   1   9    0.40    0.18 
  11   1  -9    0.26    0.22 
  10  -1  -9    3.21    0.38 
 -10  -1   9    2.78    0.31 
 -10   1   9    3.49    0.35 
  10   1  -9    3.30    0.38 
  -9  -1   9    2.83    0.30 
   9  -1  -9    3.06    0.36 
   9   1  -9    3.59    0.38 
  -9   1   9    3.87    0.32 
   8  -1  -9    3.09    0.33 
  -8  -1   9    2.70    0.28 
  -8   1   9    3.17    0.27 
   8   1  -9    3.60    0.36 
   7  -1  -9    9.33    0.46 
  -7  -1   9    8.81    0.41 
   7   1  -9    8.78    0.45 
  -7   1   9    9.36    0.43 
  -6  -1   9    5.46    0.32 
   6  -1  -9    5.48    0.35 
   6   1  -9    6.40    0.36 
  -6   1   9    6.32    0.34 
  -5  -1   9   20.70    0.60 
   5  -1  -9   21.01    0.65 
  -5   1   9   19.87    0.60 
   5   1  -9   20.71    0.63 
   4  -1  -9   12.70    0.47 
  -4  -1   9   12.08    0.44 
   4   1  -9   12.27    0.45 
  -4   1   9   12.75    0.46 
   3  -1  -9   24.56    0.67 
  -3   1   9   24.81    0.64 
   3   1  -9   25.04    0.64 
   2  -1  -9    4.25    0.26 
  -2  -1   9    4.59    0.27 
   2   1  -9    4.84    0.26 
  -2   1   9    4.15    0.24 
   1  -1  -9   45.21    0.73 
  -1  -1   9   44.97    0.92 
   1  -1  -9   44.90    0.95 
  -1   1   9   44.63    0.90 
   1   1  -9   46.51    0.77 
   1   1  -9   44.12    0.89 
   0  -1   9   43.01    0.88 
   0  -1  -9   42.42    0.91 
   0  -1  -9   42.59    0.74 
   0   1   9   42.02    0.85 
   0   1  -9   43.79    0.77 
   0   1  -9   43.27    0.85 
   1  -1   9   13.79    0.44 
  -1  -1  -9   13.95    0.38 
  -1  -1  -9   13.91    0.45 
  -1   1  -9   12.33    0.37 
   1   1   9   12.62    0.41 
  -1   1  -9   13.38    0.41 
  -2  -1  -9   16.30    0.50 
  -2  -1  -9   16.56    0.45 
   2  -1   9   16.88    0.49 
  -2   1  -9   16.44    0.46 
   2   1   9   17.96    0.48 
  -2   1  -9   16.92    0.46 
  -3  -1  -9    1.58    0.19 
  -3  -1  -9    1.64    0.18 
   3  -1   9    1.62    0.18 
   3   1   9    1.66    0.17 
  -3   1  -9    1.66    0.18 
  -3   1  -9    2.12    0.17 
  -4  -1  -9    0.29    0.11 
  -4  -1  -9    0.08    0.08 
   4  -1   9   -0.09    0.08 
  -4   1  -9    0.34    0.10 
   4   1   9    0.12    0.09 
  -4   1  -9    0.31    0.11 
  -5  -1  -9    2.22    0.24 
   5  -1   9    2.73    0.22 
  -5  -1  -9    2.29    0.23 
  -5   1  -9    2.63    0.25 
   6  -1   9   10.37    0.40 
  -6  -1  -9   11.00    0.44 
  -6  -1  -9   11.20    0.46 
  -6   1  -9    9.61    0.43 
  -7  -1  -9   19.48    0.65 
  -7  -1  -9   19.61    0.62 
  -7   1  -9   18.58    0.63 
  -8  -1  -9    4.85    0.35 
  -8  -1  -9    4.18    0.32 
  -8   1  -9    5.33    0.35 
  -9  -1  -9    2.79    0.32 
  -9   1  -9    3.25    0.34 
  10   1   9    2.47    0.33 
 -10   1  -9    2.27    0.32 
 -11   1  -9   16.55    0.72 
  11   1   9   16.87    0.72 
  12   1   9    2.00    0.32 
 -12   1  -9    1.76    0.30 
  12  -2  -9    3.51    0.45 
 -12   2   9    4.10    0.43 
  12   2  -9    3.74    0.46 
  11  -2  -9    3.46    0.43 
  11   2  -9    3.64    0.44 
 -11   2   9    2.90    0.34 
 -10  -2   9    2.66    0.30 
  10  -2  -9    2.16    0.33 
 -10   2   9    2.51    0.31 
  10   2  -9    3.16    0.38 
  -9  -2   9    2.77    0.30 
   9  -2  -9    2.93    0.35 
  -9   2   9    2.80    0.30 
   9   2  -9    2.71    0.33 
   8  -2  -9   18.43    0.69 
  -8  -2   9   17.81    0.60 
   8   2  -9   16.46    0.65 
  -8   2   9   16.46    0.61 
  -7  -2   9    4.54    0.31 
   7  -2  -9    4.71    0.35 
   7   2  -9    4.58    0.33 
  -7   2   9    4.52    0.31 
   6  -2  -9   25.66    0.77 
  -6  -2   9   26.56    0.72 
   6   2  -9   25.59    0.75 
  -6   2   9   26.46    0.73 
  -5  -2   9   20.13    0.60 
   5  -2  -9   20.22    0.65 
   5   2  -9   20.64    0.62 
  -5   2   9   20.30    0.60 
  -4  -2   9   56.76    1.13 
   4  -2  -9   57.66    1.20 
   4   2  -9   58.83    1.14 
  -4   2   9   58.60    1.14 
   3  -2  -9   61.47    1.22 
  -3   2   9   60.36    1.15 
   3   2  -9   60.81    1.14 
   2  -2  -9   61.12    1.21 
   2   2  -9   59.63    1.11 
  -2   2   9   61.39    1.14 
   2   2  -9   63.75    0.99 
   1  -2  -9   29.66    0.74 
  -1  -2   9   28.93    0.71 
   1   2  -9   30.22    0.59 
  -1   2   9   28.97    0.67 
   1   2  -9   29.12    0.65 
   0  -2   9   20.46    0.56 
   0  -2  -9   18.97    0.57 
   0   2   9   20.19    0.52 
   0   2  -9   19.60    0.49 
   0   2  -9   19.71    0.47 
  -1  -2  -9    3.53    0.24 
  -1  -2  -9    3.02    0.18 
   1  -2   9    2.63    0.21 
  -1   2  -9    3.97    0.20 
  -1   2  -9    3.21    0.20 
   1   2   9    3.23    0.20 
   2  -2   9   22.05    0.59 
  -2  -2  -9   21.92    0.53 
  -2  -2  -9   22.05    0.62 
   2   2   9   21.75    0.53 
  -2   2  -9   20.87    0.50 
  -2   2  -9   21.54    0.55 
  -3  -2  -9   21.42    0.56 
   3  -2   9   20.36    0.57 
  -3  -2  -9   20.07    0.60 
   3   2   9   21.82    0.51 
  -3   2  -9   20.46    0.56 
   4  -2   9   37.34    0.83 
  -4  -2  -9   37.97    0.83 
  -4  -2  -9   36.63    0.87 
  -4   2  -9   36.41    0.82 
  -5  -2  -9   15.43    0.54 
  -5  -2  -9   15.86    0.53 
   5  -2   9   15.55    0.50 
  -5   2  -9   15.94    0.52 
   6  -2   9   61.44    1.17 
  -6  -2  -9   58.32    1.23 
  -6  -2  -9   57.41    1.20 
  -6   2  -9   58.71    1.21 
   7  -2   9   21.31    0.61 
  -7  -2  -9   19.66    0.65 
  -7   2  -9   18.71    0.64 
  -8  -2  -9   12.05    0.52 
   8   2   9   11.76    0.52 
  -8   2  -9   10.88    0.50 
  -9  -2  -9   13.62    0.58 
  -9   2  -9   13.57    0.59 
   9   2   9   13.71    0.60 
  10   2   9   12.71    0.60 
 -10   2  -9   13.85    0.62 
  11   2   9    5.74    0.45 
 -11   2  -9    6.04    0.45 
 -12   2  -9    1.71    0.32 
  12   2   9    1.16    0.28 
  12  -3  -9    1.05    0.30 
 -12   3   9    1.69    0.31 
  12   3  -9    0.81    0.30 
  11  -3  -9    6.80    0.53 
 -11   3   9    8.00    0.50 
  11   3  -9    7.61    0.53 
  10  -3  -9    2.57    0.36 
 -10   3   9    3.03    0.35 
  10   3  -9    3.17    0.38 
   9  -3  -9    3.13    0.36 
  -9  -3   9    2.98    0.30 
   9   3  -9    2.77    0.34 
  -9   3   9    3.16    0.32 
   8  -3  -9    6.63    0.43 
  -8  -3   9    7.09    0.38 
  -8   3   9    7.17    0.40 
   8   3  -9    6.81    0.42 
   7  -3  -9   41.34    1.08 
  -7  -3   9   41.36    0.96 
   7   3  -9   39.93    1.02 
  -7   3   9   40.91    1.00 
   6  -3  -9    3.62    0.34 
  -6  -3   9    3.11    0.26 
  -6   3   9    2.78    0.27 
   6   3  -9    3.17    0.27 
   5  -3  -9    6.95    0.39 
  -5  -3   9    6.85    0.35 
  -5   3   9    7.45    0.36 
   5   3  -9    7.59    0.36 
   4  -3  -9   14.92    0.55 
  -4  -3   9   14.91    0.50 
  -4   3   9   15.97    0.51 
   4   3  -9   15.91    0.50 
  -3  -3   9   55.65    1.12 
   3  -3  -9   56.55    1.19 
   3   3  -9   57.69    1.08 
  -3   3   9   57.37    1.10 
   2  -3  -9    5.93    0.33 
  -2  -3   9    5.63    0.30 
   2   3  -9    5.94    0.25 
  -2   3   9    5.79    0.29 
   2   3  -9    5.89    0.27 
   1  -3  -9   15.59    0.54 
  -1  -3   9   16.28    0.50 
   1   3  -9   16.69    0.45 
  -1   3   9   15.32    0.46 
   1   3  -9   16.04    0.42 
   0  -3  -9   23.27    0.67 
   0  -3   9   22.18    0.62 
   0   3   9   23.57    0.49 
   0   3   9   22.83    0.57 
   0   3  -9   23.57    0.55 
   0   3  -9   23.69    0.53 
  -1  -3  -9   20.40    0.62 
   1  -3   9   21.25    0.58 
  -1   3  -9   19.63    0.51 
   1   3   9   20.80    0.48 
   1   3   9   19.50    0.50 
   2  -3   9    8.88    0.37 
  -2  -3  -9    9.10    0.41 
   2   3   9    9.36    0.32 
   2   3   9    9.15    0.33 
  -2   3  -9    9.32    0.35 
   3  -3   9   70.30    1.28 
  -3  -3  -9   68.75    1.35 
   3   3   9   68.23    1.21 
  -3   3  -9   68.19    1.24 
   4  -3   9   12.37    0.45 
  -4  -3  -9   13.65    0.51 
   4   3   9   13.71    0.46 
  -4   3  -9   14.13    0.48 
   5  -3   9    9.45    0.41 
  -5  -3  -9    9.68    0.44 
  -5   3  -9    9.36    0.41 
   5   3   9    9.47    0.41 
   6  -3   9    3.96    0.29 
  -6  -3  -9    3.72    0.30 
  -6   3  -9    4.19    0.29 
   6   3   9    4.39    0.30 
   7  -3   9   11.65    0.47 
  -7  -3  -9   11.75    0.52 
   7   3   9   12.40    0.51 
  -7   3  -9   11.41    0.49 
  -8  -3  -9    0.59    0.18 
   8  -3   9    0.74    0.18 
   8   3   9    0.60    0.18 
  -8   3  -9    0.69    0.19 
  -9  -3  -9    7.37    0.45 
  -9   3  -9    8.75    0.48 
   9   3   9    8.46    0.46 
 -10  -3  -9    0.73    0.21 
 -10   3  -9    0.57    0.19 
  10   3   9    0.82    0.21 
 -11  -3  -9    5.55    0.44 
 -11   3  -9    5.51    0.42 
  11   3   9    5.21    0.43 
 -12   3  -9    4.40    0.47 
  12   3   9    4.10    0.45 
  12  -4  -9    5.18    0.55 
 -12   4   9    5.04    0.48 
  12   4  -9    4.58    0.50 
  11  -4  -9    7.15    0.53 
 -11   4   9    7.33    0.49 
  11   4  -9    6.55    0.49 
  10  -4  -9    3.60    0.41 
 -10   4   9    4.49    0.37 
  10   4  -9    4.50    0.45 
   9  -4  -9    1.05    0.25 
  -9   4   9    1.22    0.23 
   9   4  -9    0.97    0.23 
   8  -4  -9    2.15    0.30 
  -8  -4   9    2.62    0.27 
   8   4  -9    2.26    0.29 
  -8   4   9    2.37    0.29 
  -7  -4   9   12.31    0.49 
   7  -4  -9   12.62    0.57 
  -7   4   9   12.35    0.52 
   7   4  -9   12.35    0.53 
  -6  -4   9   39.45    0.93 
   6  -4  -9   40.89    1.05 
   6   4  -9   40.43    0.97 
  -6   4   9   40.44    0.97 
   5  -4  -9   31.55    0.88 
  -5  -4   9   29.95    0.78 
   5   4  -9   31.12    0.78 
  -4  -4   9   20.22    0.60 
   4  -4  -9   20.79    0.68 
  -4   4   9   19.23    0.59 
   4   4  -9   19.20    0.56 
  -3  -4   9    5.82    0.31 
   3  -4  -9    6.11    0.37 
   3   4  -9    5.58    0.25 
   3   4  -9    5.05    0.27 
  -3   4   9    5.31    0.29 
   2  -4  -9   43.00    1.03 
  -2   4   9   44.72    0.92 
   2   4  -9   45.73    0.88 
   2   4  -9   45.42    0.85 
   1  -4  -9    7.35    0.38 
  -1  -4   9    7.10    0.34 
  -1   4   9    6.92    0.30 
   1   4  -9    7.00    0.29 
   1   4  -9    7.05    0.27 
   0  -4  -9    2.00    0.24 
   0  -4   9    1.85    0.21 
   0   4   9    1.81    0.18 
   0   4  -9    1.97    0.19 
   0   4   9    1.90    0.14 
   1  -4   9   25.74    0.68 
  -1  -4  -9   25.92    0.74 
  -1   4  -9   26.08    0.63 
   1   4   9   26.86    0.60 
   1   4   9   26.19    0.58 
   2  -4   9   75.36    1.38 
  -2  -4  -9   74.89    1.47 
   2   4   9   76.75    1.23 
  -2   4  -9   75.42    1.32 
   2   4   9   75.60    1.27 
   3  -4   9   11.73    0.45 
  -3  -4  -9   11.69    0.49 
   3   4   9   11.04    0.39 
  -3   4  -9   10.83    0.41 
  -4  -4  -9   75.79    1.49 
   4  -4   9   75.85    1.41 
  -4   4  -9   74.83    1.37 
   4   4   9   72.74    1.33 
  -5  -4  -9    5.89    0.38 
   5  -4   9    5.99    0.34 
  -5   4  -9    6.25    0.34 
   5   4   9    6.18    0.34 
  -6  -4  -9    7.24    0.42 
   6  -4   9    7.49    0.39 
  -6   4  -9    6.63    0.37 
   6   4   9    6.96    0.38 
   7  -4   9   23.77    0.71 
  -7  -4  -9   23.46    0.77 
   7   4   9   22.78    0.71 
  -7   4  -9   21.30    0.70 
  -8  -4  -9   23.80    0.81 
   8  -4   9   24.51    0.75 
  -8   4  -9   24.01    0.77 
   8   4   9   23.70    0.76 
  -9  -4  -9    2.95    0.35 
   9   4   9    3.44    0.35 
  -9   4  -9    3.52    0.35 
 -10  -4  -9    6.94    0.48 
 -10   4  -9    6.94    0.45 
  10   4   9    7.24    0.46 
 -11  -4  -9   17.04    0.74 
 -11   4  -9   16.96    0.72 
  11   4   9   16.63    0.73 
 -12  -4  -9    7.22    0.52 
 -12   4  -9    7.10    0.51 
  11  -5  -9    5.65    0.54 
 -11   5   9    4.81    0.46 
  11   5  -9    6.47    0.51 
  10  -5  -9    0.85    0.26 
 -10   5   9    0.80    0.24 
  10   5  -9    1.09    0.25 
   9  -5  -9    7.06    0.50 
   9   5  -9    7.54    0.47 
  -9   5   9    7.46    0.46 
  -8  -5   9    0.46    0.15 
   8  -5  -9    0.61    0.21 
  -8   5   9    0.27    0.15 
   8   5  -9    0.62    0.19 
   7  -5  -9    1.25    0.24 
  -7  -5   9    0.92    0.18 
  -7   5   9    0.80    0.18 
   7   5  -9    1.16    0.22 
  -6  -5   9    3.71    0.29 
   6  -5  -9    4.52    0.36 
   6   5  -9    4.44    0.32 
  -6   5   9    4.30    0.32 
   5  -5  -9   25.04    0.80 
  -5  -5   9   25.33    0.71 
  -5   5   9   25.30    0.73 
   5   5  -9   26.73    0.71 
   4  -5  -9    6.63    0.40 
  -4  -5   9    6.81    0.35 
   4   5  -9    7.35    0.34 
  -4   5   9    7.63    0.37 
   3  -5  -9   33.72    0.92 
  -3  -5   9   33.95    0.83 
   3   5  -9   35.11    0.76 
   3   5  -9   34.27    0.74 
  -3   5   9   33.82    0.81 
  -2  -5   9   19.89    0.60 
   2  -5  -9   20.03    0.68 
  -2   5   9   21.38    0.58 
   2   5  -9   20.63    0.55 
  -1  -5   9   29.76    0.76 
   1  -5  -9   29.81    0.84 
  -1   5   9   30.97    0.71 
   1   5  -9   30.15    0.69 
   0  -5   9    6.75    0.35 
   0  -5  -9    7.21    0.39 
   0   5  -9    7.15    0.32 
   0   5   9    6.84    0.30 
  -1  -5  -9   26.50    0.77 
   1  -5   9   24.60    0.68 
   1   5   9   26.22    0.59 
   1   5   9   25.15    0.58 
  -1   5  -9   24.83    0.64 
   2  -5   9   20.59    0.62 
  -2  -5  -9   19.77    0.67 
  -2   5  -9   21.04    0.59 
   2   5   9   21.38    0.55 
   3  -5   9   65.30    1.27 
  -3  -5  -9   63.17    1.36 
   3   5   9   61.38    1.16 
  -3   5  -9   62.41    1.21 
  -4  -5  -9    7.86    0.44 
   4  -5   9    7.80    0.39 
   4   5   9    8.28    0.37 
  -4   5  -9    9.28    0.41 
   5  -5   9   19.60    0.64 
  -5  -5  -9   20.87    0.72 
  -5   5  -9   20.57    0.64 
   5   5   9   20.03    0.62 
   6  -5   9   10.59    0.48 
  -6  -5  -9   10.71    0.53 
  -6   5  -9   12.06    0.50 
   6   5   9   11.09    0.48 
  -7  -5  -9    9.90    0.51 
   7  -5   9   10.43    0.48 
   7   5   9   10.00    0.47 
  -7   5  -9    9.36    0.46 
  -8  -5  -9   10.66    0.55 
   8  -5   9   11.32    0.52 
   8   5   9   10.89    0.52 
  -8   5  -9   10.31    0.51 
  -9  -5  -9    0.65    0.21 
   9  -5   9    0.65    0.21 
   9   5   9    0.73    0.21 
  -9   5  -9    0.93    0.22 
 -10  -5  -9    3.46    0.40 
 -10   5  -9    3.73    0.39 
  10   5   9    3.75    0.40 
 -11  -5  -9    0.48    0.23 
 -11   5  -9    0.81    0.25 
  11   5   9    0.58    0.23 
  11  -6  -9    0.94    0.29 
 -11   6   9    1.32    0.29 
  10  -6  -9   11.83    0.66 
 -10   6   9   11.22    0.60 
   9  -6  -9    1.37    0.29 
  -9   6   9    1.15    0.24 
   8  -6  -9    2.75    0.37 
  -8   6   9    3.28    0.35 
  -7  -6   9    9.10    0.43 
   7  -6  -9    8.34    0.51 
  -7   6   9    8.95    0.46 
  -6  -6   9   17.26    0.58 
   6  -6  -9   16.98    0.69 
  -6   6   9   17.31    0.63 
  -5  -6   9   29.85    0.79 
   5  -6  -9   27.42    0.87 
   5   6  -9   29.95    0.77 
  -5   6   9   29.12    0.81 
  -4  -6   9    0.32    0.14 
   4  -6  -9   -0.03    0.14 
   4   6  -9    0.02    0.10 
  -4   6   9    0.28    0.13 
   4   6  -9   -0.07    0.07 
   3  -6  -9    8.03    0.46 
  -3  -6   9    8.43    0.40 
   3   6  -9    8.75    0.36 
  -3   6   9    8.85    0.39 
   2  -6  -9    6.59    0.42 
  -2  -6   9    6.27    0.35 
  -2   6   9    6.51    0.33 
   2   6  -9    6.46    0.32 
  -1  -6   9   15.46    0.55 
   1  -6  -9   16.06    0.63 
   1   6  -9   16.30    0.51 
  -1   6   9   17.37    0.51 
   0  -6  -9    5.19    0.37 
   0  -6   9    4.85    0.31 
   0   6  -9    5.52    0.30 
   0   6   9    5.70    0.28 
  -1  -6  -9    0.69    0.19 
   1  -6   9    1.08    0.19 
  -1   6  -9    0.80    0.15 
   1   6   9    0.79    0.13 
  -2  -6  -9   28.06    0.85 
   2  -6   9   28.32    0.78 
  -2   6  -9   28.94    0.74 
   2   6   9   27.69    0.67 
  -3  -6  -9    1.55    0.25 
   3  -6   9    1.25    0.21 
   3   6   9    1.25    0.17 
  -3   6  -9    1.33    0.20 
   4  -6   9   26.29    0.76 
  -4  -6  -9   25.03    0.82 
   4   6   9   26.19    0.71 
  -4   6  -9   24.83    0.72 
   5  -6   9    9.61    0.46 
  -5  -6  -9    9.28    0.51 
  -5   6  -9    8.79    0.43 
   5   6   9    9.36    0.43 
   6  -6   9    7.50    0.43 
  -6  -6  -9    7.34    0.46 
   6   6   9    7.60    0.41 
  -6   6  -9    8.24    0.43 
   7  -6   9   11.03    0.52 
  -7  -6  -9   10.53    0.56 
   7   6   9   10.39    0.49 
  -7   6  -9   10.14    0.49 
  -8  -6  -9    6.91    0.47 
   8  -6   9    7.48    0.46 
   8   6   9    7.40    0.44 
  -8   6  -9    7.68    0.45 
  -9  -6  -9    6.62    0.47 
   9  -6   9    6.34    0.44 
   9   6   9    6.05    0.42 
  -9   6  -9    5.92    0.42 
 -10  -6  -9    6.68    0.51 
  10  -6   9    6.64    0.46 
 -10   6  -9    6.15    0.45 
  10   6   9    6.65    0.45 
 -11  -6  -9   17.30    0.79 
  11   6   9   16.93    0.75 
 -11   6  -9   17.91    0.76 
 -10  -7   9    1.25    0.28 
  10  -7  -9    0.70    0.28 
 -10   7   9    1.01    0.27 
   9  -7  -9    9.36    0.59 
  -9  -7   9    9.90    0.54 
  -9   7   9    8.62    0.53 
   8  -7  -9    0.11    0.18 
  -8  -7   9    0.12    0.15 
  -8   7   9    0.03    0.16 
   7  -7  -9    1.14    0.27 
  -7  -7   9    1.28    0.22 
  -7   7   9    0.65    0.20 
   6  -7  -9   10.39    0.56 
  -6  -7   9   11.63    0.49 
  -6  -7   9   10.73    0.47 
  -6   7   9   11.45    0.53 
   5  -7  -9    9.02    0.51 
  -5  -7   9    8.30    0.41 
  -5   7   9    8.41    0.43 
  -4  -7   9    0.29    0.13 
   4  -7  -9    0.26    0.17 
   4   7  -9    0.41    0.13 
  -4   7   9    0.34    0.13 
   3  -7  -9    3.69    0.37 
  -3  -7   9    3.29    0.27 
   3   7  -9    3.70    0.27 
  -3   7   9    3.49    0.28 
  -2  -7   9    4.82    0.33 
   2  -7  -9    5.45    0.39 
  -2   7   9    5.44    0.31 
   2   7  -9    5.19    0.31 
   1  -7  -9    1.52    0.26 
  -1  -7   9    1.03    0.19 
  -1   7   9    1.67    0.20 
   1   7  -9    1.46    0.20 
   0  -7  -9   12.41    0.57 
   0  -7   9   11.84    0.48 
   0   7  -9   11.88    0.46 
  -1  -7  -9   22.59    0.77 
   1  -7   9   21.72    0.68 
  -1   7  -9   23.34    0.67 
   1   7   9   21.67    0.58 
  -2  -7  -9   13.64    0.60 
   2  -7   9   13.79    0.54 
   2   7   9   15.48    0.49 
  -2   7  -9   14.49    0.52 
   3  -7   9   10.89    0.49 
  -3  -7  -9   10.93    0.54 
   3   7   9   11.56    0.45 
  -3   7  -9   10.65    0.46 
  -4  -7  -9   11.59    0.56 
   4  -7   9   10.50    0.49 
  -4   7  -9   11.38    0.48 
   4   7   9   10.79    0.46 
   5  -7   9   38.00    1.00 
  -5  -7  -9   37.56    1.08 
   5   7   9   40.03    0.96 
  -5   7  -9   38.63    0.97 
  -6  -7  -9    4.67    0.39 
   6  -7   9    4.78    0.37 
  -6   7  -9    5.55    0.37 
   6   7   9    5.26    0.36 
  -7  -7  -9    1.98    0.31 
   7  -7   9    2.14    0.30 
  -7   7  -9    1.47    0.24 
   7   7   9    1.90    0.26 
  -8  -7  -9   23.61    0.88 
   8  -7   9   23.87    0.83 
   8   7   9   23.79    0.80 
  -8   7  -9   21.59    0.77 
   9  -7   9   22.07    0.81 
  -9  -7  -9   24.32    0.91 
  -9   7  -9   23.03    0.82 
   9   7   9   21.36    0.80 
 -10  -7  -9    7.99    0.55 
  10  -7   9    7.77    0.52 
  10   7   9    7.08    0.49 
 -10   7  -9    7.80    0.51 
  10  -8  -9   12.46    0.70 
 -10  -8   9   14.34    0.69 
 -10   8   9   14.20    0.71 
   9  -8  -9    0.39    0.25 
  -9  -8   9    0.75    0.24 
  -9   8   9    0.44    0.23 
   8  -8  -9   -0.13    0.18 
  -8   8   9    0.40    0.19 
   7  -8  -9    5.78    0.47 
  -7   8   9    6.00    0.43 
   6  -8  -9    6.75    0.47 
  -6   8   9    6.73    0.43 
  -5  -8   9    1.54    0.23 
   5  -8  -9    1.46    0.28 
   5   8  -9    1.41    0.21 
  -5   8   9    1.78    0.26 
   4  -8  -9    6.43    0.45 
  -4  -8   9    6.78    0.39 
   4   8  -9    6.31    0.36 
  -4   8   9    6.24    0.38 
  -3  -8   9   41.16    1.00 
   3  -8  -9   40.34    1.13 
  -3   8   9   41.88    0.98 
   3   8  -9   41.11    0.96 
  -2  -8   9   23.49    0.72 
   2  -8  -9   23.31    0.83 
   2   8  -9   22.50    0.68 
  -2   8   9   24.52    0.69 
   1  -8  -9    0.62    0.21 
  -1  -8   9    0.76    0.18 
   1   8  -9    0.92    0.18 
   0  -8  -9   21.68    0.79 
   0  -8   9   22.47    0.71 
   0   8  -9   21.99    0.67 
   1  -8   9    9.19    0.44 
  -1  -8  -9    8.92    0.51 
  -1   8  -9    8.68    0.42 
  -2  -8  -9   13.39    0.62 
   2  -8   9   11.77    0.52 
  -2   8  -9   13.62    0.53 
   2   8   9   13.34    0.48 
  -3  -8  -9    1.22    0.26 
   3  -8   9    1.73    0.25 
   3   8   9    1.72    0.23 
  -3   8  -9    1.48    0.22 
   4  -8   9    4.81    0.35 
  -4  -8  -9    4.87    0.40 
  -4   8  -9    4.49    0.34 
   4   8   9    4.36    0.31 
  -5  -8  -9    2.32    0.34 
   5  -8   9    1.84    0.28 
   5   8   9    2.19    0.26 
  -5   8  -9    1.98    0.27 
   6  -8   9   25.66    0.84 
  -6  -8  -9   24.75    0.90 
   6   8   9   24.39    0.78 
  -6   8  -9   24.10    0.78 
   7  -8   9    2.09    0.32 
  -7  -8  -9    2.22    0.34 
   7   8   9    2.07    0.28 
  -7   8  -9    1.71    0.27 
  -8  -8  -9    0.51    0.23 
   8  -8   9    0.57    0.24 
  -8   8  -9    0.77    0.22 
   8   8   9    0.65    0.20 
  -9  -8  -9   18.23    0.82 
   9  -8   9   18.89    0.78 
  -9   8  -9   18.43    0.74 
   9   8   9   18.67    0.75 
  10  -8   9    7.87    0.54 
 -10  -8  -9    9.06    0.61 
 -10   8  -9    7.94    0.52 
  -9   9   9   12.84    0.67 
   8  -9  -9    7.32    0.55 
  -8   9   9    6.31    0.47 
   7  -9  -9   10.03    0.60 
  -7   9   9    9.53    0.54 
   6  -9  -9   19.82    0.83 
  -6   9   9   19.70    0.74 
   5  -9  -9    0.88    0.26 
   5   9  -9    0.61    0.17 
  -5   9   9    0.93    0.22 
  -4  -9   9    5.61    0.37 
   4  -9  -9    4.97    0.47 
   4   9  -9    5.37    0.36 
  -4   9   9    5.38    0.37 
  -3  -9   9    4.73    0.35 
   3  -9  -9    4.97    0.42 
   3   9  -9    5.03    0.33 
  -3   9   9    5.38    0.36 
  -2  -9   9    5.72    0.38 
   2  -9  -9    5.65    0.45 
   2   9  -9    5.72    0.35 
  -1  -9   9    7.93    0.43 
   1  -9  -9    7.65    0.50 
   1   9  -9    7.47    0.41 
   0  -9  -9   15.08    0.68 
   0  -9   9   16.20    0.62 
   0   9  -9   15.63    0.58 
  -1  -9  -9   14.73    0.67 
   1  -9   9   15.71    0.61 
  -1   9  -9   14.84    0.58 
  -2  -9  -9    2.81    0.36 
   2  -9   9    2.18    0.27 
   2   9   9    2.67    0.27 
  -2   9  -9    2.91    0.31 
   3  -9   9   11.34    0.53 
  -3  -9  -9   12.02    0.62 
   3   9   9   11.73    0.49 
  -3   9  -9   11.65    0.52 
  -4  -9  -9   10.26    0.60 
   4  -9   9   11.73    0.55 
   4   9   9   10.01    0.48 
  -4   9  -9   10.56    0.51 
   5  -9   9   22.46    0.80 
  -5  -9  -9   22.81    0.87 
  -5   9  -9   21.51    0.75 
   5   9   9   23.22    0.75 
  -6  -9  -9    6.97    0.52 
   6  -9   9    7.58    0.49 
  -6   9  -9    6.48    0.42 
   6   9   9    7.80    0.45 
  -7  -9  -9    5.94    0.48 
   7  -9   9    6.27    0.45 
  -7   9  -9    5.59    0.42 
   7   9   9    6.30    0.43 
   8  -9   9   11.39    0.61 
  -8  -9  -9   10.79    0.64 
   8   9   9   12.15    0.61 
  -8   9  -9   11.79    0.59 
   9  -9   9    1.84    0.33 
  -9  -9  -9    1.92    0.37 
   9   9   9    1.80    0.31 
  -9   9  -9    2.58    0.35 
  -8  10   9    3.01    0.39 
   7 -10  -9    1.63    0.35 
  -7  10   9    1.83    0.32 
   6 -10  -9    0.10    0.21 
  -6  10   9   -0.05    0.16 
   5 -10  -9    0.64    0.26 
  -5  10   9    0.44    0.19 
   5  10  -9    0.85    0.22 
   4 -10  -9    3.85    0.44 
   4  10  -9    3.32    0.34 
  -4  10   9    4.26    0.36 
   3 -10  -9   16.15    0.75 
  -3 -10   9   17.02    0.64 
   3  10  -9   15.95    0.63 
   2 -10  -9   10.85    0.60 
  -2 -10   9   10.48    0.51 
   2  10  -9   10.32    0.50 
  -1 -10   9    3.52    0.36 
   1 -10  -9    4.37    0.45 
   1  10  -9    3.86    0.32 
   0 -10   9   25.71    0.81 
   0 -10  -9   27.50    0.96 
   0  10  -9   26.19    0.81 
  -1 -10  -9   13.11    0.67 
   1 -10   9   14.50    0.60 
  -1  10  -9   13.67    0.58 
   2 -10   9    3.81    0.38 
  -2 -10  -9    3.55    0.42 
  -2  10  -9    3.59    0.36 
   2  10   9    3.64    0.34 
   3 -10   9    1.33    0.25 
  -3 -10  -9    1.28    0.29 
  -3  10  -9    1.40    0.24 
   3  10   9    1.75    0.25 
  -4 -10  -9    3.84    0.43 
   4 -10   9    3.29    0.37 
   4  10   9    4.46    0.35 
  -4  10  -9    4.55    0.36 
  -5 -10  -9    7.89    0.55 
   5 -10   9    8.48    0.52 
   5  10   9    8.76    0.48 
  -5  10  -9    9.76    0.51 
   6 -10   9   19.11    0.78 
  -6 -10  -9   18.36    0.82 
  -6  10  -9   19.44    0.75 
   6  10   9   18.12    0.72 
  -7 -10  -9    1.81    0.35 
   7 -10   9    1.47    0.30 
  -7  10  -9    1.37    0.27 
   7  10   9    0.83    0.23 
   8 -10   9    0.39    0.25 
  -8 -10  -9    0.44    0.28 
   8  10   9    0.61    0.21 
  -8  10  -9    0.54    0.22 
  -7  11   9   23.95    0.90 
  -6  11   9   12.45    0.63 
   5 -11  -9    3.93    0.47 
  -5  11   9    4.71    0.44 
   5  11  -9    4.09    0.41 
   4 -11  -9    0.25    0.23 
   4  11  -9    0.26    0.18 
   3 -11  -9    7.32    0.54 
   3  11  -9    7.22    0.44 
   2 -11  -9    0.02    0.21 
  -2 -11   9   -0.14    0.14 
   2  11  -9    0.21    0.15 
  -1 -11   9    3.94    0.39 
   1 -11  -9    3.61    0.44 
   1  11  -9    3.76    0.37 
   0 -11   9    6.47    0.42 
   0 -11  -9    5.77    0.49 
   0  11  -9    6.80    0.43 
   1 -11   9    1.00    0.24 
  -1 -11  -9    1.27    0.29 
  -1  11  -9    0.96    0.21 
   2 -11   9    4.25    0.41 
  -2 -11  -9    4.95    0.50 
  -2  11  -9    5.11    0.39 
  -3 -11  -9    7.05    0.54 
   3 -11   9    6.84    0.47 
   3  11   9    6.90    0.42 
  -3  11  -9    6.95    0.46 
   4 -11   9    1.08    0.26 
  -4 -11  -9    0.95    0.28 
   4  11   9    1.45    0.25 
  -4  11  -9    1.19    0.26 
   5 -11   9    2.08    0.32 
  -5 -11  -9    2.45    0.39 
  -5  11  -9    2.21    0.31 
   5  11   9    1.62    0.27 
   6 -11   9    5.76    0.48 
  -6 -11  -9    4.65    0.51 
   6  11   9    6.21    0.45 
  -6  11  -9    5.77    0.45 
  -7 -11  -9   14.21    0.77 
   7 -11   9   14.90    0.74 
  -7  11  -9   14.66    0.69 
   7  11   9   14.46    0.68 
  -6  12   9    4.41    0.46 
   5  12  -9    2.45    0.34 
   4  12  -9    1.52    0.29 
   3 -12  -9    8.17    0.60 
   3  12  -9    6.23    0.46 
   2 -12  -9   11.06    0.67 
   2  12  -9    9.83    0.55 
  -1 -12   9    3.51    0.39 
   1 -12  -9    3.43    0.45 
   1  12  -9    3.76    0.39 
   0 -12  -9    6.61    0.52 
   0 -12   9    6.38    0.44 
   0  12  -9    6.64    0.47 
   1 -12   9   12.86    0.62 
  -1 -12  -9   13.60    0.72 
  -1  12  -9   12.40    0.62 
  -2 -12  -9   14.43    0.75 
   2 -12   9   13.99    0.66 
  -2  12  -9   13.65    0.65 
  -3 -12  -9    1.33    0.32 
   3 -12   9    1.59    0.29 
  -3  12  -9    1.55    0.28 
   4 -12   9    4.48    0.46 
  -4 -12  -9    3.77    0.46 
   4  12   9    3.70    0.39 
  -4  12  -9    4.07    0.43 
  -5 -12  -9    3.59    0.47 
   5 -12   9    5.70    0.48 
  -5  12  -9    4.46    0.45 
   5  12   9    5.08    0.42 
   3  13  -9    2.53    0.37 
   2  13  -9    1.74    0.32 
   1 -13  -9    2.71    0.44 
   1  13  -9    2.26    0.35 
   0 -13  -9    6.84    0.56 
   0 -13   9    6.75    0.48 
   0  13  -9    6.77    0.50 
   1 -13   9    4.38    0.45 
  -1 -13  -9    4.46    0.51 
  -1  13  -9    4.89    0.47 
  -2 -13  -9    1.32    0.35 
   2 -13   9    2.54    0.37 
  -2  13  -9    2.44    0.37 
   3 -13   9    2.94    0.38 
  -3 -13  -9    4.66    0.52 
  -3  13  -9    3.50    0.42 
  12   0 -10    5.97    0.57 
 -12   0  10    5.94    0.44 
  11   0 -10   17.84    0.80 
 -11   0  10   18.57    0.71 
 -10   0  10    0.38    0.17 
  10   0 -10    0.47    0.22 
  -9   0  10    2.01    0.27 
   9   0 -10    1.46    0.27 
  -8   0  10    0.77    0.18 
   8   0 -10    0.78    0.20 
   7   0 -10   38.43    1.03 
  -7   0  10   39.83    0.96 
   6   0 -10   37.44    0.97 
  -6   0  10   38.39    0.92 
  -5   0  10    3.84    0.29 
   5   0 -10    3.76    0.30 
  -4   0  10  303.67    4.25 
   4   0 -10  297.27    4.30 
   3   0 -10    5.87    0.32 
  -3   0  10    5.54    0.31 
  -2   0  10   17.91    0.54 
   2   0 -10   16.96    0.54 
  -1   0  10    2.97    0.23 
   1   0 -10    3.44    0.23 
   0   0 -10    6.61    0.32 
   0   0  10    6.71    0.32 
   0   0 -10    6.21    0.25 
  -1   0 -10   72.59    1.31 
   1   0  10   72.62    1.30 
  -1   0 -10   72.48    1.19 
  -2   0 -10    7.33    0.31 
  -2   0 -10    8.14    0.35 
   2   0  10    8.14    0.34 
   3   0  10    2.61    0.21 
  -3   0 -10    2.49    0.22 
  -3   0 -10    2.67    0.21 
   4   0  10    5.89    0.30 
  -4   0 -10    6.35    0.32 
  -4   0 -10    6.36    0.31 
   5   0  10   64.62    1.18 
  -5   0 -10   62.01    1.23 
  -5   0 -10   64.73    1.23 
  -6   0 -10   14.37    0.53 
  -7   0 -10    2.70    0.29 
  -8   0 -10   17.42    0.66 
  -9   0 -10    9.43    0.51 
 -10   0 -10    3.37    0.37 
  12   0  10    9.81    0.61 
  12  -1 -10    2.61    0.41 
 -12   1  10    2.76    0.37 
  12   1 -10    2.95    0.42 
 -11  -1  10   15.73    0.65 
  11  -1 -10   15.55    0.76 
 -11   1  10   16.49    0.69 
  11   1 -10   14.90    0.75 
  10  -1 -10    5.58    0.45 
 -10  -1  10    6.08    0.40 
 -10   1  10    5.53    0.40 
  10   1 -10    5.31    0.45 
  -9  -1  10    5.36    0.36 
   9  -1 -10    4.87    0.41 
   9   1 -10    4.76    0.39 
  -9   1  10    5.29    0.37 
  -8  -1  10    8.82    0.44 
   8  -1 -10    9.53    0.51 
   8   1 -10    9.50    0.51 
  -8   1  10    8.52    0.44 
   7  -1 -10   20.16    0.71 
  -7  -1  10   19.13    0.64 
   7   1 -10   19.55    0.69 
  -7   1  10   18.73    0.63 
  -6  -1  10    7.84    0.39 
   6   1 -10    7.61    0.41 
  -6   1  10    7.49    0.39 
  -5  -1  10    3.40    0.26 
   5  -1 -10    3.06    0.30 
   5   1 -10    3.25    0.30 
  -5   1  10    3.25    0.26 
  -4  -1  10   29.15    0.76 
   4  -1 -10   30.41    0.81 
  -4   1  10   29.36    0.76 
   4   1 -10   29.83    0.77 
   3  -1 -10   46.28    1.03 
  -3  -1  10   46.17    1.00 
  -3   1  10   46.85    0.99 
   3   1 -10   47.37    0.99 
  -2  -1  10   13.14    0.47 
   2  -1 -10   13.30    0.48 
  -2   1  10   12.44    0.44 
   2   1 -10   13.10    0.45 
  -1  -1  10    0.41    0.11 
   1  -1 -10    0.39    0.12 
   1   1 -10    0.45    0.09 
  -1   1  10    0.22    0.10 
   1   1 -10    0.29    0.10 
   0  -1  10   11.58    0.43 
   0  -1 -10   12.14    0.34 
   0  -1 -10   12.60    0.46 
   0   1  10   11.78    0.42 
   0   1 -10   11.07    0.34 
   0   1 -10   11.77    0.41 
  -1  -1 -10    8.68    0.31 
  -1  -1 -10    8.10    0.37 
   1  -1  10    8.20    0.36 
  -1   1 -10    8.87    0.32 
  -1   1 -10    8.94    0.35 
   1   1  10    8.14    0.34 
   2  -1  10    5.62    0.30 
  -2  -1 -10    5.20    0.26 
  -2  -1 -10    5.79    0.30 
  -2   1 -10    6.04    0.28 
   2   1  10    5.60    0.28 
  -2   1 -10    5.50    0.27 
  -3  -1 -10    1.19    0.17 
   3  -1  10    0.89    0.15 
  -3  -1 -10    0.80    0.14 
   3   1  10    0.91    0.14 
  -3   1 -10    1.06    0.15 
  -3   1 -10    1.01    0.15 
  -4  -1 -10    0.64    0.15 
  -4  -1 -10    0.83    0.16 
   4  -1  10    0.57    0.14 
   4   1  10    0.60    0.13 
  -4   1 -10    0.67    0.14 
   5  -1  10   18.15    0.55 
  -5  -1 -10   18.61    0.59 
  -5  -1 -10   18.85    0.60 
  -5   1 -10   18.86    0.59 
   6  -1  10   14.24    0.49 
  -6  -1 -10   13.04    0.52 
  -6  -1 -10   13.10    0.50 
  -6   1 -10   13.63    0.52 
  -7  -1 -10    3.63    0.30 
  -7  -1 -10    3.45    0.29 
  -7   1 -10    3.37    0.32 
  -8  -1 -10   16.26    0.63 
  -8   1 -10   15.99    0.62 
  -9  -1 -10    6.39    0.42 
  -9   1 -10    6.51    0.43 
  10   1  10    0.71    0.22 
 -10   1 -10    0.36    0.19 
  11   1  10    7.91    0.52 
 -11   1 -10    7.93    0.51 
 -12   1 -10    1.76    0.34 
  12   1  10    2.47    0.37 
  12  -2 -10    0.71    0.29 
 -12   2  10    0.69    0.25 
  12   2 -10    0.43    0.26 
  11  -2 -10   12.01    0.66 
 -11   2  10   11.79    0.59 
  11   2 -10   12.95    0.69 
  10  -2 -10    8.24    0.54 
 -10  -2  10    9.07    0.47 
  10   2 -10    7.92    0.53 
 -10   2  10    7.91    0.47 
   9  -2 -10    6.05    0.44 
  -9  -2  10    5.41    0.35 
   9   2 -10    5.58    0.43 
  -9   2  10    5.21    0.37 
   8  -2 -10    9.56    0.52 
  -8  -2  10    8.89    0.44 
  -8   2  10    8.13    0.44 
   8   2 -10    8.27    0.47 
   7  -2 -10    7.87    0.45 
  -7  -2  10    7.53    0.40 
   7   2 -10    8.69    0.46 
  -7   2  10    8.66    0.43 
   6  -2 -10    0.76    0.19 
  -6  -2  10    0.61    0.15 
   6   2 -10    0.81    0.18 
  -6   2  10    0.64    0.15 
   5  -2 -10    1.99    0.26 
  -5  -2  10    2.63    0.27 
   5   2 -10    1.97    0.24 
  -5   2  10    2.40    0.25 
  -4  -2  10   70.11    1.35 
   4  -2 -10   70.43    1.41 
  -4   2  10   70.07    1.34 
   4   2 -10   71.27    1.34 
  -3  -2  10    1.26    0.18 
   3  -2 -10    1.45    0.21 
   3   2 -10    1.61    0.19 
  -3   2  10    1.57    0.20 
  -2  -2  10   13.03    0.47 
   2  -2 -10   12.71    0.49 
  -2   2  10   12.25    0.45 
   2   2 -10   13.05    0.44 
   1  -2 -10   12.81    0.49 
  -1  -2  10   13.17    0.47 
   1   2 -10   13.75    0.38 
  -1   2  10   13.50    0.45 
   1   2 -10   14.33    0.45 
   0  -2 -10   60.48    1.23 
   0  -2  10   60.71    1.18 
   0   2 -10   61.06    1.04 
   0   2  10   60.18    1.12 
   0   2 -10   60.66    1.10 
  -1  -2 -10   31.32    0.80 
   1  -2  10   33.15    0.78 
  -1  -2 -10   30.96    0.66 
  -1   2 -10   32.55    0.70 
  -1   2 -10   32.85    0.70 
   1   2  10   30.09    0.70 
  -2  -2 -10   19.13    0.60 
   2  -2  10   18.23    0.55 
  -2  -2 -10   18.65    0.51 
   2   2  10   18.72    0.51 
  -2   2 -10   18.53    0.51 
  -3  -2 -10    5.44    0.32 
  -3  -2 -10    4.92    0.27 
   3  -2  10    5.10    0.30 
  -3   2 -10    4.84    0.28 
   3   2  10    4.83    0.25 
   4  -2  10   50.09    1.03 
  -4  -2 -10   49.44    1.09 
  -4  -2 -10   51.82    1.04 
  -4   2 -10   50.08    1.04 
  -5  -2 -10   48.77    1.09 
   5  -2  10   47.85    1.01 
  -5  -2 -10   47.65    1.04 
  -5   2 -10   47.61    1.04 
   6  -2  10    6.25    0.34 
  -6  -2 -10    6.24    0.36 
  -6   2 -10    6.12    0.35 
  -7  -2 -10    1.27    0.22 
  -7   2 -10    0.67    0.17 
  -8  -2 -10   23.95    0.77 
  -8   2 -10   23.44    0.77 
   8   2  10   23.11    0.77 
  -9   2 -10    7.00    0.44 
   9   2  10    6.66    0.44 
 -10   2 -10   16.08    0.69 
  10   2  10   15.99    0.68 
 -11   2 -10    2.43    0.36 
  11   2  10    2.22    0.33 
 -12   3  10    1.14    0.28 
  11  -3 -10    8.59    0.59 
 -11   3  10    9.08    0.53 
  11   3 -10    8.21    0.57 
  10  -3 -10    1.12    0.28 
 -10   3  10    0.86    0.23 
  10   3 -10    1.05    0.26 
  -9  -3  10   21.10    0.70 
  -9   3  10   21.95    0.76 
   9   3 -10   22.19    0.81 
   8  -3 -10   10.30    0.55 
  -8  -3  10   10.29    0.47 
  -8   3  10   11.09    0.52 
   8   3 -10   10.80    0.53 
   7  -3 -10    3.07    0.34 
  -7  -3  10    2.92    0.29 
  -7   3  10    2.73    0.30 
   7   3 -10    3.16    0.33 
  -6  -3  10   11.27    0.47 
   6  -3 -10   11.55    0.53 
  -6   3  10   11.31    0.48 
   6   3 -10   11.52    0.49 
   5  -3 -10    2.53    0.29 
  -5  -3  10    2.42    0.26 
   5   3 -10    3.06    0.29 
  -5   3  10    2.40    0.25 
  -4  -3  10    2.56    0.26 
   4  -3 -10    2.76    0.30 
   4   3 -10    3.12    0.23 
  -4   3  10    2.52    0.25 
   3  -3 -10    0.62    0.17 
  -3  -3  10    0.64    0.15 
   3   3 -10    0.84    0.14 
  -3   3  10    0.87    0.15 
  -2  -3  10    3.52    0.26 
   2  -3 -10    3.68    0.28 
   2   3 -10    4.06    0.21 
   2   3 -10    3.87    0.24 
  -2   3  10    3.12    0.23 
  -1  -3  10   12.11    0.46 
   1  -3 -10   12.80    0.50 
   1   3 -10   13.40    0.42 
   1   3 -10   12.52    0.38 
  -1   3  10   13.41    0.44 
   0  -3  10    2.90    0.27 
   0  -3 -10    3.45    0.27 
   0   3 -10    3.40    0.21 
   0   3  10    3.22    0.21 
   1  -3  10   50.95    1.06 
  -1  -3 -10   51.58    1.13 
  -1   3 -10   50.22    0.96 
   1   3  10   51.20    0.91 
   1   3  10   50.70    0.97 
   2  -3  10    8.94    0.39 
  -2  -3 -10    9.39    0.44 
   2   3  10    9.21    0.34 
  -2   3 -10    9.65    0.37 
   2   3  10    8.97    0.33 
  -3  -3 -10   30.57    0.82 
   3  -3  10   28.89    0.75 
   3   3  10   30.29    0.71 
  -3   3 -10   30.13    0.73 
  -4  -3 -10    2.18    0.26 
   4  -3  10    2.47    0.25 
  -4   3 -10    2.49    0.25 
   4   3  10    2.38    0.23 
  -5  -3 -10   46.14    1.10 
   5  -3  10   47.96    1.03 
  -5   3 -10   46.54    1.04 
   5   3  10   47.14    1.03 
   6  -3  10    3.03    0.29 
  -6  -3 -10    2.48    0.29 
   6   3  10    2.93    0.29 
  -6   3 -10    2.79    0.28 
  -7  -3 -10   19.98    0.71 
   7  -3  10   20.73    0.66 
   7   3  10   20.79    0.69 
  -7   3 -10   20.44    0.69 
  -8  -3 -10    0.00    0.13 
  -8   3 -10    0.01    0.13 
   8   3  10    0.10    0.13 
  -9  -3 -10    7.71    0.48 
   9   3  10    6.36    0.42 
  -9   3 -10    7.62    0.45 
 -10  -3 -10    0.95    0.23 
  10   3  10    0.89    0.22 
 -10   3 -10    0.59    0.22 
 -11   3 -10    4.62    0.46 
  11   3  10    4.06    0.42 
  11  -4 -10    0.03    0.21 
  11   4 -10    0.55    0.25 
 -11   4  10    0.28    0.19 
  10  -4 -10   21.92    0.87 
 -10   4  10   20.48    0.78 
  10   4 -10   21.88    0.85 
  -9  -4  10    7.88    0.43 
   9  -4 -10    7.53    0.50 
   9   4 -10    6.59    0.47 
  -9   4  10    7.09    0.45 
  -8  -4  10    4.23    0.32 
   8  -4 -10    4.16    0.42 
   8   4 -10    3.42    0.36 
  -8   4  10    3.89    0.37 
  -7  -4  10   11.16    0.48 
   7  -4 -10    9.58    0.52 
   7   4 -10    9.60    0.49 
  -7   4  10   10.64    0.49 
   6  -4 -10   10.26    0.52 
  -6  -4  10   11.58    0.48 
   6   4 -10   10.10    0.47 
  -6   4  10    9.82    0.46 
   5  -4 -10    3.00    0.33 
  -5  -4  10    2.75    0.27 
   5   4 -10    2.26    0.25 
  -5   4  10    2.79    0.28 
   4  -4 -10    9.04    0.46 
  -4  -4  10    7.96    0.40 
   4   4 -10    9.17    0.39 
  -4   4  10    9.04    0.41 
  -3  -4  10    8.71    0.41 
   3  -4 -10    9.24    0.46 
   3   4 -10    8.93    0.37 
  -3   4  10    9.64    0.40 
   2  -4 -10    1.13    0.21 
  -2  -4  10    1.21    0.19 
   2   4 -10    1.31    0.16 
   2   4 -10    1.22    0.16 
  -2   4  10    1.02    0.16 
   1  -4 -10   38.51    0.98 
  -1  -4  10   38.26    0.90 
   1   4 -10   38.84    0.79 
  -1   4  10   38.03    0.83 
   0  -4 -10   72.17    1.45 
   0  -4  10   69.57    1.34 
   0   4 -10   69.54    1.23 
   0   4  10   71.65    1.25 
   1  -4  10    1.37    0.20 
  -1  -4 -10    1.26    0.21 
  -1   4 -10    0.94    0.15 
   1   4  10    1.29    0.16 
   1   4  10    1.22    0.15 
  -2  -4 -10    4.01    0.31 
   2  -4  10    3.87    0.29 
   2   4  10    4.07    0.23 
  -2   4 -10    4.50    0.26 
   3  -4  10    6.91    0.36 
  -3  -4 -10    6.45    0.39 
  -3   4 -10    7.06    0.34 
   3   4  10    6.43    0.31 
   4  -4  10   28.35    0.76 
  -4  -4 -10   26.28    0.80 
  -4   4 -10   25.87    0.71 
   4   4  10   27.41    0.70 
  -5  -4 -10    5.90    0.39 
   5  -4  10    5.59    0.34 
   5   4  10    5.78    0.33 
  -5   4 -10    5.62    0.33 
  -6  -4 -10   22.41    0.75 
   6  -4  10   22.09    0.69 
   6   4  10   22.13    0.69 
  -6   4 -10   22.19    0.70 
  -7  -4 -10    0.42    0.18 
   7  -4  10    1.13    0.21 
   7   4  10    0.89    0.19 
  -7   4 -10    0.52    0.18 
  -8  -4 -10    3.22    0.36 
   8  -4  10    2.91    0.31 
  -8   4 -10    2.30    0.29 
   8   4  10    2.57    0.30 
  -9  -4 -10    5.78    0.43 
   9   4  10    5.15    0.38 
  -9   4 -10    4.92    0.38 
 -10  -4 -10   18.68    0.77 
  10   4  10   18.37    0.75 
 -10   4 -10   19.79    0.77 
 -11  -4 -10    1.89    0.33 
  11   4  10    2.05    0.34 
 -11   4 -10    1.50    0.29 
  11  -5 -10   15.44    0.77 
  11   5 -10   14.66    0.74 
 -11   5  10   15.41    0.71 
  10  -5 -10    1.70    0.33 
  10   5 -10    1.37    0.29 
 -10   5  10    1.43    0.28 
   9  -5 -10   12.17    0.65 
   9   5 -10   12.74    0.62 
  -9   5  10   11.64    0.57 
  -8  -5  10    0.96    0.20 
   8  -5 -10    0.83    0.24 
  -8   5  10    0.94    0.21 
   8   5 -10    0.55    0.19 
   7  -5 -10    2.80    0.35 
  -7  -5  10    2.90    0.29 
   7   5 -10    3.34    0.35 
  -7   5  10    2.74    0.32 
  -6  -5  10    0.78    0.17 
   6  -5 -10    0.67    0.20 
  -6   5  10    0.79    0.18 
   6   5 -10    0.71    0.18 
   5  -5 -10    2.37    0.31 
  -5  -5  10    2.20    0.25 
  -5   5  10    2.65    0.28 
   5   5 -10    2.21    0.25 
  -4  -5  10   15.90    0.57 
   4  -5 -10   16.54    0.65 
  -4   5  10   16.13    0.56 
   4   5 -10   16.68    0.53 
   3  -5 -10    9.37    0.48 
  -3  -5  10    9.93    0.44 
  -3   5  10    9.66    0.41 
  -2  -5  10    0.47    0.14 
   2  -5 -10    0.41    0.16 
   2   5 -10    0.19    0.10 
  -2   5  10    0.20    0.11 
  -1  -5  10    3.04    0.29 
   1  -5 -10    3.07    0.33 
   1   5 -10    2.96    0.22 
  -1   5  10    3.22    0.23 
   0  -5 -10   27.28    0.83 
   0  -5  10   26.50    0.74 
   0   5  10   28.01    0.67 
   0   5 -10   28.85    0.69 
  -1  -5 -10   94.87    1.81 
   1  -5  10   93.30    1.69 
  -1   5 -10   92.75    1.58 
   1   5  10   94.70    1.50 
   2  -5  10   25.99    0.73 
  -2  -5 -10   26.73    0.82 
  -2   5 -10   26.21    0.69 
   2   5  10   26.27    0.64 
   3  -5  10   28.53    0.78 
  -3  -5 -10   28.36    0.86 
   3   5  10   27.04    0.69 
  -3   5 -10   27.82    0.73 
  -4  -5 -10    1.89    0.28 
   4  -5  10    1.87    0.25 
  -4   5 -10    2.43    0.25 
   4   5  10    2.41    0.24 
   5  -5  10   14.93    0.56 
  -5  -5 -10   14.36    0.62 
   5   5  10   14.31    0.53 
  -5   5 -10   14.20    0.54 
   6  -5  10   16.00    0.60 
  -6  -5 -10   15.56    0.65 
  -6   5 -10   15.58    0.59 
   6   5  10   15.70    0.58 
   7  -5  10   10.96    0.51 
  -7  -5 -10   10.62    0.55 
   7   5  10   11.26    0.52 
  -7   5 -10   10.68    0.51 
  -8  -5 -10    1.87    0.29 
   8  -5  10    1.47    0.26 
   8   5  10    1.75    0.26 
  -8   5 -10    1.08    0.22 
  -9  -5 -10    3.57    0.41 
   9  -5  10    3.63    0.37 
  -9   5 -10    3.39    0.37 
   9   5  10    3.82    0.39 
 -10  -5 -10    0.66    0.24 
  10   5  10    0.85    0.24 
 -10   5 -10    0.97    0.25 
 -11  -5 -10    1.56    0.32 
 -11   5 -10    1.43    0.29 
  11   5  10    1.79    0.32 
  10  -6 -10    4.52    0.49 
 -10   6  10    5.22    0.44 
  10   6 -10    4.08    0.44 
   9  -6 -10    6.20    0.51 
   9   6 -10    6.20    0.46 
  -9   6  10    7.06    0.47 
   8  -6 -10   11.89    0.63 
  -8   6  10   12.08    0.58 
   8   6 -10   11.99    0.57 
  -7  -6  10    8.07    0.42 
   7  -6 -10    7.72    0.50 
  -7   6  10    7.37    0.45 
   7   6 -10    7.64    0.43 
   6  -6 -10   17.47    0.73 
  -6  -6  10   18.40    0.62 
  -6   6  10   17.84    0.65 
   6   6 -10   17.30    0.62 
  -5  -6  10    8.87    0.44 
   5  -6 -10    8.50    0.51 
   5   6 -10    8.46    0.41 
  -5   6  10    8.74    0.44 
   4  -6 -10    2.46    0.31 
  -4  -6  10    2.75    0.29 
  -4   6  10    2.37    0.27 
   3  -6 -10    9.08    0.50 
  -3  -6  10    9.43    0.44 
   3   6 -10    8.95    0.37 
  -3   6  10    8.64    0.41 
  -2  -6  10   32.97    0.86 
   2  -6 -10   32.23    0.96 
  -2   6  10   33.05    0.81 
   2   6 -10   33.62    0.78 
   1  -6 -10   22.53    0.78 
  -1  -6  10   24.40    0.71 
  -1   6  10   23.41    0.63 
   1   6 -10   23.00    0.63 
   0  -6  10   27.76    0.78 
   0  -6 -10   27.49    0.86 
   0   6 -10   28.41    0.72 
   0   6  10   29.03    0.69 
  -1  -6 -10    5.10    0.38 
   1  -6  10    4.82    0.32 
  -1   6 -10    5.69    0.31 
  -2  -6 -10    8.47    0.47 
   2  -6  10    9.06    0.43 
   2   6  10    8.90    0.36 
  -2   6 -10    8.35    0.39 
  -3  -6 -10   13.26    0.60 
   3  -6  10   13.65    0.54 
  -3   6 -10   13.58    0.51 
   3   6  10   14.18    0.49 
  -4  -6 -10    4.86    0.39 
   4  -6  10    4.41    0.33 
  -4   6 -10    4.22    0.31 
   4   6  10    4.23    0.29 
   5  -6  10    7.96    0.44 
  -5  -6 -10    8.27    0.49 
  -5   6 -10    7.92    0.42 
   5   6  10    8.13    0.41 
  -6  -6 -10   11.95    0.59 
   6  -6  10   12.41    0.55 
  -6   6 -10   12.07    0.53 
   6   6  10   12.33    0.52 
  -7  -6 -10   21.58    0.81 
   7  -6  10   22.08    0.76 
   7   6  10   22.47    0.74 
  -7   6 -10   22.03    0.75 
  -8  -6 -10   11.29    0.61 
   8  -6  10   11.18    0.55 
   8   6  10   10.89    0.53 
  -8   6 -10   10.74    0.54 
   9  -6  10    9.06    0.52 
  -9  -6 -10    9.75    0.58 
  -9   6 -10   10.09    0.55 
   9   6  10   10.82    0.56 
 -10  -6 -10    4.57    0.47 
 -10   6 -10    4.40    0.43 
  10  -7 -10    2.65    0.42 
 -10   7  10    2.59    0.36 
  10   7 -10    3.07    0.41 
   9  -7 -10    8.29    0.56 
   9   7 -10    7.80    0.51 
  -9   7  10    6.86    0.49 
   8  -7 -10    0.93    0.26 
   8   7 -10    0.81    0.22 
  -8   7  10    0.62    0.20 
   7  -7 -10   13.37    0.67 
  -7   7  10   11.88    0.57 
   7   7 -10   12.64    0.56 
   6  -7 -10   14.28    0.67 
  -6  -7  10   14.63    0.57 
  -6   7  10   14.84    0.61 
   5  -7 -10    1.95    0.31 
  -5  -7  10    1.83    0.25 
  -5   7  10    1.73    0.25 
   4  -7 -10    8.12    0.50 
  -4  -7  10    7.99    0.42 
  -4   7  10    7.76    0.42 
  -3  -7  10   17.54    0.62 
   3  -7 -10   18.98    0.74 
  -3   7  10   18.02    0.61 
   3   7 -10   18.88    0.59 
   2  -7 -10   11.56    0.57 
  -2  -7  10   11.97    0.51 
  -2   7  10   12.34    0.47 
   2   7 -10   11.75    0.46 
  -1  -7  10   13.94    0.55 
   1  -7 -10   14.60    0.64 
   1   7 -10   14.46    0.52 
  -1   7  10   14.92    0.50 
   0  -7 -10    6.83    0.45 
   0  -7  10    6.58    0.38 
   0   7 -10    6.49    0.35 
   1  -7  10    7.16    0.40 
  -1  -7 -10    7.51    0.47 
  -1   7 -10    6.81    0.36 
  -2  -7 -10    7.01    0.45 
   2  -7  10    6.81    0.40 
   2   7  10    6.21    0.33 
  -2   7 -10    5.38    0.33 
  -3  -7 -10   16.66    0.69 
   3  -7  10   15.23    0.60 
  -3   7 -10   17.21    0.60 
   3   7  10   17.04    0.56 
   4  -7  10    4.83    0.36 
  -4  -7 -10    4.60    0.39 
  -4   7 -10    4.68    0.33 
   4   7  10    5.23    0.32 
   5  -7  10    7.44    0.43 
  -5  -7 -10    6.79    0.47 
   5   7  10    7.12    0.40 
  -5   7 -10    7.19    0.41 
  -6  -7 -10   10.33    0.58 
   6  -7  10    9.10    0.50 
  -6   7 -10   10.12    0.50 
   6   7  10   10.29    0.49 
  -7  -7 -10   15.47    0.71 
   7  -7  10   13.97    0.62 
  -7   7 -10   14.35    0.61 
   7   7  10   11.96    0.56 
  -8  -7 -10    0.04    0.19 
   8  -7  10   -0.07    0.17 
   8   7  10    0.05    0.14 
  -8   7 -10   -0.01    0.13 
  -9  -7 -10    5.19    0.50 
   9  -7  10    4.42    0.44 
   9   7  10    4.76    0.45 
  -9   7 -10    5.10    0.46 
 -10  -7 -10    0.40    0.25 
  10  -7  10    0.20    0.22 
  10   7  10    0.60    0.23 
 -10   7 -10    0.42    0.22 
   9  -8 -10    1.17    0.33 
  -9   8  10    1.35    0.30 
   8  -8 -10   16.83    0.80 
  -8   8  10   16.69    0.72 
   7  -8 -10    3.74    0.43 
  -7   8  10    4.10    0.40 
   6  -8 -10    3.28    0.41 
  -6   8  10    3.68    0.37 
   5  -8 -10    1.49    0.29 
  -5  -8  10    1.74    0.25 
  -5   8  10    1.45    0.24 
  -4  -8  10    3.67    0.34 
   4  -8 -10    3.88    0.41 
  -4   8  10    3.30    0.33 
   4   8 -10    3.93    0.30 
   3  -8 -10    4.38    0.43 
  -3  -8  10    4.85    0.35 
  -3   8  10    4.72    0.33 
   3   8 -10    5.20    0.33 
  -2  -8  10   31.37    0.88 
   2  -8 -10   32.50    1.02 
  -2   8  10   32.36    0.83 
   2   8 -10   30.74    0.82 
  -1  -8  10   14.17    0.58 
   1  -8 -10   13.90    0.66 
   1   8 -10   15.26    0.55 
   0  -8 -10    1.41    0.28 
   0  -8  10    1.23    0.22 
   0   8 -10    1.51    0.21 
  -1  -8 -10    1.65    0.29 
   1  -8  10    1.51    0.24 
  -1   8 -10    1.32    0.21 
  -2  -8 -10   34.71    1.07 
   2  -8  10   34.31    0.95 
   2   8  10   36.76    0.86 
  -2   8 -10   34.90    0.91 
  -3  -8 -10   15.92    0.70 
   3  -8  10   16.54    0.64 
   3   8  10   15.71    0.56 
  -3   8 -10   15.20    0.58 
  -4  -8 -10    1.25    0.27 
   4  -8  10    1.23    0.24 
   4   8  10    1.65    0.24 
  -4   8 -10    1.47    0.24 
   5  -8  10   -0.05    0.14 
  -5  -8 -10    0.33    0.20 
  -5   8 -10    0.18    0.15 
   5   8  10    0.05    0.13 
  -6  -8 -10    0.53    0.22 
   6  -8  10    0.08    0.17 
  -6   8 -10    0.33    0.18 
   6   8  10    0.35    0.16 
   7  -8  10   12.42    0.60 
  -7  -8 -10   12.78    0.67 
   7   8  10   12.11    0.57 
  -7   8 -10   12.36    0.59 
  -8  -8 -10    1.18    0.28 
   8  -8  10    1.21    0.27 
  -8   8 -10    1.86    0.30 
   8   8  10    1.43    0.27 
  -9  -8 -10    1.02    0.30 
   9  -8  10    0.55    0.23 
  -9   8 -10    0.26    0.21 
   9   8  10    0.55    0.21 
   9  -9 -10    6.05    0.59 
   8  -9 -10    0.24    0.26 
  -8   9  10    0.27    0.21 
   7  -9 -10   16.54    0.80 
  -7   9  10   17.22    0.73 
   6  -9 -10    8.59    0.58 
  -6   9  10    8.21    0.50 
   5  -9 -10    8.51    0.57 
  -5   9  10    8.15    0.48 
  -4  -9  10    6.75    0.42 
   4  -9 -10    6.30    0.50 
  -4   9  10    6.23    0.40 
   4   9 -10    5.92    0.38 
   3  -9 -10   13.60    0.68 
  -3  -9  10   11.93    0.54 
   3   9 -10   11.69    0.52 
  -3   9  10   12.05    0.52 
  -2  -9  10    2.73    0.31 
   2  -9 -10    2.22    0.35 
   2   9 -10    3.12    0.31 
  -1  -9  10    6.78    0.41 
   1  -9 -10    7.45    0.51 
   1   9 -10    5.90    0.38 
   0  -9  10    2.99    0.33 
   0  -9 -10    2.60    0.35 
   0   9 -10    2.65    0.29 
  -1  -9 -10    7.07    0.50 
   1  -9  10    7.36    0.43 
  -1   9 -10    6.04    0.39 
  -2  -9 -10    2.20    0.34 
   2  -9  10    1.99    0.28 
  -2   9 -10    2.01    0.27 
   3  -9  10   38.17    1.05 
  -3  -9 -10   37.58    1.15 
  -3   9 -10   38.56    1.02 
   3   9  10   40.23    0.97 
  -4  -9 -10    3.50    0.42 
   4  -9  10    3.46    0.36 
  -4   9 -10    3.64    0.36 
   4   9  10    3.83    0.31 
  -5  -9 -10    7.14    0.52 
   5  -9  10    7.78    0.48 
   5   9  10    7.91    0.45 
  -5   9 -10    7.78    0.46 
  -6  -9 -10    1.50    0.31 
   6  -9  10    1.46    0.29 
   6   9  10    1.66    0.28 
  -6   9 -10    2.31    0.30 
   7  -9  10    2.36    0.34 
  -7  -9 -10    1.84    0.36 
   7   9  10    2.82    0.35 
  -7   9 -10    2.00    0.30 
  -8  -9 -10    1.41    0.33 
   8  -9  10    0.59    0.25 
  -8   9 -10    0.93    0.25 
   8   9  10    0.75    0.22 
  -8  10  10    6.28    0.51 
   7 -10 -10    5.81    0.59 
  -7  10  10    5.86    0.47 
   6 -10 -10    2.56    0.41 
  -6  10  10    3.19    0.38 
   5 -10 -10    2.59    0.39 
  -5  10  10    2.34    0.32 
  -4 -10  10    9.60    0.51 
   4 -10 -10    9.81    0.63 
  -4  10  10    9.94    0.52 
   4  10 -10    8.81    0.48 
   3 -10 -10    7.54    0.56 
  -3 -10  10    7.03    0.43 
   3  10 -10    6.73    0.42 
   2 -10 -10   26.92    0.98 
  -2 -10  10   26.00    0.84 
   2  10 -10   26.56    0.83 
  -1 -10  10    5.88    0.40 
   1 -10 -10    4.59    0.48 
   1  10 -10    5.50    0.39 
   0 -10  10   18.09    0.70 
   0 -10 -10   19.89    0.84 
   0  10 -10   18.68    0.69 
  -1 -10 -10   16.52    0.76 
   1 -10  10   17.00    0.68 
  -1  10 -10   16.52    0.65 
  -2 -10 -10   16.92    0.77 
   2 -10  10   17.08    0.68 
  -2  10 -10   16.51    0.66 
   3 -10  10    7.25    0.46 
  -3 -10 -10    6.33    0.50 
  -3  10 -10    6.41    0.42 
   3  10  10    7.18    0.41 
  -4 -10 -10    0.61    0.25 
   4 -10  10    0.92    0.24 
   4  10  10    0.49    0.18 
  -4  10 -10    0.53    0.21 
  -5 -10 -10   23.60    0.93 
   5 -10  10   21.43    0.83 
  -5  10 -10   21.66    0.80 
   5  10  10   23.13    0.79 
   6 -10  10    8.44    0.55 
  -6 -10 -10    8.19    0.58 
  -6  10 -10    8.97    0.52 
   6  10  10    7.80    0.48 
  -7 -10 -10    0.10    0.25 
   7 -10  10    0.57    0.25 
  -7  10 -10    0.10    0.17 
   7  10  10    0.25    0.18 
   6 -11 -10    1.98    0.40 
  -6  11  10    2.01    0.34 
   5 -11 -10   16.32    0.83 
  -5  11  10   16.51    0.71 
   4 -11 -10    4.32    0.51 
   4  11 -10    3.81    0.39 
  -3 -11  10    5.29    0.41 
   3 -11 -10    4.12    0.48 
   3  11 -10    5.22    0.40 
   2 -11 -10    0.15    0.22 
  -2 -11  10    0.19    0.17 
   2  11 -10   -0.01    0.15 
   1 -11 -10    5.63    0.55 
  -1 -11  10    5.16    0.41 
   1  11 -10    4.84    0.44 
   0 -11  10    2.54    0.34 
   0 -11 -10    2.83    0.42 
   0  11 -10    2.97    0.34 
   1 -11  10    1.18    0.26 
  -1 -11 -10    1.55    0.34 
  -1  11 -10    1.33    0.26 
  -2 -11 -10   16.18    0.78 
   2 -11  10   14.51    0.67 
  -2  11 -10   15.26    0.66 
  -3 -11 -10    9.30    0.64 
   3 -11  10   10.42    0.57 
  -3  11 -10    9.90    0.54 
   4 -11  10    8.05    0.52 
  -4 -11 -10    6.58    0.53 
  -4  11 -10    8.02    0.50 
   4  11  10    8.01    0.48 
   5 -11  10    8.54    0.56 
  -5 -11 -10    8.58    0.62 
  -5  11 -10    8.73    0.53 
   5  11  10    8.22    0.50 
   6 -11  10    5.03    0.50 
  -6 -11 -10    4.26    0.52 
  -6  11 -10    4.44    0.44 
   6  11  10    5.67    0.43 
   5  12 -10    1.44    0.29 
   4 -12 -10   15.14    0.82 
   4  12 -10   15.84    0.69 
   3 -12 -10    8.04    0.62 
   3  12 -10    7.56    0.49 
  -2 -12  10    0.45    0.21 
   2 -12 -10    0.64    0.28 
   2  12 -10    0.30    0.20 
   1 -12 -10    7.09    0.59 
  -1 -12  10    6.74    0.47 
   1  12 -10    7.09    0.47 
   0 -12 -10    7.07    0.58 
   0 -12  10    8.01    0.51 
   0  12 -10    7.62    0.48 
  -1 -12 -10   26.89    1.05 
   1 -12  10   27.94    0.95 
  -1  12 -10   27.09    0.93 
   2 -12  10    4.59    0.46 
  -2 -12 -10    3.99    0.48 
  -2  12 -10    3.98    0.43 
   3 -12  10    7.45    0.51 
  -3 -12 -10    7.82    0.59 
  -3  12 -10    6.97    0.49 
  -4 -12 -10    4.34    0.51 
   4 -12  10    4.36    0.47 
  -4  12 -10    4.93    0.48 
   1 -13 -10    4.33    0.54 
  -1 -13  10    3.05    0.39 
   1  13 -10    3.48    0.41 
   0 -13 -10    5.60    0.58 
   0 -13  10    5.76    0.47 
   0  13 -10    5.12    0.49 
  -1 -13 -10    1.34    0.37 
   1 -13  10    2.73    0.39 
  -1  13 -10    2.42    0.36 
  11   0 -11   -0.13    0.20 
 -11   0  11   -0.25    0.14 
 -10   0  11    6.08    0.42 
  10   0 -11    7.01    0.50 
  -9   0  11    6.12    0.40 
   9   0 -11    5.94    0.44 
   8   0 -11   12.60    0.60 
  -8   0  11   11.88    0.53 
  -7   0  11   14.40    0.57 
   7   0 -11   14.30    0.61 
  -6   0  11    3.68    0.29 
   6   0 -11    3.12    0.32 
   5   0 -11    1.43    0.23 
  -5   0  11    1.62    0.22 
  -4   0  11    9.40    0.43 
   4   0 -11    9.02    0.44 
  -3   0  11   66.66    1.31 
   3   0 -11   66.75    1.33 
  -2   0  11    1.91    0.22 
   2   0 -11    1.98    0.23 
   1   0 -11    0.24    0.10 
  -1   0  11    0.22    0.11 
   0   0 -11   60.12    1.21 
   0   0  11   61.53    1.20 
   1   0  11  193.07    2.89 
  -1   0 -11  193.57    2.72 
  -1   0 -11  197.15    2.93 
  -2   0 -11    2.81    0.26 
   2   0  11    1.92    0.22 
  -2   0 -11    2.31    0.22 
   3   0  11   11.97    0.44 
  -3   0 -11   11.59    0.44 
  -3   0 -11   10.44    0.40 
  -4   0 -11   10.28    0.42 
  -4   0 -11   10.23    0.41 
   4   0  11    9.79    0.41 
  -5   0 -11   41.06    0.95 
  -6   0 -11    2.52    0.28 
  -7   0 -11    0.17    0.13 
  -8   0 -11    5.98    0.41 
  -9   0 -11   -0.02    0.15 
 -10   0 -11   23.34    0.86 
 -11  -1  11    3.51    0.38 
  11  -1 -11    3.95    0.46 
 -11   1  11    4.04    0.41 
  11   1 -11    3.60    0.45 
  10  -1 -11   12.07    0.65 
 -10  -1  11   11.96    0.56 
 -10   1  11   11.84    0.57 
  10   1 -11   12.76    0.67 
  -9  -1  11    1.30    0.24 
   9  -1 -11    1.07    0.25 
  -9   1  11    1.28    0.23 
   9   1 -11    1.37    0.28 
   8  -1 -11    7.94    0.49 
  -8  -1  11    8.39    0.44 
   8   1 -11    8.11    0.49 
  -8   1  11    8.03    0.44 
   7  -1 -11   19.10    0.71 
  -7  -1  11   18.90    0.66 
   7   1 -11   19.17    0.71 
  -7   1  11   20.00    0.67 
  -6  -1  11   31.13    0.84 
   6  -1 -11   31.57    0.91 
   6   1 -11   30.06    0.87 
  -6   1  11   30.54    0.84 
   5  -1 -11   16.87    0.64 
  -5  -1  11   18.45    0.62 
  -5   1  11   18.21    0.61 
   5   1 -11   18.10    0.63 
   4  -1 -11  153.10    2.54 
  -4  -1  11  154.66    2.48 
  -4   1  11  156.53    2.47 
   4   1 -11  153.45    2.49 
  -3  -1  11   49.08    1.08 
   3  -1 -11   49.24    1.11 
  -3   1  11   49.21    1.06 
   3   1 -11   49.71    1.07 
  -2  -1  11   17.77    0.58 
   2  -1 -11   19.23    0.62 
   2   1 -11   19.28    0.59 
  -2   1  11   18.79    0.59 
   1  -1 -11   18.02    0.59 
  -1  -1  11   17.24    0.57 
   1   1 -11   18.89    0.57 
  -1   1  11   19.52    0.58 
   0  -1 -11   30.86    0.80 
   0  -1  11   30.35    0.77 
   0   1 -11   32.06    0.76 
   0   1 -11   30.54    0.65 
   0   1  11   29.29    0.74 
  -1  -1 -11    8.34    0.39 
  -1  -1 -11    7.71    0.31 
   1  -1  11    7.42    0.36 
   1   1  11    7.96    0.36 
  -1   1 -11    7.53    0.31 
  -1   1 -11    7.66    0.34 
  -2  -1 -11   22.62    0.58 
   2  -1  11   22.56    0.64 
  -2  -1 -11   22.73    0.66 
  -2   1 -11   23.61    0.63 
   2   1  11   22.30    0.61 
  -2   1 -11   23.02    0.60 
  -3  -1 -11    7.71    0.38 
  -3  -1 -11    7.88    0.35 
   3  -1  11    7.77    0.36 
  -3   1 -11    7.83    0.35 
   3   1  11    8.27    0.36 
   4  -1  11    4.57    0.29 
  -4  -1 -11    4.29    0.29 
  -4  -1 -11    4.29    0.28 
   4   1  11    4.21    0.27 
  -4   1 -11    4.71    0.30 
   5  -1  11   49.79    1.04 
  -5  -1 -11   48.29    1.07 
  -5  -1 -11   47.35    1.07 
  -5   1 -11   46.37    1.05 
  -6  -1 -11   13.35    0.53 
  -6  -1 -11   14.19    0.55 
  -6   1 -11   13.75    0.54 
  -7  -1 -11    1.78    0.25 
  -7   1 -11    1.76    0.26 
  -8  -1 -11    5.38    0.38 
  -8   1 -11    4.75    0.37 
  -9   1 -11   14.03    0.63 
  10   1  11    0.21    0.16 
 -10   1 -11    0.06    0.17 
  11   1  11    4.96    0.50 
 -11   1 -11    6.21    0.49 
  11  -2 -11    3.84    0.47 
 -11   2  11    5.74    0.43 
  11   2 -11    5.49    0.53 
 -10  -2  11    4.81    0.37 
  10  -2 -11    5.61    0.47 
 -10   2  11    4.69    0.39 
  10   2 -11    4.82    0.47 
  -9  -2  11    3.47    0.35 
   9  -2 -11    3.47    0.41 
   9   2 -11    3.74    0.41 
  -9   2  11    3.43    0.36 
   8  -2 -11    2.95    0.36 
  -8  -2  11    3.91    0.36 
   8   2 -11    3.75    0.38 
  -8   2  11    2.77    0.31 
   7  -2 -11   15.27    0.64 
  -7  -2  11   16.06    0.59 
  -7   2  11   15.03    0.59 
   7   2 -11   15.12    0.62 
   6  -2 -11    8.89    0.49 
  -6  -2  11    8.45    0.42 
  -6   2  11    7.94    0.41 
   6   2 -11    8.64    0.45 
   5  -2 -11    5.00    0.37 
  -5  -2  11    5.39    0.34 
  -5   2  11    5.27    0.34 
   5   2 -11    5.57    0.34 
  -4  -2  11   14.85    0.54 
   4  -2 -11   14.31    0.57 
  -4   2  11   14.51    0.53 
   4   2 -11   13.74    0.51 
   3  -2 -11   58.16    1.26 
  -3  -2  11   58.71    1.21 
  -3   2  11   56.35    1.17 
   3   2 -11   55.95    1.15 
  -2  -2  11    2.39    0.25 
   2  -2 -11    2.28    0.27 
   2   2 -11    2.36    0.23 
  -2   2  11    2.78    0.23 
   1  -2 -11    1.64    0.22 
  -1  -2  11    0.84    0.17 
   1   2 -11    0.92    0.15 
  -1   2  11    0.93    0.16 
   0  -2 -11   75.59    1.48 
   0  -2  11   72.33    1.40 
   0   2 -11   77.02    1.35 
   0   2  11   73.78    1.35 
   0   2 -11   76.30    1.26 
  -1  -2 -11   54.82    1.19 
   1  -2  11   55.67    1.14 
   1   2  11   54.27    1.07 
  -1   2 -11   55.25    1.02 
  -2  -2 -11   22.32    0.69 
  -2  -2 -11   23.19    0.60 
   2  -2  11   24.93    0.69 
  -2   2 -11   24.63    0.62 
   2   2  11   22.18    0.60 
   3  -2  11    9.78    0.42 
  -3  -2 -11   10.06    0.45 
  -3  -2 -11   10.08    0.40 
  -3   2 -11   10.28    0.41 
   3   2  11    9.69    0.38 
  -4  -2 -11   13.91    0.50 
  -4  -2 -11   13.72    0.53 
   4  -2  11   13.14    0.50 
  -4   2 -11   14.40    0.50 
  -5  -2 -11    1.75    0.23 
   5  -2  11    1.51    0.22 
  -5  -2 -11    1.14    0.21 
  -5   2 -11    1.27    0.20 
  -6  -2 -11    8.47    0.44 
   6  -2  11    8.34    0.40 
  -6   2 -11    8.14    0.43 
  -7  -2 -11    1.99    0.27 
  -7   2 -11    2.79    0.31 
  -8   2 -11    1.38    0.25 
   8   2  11    1.33    0.25
[truncated: 98,256 more chars]
